# Supplementary material for: Aspirin and Cancer Survival: An Analysis of Molecular Mechanisms
Source: MDPI journal article supplement (doi:10.3390/cancers16010223), 2024-01-03
Supplement: s1 [file additonal File S2.xlsx]

## Sheet: grp 1-2
Additional file S2: Excel file table showing gene-gene interactions between all four group of genes
Gene 1	Gene 2	Weight	Network group	Network
STAT3	JAK1	0.00473227	Co-expression	Bonome-Birrer-2008
MAPK1	BAX	0.0191729	Co-expression	Bonome-Birrer-2008
PIK3CA	STAT3	0.00908674	Co-expression	Bonome-Birrer-2008
PIK3CA	MAPK1	0.0123421	Co-expression	Bonome-Birrer-2008
MYC	JAK1	0.00595456	Co-expression	Bonome-Birrer-2008
MYC	MAPK1	0.0188319	Co-expression	Bonome-Birrer-2008
MYC	PIK3CA	0.0122366	Co-expression	Bonome-Birrer-2008
CDK4	PARP2	0.00994648	Co-expression	Bonome-Birrer-2008
CDK4	PARP1	0.00892842	Co-expression	Bonome-Birrer-2008
MAP2K1	PIK3CA	0.00838495	Co-expression	Bonome-Birrer-2008
MAPK1	STAT	0.0179077	Co-expression	Peri-Russo-2012
BRAF	STAT	0.0168092	Co-expression	Peri-Russo-2012
EGFR	JAK1	0.0293349	Co-expression	Peri-Russo-2012
PIK3R1	KRAS	0.0144768	Co-expression	Peri-Russo-2012
RAF1	NFKBIZ	0.00553736	Co-expression	Peri-Russo-2012
MAP2K1	PIK3R3	0.00718544	Co-expression	Peri-Russo-2012
MUC1	STAT	0.00705365	Co-expression	Brunner-Guttman-Yassky-2019
KRAS	BRAF	0.0260144	Co-expression	Brunner-Guttman-Yassky-2019
MYC	PTGS2	0.00897825	Co-expression	Brunner-Guttman-Yassky-2019
MYC	STAT3	0.0108845	Co-expression	Brunner-Guttman-Yassky-2019
NFKBIZ	MYC	0.0150547	Co-expression	Brunner-Guttman-Yassky-2019
RRM2	MAPK1	0.0119009	Co-expression	Brunner-Guttman-Yassky-2019
STAT3	JAK1	0.0196932	Co-expression	Williams-Gascoyne-2010
PIK3CA	BRAF	0.0252554	Co-expression	Williams-Gascoyne-2010
PARP3	MAPK3	0.00466092	Co-expression	Williams-Gascoyne-2010
WNT1	WNT6	0.00596738	Co-expression	Wang-Maris-2006
WNT1	MUC1	0.0118765	Co-expression	Wang-Maris-2006
STAT3	JAK1	0.0166239	Co-expression	Wang-Maris-2006
MAPK1	WNT1	0.00453937	Co-expression	Wang-Maris-2006
CDK4	PARP1	0.00568645	Co-expression	Wang-Maris-2006
MAP2K1	MAPK1	0.00843728	Co-expression	Wang-Maris-2006
RRM2	PARP1	0.00767637	Co-expression	Wang-Maris-2006
ZNF467	ARAF	0.0238262	Co-expression	Wang-Maris-2006
PARP3	ARAF	0.0157883	Co-expression	Wang-Maris-2006
WNT1	WNT6	0.0245304	Co-expression	Dhage-Schneider-2018
MYC	PTGS2	0.0187577	Co-expression	Dhage-Schneider-2018
NFKBIZ	PTGS2	0.0208246	Co-expression	Dhage-Schneider-2018
CDK4	PARP2	0.00800964	Co-expression	Dhage-Schneider-2018
PIK3R1	NFKBIZ	0.0197351	Co-expression	Dhage-Schneider-2018
PIK3R3	PARP1	0.00818323	Co-expression	Dhage-Schneider-2018
BRCA2	PIK3R3	0.0166421	Co-expression	Dhage-Schneider-2018
MAPK3	ARAF	0.00860721	Co-expression	Dhage-Schneider-2018
MAPK3	PORCN	0.00641442	Co-expression	Dhage-Schneider-2018
FER	SEPTIN7	0.0199475	Co-expression	Dhage-Schneider-2018
ZNF467	PTGES2	0.00409934	Co-expression	Dhage-Schneider-2018
PARP3	PORCN	0.0213313	Co-expression	Dhage-Schneider-2018
STAT3	JAK1	0.0118676	Co-expression	Alizadeh-Staudt-2000
MAPK1	BCL2	0.0107879	Co-expression	Alizadeh-Staudt-2000
PIK3CA	BRAF	0.00980036	Co-expression	Alizadeh-Staudt-2000
ARAF	EGFR	0.0172172	Co-expression	Alizadeh-Staudt-2000
MAP2K1	PARP1	0.0193116	Co-expression	Alizadeh-Staudt-2000
SEPTIN7	JAK1	0.0259013	Co-expression	Alizadeh-Staudt-2000
MAPK1	BAX	0.0107067	Co-expression	Woodruff-Fahy-2007
MYC	EGFR	0.0219044	Co-expression	Woodruff-Fahy-2007
RAF1	PARP2	0.0136209	Co-expression	Woodruff-Fahy-2007
PIK3CA	STAT	0.0213491	Co-expression	Perou-Botstein-2000
MYC	PTGES2	0.00954736	Co-expression	Perou-Botstein-2000
PIK3R3	MUC1	0.00784819	Co-expression	Perou-Botstein-2000
ARAF	RAF1	0.020159	Co-expression	Perou-Botstein-2000
RRM2	CDK4	0.00815879	Co-expression	Perou-Botstein-2000
RRM2	BRCA2	0.00759856	Co-expression	Perou-Botstein-2000
HDAC6	ARAF	0.0155293	Co-expression	Perou-Botstein-2000
KRAS	MAPK1	0.0156221	Co-expression	Boldrick-Relman-2002
EGFR	STAT3	0.0143428	Co-expression	Boldrick-Relman-2002
CDK4	MYC	0.00337008	Co-expression	Boldrick-Relman-2002
BRCA2	CDK4	0.00419022	Co-expression	Boldrick-Relman-2002
ARAF	EGFR	0.0218633	Co-expression	Boldrick-Relman-2002
FGFR2	STAT3	0.00617893	Co-expression	Boldrick-Relman-2002
KRAS	PTGS2	0.0126991	Co-expression	Holland-Grimbacher-2007
MYC	BCL2	0.017015	Co-expression	Holland-Grimbacher-2007
MYC	PARP1	0.00310262	Co-expression	Holland-Grimbacher-2007
NFKBIZ	PTGS2	0.00889317	Co-expression	Holland-Grimbacher-2007
PTGES2	MUC1	0.0230605	Co-expression	Bild-Nevins-2006 C
STAT3	BAX	0.0151752	Co-expression	Bild-Nevins-2006 C
CDK4	PARP1	0.00468752	Co-expression	Bild-Nevins-2006 C
PORCN	ARAF	0.0204802	Co-expression	Bild-Nevins-2006 C
PTGES2	BAX	0.010633	Co-expression	Liu-Bratslavsky-2013
EGFR	MUC1	0.0140254	Co-expression	Liu-Bratslavsky-2013
MYC	BCL2	0.00998266	Co-expression	Liu-Bratslavsky-2013
RRM2	BRCA2	0.0167078	Co-expression	Liu-Bratslavsky-2013
PIK3CA	BRAF	0.0239856	Co-expression	Salas-Chibon-2015
MYC	JAK1	0.008016	Co-expression	Salas-Chibon-2015
MYC	PTGS2	0.00488417	Co-expression	Salas-Chibon-2015
NFKBIZ	PTGS2	0.0100273	Co-expression	Salas-Chibon-2015
NFKBIZ	KRAS	0.0164361	Co-expression	Salas-Chibon-2015
NFKBIZ	MYC	0.00600483	Co-expression	Salas-Chibon-2015
RAF1	MYC	0.00530478	Co-expression	Salas-Chibon-2015
RRM2	BRCA2	0.0115262	Co-expression	Salas-Chibon-2015
PARP1	PARP2	0.00569009	Co-expression	Lee-Fine-2006
PARP1	MAPK1	0.00697852	Co-expression	Lee-Fine-2006
MYC	JAK1	0.0209745	Co-expression	Lee-Fine-2006
NFKBIZ	PIK3CD	0.00893113	Co-expression	Lee-Fine-2006
CDK4	PIK3CA	0.00666848	Co-expression	Lee-Fine-2006
PIK3R3	PARP1	0.00523925	Co-expression	Lee-Fine-2006
PARP3	PORCN	0.00810197	Co-expression	Lee-Fine-2006
PIK3CA	MAPK1	0.00785125	Co-expression	Day-Maxwell-2011
MYC	BCL2	0.0233511	Co-expression	Day-Maxwell-2011
MAP2K1	PARP1	0.00552967	Co-expression	Day-Maxwell-2011
HDAC6	WNT1	0.00579286	Co-expression	Day-Maxwell-2011
ZNF467	WNT1	0.00466876	Co-expression	Day-Maxwell-2011
MUC1	STAT	0.00974817	Co-expression	Brodmerkel-Krueger-2019 B
MYC	PTGS2	0.0113673	Co-expression	Brodmerkel-Krueger-2019 B
MYC	STAT3	0.0163962	Co-expression	Brodmerkel-Krueger-2019 B
RRM2	MAPK1	0.00706791	Co-expression	Brodmerkel-Krueger-2019 B
BRAF	STAT3	0.0156322	Co-expression	Ross-Brown-2000
MYC	STAT3	0.00969398	Co-expression	Ross-Brown-2000
PIK3R3	PIK3R1	0.00952425	Co-expression	Ross-Brown-2000
BRCA2	BCL2	0.0120545	Co-expression	Ross-Brown-2000
MAPK3	PIK3R1	0.00831459	Co-expression	Ross-Brown-2000
KRAS	PTGS2	0.0229632	Co-expression	Naesens-Sarwal-2011
MYC	STAT3	0.00966849	Co-expression	Naesens-Sarwal-2011
NFKBIZ	STAT3	0.0150519	Co-expression	Naesens-Sarwal-2011
NFKBIZ	MYC	0.0115736	Co-expression	Naesens-Sarwal-2011
CDK4	BAX	0.014559	Co-expression	Naesens-Sarwal-2011
MAP2K1	PARP1	0.00560013	Co-expression	Naesens-Sarwal-2011
MAP2K1	PIK3R3	0.0119898	Co-expression	Naesens-Sarwal-2011
PIK3CA	JAK1	0.0210137	Co-expression	Hinze-Grom-2010
MYC	PARP1	0.0143493	Co-expression	Hinze-Grom-2010
PIK3CD	MYC	0.0198508	Co-expression	Hinze-Grom-2010
NFKBIZ	PTGS2	0.0156141	Co-expression	Hinze-Grom-2010
NFKBIZ	KRAS	0.0146961	Co-expression	Hinze-Grom-2010
CDK4	PARP1	0.0104148	Co-expression	Hinze-Grom-2010
CDK4	MYC	0.00867949	Co-expression	Hinze-Grom-2010
MAP2K1	STAT	0.0200829	Co-expression	Hinze-Grom-2010
FER	MAP2K1	0.0127974	Co-expression	Hinze-Grom-2010
MUC1	STAT	0.00831694	Co-expression	Jabbari-Christiano-2016
MYC	PTGS2	0.0091555	Co-expression	Jabbari-Christiano-2016
MYC	STAT3	0.0158069	Co-expression	Jabbari-Christiano-2016
NFKBIZ	MYC	0.0117407	Co-expression	Jabbari-Christiano-2016
MYC	MAPK1	0.0232158	Co-expression	Peng-Katze-2009
PARP1	PTGES2	0.00876248	Co-expression	Vallat-Bahram-2013
PIK3CA	JAK1	0.0172648	Co-expression	Vallat-Bahram-2013
NFKBIZ	MYC	0.00450551	Co-expression	Vallat-Bahram-2013
STAT3	MUC1	0.0168019	Co-expression	Yu-Tan-2008
STAT3	JAK1	0.0188565	Co-expression	Yu-Tan-2008
PIK3R3	PIK3R1	0.0174767	Co-expression	Yu-Tan-2008
WNT1	WNT6	0.00604417	Co-expression	Niu-Wang-2010
WNT1	MUC1	0.00501472	Co-expression	Niu-Wang-2010
MYC	BCL2	0.0174679	Co-expression	Niu-Wang-2010
ZNF467	WNT1	0.00630584	Co-expression	Niu-Wang-2010
STAT3	MUC1	0.00837753	Co-expression	Bild-Nevins-2006 A
MYC	MAPK1	0.0112287	Co-expression	Bild-Nevins-2006 A
MYC	EGFR	0.00980881	Co-expression	Bild-Nevins-2006 A
CDK4	PARP1	0.00288723	Co-expression	Bild-Nevins-2006 A
MAP2K1	BAX	0.00967558	Co-expression	Bild-Nevins-2006 A
MAP2K1	CDK4	0.00282064	Co-expression	Bild-Nevins-2006 A
KRAS	MAPK1	0.0166157	Co-expression	Perou-Botstein-1999
PTGES2	BAX	0.0121978	Co-expression	Wang-McClelland-2010 A
PIK3CA	JAK1	0.0192751	Co-expression	Wang-McClelland-2010 A
NFKBIZ	PTGS2	0.0116292	Co-expression	Wang-McClelland-2010 A
CDK4	BAX	0.00774807	Co-expression	Wang-McClelland-2010 A
PIK3R3	MYC	0.0103757	Co-expression	Wang-McClelland-2010 A
MAP2K1	STAT	0.00582497	Co-expression	Wang-McClelland-2010 A
MAP2K1	BRAF	0.011761	Co-expression	Wang-McClelland-2010 A
MAP2K1	KRAS	0.0121173	Co-expression	Wang-McClelland-2010 A
MAPK1	JAK1	0.027078	Co-expression	Voraphani-Wenzel-2014
ARAF	PTGES2	0.00390907	Co-expression	Voraphani-Wenzel-2014
ARAF	STAT3	0.00876525	Co-expression	Voraphani-Wenzel-2014
FGFR2	EGFR	0.00795374	Co-expression	Voraphani-Wenzel-2014
RRM2	BRCA2	0.0133098	Co-expression	Voraphani-Wenzel-2014
PTGES2	MUC1	0.0162824	Co-expression	Hägg-Björkegren-2009
ZNF467	MAP2K1	0.00767907	Co-expression	Hägg-Björkegren-2009
EGFR	MAPK1	0.0195666	Co-expression	Wu-Garvey-2007
SEPTIN7	JAK1	0.0118023	Co-expression	Wu-Garvey-2007
SEPTIN7	PIK3CA	0.00931039	Co-expression	Wu-Garvey-2007
STAT3	BAX	0.0217407	Co-expression	Bahr-Bowler-2013
CDK4	PARP1	0.0039183	Co-expression	Bahr-Bowler-2013
HDAC6	ARAF	0.00275957	Co-expression	Bahr-Bowler-2013
PARP1	PTGES2	0.0190857	Co-expression	Burczynski-Dorner-2006
KRAS	PIK3CA	0.00695227	Co-expression	Burczynski-Dorner-2006
CDK4	PARP1	0.00776078	Co-expression	Burczynski-Dorner-2006
PIK3R1	PIK3CA	0.00519114	Co-expression	Burczynski-Dorner-2006
PTGES2	MUC1	0.02305	Co-expression	Corvol-Baranzini-2008
CDK4	MYC	0.0106283	Co-expression	Corvol-Baranzini-2008
PIK3R1	NFKBIZ	0.0222687	Co-expression	Corvol-Baranzini-2008
PORCN	PTGES2	0.00852609	Co-expression	Corvol-Baranzini-2008
PTGS2	MUC1	0.0212189	Co-expression	Den Boer-Pieters-2009 B
PIK3CA	JAK1	0.00344514	Co-expression	Den Boer-Pieters-2009 B
PORCN	ARAF	0.00722514	Co-expression	Den Boer-Pieters-2009 B
MAP2K1	MAPK1	0.012151	Co-expression	Den Boer-Pieters-2009 B
RRM2	BRCA2	0.00669452	Co-expression	Den Boer-Pieters-2009 B
PTGS2	STAT	0.0256554	Co-expression	Venet-Textoris-2017
MAPK3	ARAF	0.0061086	Co-expression	Venet-Textoris-2017
MYC	PTGS2	0.0215233	Co-expression	Shalhoub-Martin-2010
MAP2K1	MYC	0.0156687	Co-expression	Shalhoub-Martin-2010
PTGS2	MUC1	0.0173874	Co-expression	Holleman-Evans-2004
PIK3CA	JAK1	0.0063141	Co-expression	Holleman-Evans-2004
PIK3CD	PARP1	0.0117863	Co-expression	Holleman-Evans-2004
CDK4	BAX	0.00738328	Co-expression	Holleman-Evans-2004
PORCN	ARAF	0.00955066	Co-expression	Holleman-Evans-2004
MUC1	STAT	0.0138366	Co-expression	Yao-Jallal-2008
PTGES2	BAX	0.00864026	Co-expression	Yao-Jallal-2008
MYC	PTGS2	0.00591614	Co-expression	Yao-Jallal-2008
PIK3R1	JAK1	0.00985772	Co-expression	Yao-Jallal-2008
PIK3R1	PIK3CA	0.00674198	Co-expression	Yao-Jallal-2008
ARAF	PTGES2	0.0089586	Co-expression	Yao-Jallal-2008
RRM2	BRCA2	0.00735217	Co-expression	Yao-Jallal-2008
KRAS	PIK3CA	0.0216485	Co-expression	Yang-Steele-2012
HDAC6	ARAF	0.00725884	Co-expression	Yang-Steele-2012
MYC	PTGES2	0.0192333	Co-expression	Sørlie-Børresen-Dale-2001
PIK3R1	JAK1	0.0227444	Co-expression	Sørlie-Børresen-Dale-2001
MAP2K1	JAK1	0.0158957	Co-expression	Sørlie-Børresen-Dale-2001
SEPTIN7	STAT	0.00814835	Co-expression	Sørlie-Børresen-Dale-2001
SEPTIN7	KRAS	0.00682236	Co-expression	Sørlie-Børresen-Dale-2001
HDAC6	ARAF	0.0155984	Co-expression	Sørlie-Børresen-Dale-2001
BRAF	STAT3	0.0217802	Co-expression	Payton-Ley-2009
RAF1	PTGS2	0.00603497	Co-expression	Payton-Ley-2009
PARP3	PTGES2	0.0194216	Co-expression	Payton-Ley-2009
BRAF	STAT3	0.0084966	Co-expression	Govoni-Singh-2020
KRAS	BRAF	0.0124761	Co-expression	Govoni-Singh-2020
MYC	PARP1	0.00542832	Co-expression	Govoni-Singh-2020
PIK3CD	MAPK1	0.0145552	Co-expression	Govoni-Singh-2020
NFKBIZ	PTGS2	0.00709326	Co-expression	Govoni-Singh-2020
RAF1	JAK1	0.00691935	Co-expression	Govoni-Singh-2020
MAPK3	WNT6	0.00595717	Co-expression	Govoni-Singh-2020
MAPK3	FGFR2	0.00513532	Co-expression	Govoni-Singh-2020
MAPK3	WNT7B	0.00157212	Co-expression	Govoni-Singh-2020
ZNF467	JAK1	0.00383763	Co-expression	Govoni-Singh-2020
ZNF467	PIK3CD	0.00218855	Co-expression	Govoni-Singh-2020
ZNF467	RAF1	0.00144148	Co-expression	Govoni-Singh-2020
ZNF467	MAPK3	0.000681974	Co-expression	Govoni-Singh-2020
MAPK1	BAX	0.0237071	Co-expression	Wang-Hui-2007
NFKBIZ	PTGS2	0.00976698	Co-expression	Wang-Hui-2007
CDK4	BAX	0.00517187	Co-expression	Wang-Hui-2007
RAF1	PARP2	0.00492344	Co-expression	Wang-Hui-2007
RRM2	PARP2	0.00209296	Co-expression	Wang-Hui-2007
MUC1	STAT	0.00977007	Co-expression	Brodmerkel-Krueger-2019 A
MYC	STAT3	0.0173698	Co-expression	Brodmerkel-Krueger-2019 A
STAT3	PTGES2	0.0196693	Co-expression	den Boon-Ahlquist-2015
PARP1	PARP2	0.00333922	Co-expression	den Boon-Ahlquist-2015
PIK3R3	PARP1	0.00846757	Co-expression	den Boon-Ahlquist-2015
ARAF	PARP1	0.00732311	Co-expression	den Boon-Ahlquist-2015
BRAF	STAT	0.0238388	Co-expression	Wong-Aronow-2007
NFKBIZ	KRAS	0.011829	Co-expression	Wong-Aronow-2007
CDK4	PARP1	0.00561559	Co-expression	Wong-Aronow-2007
PIK3R1	JAK1	0.0120213	Co-expression	Wong-Aronow-2007
RRM2	PARP2	0.00632759	Co-expression	Wong-Aronow-2007
RRM2	BRCA2	0.0108811	Co-expression	Wong-Aronow-2007
STAT3	JAK1	0.0277726	Co-expression	Wouters-Delwel-2009
PIK3CD	STAT	0.0138351	Co-expression	Wouters-Delwel-2009
NFKBIZ	PTGS2	0.00879427	Co-expression	Wouters-Delwel-2009
MAP2K1	MAPK1	0.00847964	Co-expression	Wouters-Delwel-2009
RRM2	BRCA2	0.00860281	Co-expression	Wouters-Delwel-2009
ZNF467	MAP2K1	0.00810972	Co-expression	Wouters-Delwel-2009
MUC1	STAT	0.0132995	Co-expression	Bigler-Russell-2013
PTGES2	WNT1	0.0073872	Co-expression	Bigler-Russell-2013
MYC	STAT3	0.0052914	Co-expression	Bigler-Russell-2013
NFKBIZ	MYC	0.00669981	Co-expression	Bigler-Russell-2013
BRCA2	BAX	0.00968152	Co-expression	Bigler-Russell-2013
BRCA2	MYC	0.00433221	Co-expression	Bigler-Russell-2013
MUC1	STAT	0.0156555	Co-expression	Brunner-Guttman-Yassky-2018
MYC	PTGS2	0.00625632	Co-expression	Brunner-Guttman-Yassky-2018
EGFR	JAK1	0.0226556	Co-expression	Skrzypczak-Ostrowsk-2010
MAP2K1	MAPK1	0.0164697	Co-expression	Skrzypczak-Ostrowsk-2010
MAP2K1	PIK3R3	0.0143726	Co-expression	Skrzypczak-Ostrowsk-2010
STAT3	JAK1	0.0116317	Co-expression	Radtke-Downing-2009
PIK3CA	JAK1	0.0110296	Co-expression	Radtke-Downing-2009
CDK4	PARP1	0.00340524	Co-expression	Radtke-Downing-2009
ARAF	PTGES2	0.021275	Co-expression	Radtke-Downing-2009
RRM2	PARP2	0.00891627	Co-expression	Radtke-Downing-2009
MAPK3	ARAF	0.0210076	Co-expression	Radtke-Downing-2009
PTGES2	BAX	0.0108784	Co-expression	Hatzis-Symmans-2011 B
KRAS	STAT	0.0139273	Co-expression	Hatzis-Symmans-2011 B
PARP3	MAPK3	0.00934398	Co-expression	Hatzis-Symmans-2011 B
PIK3CA	JAK1	0.0159108	Co-expression	Balgobind-den Boer-2011
PIK3CA	BRAF	0.0102556	Co-expression	Balgobind-den Boer-2011
NFKBIZ	PTGS2	0.0133959	Co-expression	Balgobind-den Boer-2011
CDK4	PARP1	0.00153904	Co-expression	Balgobind-den Boer-2011
MAP2K1	STAT	0.0108362	Co-expression	Balgobind-den Boer-2011
RRM2	BRCA2	0.00957124	Co-expression	Balgobind-den Boer-2011
KRAS	PTGS2	0.0132223	Co-expression	Rusch-Gill-2019
MYC	PARP1	0.00596265	Co-expression	Rusch-Gill-2019
MAP2K1	MYC	0.00570134	Co-expression	Rusch-Gill-2019
HDAC6	PTGES2	0.00389277	Co-expression	Rusch-Gill-2019
PARP3	PTGES2	0.00133748	Co-expression	Rusch-Gill-2019
PARP1	STAT3	0.0129731	Co-expression	Reeve-Halloran-2013
PARP1	MAPK1	0.0101852	Co-expression	Reeve-Halloran-2013
NFKBIZ	JAK1	0.0126545	Co-expression	Reeve-Halloran-2013
NFKBIZ	MYC	0.0064179	Co-expression	Reeve-Halloran-2013
MAP2K1	PARP1	0.00586588	Co-expression	Reeve-Halloran-2013
MAP2K1	RAF1	0.010229	Co-expression	Reeve-Halloran-2013
RRM2	BRCA2	0.0122018	Co-expression	Reeve-Halloran-2013
PIK3CA	MAPK1	0.0168186	Co-expression	Lv-Zhang-2017
CDK4	PTGES2	0.00458056	Co-expression	Lv-Zhang-2017
RAF1	PIK3CD	0.0142312	Co-expression	Lv-Zhang-2017
ARAF	PTGES2	0.00661089	Co-expression	Lv-Zhang-2017
ARAF	CDK4	0.0020151	Co-expression	Lv-Zhang-2017
HDAC6	CDK4	0.00620632	Co-expression	Lv-Zhang-2017
HDAC6	ARAF	0.009597	Co-expression	Lv-Zhang-2017
MUC1	STAT	0.00633241	Co-expression	Tomalin-Krueger-2020
MYC	PTGS2	0.00931298	Co-expression	Tomalin-Krueger-2020
MYC	BAX	0.00801657	Co-expression	Tomalin-Krueger-2020
BRCA2	MYC	0.0082362	Co-expression	Tomalin-Krueger-2020
RRM2	BRCA2	0.00500514	Co-expression	Tomalin-Krueger-2020
STAT3	JAK1	0.0240557	Co-expression	Sheffer-Domany-2009 B
CDK4	PARP1	0.00377441	Co-expression	Sheffer-Domany-2009 B
CDK4	MYC	0.00358736	Co-expression	Sheffer-Domany-2009 B
RRM2	CDK4	0.00154901	Co-expression	Sheffer-Domany-2009 B
RRM2	BRCA2	0.00587022	Co-expression	Sheffer-Domany-2009 B
MUC1	STAT	0.00839984	Co-expression	Suárez-Fariñas-Krueger-2012
MYC	STAT3	0.0162829	Co-expression	Suárez-Fariñas-Krueger-2012
NFKBIZ	MYC	0.0149162	Co-expression	Suárez-Fariñas-Krueger-2012
STAT3	JAK1	0.026696	Co-expression	Verhaak-Valk-2009
PIK3CD	STAT	0.0147097	Co-expression	Verhaak-Valk-2009
NFKBIZ	PTGS2	0.0100103	Co-expression	Verhaak-Valk-2009
MAP2K1	MAPK1	0.00872141	Co-expression	Verhaak-Valk-2009
RRM2	BRCA2	0.00989261	Co-expression	Verhaak-Valk-2009
MAPK3	MAP2K1	0.00688108	Co-expression	Verhaak-Valk-2009
STAT3	JAK1	0.0169042	Co-expression	Mallon-McKay-2013
STAT3	JAK1	0.0118326	Co-expression	Elashoff-Topol-2011 A
MAPK1	STAT3	0.00911548	Co-expression	Elashoff-Topol-2011 A
PIK3CD	STAT3	0.0056574	Co-expression	Elashoff-Topol-2011 A
RAF1	PTGS2	0.00632373	Co-expression	Elashoff-Topol-2011 A
RAF1	PIK3CD	0.00349191	Co-expression	Elashoff-Topol-2011 A
PARP1	BAX	0.0185098	Co-expression	Dobbin-Giordano-2005
CDK4	MYC	0.00358879	Co-expression	Dobbin-Giordano-2005
PTGES2	BAX	0.00958707	Co-expression	Hatzis-Symmans-2011 C
KRAS	STAT	0.0168461	Co-expression	Hatzis-Symmans-2011 C
CDK4	PARP1	0.0168667	Co-expression	Hatzis-Symmans-2011 C
RRM2	BRCA2	0.00917305	Co-expression	Hatzis-Symmans-2011 C
PARP3	MAPK3	0.00848428	Co-expression	Hatzis-Symmans-2011 C
PTGES2	BAX	0.00947898	Co-expression	Xiang-Weilbaecher-2015
KRAS	PTGS2	0.0109109	Co-expression	Xiang-Weilbaecher-2015
MAPK3	ARAF	0.0202324	Co-expression	Xiang-Weilbaecher-2015
PARP1	STAT3	0.0194797	Co-expression	Burington-Shaughnessy-2008
RAF1	MAPK1	0.0164894	Co-expression	Burington-Shaughnessy-2008
KRAS	PIK3CA	0.0134119	Co-expression	Wynn-Wong-2011
MYC	PARP1	0.00714975	Co-expression	Wynn-Wong-2011
CDK4	PARP2	0.00671611	Co-expression	Wynn-Wong-2011
PIK3R1	JAK1	0.0148765	Co-expression	Wynn-Wong-2011
RRM2	BRCA2	0.010813	Co-expression	Wynn-Wong-2011
SEPTIN7	PIK3CA	0.0155447	Co-expression	Wynn-Wong-2011
WNT1	WNT6	0.00728652	Co-expression	Wardell-McDonnell-2012
PARP1	STAT	0.00691818	Co-expression	Wardell-McDonnell-2012
CDK4	PARP2	0.00148979	Co-expression	Wardell-McDonnell-2012
PORCN	MYC	0.00632028	Co-expression	Wardell-McDonnell-2012
ZNF467	PIK3R3	0.00486238	Co-expression	Wardell-McDonnell-2012
KRAS	MAPK1	0.00921287	Co-expression	Noble-Diehl-2010
EGFR	KRAS	0.00685525	Co-expression	Noble-Diehl-2010
NFKBIZ	MUC1	0.0109547	Co-expression	Noble-Diehl-2010
ARAF	PIK3R1	0.0112459	Co-expression	Noble-Diehl-2010
PARP1	PARP2	0.00821844	Co-expression	Nakamura-Takeuchi-2016
PIK3CA	STAT	0.00757754	Co-expression	Nakamura-Takeuchi-2016
RAF1	STAT3	0.00456301	Co-expression	Nakamura-Takeuchi-2016
SEPTIN7	PIK3CA	0.00597962	Co-expression	Nakamura-Takeuchi-2016
PIK3CA	MAPK1	0.0143074	Co-expression	Dombroski-Spielman-2010
RRM2	PIK3R3	0.00397903	Co-expression	Dombroski-Spielman-2010
PARP3	PORCN	0.00651053	Co-expression	Dombroski-Spielman-2010
STAT3	BAX	0.018974	Co-expression	Kim-Green-2011 A
PIK3CA	MAPK1	0.00616122	Co-expression	Kim-Green-2011 A
CDK4	PARP1	0.00371941	Co-expression	Kim-Green-2011 A
CDK4	MYC	0.00399051	Co-expression	Kim-Green-2011 A
PORCN	PTGES2	0.0117963	Co-expression	Kim-Green-2011 A
MAP2K1	MAPK1	0.0153279	Co-expression	Kim-Green-2011 A
MAP2K1	PIK3R3	0.0156957	Co-expression	Kim-Green-2011 A
WNT7B	EGFR	0.015409	Co-expression	Kim-Green-2011 A
EGFR	PTGS2	0.0122614	Co-expression	Kim-Paik-2011
BRCA2	MYC	0.0136057	Co-expression	Kim-Paik-2011
FGFR2	MUC1	0.0154458	Co-expression	Kim-Paik-2011
RRM2	PARP2	0.0145385	Co-expression	Kim-Paik-2011
STAT3	JAK1	0.0201781	Co-expression	Stirewalt-Radich-2008
SEPTIN7	JAK1	0.0161662	Co-expression	Stirewalt-Radich-2008
FER	PIK3CA	0.0145593	Co-expression	Stirewalt-Radich-2008
ZNF467	MAP2K1	0.015546	Co-expression	Stirewalt-Radich-2008
MYC	PTGS2	0.016423	Co-expression	Wang-Cheung-2015
PIK3CD	MYC	0.018281	Co-expression	Wang-Cheung-2015
CDK4	PARP2	0.0036675	Co-expression	Wang-Cheung-2015
BRCA2	PARP2	0.00960446	Co-expression	Wang-Cheung-2015
BRCA2	CDK4	0.00691369	Co-expression	Wang-Cheung-2015
RAF1	KRAS	0.0118485	Co-expression	Wang-Cheung-2015
WNT7B	PORCN	0.0207706	Co-expression	Wang-Cheung-2015
MAPK3	WNT6	0.00807327	Co-expression	Wang-Cheung-2015
HDAC6	BAX	0.0105386	Co-expression	Wang-Cheung-2015
PARP1	STAT3	0.0115072	Co-expression	Petruzziello-Pellegrini-Marsden-2012
RAF1	JAK1	0.00460661	Co-expression	Petruzziello-Pellegrini-Marsden-2012
RRM2	CDK4	0.0102002	Co-expression	Petruzziello-Pellegrini-Marsden-2012
KRAS	PTGS2	0.01602	Co-expression	Levy-Hessner-2012 A
NFKBIZ	PTGS2	0.00679099	Co-expression	Levy-Hessner-2012 A
NFKBIZ	KRAS	0.0115517	Co-expression	Levy-Hessner-2012 A
PIK3R1	NFKBIZ	0.00508538	Co-expression	Levy-Hessner-2012 A
MAPK3	PIK3R3	0.00847087	Co-expression	Levy-Hessner-2012 A
PIK3CA	JAK1	0.0168496	Co-expression	Meyer-Debatin-2011
CDK4	PARP1	0.00150888	Co-expression	Meyer-Debatin-2011
BRCA2	PARP2	0.00315588	Co-expression	Meyer-Debatin-2011
BRCA2	PIK3R3	0.00377568	Co-expression	Meyer-Debatin-2011
PORCN	ARAF	0.0179653	Co-expression	Meyer-Debatin-2011
MUC1	STAT	0.00360174	Co-expression	Lee-Kim-2008
STAT3	MUC1	0.00391435	Co-expression	Lee-Kim-2008
MYC	PTGES2	0.00430694	Co-expression	Lee-Kim-2008
MYC	MAPK1	0.00829127	Co-expression	Lee-Kim-2008
ZNF467	WNT1	0.0112459	Co-expression	Lee-Kim-2008
PARP3	MUC1	0.00223693	Co-expression	Lee-Kim-2008
PIK3CA	JAK1	0.0142045	Co-expression	Smirnov-Cheung-2012
PIK3CD	PARP1	0.00769521	Co-expression	Smirnov-Cheung-2012
CDK4	PTGES2	0.00729018	Co-expression	Smirnov-Cheung-2012
RAF1	PARP1	0.00117525	Co-expression	Smirnov-Cheung-2012
ARAF	PTGES2	0.0031881	Co-expression	Smirnov-Cheung-2012
PORCN	ARAF	0.00183082	Co-expression	Smirnov-Cheung-2012
MAP2K1	MYC	0.00642737	Co-expression	Smirnov-Cheung-2012
MAP2K1	RAF1	0.0012994	Co-expression	Smirnov-Cheung-2012
RRM2	PARP2	0.0111654	Co-expression	Smirnov-Cheung-2012
MAPK3	ARAF	0.00436166	Co-expression	Smirnov-Cheung-2012
PARP3	ZNF467	0.0277528	Co-expression	Smirnov-Cheung-2012
MAPK1	STAT3	0.0160692	Co-expression	Taylor-Kwo-2008
MYC	PARP1	0.00235346	Co-expression	Taylor-Kwo-2008
BRAF	JAK1	0.0172926	Co-expression	Singh-Celli-2011
NFKBIZ	PTGS2	0.0127655	Co-expression	Singh-Celli-2011
CDK4	MYC	0.0104958	Co-expression	Singh-Celli-2011
PIK3R1	STAT	0.0118819	Co-expression	Singh-Celli-2011
ZNF467	ARAF	0.00697654	Co-expression	Singh-Celli-2011
PIK3CA	STAT	0.00749925	Co-expression	Maertzdorf-Kaufmann-2011
KRAS	PIK3CA	0.00785689	Co-expression	Maertzdorf-Kaufmann-2011
RAF1	PIK3CD	0.00704921	Co-expression	Maertzdorf-Kaufmann-2011
PIK3CA	JAK1	0.0171269	Co-expression	Pellagatti-Boultwood-2010
NFKBIZ	PTGS2	0.00972772	Co-expression	Pellagatti-Boultwood-2010
CDK4	PARP1	0.00463712	Co-expression	Pellagatti-Boultwood-2010
MAP2K1	PARP1	0.00807695	Co-expression	Pellagatti-Boultwood-2010
HDAC6	PTGES2	0.00616551	Co-expression	Pellagatti-Boultwood-2010
KRAS	BRAF	0.022192	Co-expression	Horiuchi-Sawa-2016
CDK4	PARP1	0.00454789	Co-expression	Horiuchi-Sawa-2016
BRCA2	MYC	0.0056256	Co-expression	Horiuchi-Sawa-2016
MAP2K1	BRAF	0.0109689	Co-expression	Horiuchi-Sawa-2016
MAP2K1	PIK3CA	0.011418	Co-expression	Horiuchi-Sawa-2016
RRM2	CDK4	0.00517925	Co-expression	Horiuchi-Sawa-2016
STAT3	MUC1	0.018264	Co-expression	Smeets-Christiaens-2011
STAT3	BCL2	0.0135936	Co-expression	Rieger-Chu-2004
PIK3R1	PIK3CA	0.00994757	Co-expression	Rieger-Chu-2004
MAP2K1	PIK3CD	0.0215059	Co-expression	Rieger-Chu-2004
MAP2K1	RAF1	0.022752	Co-expression	Rieger-Chu-2004
PTGES2	BAX	0.0148032	Co-expression	Liu-Godbout-2011
CDK4	BAX	0.0156264	Co-expression	Liu-Godbout-2011
PIK3CA	BRAF	0.00893339	Co-expression	Hirabayashi-Kiyokawa-2017
KRAS	BRAF	0.00812527	Co-expression	Hirabayashi-Kiyokawa-2017
PIK3CD	MAPK1	0.0260614	Co-expression	Hirabayashi-Kiyokawa-2017
PIK3R3	PARP1	0.00671656	Co-expression	Hirabayashi-Kiyokawa-2017
PORCN	ARAF	0.00440179	Co-expression	Hirabayashi-Kiyokawa-2017
MAPK3	PTGES2	0.00225409	Co-expression	Hirabayashi-Kiyokawa-2017
MYC	EGFR	0.0130723	Co-expression	Phatak-Kopelovich-2019
BRCA2	PIK3R3	0.00898306	Co-expression	Phatak-Kopelovich-2019
RAF1	NFKBIZ	0.00886361	Co-expression	Phatak-Kopelovich-2019
MAPK3	MUC1	0.0169147	Co-expression	Phatak-Kopelovich-2019
MYC	MAPK1	0.0130463	Co-expression	Lee-MacDonald-2013
CDK4	PARP1	0.00333475	Co-expression	Lee-MacDonald-2013
PIK3R3	PARP1	0.0115534	Co-expression	Lee-MacDonald-2013
MAP2K1	RAF1	0.00609876	Co-expression	Lee-MacDonald-2013
RRM2	PARP1	0.00695917	Co-expression	Lee-MacDonald-2013
RRM2	BRCA2	0.00900151	Co-expression	Lee-MacDonald-2013
PARP1	BRAF	0.010379	Co-expression	Tateno-Hirabayashi-2013
PARP2	PTGS2	0.00935216	Co-expression	Tsukamoto-Sugihara-2011
PTGES2	BAX	0.00877327	Co-expression	Tsukamoto-Sugihara-2011
NFKBIZ	JAK1	0.0201428	Co-expression	Tsukamoto-Sugihara-2011
CDK4	PARP1	0.00284884	Co-expression	Tsukamoto-Sugihara-2011
CDK4	MYC	0.00172217	Co-expression	Tsukamoto-Sugihara-2011
SEPTIN7	PIK3CA	0.0170306	Co-expression	Tsukamoto-Sugihara-2011
MAPK3	MUC1	0.00248654	Co-expression	Tsukamoto-Sugihara-2011
FER	PIK3R1	0.0302181	Co-expression	Tsukamoto-Sugihara-2011
STAT3	JAK1	0.00730829	Co-expression	Beane-Spira-2007
PIK3CA	MAPK1	0.00958667	Co-expression	Beane-Spira-2007
RAF1	JAK1	0.0066288	Co-expression	Beane-Spira-2007
MAP2K1	JAK1	0.0049991	Co-expression	Beane-Spira-2007
MAP2K1	STAT3	0.00861105	Co-expression	Beane-Spira-2007
MYC	PTGS2	0.0178396	Co-expression	Sun-Troester-2013
NFKBIZ	PTGS2	0.0218595	Co-expression	Sun-Troester-2013
NFKBIZ	MYC	0.0188678	Co-expression	Sun-Troester-2013
RRM2	PARP1	0.00990493	Co-expression	Sun-Troester-2013
WNT7B	MUC1	0.00784905	Co-expression	Sun-Troester-2013
MAPK3	ARAF	0.00544548	Co-expression	Sun-Troester-2013
PIK3CA	JAK1	0.00905971	Co-expression	Ceroi-Saas-2016
KRAS	PIK3CA	0.0102411	Co-expression	Ceroi-Saas-2016
CDK4	PARP1	0.00234327	Co-expression	Ceroi-Saas-2016
MAP2K1	PIK3CD	0.0189619	Co-expression	Ceroi-Saas-2016
PARP3	MAPK3	0.0145401	Co-expression	Ceroi-Saas-2016
MYC	PTGS2	0.0171064	Co-expression	Swan-Spiller-2013
NFKBIZ	STAT3	0.0277758	Co-expression	Swan-Spiller-2013
BCL2	JAK1	0.0105988	Co-expression	Agnelli-Neri-2009
PARP1	PARP2	0.00578428	Co-expression	Agnelli-Neri-2009
PIK3R1	JAK1	0.0103111	Co-expression	Agnelli-Neri-2009
RAF1	STAT3	0.011604	Co-expression	Agnelli-Neri-2009
MYC	STAT3	0.0133404	Co-expression	Melis-Farci-2014
CDK4	PARP2	0.00677935	Co-expression	Melis-Farci-2014
CDK4	PARP1	0.00222254	Co-expression	Melis-Farci-2014
MAP2K1	MYC	0.00512646	Co-expression	Melis-Farci-2014
MAP2K1	NFKBIZ	0.00307925	Co-expression	Melis-Farci-2014
PIK3CA	JAK1	0.01294	Co-expression	Elashoff-Topol-2011 C
PIK3CD	STAT3	0.0164821	Co-expression	Elashoff-Topol-2011 C
RAF1	STAT3	0.0133207	Co-expression	Elashoff-Topol-2011 C
RAF1	PIK3CD	0.0134556	Co-expression	Elashoff-Topol-2011 C
FER	PIK3R1	0.0175971	Co-expression	Elashoff-Topol-2011 C
PIK3CA	JAK1	0.00929832	Co-expression	Zangrando-Basso-2009
KRAS	PIK3CA	0.00721236	Co-expression	Zangrando-Basso-2009
PIK3R1	PIK3CA	0.00732971	Co-expression	Zangrando-Basso-2009
PIK3R3	PARP1	0.0085174	Co-expression	Zangrando-Basso-2009
RAF1	BRAF	0.0121287	Co-expression	Zangrando-Basso-2009
HDAC6	PTGES2	0.0124753	Co-expression	Zangrando-Basso-2009
HDAC6	PORCN	0.0104484	Co-expression	Zangrando-Basso-2009
ZNF467	MAPK3	0.0140989	Co-expression	Zangrando-Basso-2009
KRAS	PTGS2	0.0126541	Co-expression	Levy-Hessner-2012 B
NFKBIZ	PTGS2	0.0067478	Co-expression	Levy-Hessner-2012 B
NFKBIZ	KRAS	0.014424	Co-expression	Levy-Hessner-2012 B
PIK3R1	JAK1	0.0112847	Co-expression	Levy-Hessner-2012 B
PIK3R1	PTGS2	0.00497506	Co-expression	Levy-Hessner-2012 B
PIK3R1	NFKBIZ	0.0048503	Co-expression	Levy-Hessner-2012 B
MAPK3	PIK3R3	0.0143461	Co-expression	Levy-Hessner-2012 B
MYC	BAX	0.0176355	Co-expression	Popovici-Pusztai-2010 A
CDK4	MYC	0.01519	Co-expression	Popovici-Pusztai-2010 A
MAP2K1	RAF1	0.0155356	Co-expression	Popovici-Pusztai-2010 A
RRM2	PARP2	0.00836766	Co-expression	Popovici-Pusztai-2010 A
KRAS	BRAF	0.0228075	Co-expression	Xiao-Tompkins-2011
CDK4	PARP2	0.00702375	Co-expression	Xiao-Tompkins-2011
CDK4	PARP1	0.00245637	Co-expression	Xiao-Tompkins-2011
PARP3	PTGES2	0.0118036	Co-expression	Xiao-Tompkins-2011
BRAF	STAT	0.0137022	Co-expression	Warren-Tompkins-2009
CDK4	PARP1	0.00329307	Co-expression	Warren-Tompkins-2009
PIK3R1	JAK1	0.013384	Co-expression	Warren-Tompkins-2009
WNT7B	PTGES2	0.0129431	Co-expression	Warren-Tompkins-2009
FER	PARP1	0.00586009	Co-expression	Warren-Tompkins-2009
PARP3	MAPK3	0.00776928	Co-expression	Warren-Tompkins-2009
STAT3	JAK1	0.00619696	Co-expression	Spira-Brody-2007
PIK3CA	MAPK1	0.00599323	Co-expression	Spira-Brody-2007
MYC	PIK3CA	0.00487068	Co-expression	Spira-Brody-2007
RAF1	JAK1	0.00294482	Co-expression	Spira-Brody-2007
STAT3	JAK1	0.0114405	Co-expression	Potti-Nevins-2006
PIK3CA	MAPK1	0.00661046	Co-expression	Potti-Nevins-2006
FGFR2	WNT1	0.006084	Co-expression	Potti-Nevins-2006
HDAC6	WNT1	0.00745774	Co-expression	Potti-Nevins-2006
PIK3CA	BRAF	0.0124551	Co-expression	Winter-Larson-2007
CDK4	PARP1	0.00492752	Co-expression	Winter-Larson-2007
HDAC6	PTGES2	0.0140144	Co-expression	Winter-Larson-2007
PARP3	WNT1	0.025634	Co-expression	Winter-Larson-2007
STAT3	MUC1	0.00813712	Co-expression	Feng-Cheng-2014
EGFR	MUC1	0.00462505	Co-expression	Feng-Cheng-2014
NFKBIZ	PTGS2	0.0157717	Co-expression	Feng-Cheng-2014
CDK4	PARP1	0.00793646	Co-expression	Feng-Cheng-2014
MAP2K1	MAPK1	0.0113272	Co-expression	Feng-Cheng-2014
MAPK3	ARAF	0.0146925	Co-expression	Feng-Cheng-2014
STAT3	JAK1	0.0191799	Co-localization	Johnson-Shoemaker-2003
STAT3	PTGS2	0.0175103	Co-localization	Johnson-Shoemaker-2003
NFKBIZ	PTGS2	0.0195762	Co-localization	Johnson-Shoemaker-2003
NFKBIZ	STAT3	0.0194228	Co-localization	Johnson-Shoemaker-2003
PIK3R3	BRAF	0.0171709	Co-localization	Johnson-Shoemaker-2003
PORCN	STAT	0.0104789	Co-localization	Johnson-Shoemaker-2003
PIK3CA	BRAF	0.168154	Genetic Interactions	Shen-Mali-2017
EGFR	BRAF	0.520936	Genetic Interactions	Shen-Mali-2017
CDK4	BCL2	0.507455	Genetic Interactions	Shen-Mali-2017
BRCA2	BRAF	0.156858	Genetic Interactions	Shen-Mali-2017
FGFR2	BRAF	0.275537	Genetic Interactions	Shen-Mali-2017
RRM2	PARP1	0.20916	Genetic Interactions	Shen-Mali-2017
RRM2	PIK3CA	0.129035	Genetic Interactions	Shen-Mali-2017
HDAC6	PIK3CA	0.234939	Genetic Interactions	Shen-Mali-2017
HDAC6	BRCA2	0.219156	Genetic Interactions	Shen-Mali-2017
BRAF	MAPK1	0.325303	Genetic Interactions	BIOGRID-SMALL-SCALE-STUDIES
KRAS	MAPK1	0.11964	Genetic Interactions	BIOGRID-SMALL-SCALE-STUDIES
KRAS	PIK3CA	0.336718	Genetic Interactions	BIOGRID-SMALL-SCALE-STUDIES
EGFR	KRAS	0.217703	Genetic Interactions	BIOGRID-SMALL-SCALE-STUDIES
NFKBIZ	STAT3	1	Genetic Interactions	BIOGRID-SMALL-SCALE-STUDIES
BRCA2	PARP2	0.29216	Genetic Interactions	BIOGRID-SMALL-SCALE-STUDIES
BRCA2	PARP1	0.29216	Genetic Interactions	BIOGRID-SMALL-SCALE-STUDIES
RAF1	KRAS	0.184546	Genetic Interactions	BIOGRID-SMALL-SCALE-STUDIES
MAP2K1	BRAF	0.373002	Genetic Interactions	BIOGRID-SMALL-SCALE-STUDIES
SEPTIN7	BAX	0.55051	Genetic Interactions	BIOGRID-SMALL-SCALE-STUDIES
MAPK3	BRAF	0.66162	Genetic Interactions	BIOGRID-SMALL-SCALE-STUDIES
ITLN1	BCL2	0.475672	Genetic Interactions	BIOGRID-SMALL-SCALE-STUDIES
KRAS	JAK1	0.0562544	Genetic Interactions	Luo-Elledge-2009
STAT3	BCL2	0.133857	Genetic Interactions	IREF-SMALL-SCALE-STUDIES
STAT3	MUC1	0.000290249	Genetic Interactions	Lin-Smith-2010
STAT3	PTGS2	0.000688582	Genetic Interactions	Lin-Smith-2010
MAPK1	PARP2	0.00114185	Genetic Interactions	Lin-Smith-2010
MAPK1	STAT3	0.000685253	Genetic Interactions	Lin-Smith-2010
BRAF	MUC1	0.000303411	Genetic Interactions	Lin-Smith-2010
BRAF	PARP2	0.00107594	Genetic Interactions	Lin-Smith-2010
BRAF	STAT3	0.000645698	Genetic Interactions	Lin-Smith-2010
BRAF	MAPK1	0.000716328	Genetic Interactions	Lin-Smith-2010
PARP1	BCL2	0.000871549	Genetic Interactions	Lin-Smith-2010
PARP1	MAPK1	0.000914407	Genetic Interactions	Lin-Smith-2010
PIK3CA	WNT6	0.00449139	Genetic Interactions	Lin-Smith-2010
PIK3CA	BCL2	0.00129783	Genetic Interactions	Lin-Smith-2010
PIK3CA	PARP1	0.00163784	Genetic Interactions	Lin-Smith-2010
KRAS	BAX	0.000826232	Genetic Interactions	Lin-Smith-2010
EGFR	PTGS2	0.000513927	Genetic Interactions	Lin-Smith-2010
EGFR	BAX	0.000516018	Genetic Interactions	Lin-Smith-2010
EGFR	STAT3	0.000461014	Genetic Interactions	Lin-Smith-2010
EGFR	KRAS	0.00055093	Genetic Interactions	Lin-Smith-2010
PIK3CD	MUC1	0.000225187	Genetic Interactions	Lin-Smith-2010
PIK3CD	BAX	0.000536404	Genetic Interactions	Lin-Smith-2010
PIK3CD	STAT3	0.000479227	Genetic Interactions	Lin-Smith-2010
PIK3CD	KRAS	0.000572695	Genetic Interactions	Lin-Smith-2010
PIK3CD	EGFR	0.000357673	Genetic Interactions	Lin-Smith-2010
NFKBIZ	MUC1	0.000313463	Genetic Interactions	Lin-Smith-2010
NFKBIZ	STAT3	0.00066709	Genetic Interactions	Lin-Smith-2010
PIK3R1	MUC1	0.000188174	Genetic Interactions	Lin-Smith-2010
PIK3R1	STAT3	0.000400458	Genetic Interactions	Lin-Smith-2010
PIK3R1	EGFR	0.000298884	Genetic Interactions	Lin-Smith-2010
PIK3R1	MYC	0.00070467	Genetic Interactions	Lin-Smith-2010
PIK3R1	PIK3CD	0.000310692	Genetic Interactions	Lin-Smith-2010
PIK3R3	MUC1	0.000322793	Genetic Interactions	Lin-Smith-2010
PIK3R3	BAX	0.000768906	Genetic Interactions	Lin-Smith-2010
FGFR2	STAT	0.000513515	Genetic Interactions	Lin-Smith-2010
FGFR2	MAPK1	0.000401619	Genetic Interactions	Lin-Smith-2010
FGFR2	PIK3R1	0.000234704	Genetic Interactions	Lin-Smith-2010
FGFR2	PIK3R3	0.000402611	Genetic Interactions	Lin-Smith-2010
SEPTIN7	MUC1	0.000657776	Genetic Interactions	Lin-Smith-2010
SEPTIN7	BRAF	0.00146331	Genetic Interactions	Lin-Smith-2010
SEPTIN7	PIK3R1	0.000907539	Genetic Interactions	Lin-Smith-2010
MAPK3	PIK3R1	0.000845734	Genetic Interactions	Lin-Smith-2010
FER	MUC1	0.000189912	Genetic Interactions	Lin-Smith-2010
FER	PTGS2	0.000450544	Genetic Interactions	Lin-Smith-2010
FER	EGFR	0.000301645	Genetic Interactions	Lin-Smith-2010
FER	PIK3CD	0.000313562	Genetic Interactions	Lin-Smith-2010
FER	PIK3R1	0.000262023	Genetic Interactions	Lin-Smith-2010
FER	PIK3R3	0.000449474	Genetic Interactions	Lin-Smith-2010
FER	BRCA2	0.000822493	Genetic Interactions	Lin-Smith-2010
ITLN1	MAPK1	0.00196829	Genetic Interactions	Lin-Smith-2010
ZNF467	JAK1	0.00141567	Genetic Interactions	Lin-Smith-2010
ZNF467	PIK3R3	0.00081468	Genetic Interactions	Lin-Smith-2010
EGFR	PIK3CA	0.117552	Pathway	REACTOME
BRCA2	CDK4	0.0389538	Pathway	REACTOME
MAP2K1	RAF1	0.299855	Pathway	REACTOME
MAPK3	MAP2K1	0.530263	Pathway	REACTOME
EGFR	MAPK1	0.165356	Pathway	CELL_MAP
PIK3R3	PIK3CA	0.201276	Pathway	CELL_MAP
MAP2K1	EGFR	0.125417	Pathway	CELL_MAP
BCL2	JAK1	0.00642699	Pathway	Wu-Stein-2010
BCL2	BAX	0.0317577	Pathway	Wu-Stein-2010
STAT3	MUC1	0.0324665	Pathway	Wu-Stein-2010
STAT3	JAK1	0.00264092	Pathway	Wu-Stein-2010
MAPK1	JAK1	0.0024353	Pathway	Wu-Stein-2010
MAPK1	BCL2	0.00479469	Pathway	Wu-Stein-2010
MAPK1	STAT3	0.00197019	Pathway	Wu-Stein-2010
PIK3CA	JAK1	0.00205362	Pathway	Wu-Stein-2010
PIK3CA	STAT3	0.00166141	Pathway	Wu-Stein-2010
PIK3CA	MAPK1	0.00153205	Pathway	Wu-Stein-2010
KRAS	JAK1	0.00550374	Pathway	Wu-Stein-2010
KRAS	BRAF	0.0164234	Pathway	Wu-Stein-2010
KRAS	PIK3CA	0.00346241	Pathway	Wu-Stein-2010
EGFR	JAK1	0.00232847	Pathway	Wu-Stein-2010
EGFR	STAT3	0.00188376	Pathway	Wu-Stein-2010
EGFR	MAPK1	0.00173709	Pathway	Wu-Stein-2010
EGFR	PIK3CA	0.00146484	Pathway	Wu-Stein-2010
EGFR	KRAS	0.0039258	Pathway	Wu-Stein-2010
MYC	STAT3	0.00296292	Pathway	Wu-Stein-2010
MYC	MAPK1	0.00273224	Pathway	Wu-Stein-2010
MYC	PIK3CA	0.00230402	Pathway	Wu-Stein-2010
MYC	EGFR	0.00261238	Pathway	Wu-Stein-2010
PIK3CD	JAK1	0.00392963	Pathway	Wu-Stein-2010
PIK3CD	STAT3	0.00317912	Pathway	Wu-Stein-2010
PIK3CD	PIK3CA	0.00247214	Pathway	Wu-Stein-2010
PIK3CD	KRAS	0.00662537	Pathway	Wu-Stein-2010
PIK3CD	EGFR	0.002803	Pathway	Wu-Stein-2010
CDK4	MAPK1	0.0066973	Pathway	Wu-Stein-2010
CDK4	MYC	0.0100719	Pathway	Wu-Stein-2010
PIK3R1	JAK1	0.00220264	Pathway	Wu-Stein-2010
PIK3R1	STAT3	0.00178196	Pathway	Wu-Stein-2010
PIK3R1	MAPK1	0.00164322	Pathway	Wu-Stein-2010
PIK3R1	PIK3CA	0.00138569	Pathway	Wu-Stein-2010
PIK3R1	KRAS	0.00371366	Pathway	Wu-Stein-2010
PIK3R1	EGFR	0.00157114	Pathway	Wu-Stein-2010
PIK3R1	MYC	0.00247121	Pathway	Wu-Stein-2010
PIK3R1	PIK3CD	0.00265153	Pathway	Wu-Stein-2010
PIK3R3	JAK1	0.00469421	Pathway	Wu-Stein-2010
PIK3R3	PIK3CA	0.00295313	Pathway	Wu-Stein-2010
PIK3R3	EGFR	0.00334837	Pathway	Wu-Stein-2010
PIK3R3	PIK3CD	0.00565086	Pathway	Wu-Stein-2010
PIK3R3	PIK3R1	0.00316742	Pathway	Wu-Stein-2010
RAF1	JAK1	0.00487731	Pathway	Wu-Stein-2010
RAF1	MAPK1	0.00363859	Pathway	Wu-Stein-2010
RAF1	BRAF	0.0145541	Pathway	Wu-Stein-2010
RAF1	PIK3CA	0.00306832	Pathway	Wu-Stein-2010
RAF1	KRAS	0.00822315	Pathway	Wu-Stein-2010
RAF1	EGFR	0.00347897	Pathway	Wu-Stein-2010
RAF1	PIK3R1	0.00329097	Pathway	Wu-Stein-2010
ARAF	BRAF	0.060379	Pathway	Wu-Stein-2010
ARAF	KRAS	0.0341144	Pathway	Wu-Stein-2010
ARAF	RAF1	0.0302315	Pathway	Wu-Stein-2010
FGFR2	PIK3CA	0.00369702	Pathway	Wu-Stein-2010
FGFR2	KRAS	0.00990805	Pathway	Wu-Stein-2010
FGFR2	PIK3CD	0.00707428	Pathway	Wu-Stein-2010
FGFR2	PIK3R1	0.00396528	Pathway	Wu-Stein-2010
FGFR2	PIK3R3	0.0084507	Pathway	Wu-Stein-2010
PORCN	WNT6	0.0430888	Pathway	Wu-Stein-2010
PORCN	WNT1	0.033643	Pathway	Wu-Stein-2010
MAP2K1	JAK1	0.00555855	Pathway	Wu-Stein-2010
MAP2K1	STAT3	0.00449693	Pathway	Wu-Stein-2010
MAP2K1	MAPK1	0.00414681	Pathway	Wu-Stein-2010
MAP2K1	BRAF	0.016587	Pathway	Wu-Stein-2010
MAP2K1	PIK3CA	0.00349689	Pathway	Wu-Stein-2010
MAP2K1	KRAS	0.00937172	Pathway	Wu-Stein-2010
MAP2K1	EGFR	0.0039649	Pathway	Wu-Stein-2010
MAP2K1	PIK3CD	0.00669135	Pathway	Wu-Stein-2010
MAP2K1	PIK3R1	0.00375064	Pathway	Wu-Stein-2010
MAP2K1	RAF1	0.00830504	Pathway	Wu-Stein-2010
MAP2K1	ARAF	0.0344542	Pathway	Wu-Stein-2010
WNT7B	PORCN	0.0454099	Pathway	Wu-Stein-2010
MAPK3	JAK1	0.00228336	Pathway	Wu-Stein-2010
MAPK3	BCL2	0.00449555	Pathway	Wu-Stein-2010
MAPK3	STAT3	0.00184727	Pathway	Wu-Stein-2010
MAPK3	MAPK1	0.00170344	Pathway	Wu-Stein-2010
MAPK3	PIK3CA	0.00143647	Pathway	Wu-Stein-2010
MAPK3	MYC	0.00256177	Pathway	Wu-Stein-2010
MAPK3	PIK3R1	0.0015407	Pathway	Wu-Stein-2010
MAPK3	RAF1	0.00341158	Pathway	Wu-Stein-2010
MAPK3	MAP2K1	0.00388809	Pathway	Wu-Stein-2010
BCL2	BAX	0.102672	Pathway	IMID
KRAS	BRAF	0.1963	Physical Interactions	Li-Fu-2017
EGFR	PIK3CA	0.478322	Physical Interactions	Li-Fu-2017
MYC	PIK3CA	0.0434453	Physical Interactions	Li-Fu-2017
CDK4	MYC	0.0156874	Physical Interactions	Li-Fu-2017
PIK3R1	PIK3CA	0.477535	Physical Interactions	Li-Fu-2017
RAF1	KRAS	0.104828	Physical Interactions	Li-Fu-2017
RAF1	MYC	0.0147082	Physical Interactions	Li-Fu-2017
RAF1	CDK4	0.0209124	Physical Interactions	Li-Fu-2017
ARAF	BRAF	0.0484311	Physical Interactions	Li-Fu-2017
ARAF	PIK3CA	0.0763953	Physical Interactions	Li-Fu-2017
ARAF	KRAS	0.138276	Physical Interactions	Li-Fu-2017
ARAF	MYC	0.0194012	Physical Interactions	Li-Fu-2017
ARAF	CDK4	0.027585	Physical Interactions	Li-Fu-2017
EGFR	MUC1	0.0909091	Physical Interactions	Kotlyar-Jurisica-2015
EGFR	STAT3	0.0909091	Physical Interactions	Kotlyar-Jurisica-2015
PIK3R3	EGFR	0.0909091	Physical Interactions	Kotlyar-Jurisica-2015
RAF1	EGFR	0.0909091	Physical Interactions	Kotlyar-Jurisica-2015
HDAC6	EGFR	0.0909091	Physical Interactions	Kotlyar-Jurisica-2015
BCL2	BAX	0.387079	Physical Interactions	IREF-mppi
MYC	BCL2	0.0397151	Physical Interactions	Zeller-Wei-2006
MYC	STAT3	0.0397151	Physical Interactions	Zeller-Wei-2006
MYC	MAPK1	0.0397151	Physical Interactions	Zeller-Wei-2006
EGFR	STAT3	0.0747435	Physical Interactions	Foerster-Ritter-2013
MYC	PTGES2	0.0695048	Physical Interactions	Koch-Hermeking-2007
RAF1	MYC	0.0695048	Physical Interactions	Koch-Hermeking-2007
EGFR	PARP1	0.0566139	Physical Interactions	Yao-Stagljar-2017 A
MAPK1	BCL2	0.118518	Physical Interactions	IREF-matrixdb
PARP1	MAPK1	0.0496361	Physical Interactions	IREF-matrixdb
EGFR	MUC1	0.00729764	Physical Interactions	IREF-matrixdb
EGFR	STAT3	0.00491771	Physical Interactions	IREF-matrixdb
PIK3R1	EGFR	0.0029629	Physical Interactions	IREF-matrixdb
PIK3R3	EGFR	0.00562251	Physical Interactions	IREF-matrixdb
RAF1	EGFR	0.00864603	Physical Interactions	IREF-matrixdb
MAP2K1	MAPK1	0.0483796	Physical Interactions	IREF-matrixdb
MAPK3	MAPK1	0.0295708	Physical Interactions	IREF-matrixdb
HDAC6	EGFR	0.00902002	Physical Interactions	IREF-matrixdb
KRAS	BRAF	0.116008	Physical Interactions	Kennedy-Kolch-2020 A
RAF1	BRAF	0.00587285	Physical Interactions	Kennedy-Kolch-2020 A
RAF1	KRAS	0.0739499	Physical Interactions	Kennedy-Kolch-2020 A
ARAF	BRAF	0.0116707	Physical Interactions	Kennedy-Kolch-2020 A
ARAF	RAF1	0.0074396	Physical Interactions	Kennedy-Kolch-2020 A
MAP2K1	BRAF	0.00587316	Physical Interactions	Kennedy-Kolch-2020 A
MAP2K1	KRAS	0.0739538	Physical Interactions	Kennedy-Kolch-2020 A
MAP2K1	RAF1	0.00374389	Physical Interactions	Kennedy-Kolch-2020 A
MAP2K1	ARAF	0.00743999	Physical Interactions	Kennedy-Kolch-2020 A
MAPK3	MAPK1	0.0142398	Physical Interactions	Kennedy-Kolch-2020 A
MAPK1	BCL2	0.0381354	Physical Interactions	IREF-innatedb
EGFR	MUC1	0.0599878	Physical Interactions	IREF-innatedb
EGFR	JAK1	0.0224581	Physical Interactions	IREF-innatedb
MYC	MAPK1	0.0367403	Physical Interactions	IREF-innatedb
MAP2K1	BRAF	0.472679	Physical Interactions	IREF-innatedb
MAPK3	MYC	0.0596827	Physical Interactions	IREF-innatedb
MAPK3	MAP2K1	0.0657008	Physical Interactions	IREF-innatedb
KRAS	BRAF	0.208477	Physical Interactions	Huttlin-Harper-2017
PIK3R3	PIK3CA	0.0692513	Physical Interactions	Huttlin-Harper-2017
PIK3R3	PIK3CD	0.440938	Physical Interactions	Huttlin-Harper-2017
PIK3R3	PIK3R1	0.0708189	Physical Interactions	Huttlin-Harper-2017
RAF1	BRAF	0.368474	Physical Interactions	Huttlin-Harper-2017
ARAF	BRAF	0.24929	Physical Interactions	Huttlin-Harper-2017
MAP2K1	BRAF	0.0874251	Physical Interactions	Huttlin-Harper-2017
MYC	MAPK1	0.0272468	Physical Interactions	Heidelberger-Beli-2018
MYC	PARP1	0.0272468	Physical Interactions	Heidelberger-Beli-2018
RRM2	MYC	0.0272468	Physical Interactions	Heidelberger-Beli-2018
HDAC6	MYC	0.0272468	Physical Interactions	Heidelberger-Beli-2018
MAPK1	BCL2	0.0307804	Physical Interactions	IREF-mint
EGFR	MUC1	0.0602303	Physical Interactions	IREF-mint
EGFR	STAT3	0.0115677	Physical Interactions	IREF-mint
PIK3R1	PIK3CA	0.0173727	Physical Interactions	IREF-mint
PIK3R1	EGFR	0.0037637	Physical Interactions	IREF-mint
PIK3R3	EGFR	0.00957141	Physical Interactions	IREF-mint
RAF1	BRAF	0.0315686	Physical Interactions	IREF-mint
ARAF	PIK3R1	0.0931909	Physical Interactions	IREF-mint
MAP2K1	BAX	0.0390686	Physical Interactions	IREF-mint
MAP2K1	MAPK1	0.0268145	Physical Interactions	IREF-mint
MAP2K1	PIK3CA	0.0389364	Physical Interactions	IREF-mint
MAP2K1	RAF1	0.0275615	Physical Interactions	IREF-mint
MAPK3	MAP2K1	0.0253754	Physical Interactions	IREF-mint
KRAS	BRAF	0.414214	Predicted	I2D-Formstecher-Daviet-2005-Head-Fly2Human
PIK3CD	KRAS	0.643594	Predicted	I2D-Formstecher-Daviet-2005-Head-Fly2Human
BCL2	BAX	0.796225	Predicted	I2D-MGI-Mouse2Human
PIK3R3	PIK3CA	1	Predicted	I2D-MGI-Mouse2Human
RAF1	MAPK1	0.476741	Predicted	I2D-MGI-Mouse2Human
PORCN	WNT6	0.333333	Predicted	I2D-MGI-Mouse2Human
PORCN	WNT1	0.333333	Predicted	I2D-MGI-Mouse2Human
WNT7B	PORCN	0.333333	Predicted	I2D-MGI-Mouse2Human
MAPK3	RAF1	0.476741	Predicted	I2D-MGI-Mouse2Human
FER	STAT3	0.707107	Predicted	I2D-MGI-Mouse2Human
ZNF467	STAT3	0.707107	Predicted	I2D-MGI-Mouse2Human
WNT1	WNT6	0.126617	Predicted	I2D-BioGRID-Fly2Human
BRAF	WNT1	0.0310203	Predicted	I2D-BioGRID-Fly2Human
BRAF	MAPK1	0.0486153	Predicted	I2D-BioGRID-Fly2Human
KRAS	WNT1	0.0119949	Predicted	I2D-BioGRID-Fly2Human
KRAS	MAPK1	0.0187986	Predicted	I2D-BioGRID-Fly2Human
KRAS	BRAF	0.0182437	Predicted	I2D-BioGRID-Fly2Human
PIK3CD	KRAS	0.0367404	Predicted	I2D-BioGRID-Fly2Human
FGFR2	KRAS	0.0955353	Predicted	I2D-BioGRID-Fly2Human
MAP2K1	MAPK1	0.0667501	Predicted	I2D-BioGRID-Fly2Human
MAP2K1	BRAF	0.06478	Predicted	I2D-BioGRID-Fly2Human
MAP2K1	KRAS	0.0250491	Predicted	I2D-BioGRID-Fly2Human
WNT7B	WNT6	0.790412	Predicted	I2D-BioGRID-Fly2Human
SEPTIN7	KRAS	0.0351442	Predicted	I2D-BioGRID-Fly2Human
KRAS	BRAF	0.318518	Predicted	I2D-Formstecher-Daviet-2005-Embryo-Fly2Human
PIK3CD	KRAS	0.709666	Predicted	I2D-Formstecher-Daviet-2005-Embryo-Fly2Human
MAPK1	STAT3	0.180044	Predicted	I2D-BIND-Rat2Human
MAP2K1	MAPK1	0.378273	Predicted	I2D-BIND-Rat2Human
BCL2	BAX	0.707107	Predicted	I2D-MINT-Mouse2Human
PIK3R1	PIK3CA	0.0519644	Predicted	I2D-MINT-Mouse2Human
PIK3R3	PIK3CA	0.52343	Predicted	I2D-MINT-Mouse2Human
RAF1	KRAS	0.317025	Predicted	I2D-MINT-Mouse2Human
ARAF	KRAS	0.335574	Predicted	I2D-MINT-Mouse2Human
MAP2K1	BRAF	0.59928	Predicted	I2D-MINT-Mouse2Human
BRAF	MAPK1	0.0175263	Predicted	Wu-Stein-2010
PARP1	PARP2	0.121717	Predicted	Wu-Stein-2010
KRAS	BCL2	0.0353077	Predicted	Wu-Stein-2010
EGFR	MUC1	0.053365	Predicted	Wu-Stein-2010
MYC	BCL2	0.013177	Predicted	Wu-Stein-2010
RAF1	BCL2	0.0110577	Predicted	Wu-Stein-2010
RAF1	MYC	0.0115452	Predicted	Wu-Stein-2010
ARAF	PIK3R1	0.0187282	Predicted	Wu-Stein-2010
MAP2K1	MYC	0.0166205	Predicted	Wu-Stein-2010
MAPK3	BRAF	0.0235248	Predicted	Wu-Stein-2010
MAPK3	CDK4	0.00481214	Predicted	Wu-Stein-2010
FER	JAK1	0.140966	Predicted	Wu-Stein-2010
FER	STAT3	0.0661622	Predicted	Wu-Stein-2010
PARP3	PARP1	0.335989	Predicted	Wu-Stein-2010
BCL2	BAX	0.160134	Predicted	I2D-IntAct-Mouse2Human
KRAS	PIK3CA	0.0994514	Predicted	I2D-IntAct-Mouse2Human
EGFR	KRAS	0.139949	Predicted	I2D-IntAct-Mouse2Human
PIK3CD	KRAS	0.159374	Predicted	I2D-IntAct-Mouse2Human
PIK3R1	PIK3CA	0.0269327	Predicted	I2D-IntAct-Mouse2Human
PIK3R1	PIK3CD	0.0431605	Predicted	I2D-IntAct-Mouse2Human
PIK3R3	PIK3CA	0.224742	Predicted	I2D-IntAct-Mouse2Human
RAF1	BRAF	0.226048	Predicted	I2D-IntAct-Mouse2Human
MAP2K1	BRAF	0.30029	Predicted	I2D-IntAct-Mouse2Human
KRAS	BRAF	0.32539	Predicted	I2D-MINT-Fly2Human
PIK3CD	KRAS	0.66162	Predicted	I2D-MINT-Fly2Human
MAP2K1	MAPK1	0.64382	Predicted	I2D-MINT-Fly2Human
WNT1	WNT6	0.0573214	Shared protein domains	INTERPRO
BCL2	BAX	0.0845859	Shared protein domains	INTERPRO
PARP1	PARP2	0.152838	Shared protein domains	INTERPRO
PIK3CA	BRAF	0.00574787	Shared protein domains	INTERPRO
EGFR	JAK1	0.0059936	Shared protein domains	INTERPRO
PIK3CD	BRAF	0.00574787	Shared protein domains	INTERPRO
PIK3CD	PIK3CA	0.0916941	Shared protein domains	INTERPRO
CDK4	MAPK1	0.00586885	Shared protein domains	INTERPRO
PIK3R3	STAT3	0.012676	Shared protein domains	INTERPRO
PIK3R3	PIK3R1	0.0361906	Shared protein domains	INTERPRO
RAF1	BRAF	0.0361601	Shared protein domains	INTERPRO
RAF1	PIK3CA	0.00566383	Shared protein domains	INTERPRO
RAF1	PIK3CD	0.00566383	Shared protein domains	INTERPRO
ARAF	BRAF	0.0364888	Shared protein domains	INTERPRO
ARAF	PIK3CA	0.0057153	Shared protein domains	INTERPRO
ARAF	PIK3CD	0.0057153	Shared protein domains	INTERPRO
ARAF	RAF1	0.0359553	Shared protein domains	INTERPRO
FGFR2	JAK1	0.00932781	Shared protein domains	INTERPRO
FGFR2	EGFR	0.0099616	Shared protein domains	INTERPRO
PORCN	STAT	0.0789319	Shared protein domains	INTERPRO
MAP2K1	MAPK1	0.00586885	Shared protein domains	INTERPRO
MAP2K1	CDK4	0.00381781	Shared protein domains	INTERPRO
WNT7B	WNT6	0.0551906	Shared protein domains	INTERPRO
WNT7B	WNT1	0.0551906	Shared protein domains	INTERPRO
MAPK3	MAPK1	0.0296067	Shared protein domains	INTERPRO
MAPK3	CDK4	0.00579666	Shared protein domains	INTERPRO
MAPK3	MAP2K1	0.00579666	Shared protein domains	INTERPRO
FER	JAK1	0.00829006	Shared protein domains	INTERPRO
FER	EGFR	0.00618078	Shared protein domains	INTERPRO
FER	FGFR2	0.00961911	Shared protein domains	INTERPRO
PARP3	PARP2	0.277026	Shared protein domains	INTERPRO
PARP3	PARP1	0.152838	Shared protein domains	INTERPRO
WNT1	WNT6	0.0555556	Shared protein domains	PFAM
BCL2	BAX	0.0896665	Shared protein domains	PFAM
BRAF	JAK1	0.00835643	Shared protein domains	PFAM
PARP1	PARP2	0.13543	Shared protein domains	PFAM
EGFR	JAK1	0.00895479	Shared protein domains	PFAM
EGFR	BRAF	0.00777631	Shared protein domains	PFAM
PIK3CD	PIK3CA	0.126725	Shared protein domains	PFAM
CDK4	MAPK1	0.00328803	Shared protein domains	PFAM
PIK3R1	STAT3	0.00977011	Shared protein domains	PFAM
PIK3R3	STAT3	0.0131273	Shared protein domains	PFAM
PIK3R3	PIK3R1	0.0476924	Shared protein domains	PFAM
RAF1	JAK1	0.00834687	Shared protein domains	PFAM
RAF1	BRAF	0.0373135	Shared protein domains	PFAM
RAF1	EGFR	0.00776741	Shared protein domains	PFAM
ARAF	JAK1	0.00835648	Shared protein domains	PFAM
ARAF	BRAF	0.0373565	Shared protein domains	PFAM
ARAF	EGFR	0.00777635	Shared protein domains	PFAM
ARAF	RAF1	0.0373138	Shared protein domains	PFAM
PORCN	STAT	0.1	Shared protein domains	PFAM
MAP2K1	MAPK1	0.00328803	Shared protein domains	PFAM
MAP2K1	CDK4	0.00328803	Shared protein domains	PFAM
WNT7B	WNT6	0.0555556	Shared protein domains	PFAM
WNT7B	WNT1	0.0555556	Shared protein domains	PFAM
MAPK3	MAPK1	0.00284826	Shared protein domains	PFAM
MAPK3	CDK4	0.00284826	Shared protein domains	PFAM
MAPK3	MAP2K1	0.00284826	Shared protein domains	PFAM
PARP3	PARP2	0.215495	Shared protein domains	PFAM
PARP3	PARP1	0.13543	Shared protein domains	PFAM

## Sheet: grp 1-3
Gene 1	Gene 2	Weight	Network group	Network
IL4	IL2	0.0256491	Co-expression	Iqbal-Chan-2010
IL5	IL2	0.019379	Co-expression	Iqbal-Chan-2010
IL5	IL4	0.0118387	Co-expression	Iqbal-Chan-2010
CXCR2	IL12B	0.0143134	Co-expression	Iqbal-Chan-2010
IFNG	IL10	0.0149394	Co-expression	Iqbal-Chan-2010
IL13	IL5	0.0142838	Co-expression	Iqbal-Chan-2010
TNF	IL4	0.014983	Co-expression	Iqbal-Chan-2010
TNF	IFNG	0.0149542	Co-expression	Iqbal-Chan-2010
IL8	IL13	0.0241272	Co-expression	Iqbal-Chan-2010
IL1B	IL8	0.0246651	Co-expression	Iqbal-Chan-2010
IL6	PTGS2	0.0218425	Co-expression	Iqbal-Chan-2010
IL6	IL8	0.0166254	Co-expression	Iqbal-Chan-2010
IL6	IL1B	0.0203452	Co-expression	Iqbal-Chan-2010
NFKB1	IFNG	0.00523719	Co-expression	Iqbal-Chan-2010
NFKB1	TNF	0.00500072	Co-expression	Iqbal-Chan-2010
NFKB1	PTGES2	0.00670353	Co-expression	Iqbal-Chan-2010
CXCL3	PTGS2	0.020234	Co-expression	Iqbal-Chan-2010
CXCL3	IL6	0.0117409	Co-expression	Iqbal-Chan-2010
CXCL2	CXCL3	0.0191543	Co-expression	Iqbal-Chan-2010
CCL4	IFNG	0.0110585	Co-expression	Iqbal-Chan-2010
CCL4	TNF	0.00857396	Co-expression	Iqbal-Chan-2010
CXCL1	IL8	0.024852	Co-expression	Iqbal-Chan-2010
CXCL1	IL1B	0.0253035	Co-expression	Iqbal-Chan-2010
CXCL1	IL6	0.0227256	Co-expression	Iqbal-Chan-2010
CXCL1	CXCL3	0.0156746	Co-expression	Iqbal-Chan-2010
IL9	IL13	0.0212343	Co-expression	Iqbal-Chan-2010
IL10RA	IFNG	0.00550848	Co-expression	Iqbal-Chan-2010
IL10RA	CCL4	0.00539461	Co-expression	Iqbal-Chan-2010
HCAR3	CXCR2	0.0234678	Co-expression	Iqbal-Chan-2010
HCAR3	IL8	0.0193411	Co-expression	Iqbal-Chan-2010
HCAR3	IL1B	0.0241655	Co-expression	Iqbal-Chan-2010
HCAR3	CXCL1	0.0252492	Co-expression	Iqbal-Chan-2010
CCL20	NFKB1	0.00671702	Co-expression	Iqbal-Chan-2010
OSM	IL9	0.0250092	Co-expression	Iqbal-Chan-2010
BCL2A1	IFNG	0.00767529	Co-expression	Iqbal-Chan-2010
BCL2A1	TNF	0.00807981	Co-expression	Iqbal-Chan-2010
BCL2A1	CCL4	0.00676031	Co-expression	Iqbal-Chan-2010
BCL2A1	IL10RA	0.00479229	Co-expression	Iqbal-Chan-2010
BCL2A1	TNFAIP3	0.00596836	Co-expression	Iqbal-Chan-2010
TNFAIP6	IL8	0.0170052	Co-expression	Iqbal-Chan-2010
TNFAIP6	PROK2	0.0114315	Co-expression	Iqbal-Chan-2010
IL10	IL17	0.0161577	Co-expression	Wang-McClelland-2010 A
IFNG	IL10	0.0148251	Co-expression	Wang-McClelland-2010 A
IL13	IL5	0.0117248	Co-expression	Wang-McClelland-2010 A
TNF	IL10	0.0152187	Co-expression	Wang-McClelland-2010 A
TNF	IFNG	0.0300989	Co-expression	Wang-McClelland-2010 A
TNF	PTGS2	0.0190486	Co-expression	Wang-McClelland-2010 A
IL8	IL10	0.00926671	Co-expression	Wang-McClelland-2010 A
IL8	IFNG	0.0111536	Co-expression	Wang-McClelland-2010 A
IL8	PTGS2	0.00984416	Co-expression	Wang-McClelland-2010 A
IL8	TNF	0.0116561	Co-expression	Wang-McClelland-2010 A
IL1B	IFNG	0.0134743	Co-expression	Wang-McClelland-2010 A
IL1B	PTGS2	0.0125016	Co-expression	Wang-McClelland-2010 A
IL1B	TNF	0.0198116	Co-expression	Wang-McClelland-2010 A
IL1B	IL8	0.00927643	Co-expression	Wang-McClelland-2010 A
IL6	IL10	0.00517316	Co-expression	Wang-McClelland-2010 A
IL6	IFNG	0.00640794	Co-expression	Wang-McClelland-2010 A
IL6	PTGS2	0.00620965	Co-expression	Wang-McClelland-2010 A
IL6	IL8	0.00472046	Co-expression	Wang-McClelland-2010 A
IL6	IL1B	0.00545832	Co-expression	Wang-McClelland-2010 A
CXCR1	IL17	0.0178505	Co-expression	Wang-McClelland-2010 A
CXCR1	CXCR2	0.0193454	Co-expression	Wang-McClelland-2010 A
CXCR1	IL8	0.00820586	Co-expression	Wang-McClelland-2010 A
CXCR1	IL6	0.00446291	Co-expression	Wang-McClelland-2010 A
CXCL3	IL10	0.0124421	Co-expression	Wang-McClelland-2010 A
CXCL3	IFNG	0.0141479	Co-expression	Wang-McClelland-2010 A
CXCL3	TNF	0.0172631	Co-expression	Wang-McClelland-2010 A
CXCL3	IL8	0.0114176	Co-expression	Wang-McClelland-2010 A
CXCL3	IL1B	0.0107223	Co-expression	Wang-McClelland-2010 A
CXCL3	IL6	0.00498895	Co-expression	Wang-McClelland-2010 A
CXCL2	IL10	0.0157211	Co-expression	Wang-McClelland-2010 A
CXCL2	TNF	0.0206871	Co-expression	Wang-McClelland-2010 A
CXCL2	IL8	0.0145916	Co-expression	Wang-McClelland-2010 A
CXCL2	IL1B	0.014173	Co-expression	Wang-McClelland-2010 A
CXCL2	IL6	0.00734017	Co-expression	Wang-McClelland-2010 A
CXCL2	CXCL3	0.0196909	Co-expression	Wang-McClelland-2010 A
CCL4	IFNG	0.0169462	Co-expression	Wang-McClelland-2010 A
CCL4	PTGS2	0.0101481	Co-expression	Wang-McClelland-2010 A
CCL4	TNF	0.0142973	Co-expression	Wang-McClelland-2010 A
CCL4	IL8	0.00765839	Co-expression	Wang-McClelland-2010 A
CCL4	IL1B	0.00958494	Co-expression	Wang-McClelland-2010 A
CCL4	IL6	0.00453811	Co-expression	Wang-McClelland-2010 A
CCL4	CXCL2	0.0114971	Co-expression	Wang-McClelland-2010 A
CXCL1	IL8	0.00817229	Co-expression	Wang-McClelland-2010 A
CXCL1	CXCL3	0.0126022	Co-expression	Wang-McClelland-2010 A
CXCL1	CXCL2	0.0133331	Co-expression	Wang-McClelland-2010 A
IL10RA	IL10	0.00462972	Co-expression	Wang-McClelland-2010 A
HCAR3	CXCR2	0.0140513	Co-expression	Wang-McClelland-2010 A
HCAR3	CXCL1	0.00945734	Co-expression	Wang-McClelland-2010 A
CCL20	IL10	0.0106342	Co-expression	Wang-McClelland-2010 A
CCL20	IL8	0.00824642	Co-expression	Wang-McClelland-2010 A
CCL20	CXCL3	0.012606	Co-expression	Wang-McClelland-2010 A
CCL20	CXCL2	0.0143563	Co-expression	Wang-McClelland-2010 A
CCL20	CXCL1	0.0106276	Co-expression	Wang-McClelland-2010 A
PROK2	IL17	0.0116053	Co-expression	Wang-McClelland-2010 A
PROK2	IL10	0.0101653	Co-expression	Wang-McClelland-2010 A
PROK2	CXCR2	0.0164201	Co-expression	Wang-McClelland-2010 A
PROK2	CXCR1	0.0135031	Co-expression	Wang-McClelland-2010 A
OSM	IL5	0.0181668	Co-expression	Wang-McClelland-2010 A
OSM	IL13	0.0132564	Co-expression	Wang-McClelland-2010 A
OSM	IL8	0.0123905	Co-expression	Wang-McClelland-2010 A
OSM	IL6	0.00707272	Co-expression	Wang-McClelland-2010 A
OSM	CCL4	0.012978	Co-expression	Wang-McClelland-2010 A
TNFAIP3	IL10	0.00759456	Co-expression	Wang-McClelland-2010 A
TNFAIP3	PTGS2	0.008825	Co-expression	Wang-McClelland-2010 A
TNFAIP3	TNF	0.0102966	Co-expression	Wang-McClelland-2010 A
TNFAIP3	IL8	0.00651947	Co-expression	Wang-McClelland-2010 A
TNFAIP3	IL1B	0.00759701	Co-expression	Wang-McClelland-2010 A
TNFAIP3	IL6	0.00392211	Co-expression	Wang-McClelland-2010 A
TNFAIP3	CXCL3	0.00791045	Co-expression	Wang-McClelland-2010 A
TNFAIP3	CXCL2	0.0112276	Co-expression	Wang-McClelland-2010 A
TNFAIP3	CXCL1	0.00624625	Co-expression	Wang-McClelland-2010 A
CSF3	CXCR2	0.00750638	Co-expression	Wang-McClelland-2010 A
CSF3	IL8	0.00555759	Co-expression	Wang-McClelland-2010 A
CSF3	IL6	0.0035858	Co-expression	Wang-McClelland-2010 A
CSF3	CXCR1	0.00716019	Co-expression	Wang-McClelland-2010 A
CSF3	CXCL3	0.00578958	Co-expression	Wang-McClelland-2010 A
CSF3	CXCL2	0.00828975	Co-expression	Wang-McClelland-2010 A
CSF3	PROK2	0.00590206	Co-expression	Wang-McClelland-2010 A
CSF3	TNFAIP3	0.00502991	Co-expression	Wang-McClelland-2010 A
NFKBIA	IL8	0.0096806	Co-expression	Wang-McClelland-2010 A
NFKBIA	IL6	0.00559808	Co-expression	Wang-McClelland-2010 A
NFKBIA	NFKB1	0.011164	Co-expression	Wang-McClelland-2010 A
NFKBIA	TNFAIP3	0.00893096	Co-expression	Wang-McClelland-2010 A
BCL2A1	IL17	0.00631516	Co-expression	Wang-McClelland-2010 A
BCL2A1	IL10	0.00636607	Co-expression	Wang-McClelland-2010 A
BCL2A1	CXCR2	0.00699959	Co-expression	Wang-McClelland-2010 A
BCL2A1	IFNG	0.0073218	Co-expression	Wang-McClelland-2010 A
BCL2A1	IL8	0.00541297	Co-expression	Wang-McClelland-2010 A
BCL2A1	IL1B	0.00559939	Co-expression	Wang-McClelland-2010 A
BCL2A1	IL6	0.00275793	Co-expression	Wang-McClelland-2010 A
BCL2A1	CXCR1	0.00597525	Co-expression	Wang-McClelland-2010 A
BCL2A1	CXCL3	0.00614842	Co-expression	Wang-McClelland-2010 A
BCL2A1	CXCL2	0.00757455	Co-expression	Wang-McClelland-2010 A
BCL2A1	CCL4	0.00477815	Co-expression	Wang-McClelland-2010 A
BCL2A1	CXCL1	0.00473945	Co-expression	Wang-McClelland-2010 A
BCL2A1	CCL20	0.00520585	Co-expression	Wang-McClelland-2010 A
BCL2A1	PROK2	0.00546359	Co-expression	Wang-McClelland-2010 A
BCL2A1	TNFAIP3	0.00421374	Co-expression	Wang-McClelland-2010 A
BCL2A1	NFKBIA	0.00607616	Co-expression	Wang-McClelland-2010 A
TNFAIP6	CXCR2	0.00815729	Co-expression	Wang-McClelland-2010 A
TNFAIP6	IL6	0.00319576	Co-expression	Wang-McClelland-2010 A
TNFAIP6	CXCR1	0.00685333	Co-expression	Wang-McClelland-2010 A
TNFAIP6	PROK2	0.00618484	Co-expression	Wang-McClelland-2010 A
TNFAIP6	TNFAIP3	0.00456909	Co-expression	Wang-McClelland-2010 A
TNFAIP6	CSF3	0.00469561	Co-expression	Wang-McClelland-2010 A
IL10	IL17	0.0232933	Co-expression	Arijs-Rutgeerts-2009
IFNG	IL12B	0.0198887	Co-expression	Arijs-Rutgeerts-2009
PTGS2	CXCR2	0.00603141	Co-expression	Arijs-Rutgeerts-2009
TNF	IL12B	0.0197946	Co-expression	Arijs-Rutgeerts-2009
TNF	CXCR2	0.00870071	Co-expression	Arijs-Rutgeerts-2009
TNF	PTGS2	0.0130503	Co-expression	Arijs-Rutgeerts-2009
IL8	IL17	0.00845236	Co-expression	Arijs-Rutgeerts-2009
IL8	CXCR2	0.00458657	Co-expression	Arijs-Rutgeerts-2009
IL8	IFNG	0.00756461	Co-expression	Arijs-Rutgeerts-2009
IL8	PTGS2	0.00639907	Co-expression	Arijs-Rutgeerts-2009
IL8	TNF	0.00950537	Co-expression	Arijs-Rutgeerts-2009
IL1B	CXCR2	0.00482984	Co-expression	Arijs-Rutgeerts-2009
IL1B	PTGS2	0.00678753	Co-expression	Arijs-Rutgeerts-2009
IL1B	TNF	0.0103534	Co-expression	Arijs-Rutgeerts-2009
IL1B	IL8	0.00522344	Co-expression	Arijs-Rutgeerts-2009
IL6	CXCR2	0.00749387	Co-expression	Arijs-Rutgeerts-2009
IL6	PTGS2	0.0119898	Co-expression	Arijs-Rutgeerts-2009
IL6	TNF	0.0203847	Co-expression	Arijs-Rutgeerts-2009
IL6	IL8	0.00843675	Co-expression	Arijs-Rutgeerts-2009
IL6	IL1B	0.00871166	Co-expression	Arijs-Rutgeerts-2009
CXCR1	CXCR2	0.00695074	Co-expression	Arijs-Rutgeerts-2009
CXCR1	TNF	0.0132393	Co-expression	Arijs-Rutgeerts-2009
CXCR1	IL8	0.00677206	Co-expression	Arijs-Rutgeerts-2009
CXCR1	IL1B	0.00730849	Co-expression	Arijs-Rutgeerts-2009
NFKB1	IL1B	0.00607176	Co-expression	Arijs-Rutgeerts-2009
CXCL2	CXCL3	0.0110144	Co-expression	Arijs-Rutgeerts-2009
CCL4	IL12B	0.0130857	Co-expression	Arijs-Rutgeerts-2009
CCL4	CXCR2	0.00676776	Co-expression	Arijs-Rutgeerts-2009
CCL4	PTGS2	0.00959527	Co-expression	Arijs-Rutgeerts-2009
CCL4	TNF	0.0169061	Co-expression	Arijs-Rutgeerts-2009
CCL4	IL8	0.00775115	Co-expression	Arijs-Rutgeerts-2009
CCL4	IL1B	0.0083052	Co-expression	Arijs-Rutgeerts-2009
CCL4	IL6	0.013632	Co-expression	Arijs-Rutgeerts-2009
CCL4	CXCR1	0.0105026	Co-expression	Arijs-Rutgeerts-2009
CXCL1	IL17	0.00834627	Co-expression	Arijs-Rutgeerts-2009
CXCL1	CXCL3	0.00346984	Co-expression	Arijs-Rutgeerts-2009
CXCL1	CXCL2	0.00957354	Co-expression	Arijs-Rutgeerts-2009
HCAR3	CXCR2	0.00682701	Co-expression	Arijs-Rutgeerts-2009
HCAR3	IFNG	0.0119315	Co-expression	Arijs-Rutgeerts-2009
HCAR3	IL8	0.00765483	Co-expression	Arijs-Rutgeerts-2009
HCAR3	IL1B	0.00794074	Co-expression	Arijs-Rutgeerts-2009
HCAR3	CXCR1	0.010603	Co-expression	Arijs-Rutgeerts-2009
HCAR3	CCL4	0.0120723	Co-expression	Arijs-Rutgeerts-2009
NLRP7	IL10RA	0.00358492	Co-expression	Arijs-Rutgeerts-2009
IL1A	CXCR2	0.00882198	Co-expression	Arijs-Rutgeerts-2009
IL1A	PTGS2	0.0132188	Co-expression	Arijs-Rutgeerts-2009
IL1A	TNF	0.0237524	Co-expression	Arijs-Rutgeerts-2009
IL1A	IL8	0.00986227	Co-expression	Arijs-Rutgeerts-2009
IL1A	IL1B	0.0111985	Co-expression	Arijs-Rutgeerts-2009
IL1A	IL6	0.0187628	Co-expression	Arijs-Rutgeerts-2009
IL1A	CXCR1	0.0143379	Co-expression	Arijs-Rutgeerts-2009
IL1A	CCL4	0.0164903	Co-expression	Arijs-Rutgeerts-2009
G0S2	CXCR2	0.00569634	Co-expression	Arijs-Rutgeerts-2009
G0S2	PTGS2	0.00816503	Co-expression	Arijs-Rutgeerts-2009
G0S2	TNF	0.0119396	Co-expression	Arijs-Rutgeerts-2009
G0S2	IL8	0.00611984	Co-expression	Arijs-Rutgeerts-2009
G0S2	IL1B	0.00672604	Co-expression	Arijs-Rutgeerts-2009
G0S2	IL6	0.0101805	Co-expression	Arijs-Rutgeerts-2009
G0S2	CXCR1	0.00883727	Co-expression	Arijs-Rutgeerts-2009
G0S2	CCL4	0.00995857	Co-expression	Arijs-Rutgeerts-2009
G0S2	HCAR3	0.00946572	Co-expression	Arijs-Rutgeerts-2009
G0S2	IL1A	0.0129793	Co-expression	Arijs-Rutgeerts-2009
PROK2	IL17	0.0107066	Co-expression	Arijs-Rutgeerts-2009
PROK2	CXCR2	0.00592635	Co-expression	Arijs-Rutgeerts-2009
PROK2	PTGS2	0.00766537	Co-expression	Arijs-Rutgeerts-2009
PROK2	IL8	0.00583516	Co-expression	Arijs-Rutgeerts-2009
PROK2	IL1B	0.00603829	Co-expression	Arijs-Rutgeerts-2009
PROK2	CXCR1	0.00824136	Co-expression	Arijs-Rutgeerts-2009
PROK2	G0S2	0.00722461	Co-expression	Arijs-Rutgeerts-2009
OSM	CXCR2	0.00780666	Co-expression	Arijs-Rutgeerts-2009
OSM	PTGS2	0.0114039	Co-expression	Arijs-Rutgeerts-2009
OSM	TNF	0.016825	Co-expression	Arijs-Rutgeerts-2009
OSM	IL8	0.00796199	Co-expression	Arijs-Rutgeerts-2009
OSM	IL1B	0.00873145	Co-expression	Arijs-Rutgeerts-2009
OSM	CXCR1	0.0116376	Co-expression	Arijs-Rutgeerts-2009
OSM	CCL4	0.0129662	Co-expression	Arijs-Rutgeerts-2009
OSM	HCAR3	0.0121141	Co-expression	Arijs-Rutgeerts-2009
OSM	IL1A	0.0165438	Co-expression	Arijs-Rutgeerts-2009
OSM	G0S2	0.0110589	Co-expression	Arijs-Rutgeerts-2009
OSM	PROK2	0.00949035	Co-expression	Arijs-Rutgeerts-2009
TNFAIP3	CXCR2	0.00776906	Co-expression	Arijs-Rutgeerts-2009
TNFAIP3	PTGS2	0.0123313	Co-expression	Arijs-Rutgeerts-2009
TNFAIP3	TNF	0.0186583	Co-expression	Arijs-Rutgeerts-2009
TNFAIP3	IL8	0.00866938	Co-expression	Arijs-Rutgeerts-2009
TNFAIP3	IL1B	0.00931943	Co-expression	Arijs-Rutgeerts-2009
TNFAIP3	IL6	0.016203	Co-expression	Arijs-Rutgeerts-2009
TNFAIP3	CCL4	0.0141426	Co-expression	Arijs-Rutgeerts-2009
TNFAIP3	IL1A	0.0201175	Co-expression	Arijs-Rutgeerts-2009
TNFAIP3	G0S2	0.0112476	Co-expression	Arijs-Rutgeerts-2009
TNFAIP3	OSM	0.014442	Co-expression	Arijs-Rutgeerts-2009
CSF3	PTGS2	0.0079351	Co-expression	Arijs-Rutgeerts-2009
CSF3	TNF	0.0123091	Co-expression	Arijs-Rutgeerts-2009
CSF3	IL6	0.0131869	Co-expression	Arijs-Rutgeerts-2009
NFKBIA	CXCR2	0.00899621	Co-expression	Arijs-Rutgeerts-2009
NFKBIA	PTGS2	0.0147459	Co-expression	Arijs-Rutgeerts-2009
NFKBIA	TNF	0.0228584	Co-expression	Arijs-Rutgeerts-2009
NFKBIA	IL8	0.0107705	Co-expression	Arijs-Rutgeerts-2009
NFKBIA	IL1B	0.0112298	Co-expression	Arijs-Rutgeerts-2009
NFKBIA	IL6	0.0198683	Co-expression	Arijs-Rutgeerts-2009
NFKBIA	CCL4	0.0176756	Co-expression	Arijs-Rutgeerts-2009
NFKBIA	HCAR3	0.0150819	Co-expression	Arijs-Rutgeerts-2009
NFKBIA	CCL20	0.0270219	Co-expression	Arijs-Rutgeerts-2009
NFKBIA	G0S2	0.0130038	Co-expression	Arijs-Rutgeerts-2009
NFKBIA	OSM	0.0170811	Co-expression	Arijs-Rutgeerts-2009
NFKBIA	TNFAIP3	0.0289652	Co-expression	Arijs-Rutgeerts-2009
BCL2A1	CXCR2	0.00412972	Co-expression	Arijs-Rutgeerts-2009
BCL2A1	PTGS2	0.00553258	Co-expression	Arijs-Rutgeerts-2009
BCL2A1	TNF	0.00816746	Co-expression	Arijs-Rutgeerts-2009
BCL2A1	IL8	0.00440923	Co-expression	Arijs-Rutgeerts-2009
BCL2A1	IL1B	0.00466798	Co-expression	Arijs-Rutgeerts-2009
BCL2A1	CXCR1	0.00619933	Co-expression	Arijs-Rutgeerts-2009
BCL2A1	CCL4	0.00674019	Co-expression	Arijs-Rutgeerts-2009
BCL2A1	HCAR3	0.0068406	Co-expression	Arijs-Rutgeerts-2009
BCL2A1	IL1A	0.00872091	Co-expression	Arijs-Rutgeerts-2009
BCL2A1	G0S2	0.00556039	Co-expression	Arijs-Rutgeerts-2009
BCL2A1	PROK2	0.00543424	Co-expression	Arijs-Rutgeerts-2009
BCL2A1	OSM	0.00723752	Co-expression	Arijs-Rutgeerts-2009
BCL2A1	TNFAIP3	0.00776398	Co-expression	Arijs-Rutgeerts-2009
BCL2A1	NFKBIA	0.00932706	Co-expression	Arijs-Rutgeerts-2009
TNFAIP6	IL17	0.0120207	Co-expression	Arijs-Rutgeerts-2009
TNFAIP6	IL10	0.0140485	Co-expression	Arijs-Rutgeerts-2009
TNFAIP6	IFNG	0.0116539	Co-expression	Arijs-Rutgeerts-2009
TNFAIP6	IL8	0.00677506	Co-expression	Arijs-Rutgeerts-2009
TNFAIP6	IL1B	0.00658794	Co-expression	Arijs-Rutgeerts-2009
TNFAIP6	IL6	0.0120179	Co-expression	Arijs-Rutgeerts-2009
TNFAIP6	CCL4	0.0103633	Co-expression	Arijs-Rutgeerts-2009
TNFAIP6	HCAR3	0.0105133	Co-expression	Arijs-Rutgeerts-2009
TNFAIP6	CSF3	0.00826926	Co-expression	Arijs-Rutgeerts-2009
TNFAIP6	BCL2A1	0.00594808	Co-expression	Arijs-Rutgeerts-2009
CXCR2	IL12B	0.00520269	Co-expression	Toedter-Baribaud-2011
IFNG	IL12B	0.0219612	Co-expression	Toedter-Baribaud-2011
IFNG	CXCR2	0.00603424	Co-expression	Toedter-Baribaud-2011
TNF	IL12B	0.0167827	Co-expression	Toedter-Baribaud-2011
TNF	CXCR2	0.00644622	Co-expression	Toedter-Baribaud-2011
TNF	IFNG	0.0157979	Co-expression	Toedter-Baribaud-2011
IL8	IL10	0.0106379	Co-expression	Toedter-Baribaud-2011
IL8	CXCR2	0.00486154	Co-expression	Toedter-Baribaud-2011
IL8	PTGS2	0.00758165	Co-expression	Toedter-Baribaud-2011
IL1B	IL10	0.00682039	Co-expression	Toedter-Baribaud-2011
IL1B	IL12B	0.00469135	Co-expression	Toedter-Baribaud-2011
IL1B	CXCR2	0.00340589	Co-expression	Toedter-Baribaud-2011
IL1B	PTGS2	0.00499739	Co-expression	Toedter-Baribaud-2011
IL1B	TNF	0.00623131	Co-expression	Toedter-Baribaud-2011
IL1B	IL8	0.0052764	Co-expression	Toedter-Baribaud-2011
IL6	IL10	0.013331	Co-expression	Toedter-Baribaud-2011
IL6	PTGS2	0.00813821	Co-expression	Toedter-Baribaud-2011
IL6	IL8	0.00778868	Co-expression	Toedter-Baribaud-2011
IL6	IL1B	0.00555015	Co-expression	Toedter-Baribaud-2011
CXCR1	IL12B	0.00693154	Co-expression	Toedter-Baribaud-2011
CXCR1	CXCR2	0.00447701	Co-expression	Toedter-Baribaud-2011
CXCR1	IFNG	0.00789165	Co-expression	Toedter-Baribaud-2011
CXCR1	PTGS2	0.00552283	Co-expression	Toedter-Baribaud-2011
CXCR1	TNF	0.00796795	Co-expression	Toedter-Baribaud-2011
CXCR1	IL8	0.0058857	Co-expression	Toedter-Baribaud-2011
CXCR1	IL1B	0.00422355	Co-expression	Toedter-Baribaud-2011
NFKB1	TNF	0.0129988	Co-expression	Toedter-Baribaud-2011
CXCL3	IL17	0.0103323	Co-expression	Toedter-Baribaud-2011
CXCL2	CXCL3	0.0150768	Co-expression	Toedter-Baribaud-2011
CCL4	IL12B	0.00760722	Co-expression	Toedter-Baribaud-2011
CCL4	CXCR2	0.00445666	Co-expression	Toedter-Baribaud-2011
CCL4	TNF	0.0103607	Co-expression	Toedter-Baribaud-2011
CCL4	IL1B	0.00448018	Co-expression	Toedter-Baribaud-2011
CCL4	CXCR1	0.00539285	Co-expression	Toedter-Baribaud-2011
CCL4	NFKB1	0.00821173	Co-expression	Toedter-Baribaud-2011
CXCL1	IL17	0.00788968	Co-expression	Toedter-Baribaud-2011
CXCL1	IL10	0.00703795	Co-expression	Toedter-Baribaud-2011
CXCL1	IFNG	0.00642873	Co-expression	Toedter-Baribaud-2011
CXCL1	CXCL3	0.00438407	Co-expression	Toedter-Baribaud-2011
CXCL1	CXCL2	0.00977942	Co-expression	Toedter-Baribaud-2011
HCAR3	IL12B	0.00673723	Co-expression	Toedter-Baribaud-2011
HCAR3	CXCR2	0.00404403	Co-expression	Toedter-Baribaud-2011
HCAR3	IFNG	0.00813856	Co-expression	Toedter-Baribaud-2011
HCAR3	PTGS2	0.00586749	Co-expression	Toedter-Baribaud-2011
HCAR3	TNF	0.00754488	Co-expression	Toedter-Baribaud-2011
HCAR3	IL8	0.00625333	Co-expression	Toedter-Baribaud-2011
HCAR3	IL1B	0.00430519	Co-expression	Toedter-Baribaud-2011
HCAR3	IL6	0.00607288	Co-expression	Toedter-Baribaud-2011
HCAR3	CXCR1	0.00507947	Co-expression	Toedter-Baribaud-2011
HCAR3	CCL4	0.00523978	Co-expression	Toedter-Baribaud-2011
NLRP7	CXCL1	0.0054935	Co-expression	Toedter-Baribaud-2011
IL1A	CXCR2	0.00940587	Co-expression	Toedter-Baribaud-2011
IL1A	CCL4	0.0135055	Co-expression	Toedter-Baribaud-2011
G0S2	CXCR2	0.00321403	Co-expression	Toedter-Baribaud-2011
G0S2	PTGS2	0.00500734	Co-expression	Toedter-Baribaud-2011
G0S2	IL8	0.00502242	Co-expression	Toedter-Baribaud-2011
G0S2	IL1B	0.00347425	Co-expression	Toedter-Baribaud-2011
G0S2	IL6	0.00502851	Co-expression	Toedter-Baribaud-2011
G0S2	CXCR1	0.00396956	Co-expression	Toedter-Baribaud-2011
G0S2	CCL4	0.00424676	Co-expression	Toedter-Baribaud-2011
G0S2	HCAR3	0.00411629	Co-expression	Toedter-Baribaud-2011
PROK2	PTGS2	0.00694483	Co-expression	Toedter-Baribaud-2011
PROK2	IL8	0.00688391	Co-expression	Toedter-Baribaud-2011
PROK2	IL1B	0.00448799	Co-expression	Toedter-Baribaud-2011
PROK2	HCAR3	0.00534565	Co-expression	Toedter-Baribaud-2011
PROK2	G0S2	0.00456552	Co-expression	Toedter-Baribaud-2011
OSM	PTGS2	0.00772527	Co-expression	Toedter-Baribaud-2011
OSM	IL8	0.00704593	Co-expression	Toedter-Baribaud-2011
OSM	IL1B	0.00485173	Co-expression	Toedter-Baribaud-2011
OSM	HCAR3	0.00580716	Co-expression	Toedter-Baribaud-2011
OSM	G0S2	0.00502605	Co-expression	Toedter-Baribaud-2011
OSM	PROK2	0.00679336	Co-expression	Toedter-Baribaud-2011
TNFAIP3	IL10	0.00795166	Co-expression	Toedter-Baribaud-2011
TNFAIP3	PTGS2	0.00525333	Co-expression	Toedter-Baribaud-2011
TNFAIP3	IL1B	0.00374756	Co-expression	Toedter-Baribaud-2011
TNFAIP3	IL6	0.00592032	Co-expression	Toedter-Baribaud-2011
TNFAIP3	NFKB1	0.00667192	Co-expression	Toedter-Baribaud-2011
TNFAIP3	CCL4	0.00494737	Co-expression	Toedter-Baribaud-2011
TNFAIP3	IL1A	0.0106307	Co-expression	Toedter-Baribaud-2011
TNFAIP3	G0S2	0.00358805	Co-expression	Toedter-Baribaud-2011
TNFAIP3	OSM	0.00517467	Co-expression	Toedter-Baribaud-2011
CSF3	IL10	0.00895113	Co-expression	Toedter-Baribaud-2011
CSF3	IL1B	0.00358561	Co-expression	Toedter-Baribaud-2011
CSF3	IL6	0.00775591	Co-expression	Toedter-Baribaud-2011
NFKBIA	CXCR2	0.0096582	Co-expression	Toedter-Baribaud-2011
NFKBIA	PTGS2	0.0149825	Co-expression	Toedter-Baribaud-2011
NFKBIA	IL8	0.0152257	Co-expression	Toedter-Baribaud-2011
NFKBIA	IL1B	0.0107703	Co-expression	Toedter-Baribaud-2011
NFKBIA	CXCR1	0.0119102	Co-expression	Toedter-Baribaud-2011
NFKBIA	CCL4	0.0135288	Co-expression	Toedter-Baribaud-2011
NFKBIA	HCAR3	0.0127451	Co-expression	Toedter-Baribaud-2011
NFKBIA	G0S2	0.0100729	Co-expression	Toedter-Baribaud-2011
NFKBIA	PROK2	0.0129388	Co-expression	Toedter-Baribaud-2011
NFKBIA	OSM	0.0146246	Co-expression	Toedter-Baribaud-2011
NFKBIA	TNFAIP3	0.0119263	Co-expression	Toedter-Baribaud-2011
BCL2A1	CXCR2	0.00296324	Co-expression	Toedter-Baribaud-2011
BCL2A1	PTGS2	0.00460426	Co-expression	Toedter-Baribaud-2011
BCL2A1	IL8	0.00479862	Co-expression	Toedter-Baribaud-2011
BCL2A1	IL1B	0.00323677	Co-expression	Toedter-Baribaud-2011
BCL2A1	IL6	0.00457614	Co-expression	Toedter-Baribaud-2011
BCL2A1	CXCR1	0.00361726	Co-expression	Toedter-Baribaud-2011
BCL2A1	CCL4	0.00393783	Co-expression	Toedter-Baribaud-2011
BCL2A1	HCAR3	0.00389191	Co-expression	Toedter-Baribaud-2011
BCL2A1	IL1A	0.00827187	Co-expression	Toedter-Baribaud-2011
BCL2A1	G0S2	0.00318582	Co-expression	Toedter-Baribaud-2011
BCL2A1	PROK2	0.00420585	Co-expression	Toedter-Baribaud-2011
BCL2A1	OSM	0.00458912	Co-expression	Toedter-Baribaud-2011
BCL2A1	TNFAIP3	0.00346242	Co-expression	Toedter-Baribaud-2011
BCL2A1	NFKBIA	0.00978071	Co-expression	Toedter-Baribaud-2011
TNFAIP6	PTGS2	0.00715871	Co-expression	Toedter-Baribaud-2011
TNFAIP6	IL8	0.00739435	Co-expression	Toedter-Baribaud-2011
TNFAIP6	IL1B	0.00502863	Co-expression	Toedter-Baribaud-2011
TNFAIP6	NFKB1	0.00902193	Co-expression	Toedter-Baribaud-2011
TNFAIP6	HCAR3	0.00591552	Co-expression	Toedter-Baribaud-2011
TNFAIP6	G0S2	0.00495908	Co-expression	Toedter-Baribaud-2011
TNFAIP6	PROK2	0.00642806	Co-expression	Toedter-Baribaud-2011
TNFAIP6	OSM	0.00715007	Co-expression	Toedter-Baribaud-2011
TNFAIP6	TNFAIP3	0.00586843	Co-expression	Toedter-Baribaud-2011
TNFAIP6	NFKBIA	0.0157894	Co-expression	Toedter-Baribaud-2011
TNFAIP6	BCL2A1	0.00479524	Co-expression	Toedter-Baribaud-2011
IL10	IL2	0.0145157	Co-expression	Swan-Spiller-2013
IL12B	IL2	0.0130542	Co-expression	Swan-Spiller-2013
IL12B	IL17	0.0217075	Co-expression	Swan-Spiller-2013
IFNG	IL17	0.0202083	Co-expression	Swan-Spiller-2013
IFNG	IL12B	0.018369	Co-expression	Swan-Spiller-2013
IL8	PTGS2	0.0187669	Co-expression	Swan-Spiller-2013
IL1B	PTGS2	0.0169785	Co-expression	Swan-Spiller-2013
IL1B	IL8	0.022379	Co-expression	Swan-Spiller-2013
IL6	PTGS2	0.0169403	Co-expression	Swan-Spiller-2013
IL6	IL8	0.0236162	Co-expression	Swan-Spiller-2013
IL6	IL1B	0.0168057	Co-expression	Swan-Spiller-2013
CXCR1	CXCR2	0.0218601	Co-expression	Swan-Spiller-2013
NFKB1	IL7	0.0158741	Co-expression	Swan-Spiller-2013
CXCL3	IL17	0.0172882	Co-expression	Swan-Spiller-2013
CXCL3	IL12B	0.015248	Co-expression	Swan-Spiller-2013
CXCL3	IFNG	0.0162765	Co-expression	Swan-Spiller-2013
CXCL2	IL17	0.0198658	Co-expression	Swan-Spiller-2013
CXCL2	IFNG	0.0194502	Co-expression	Swan-Spiller-2013
CXCL2	CXCL3	0.0177385	Co-expression	Swan-Spiller-2013
CCL4	IL10	0.0220955	Co-expression	Swan-Spiller-2013
CCL4	IL8	0.0179726	Co-expression	Swan-Spiller-2013
CCL4	IL1B	0.0174289	Co-expression	Swan-Spiller-2013
CXCL1	IL17	0.0201469	Co-expression	Swan-Spiller-2013
CXCL1	IL12B	0.0176645	Co-expression	Swan-Spiller-2013
CXCL1	IFNG	0.020484	Co-expression	Swan-Spiller-2013
CXCL1	CXCL3	0.0170674	Co-expression	Swan-Spiller-2013
CXCL1	CXCL2	0.021018	Co-expression	Swan-Spiller-2013
HCAR3	IL8	0.0288855	Co-expression	Swan-Spiller-2013
CCL20	IL12B	0.0156816	Co-expression	Swan-Spiller-2013
CCL20	TNF	0.0124878	Co-expression	Swan-Spiller-2013
CCL20	IL1B	0.0150606	Co-expression	Swan-Spiller-2013
NLRP7	IL10RA	0.009655	Co-expression	Swan-Spiller-2013
SHISA2	IL17	0.0161251	Co-expression	Swan-Spiller-2013
SHISA2	IL12B	0.0153422	Co-expression	Swan-Spiller-2013
SHISA2	CXCL1	0.0130111	Co-expression	Swan-Spiller-2013
SHISA2	CCL20	0.0144821	Co-expression	Swan-Spiller-2013
PROK2	CXCR2	0.0257817	Co-expression	Swan-Spiller-2013
PROK2	CXCR1	0.0232934	Co-expression	Swan-Spiller-2013
PROK2	HCAR3	0.0150738	Co-expression	Swan-Spiller-2013
OSM	HCAR3	0.0235877	Co-expression	Swan-Spiller-2013
TNFAIP3	IL1B	0.0104783	Co-expression	Swan-Spiller-2013
TNFAIP3	CCL20	0.0105305	Co-expression	Swan-Spiller-2013
TNFAIP3	IL1A	0.0132299	Co-expression	Swan-Spiller-2013
TNFAIP3	SHISA2	0.0100029	Co-expression	Swan-Spiller-2013
CSF3	IL8	0.0219384	Co-expression	Swan-Spiller-2013
CSF3	IL6	0.0208389	Co-expression	Swan-Spiller-2013
NFKBIA	NFKB1	0.0111582	Co-expression	Swan-Spiller-2013
NFKBIA	CCL4	0.0128108	Co-expression	Swan-Spiller-2013
NFKBIA	IL1A	0.0143628	Co-expression	Swan-Spiller-2013
BCL2A1	TNF	0.011544	Co-expression	Swan-Spiller-2013
TNFAIP6	PTGS2	0.0190725	Co-expression	Swan-Spiller-2013
TNFAIP6	IL8	0.0240252	Co-expression	Swan-Spiller-2013
TNFAIP6	IL1B	0.0173228	Co-expression	Swan-Spiller-2013
TNFAIP6	IL6	0.0278286	Co-expression	Swan-Spiller-2013
TNFAIP6	CSF3	0.0195533	Co-expression	Swan-Spiller-2013
IL13	IL5	0.0370494	Co-expression	Brunner-Guttman-Yassky-2019
TNF	IL12B	0.00935133	Co-expression	Brunner-Guttman-Yassky-2019
IL8	PTGS2	0.0180537	Co-expression	Brunner-Guttman-Yassky-2019
IL1B	IFNG	0.00658042	Co-expression	Brunner-Guttman-Yassky-2019
IL1B	PTGS2	0.0159776	Co-expression	Brunner-Guttman-Yassky-2019
IL1B	IL8	0.0172232	Co-expression	Brunner-Guttman-Yassky-2019
IL6	PTGS2	0.013962	Co-expression	Brunner-Guttman-Yassky-2019
IL6	IL8	0.010982	Co-expression	Brunner-Guttman-Yassky-2019
IL6	IL1B	0.0124581	Co-expression	Brunner-Guttman-Yassky-2019
CXCR1	PTGS2	0.0158633	Co-expression	Brunner-Guttman-Yassky-2019
CXCR1	IL8	0.0119364	Co-expression	Brunner-Guttman-Yassky-2019
CXCR1	IL1B	0.0127071	Co-expression	Brunner-Guttman-Yassky-2019
CXCR1	IL6	0.0102703	Co-expression	Brunner-Guttman-Yassky-2019
CXCL3	PTGS2	0.0171756	Co-expression	Brunner-Guttman-Yassky-2019
CXCL3	IL8	0.0138601	Co-expression	Brunner-Guttman-Yassky-2019
CXCL3	IL1B	0.013084	Co-expression	Brunner-Guttman-Yassky-2019
CXCL3	IL6	0.0123396	Co-expression	Brunner-Guttman-Yassky-2019
CXCL3	CXCR1	0.0104459	Co-expression	Brunner-Guttman-Yassky-2019
CCL4	IFNG	0.00721731	Co-expression	Brunner-Guttman-Yassky-2019
CCL4	IL8	0.00765683	Co-expression	Brunner-Guttman-Yassky-2019
CCL4	IL1B	0.00819808	Co-expression	Brunner-Guttman-Yassky-2019
CCL4	CXCR1	0.00674934	Co-expression	Brunner-Guttman-Yassky-2019
CCL4	CXCL3	0.00648889	Co-expression	Brunner-Guttman-Yassky-2019
CXCL1	IL12B	0.00890057	Co-expression	Brunner-Guttman-Yassky-2019
CXCL1	PTGS2	0.0101566	Co-expression	Brunner-Guttman-Yassky-2019
CXCL1	TNF	0.00614496	Co-expression	Brunner-Guttman-Yassky-2019
CXCL1	IL8	0.0114391	Co-expression	Brunner-Guttman-Yassky-2019
CXCL1	IL1B	0.00904094	Co-expression	Brunner-Guttman-Yassky-2019
CXCL1	IL6	0.00758287	Co-expression	Brunner-Guttman-Yassky-2019
CXCL1	CXCL3	0.0094063	Co-expression	Brunner-Guttman-Yassky-2019
IL10RA	TNF	0.00349606	Co-expression	Brunner-Guttman-Yassky-2019
CCL20	TNF	0.0127118	Co-expression	Brunner-Guttman-Yassky-2019
CCL20	CXCL1	0.0139328	Co-expression	Brunner-Guttman-Yassky-2019
CCL20	IL9	0.0138373	Co-expression	Brunner-Guttman-Yassky-2019
NLRP7	IL10	0.0238916	Co-expression	Brunner-Guttman-Yassky-2019
IL1A	IL1B	0.020069	Co-expression	Brunner-Guttman-Yassky-2019
IL1A	CXCR1	0.0128122	Co-expression	Brunner-Guttman-Yassky-2019
PROK2	IFNG	0.00635538	Co-expression	Brunner-Guttman-Yassky-2019
PROK2	PTGS2	0.0169322	Co-expression	Brunner-Guttman-Yassky-2019
PROK2	IL8	0.0172399	Co-expression	Brunner-Guttman-Yassky-2019
PROK2	IL1B	0.0203799	Co-expression	Brunner-Guttman-Yassky-2019
PROK2	IL6	0.0117979	Co-expression	Brunner-Guttman-Yassky-2019
PROK2	CXCR1	0.0130873	Co-expression	Brunner-Guttman-Yassky-2019
PROK2	CXCL3	0.0119957	Co-expression	Brunner-Guttman-Yassky-2019
PROK2	CCL4	0.00961115	Co-expression	Brunner-Guttman-Yassky-2019
PROK2	IL1A	0.0153606	Co-expression	Brunner-Guttman-Yassky-2019
OSM	IL8	0.0152901	Co-expression	Brunner-Guttman-Yassky-2019
OSM	PROK2	0.014829	Co-expression	Brunner-Guttman-Yassky-2019
TNFAIP3	TNF	0.0135813	Co-expression	Brunner-Guttman-Yassky-2019
TNFAIP3	IL10RA	0.00591603	Co-expression	Brunner-Guttman-Yassky-2019
TNFAIP3	CCL20	0.0229245	Co-expression	Brunner-Guttman-Yassky-2019
CSF3	IFNG	0.00636329	Co-expression	Brunner-Guttman-Yassky-2019
CSF3	IL1B	0.008111	Co-expression	Brunner-Guttman-Yassky-2019
CSF3	IL6	0.0098301	Co-expression	Brunner-Guttman-Yassky-2019
CSF3	CXCL3	0.00890998	Co-expression	Brunner-Guttman-Yassky-2019
NFKBIA	NFKB1	0.00410744	Co-expression	Brunner-Guttman-Yassky-2019
BCL2A1	IL8	0.00900109	Co-expression	Brunner-Guttman-Yassky-2019
BCL2A1	IL1B	0.00746292	Co-expression	Brunner-Guttman-Yassky-2019
BCL2A1	CXCL3	0.00613097	Co-expression	Brunner-Guttman-Yassky-2019
BCL2A1	CXCL1	0.00596101	Co-expression	Brunner-Guttman-Yassky-2019
BCL2A1	CCL20	0.00996024	Co-expression	Brunner-Guttman-Yassky-2019
BCL2A1	PROK2	0.00698114	Co-expression	Brunner-Guttman-Yassky-2019
IL8	PTGS2	0.0256965	Co-expression	Skrzypczak-Ostrowsk-2010
IL1B	PTGS2	0.0278976	Co-expression	Skrzypczak-Ostrowsk-2010
IL1B	IL8	0.0306383	Co-expression	Skrzypczak-Ostrowsk-2010
IL6	PTGS2	0.0262144	Co-expression	Skrzypczak-Ostrowsk-2010
IL6	IL8	0.022662	Co-expression	Skrzypczak-Ostrowsk-2010
IL6	IL1B	0.0260372	Co-expression	Skrzypczak-Ostrowsk-2010
CXCL2	CXCL3	0.0237705	Co-expression	Skrzypczak-Ostrowsk-2010
CCL4	PTGS2	0.0219506	Co-expression	Skrzypczak-Ostrowsk-2010
CCL4	IL8	0.0243748	Co-expression	Skrzypczak-Ostrowsk-2010
CCL4	IL1B	0.0236963	Co-expression	Skrzypczak-Ostrowsk-2010
CCL4	IL6	0.020319	Co-expression	Skrzypczak-Ostrowsk-2010
CXCL1	CXCL3	0.0205374	Co-expression	Skrzypczak-Ostrowsk-2010
CXCL1	CXCL2	0.0223338	Co-expression	Skrzypczak-Ostrowsk-2010
CCL20	CXCL2	0.0208916	Co-expression	Skrzypczak-Ostrowsk-2010
IL1A	IL8	0.0216141	Co-expression	Skrzypczak-Ostrowsk-2010
IL1A	IL1B	0.0315812	Co-expression	Skrzypczak-Ostrowsk-2010
IL1A	IL6	0.0185676	Co-expression	Skrzypczak-Ostrowsk-2010
IL1A	CXCL3	0.0155924	Co-expression	Skrzypczak-Ostrowsk-2010
IL1A	CXCL2	0.0178971	Co-expression	Skrzypczak-Ostrowsk-2010
IL1A	CXCL1	0.0146426	Co-expression	Skrzypczak-Ostrowsk-2010
G0S2	PTGS2	0.0242505	Co-expression	Skrzypczak-Ostrowsk-2010
G0S2	IL6	0.0244228	Co-expression	Skrzypczak-Ostrowsk-2010
G0S2	CCL4	0.0217509	Co-expression	Skrzypczak-Ostrowsk-2010
BCL2A1	PTGS2	0.0155175	Co-expression	Skrzypczak-Ostrowsk-2010
BCL2A1	IL8	0.0184635	Co-expression	Skrzypczak-Ostrowsk-2010
BCL2A1	IL1B	0.0173654	Co-expression	Skrzypczak-Ostrowsk-2010
BCL2A1	IL6	0.0155292	Co-expression	Skrzypczak-Ostrowsk-2010
BCL2A1	CCL4	0.015873	Co-expression	Skrzypczak-Ostrowsk-2010
TNFAIP6	PTGS2	0.0155603	Co-expression	Skrzypczak-Ostrowsk-2010
TNFAIP6	IL8	0.0167501	Co-expression	Skrzypczak-Ostrowsk-2010
TNFAIP6	IL1B	0.0150024	Co-expression	Skrzypczak-Ostrowsk-2010
TNFAIP6	IL6	0.0170826	Co-expression	Skrzypczak-Ostrowsk-2010
TNFAIP6	CCL4	0.0162143	Co-expression	Skrzypczak-Ostrowsk-2010
TNFAIP6	G0S2	0.015713	Co-expression	Skrzypczak-Ostrowsk-2010
TNFAIP6	BCL2A1	0.0128681	Co-expression	Skrzypczak-Ostrowsk-2010
IL12B	IL17	0.0185357	Co-expression	Brodmerkel-Krueger-2019 B
IFNG	IL17	0.0295094	Co-expression	Brodmerkel-Krueger-2019 B
IFNG	IL12B	0.0160238	Co-expression	Brodmerkel-Krueger-2019 B
TNF	IFNG	0.0207394	Co-expression	Brodmerkel-Krueger-2019 B
IL8	IL17	0.0170623	Co-expression	Brodmerkel-Krueger-2019 B
IL8	PTGS2	0.0154742	Co-expression	Brodmerkel-Krueger-2019 B
IL1B	IL17	0.0141283	Co-expression	Brodmerkel-Krueger-2019 B
IL1B	IL12B	0.0110874	Co-expression	Brodmerkel-Krueger-2019 B
IL1B	IFNG	0.0107216	Co-expression	Brodmerkel-Krueger-2019 B
IL1B	PTGS2	0.0131005	Co-expression	Brodmerkel-Krueger-2019 B
IL1B	IL8	0.0148939	Co-expression	Brodmerkel-Krueger-2019 B
CXCL3	IL17	0.0181043	Co-expression	Brodmerkel-Krueger-2019 B
CXCL3	IL12B	0.0132186	Co-expression	Brodmerkel-Krueger-2019 B
CXCL2	IL17	0.00669028	Co-expression	Brodmerkel-Krueger-2019 B
CXCL2	IL12B	0.00555037	Co-expression	Brodmerkel-Krueger-2019 B
CXCL2	IFNG	0.0047553	Co-expression	Brodmerkel-Krueger-2019 B
CXCL2	PTGS2	0.00639836	Co-expression	Brodmerkel-Krueger-2019 B
CXCL2	IL8	0.00622993	Co-expression	Brodmerkel-Krueger-2019 B
CXCL2	IL1B	0.00487924	Co-expression	Brodmerkel-Krueger-2019 B
CXCL2	CXCL3	0.00657034	Co-expression	Brodmerkel-Krueger-2019 B
CCL4	IL17	0.0271633	Co-expression	Brodmerkel-Krueger-2019 B
CCL4	IFNG	0.0295045	Co-expression	Brodmerkel-Krueger-2019 B
CCL4	IL8	0.0169374	Co-expression	Brodmerkel-Krueger-2019 B
CCL4	IL1B	0.0130983	Co-expression	Brodmerkel-Krueger-2019 B
CCL4	CXCL3	0.0318774	Co-expression	Brodmerkel-Krueger-2019 B
CCL4	CXCL2	0.00621184	Co-expression	Brodmerkel-Krueger-2019 B
CXCL1	IL17	0.0054084	Co-expression	Brodmerkel-Krueger-2019 B
CXCL1	IL12B	0.00440163	Co-expression	Brodmerkel-Krueger-2019 B
CXCL1	IL8	0.00566121	Co-expression	Brodmerkel-Krueger-2019 B
CXCL1	IL1B	0.00433038	Co-expression	Brodmerkel-Krueger-2019 B
CXCL1	CXCL2	0.00233865	Co-expression	Brodmerkel-Krueger-2019 B
CXCL1	CCL4	0.00464134	Co-expression	Brodmerkel-Krueger-2019 B
HCAR3	CXCR2	0.00397652	Co-expression	Brodmerkel-Krueger-2019 B
CCL20	IL17	0.00551996	Co-expression	Brodmerkel-Krueger-2019 B
CCL20	IL12B	0.00435378	Co-expression	Brodmerkel-Krueger-2019 B
CCL20	CXCR2	0.00167483	Co-expression	Brodmerkel-Krueger-2019 B
CCL20	IL8	0.00533028	Co-expression	Brodmerkel-Krueger-2019 B
CCL20	IL1B	0.0040631	Co-expression	Brodmerkel-Krueger-2019 B
CCL20	CXCL2	0.00226656	Co-expression	Brodmerkel-Krueger-2019 B
CCL20	CCL4	0.00501803	Co-expression	Brodmerkel-Krueger-2019 B
CCL20	CXCL1	0.00188155	Co-expression	Brodmerkel-Krueger-2019 B
NLRP7	IL17	0.026058	Co-expression	Brodmerkel-Krueger-2019 B
NLRP7	IL8	0.0184977	Co-expression	Brodmerkel-Krueger-2019 B
NLRP7	IL1B	0.0152018	Co-expression	Brodmerkel-Krueger-2019 B
NLRP7	CCL4	0.0241336	Co-expression	Brodmerkel-Krueger-2019 B
NLRP7	CXCL1	0.00585784	Co-expression	Brodmerkel-Krueger-2019 B
NLRP7	CCL20	0.00537528	Co-expression	Brodmerkel-Krueger-2019 B
IL1A	IL12B	0.0146239	Co-expression	Brodmerkel-Krueger-2019 B
IL1A	IL1B	0.011934	Co-expression	Brodmerkel-Krueger-2019 B
PROK2	PTGS2	0.0225162	Co-expression	Brodmerkel-Krueger-2019 B
PROK2	IL8	0.0141638	Co-expression	Brodmerkel-Krueger-2019 B
PROK2	IL1B	0.0129998	Co-expression	Brodmerkel-Krueger-2019 B
PROK2	CXCL3	0.0282305	Co-expression	Brodmerkel-Krueger-2019 B
PROK2	CCL4	0.0185942	Co-expression	Brodmerkel-Krueger-2019 B
OSM	PTGS2	0.0252966	Co-expression	Brodmerkel-Krueger-2019 B
OSM	IL8	0.0187278	Co-expression	Brodmerkel-Krueger-2019 B
OSM	IL1B	0.0182024	Co-expression	Brodmerkel-Krueger-2019 B
OSM	CCL4	0.0199389	Co-expression	Brodmerkel-Krueger-2019 B
OSM	CXCL1	0.00353847	Co-expression	Brodmerkel-Krueger-2019 B
OSM	NLRP7	0.0167245	Co-expression	Brodmerkel-Krueger-2019 B
OSM	IL1A	0.0207283	Co-expression	Brodmerkel-Krueger-2019 B
OSM	PROK2	0.042665	Co-expression	Brodmerkel-Krueger-2019 B
TNFAIP3	IL12B	0.0163265	Co-expression	Brodmerkel-Krueger-2019 B
TNFAIP3	IL7	0.0235068	Co-expression	Brodmerkel-Krueger-2019 B
TNFAIP3	PTGS2	0.0261839	Co-expression	Brodmerkel-Krueger-2019 B
TNFAIP3	CXCL2	0.00726957	Co-expression	Brodmerkel-Krueger-2019 B
NFKBIA	NFKB1	0.0106197	Co-expression	Brodmerkel-Krueger-2019 B
BCL2A1	IL17	0.00757764	Co-expression	Brodmerkel-Krueger-2019 B
BCL2A1	CXCR2	0.00212405	Co-expression	Brodmerkel-Krueger-2019 B
BCL2A1	IL8	0.00764349	Co-expression	Brodmerkel-Krueger-2019 B
BCL2A1	IL1B	0.00585491	Co-expression	Brodmerkel-Krueger-2019 B
BCL2A1	CXCL2	0.0031724	Co-expression	Brodmerkel-Krueger-2019 B
BCL2A1	CCL4	0.00743399	Co-expression	Brodmerkel-Krueger-2019 B
BCL2A1	CXCL1	0.00261469	Co-expression	Brodmerkel-Krueger-2019 B
BCL2A1	CCL20	0.00278195	Co-expression	Brodmerkel-Krueger-2019 B
BCL2A1	NLRP7	0.0077863	Co-expression	Brodmerkel-Krueger-2019 B
BCL2A1	OSM	0.00577152	Co-expression	Brodmerkel-Krueger-2019 B
IFNG	IL4	0.0275013	Co-expression	Niu-Wang-2010
IFNG	IL12B	0.0260053	Co-expression	Niu-Wang-2010
IL13	IL4	0.0161867	Co-expression	Niu-Wang-2010
IL13	IFNG	0.0133026	Co-expression	Niu-Wang-2010
TNF	IL10	0.00980183	Co-expression	Niu-Wang-2010
IL8	IL4	0.0161317	Co-expression	Niu-Wang-2010
IL8	IFNG	0.0123637	Co-expression	Niu-Wang-2010
IL6	IFNG	0.0135826	Co-expression	Niu-Wang-2010
IL6	IL13	0.0200139	Co-expression	Niu-Wang-2010
CCL4	IL8	0.0145955	Co-expression	Niu-Wang-2010
IL10RA	IL12B	0.0108234	Co-expression	Niu-Wang-2010
HCAR3	IL1B	0.0212515	Co-expression	Niu-Wang-2010
NLRP7	IL1B	0.0207696	Co-expression	Niu-Wang-2010
G0S2	IL12B	0.0194991	Co-expression	Niu-Wang-2010
G0S2	CCL4	0.015519	Co-expression	Niu-Wang-2010
SHISA2	IL17	0.00359117	Co-expression	Niu-Wang-2010
PROK2	IL17	0.0171544	Co-expression	Niu-Wang-2010
TNFAIP3	NFKB1	0.00386001	Co-expression	Niu-Wang-2010
TNFAIP3	CCL4	0.00621682	Co-expression	Niu-Wang-2010
TNFAIP3	G0S2	0.00542156	Co-expression	Niu-Wang-2010
NFKBIA	NFKB1	0.00972034	Co-expression	Niu-Wang-2010
NFKBIA	IL10RA	0.0116693	Co-expression	Niu-Wang-2010
NFKBIA	G0S2	0.0198859	Co-expression	Niu-Wang-2010
NFKBIA	TNFAIP3	0.00906687	Co-expression	Niu-Wang-2010
BCL2A1	TNF	0.0062192	Co-expression	Niu-Wang-2010
BCL2A1	HCAR3	0.0106132	Co-expression	Niu-Wang-2010
BCL2A1	G0S2	0.00782245	Co-expression	Niu-Wang-2010
TNFAIP6	IL8	0.012802	Co-expression	Niu-Wang-2010
TNFAIP6	IL1A	0.018087	Co-expression	Niu-Wang-2010
TNFAIP6	TNFAIP3	0.00690873	Co-expression	Niu-Wang-2010
IL13	IL4	0.0335112	Co-expression	Li-Bleecker-2015
IL8	IL10	0.00799841	Co-expression	Li-Bleecker-2015
IL8	PTGS2	0.0180111	Co-expression	Li-Bleecker-2015
IL1B	PTGS2	0.018951	Co-expression	Li-Bleecker-2015
IL1B	TNF	0.0206954	Co-expression	Li-Bleecker-2015
IL1B	IL8	0.0230328	Co-expression	Li-Bleecker-2015
IL6	PTGS2	0.0200261	Co-expression	Li-Bleecker-2015
IL6	IL1B	0.0192948	Co-expression	Li-Bleecker-2015
CXCR1	CXCR2	0.0170907	Co-expression	Li-Bleecker-2015
CXCR1	IL8	0.0171097	Co-expression	Li-Bleecker-2015
NFKB1	IL12B	0.0161192	Co-expression	Li-Bleecker-2015
CXCL3	PTGS2	0.0217337	Co-expression	Li-Bleecker-2015
CXCL3	IL1B	0.0165963	Co-expression	Li-Bleecker-2015
CXCL3	IL6	0.0202416	Co-expression	Li-Bleecker-2015
CXCL2	PTGS2	0.0209803	Co-expression	Li-Bleecker-2015
CXCL2	IL1B	0.0150018	Co-expression	Li-Bleecker-2015
CXCL2	IL6	0.0200081	Co-expression	Li-Bleecker-2015
CXCL2	CXCL3	0.0332698	Co-expression	Li-Bleecker-2015
CCL4	IL10	0.00997357	Co-expression	Li-Bleecker-2015
CCL4	TNF	0.0195493	Co-expression	Li-Bleecker-2015
CCL4	IL8	0.0191995	Co-expression	Li-Bleecker-2015
CCL4	IL1B	0.0151402	Co-expression	Li-Bleecker-2015
CCL4	IL6	0.0171217	Co-expression	Li-Bleecker-2015
CXCL1	IL8	0.0214179	Co-expression	Li-Bleecker-2015
CXCL1	IL1B	0.0162854	Co-expression	Li-Bleecker-2015
IL10RA	IFNG	0.0150035	Co-expression	Li-Bleecker-2015
CCL20	IL10	0.00740089	Co-expression	Li-Bleecker-2015
CCL20	TNF	0.018556	Co-expression	Li-Bleecker-2015
CCL20	IL8	0.0207903	Co-expression	Li-Bleecker-2015
CCL20	IL1B	0.0208787	Co-expression	Li-Bleecker-2015
CCL20	IL6	0.02179	Co-expression	Li-Bleecker-2015
CCL20	CCL4	0.0268197	Co-expression	Li-Bleecker-2015
IL1A	IL1B	0.0340793	Co-expression	Li-Bleecker-2015
G0S2	IL10	0.00957315	Co-expression	Li-Bleecker-2015
G0S2	PTGS2	0.021148	Co-expression	Li-Bleecker-2015
G0S2	IL8	0.0285728	Co-expression	Li-Bleecker-2015
G0S2	CXCR1	0.0185384	Co-expression	Li-Bleecker-2015
G0S2	CCL4	0.0210834	Co-expression	Li-Bleecker-2015
G0S2	CCL20	0.0233329	Co-expression	Li-Bleecker-2015
PROK2	CXCR2	0.0178736	Co-expression	Li-Bleecker-2015
PROK2	IL8	0.0195782	Co-expression	Li-Bleecker-2015
PROK2	CXCR1	0.0188148	Co-expression	Li-Bleecker-2015
PROK2	CXCL1	0.0130206	Co-expression	Li-Bleecker-2015
PROK2	G0S2	0.0184538	Co-expression	Li-Bleecker-2015
OSM	PTGS2	0.0177843	Co-expression	Li-Bleecker-2015
OSM	IL6	0.0118163	Co-expression	Li-Bleecker-2015
OSM	CXCL3	0.0156178	Co-expression	Li-Bleecker-2015
OSM	CXCL2	0.0159769	Co-expression	Li-Bleecker-2015
OSM	HCAR3	0.0106863	Co-expression	Li-Bleecker-2015
TNFAIP3	IL2	0.0181353	Co-expression	Li-Bleecker-2015
TNFAIP3	IFNG	0.0129556	Co-expression	Li-Bleecker-2015
TNFAIP3	IL8	0.0155354	Co-expression	Li-Bleecker-2015
NFKBIA	CCL20	0.0184266	Co-expression	Li-Bleecker-2015
BCL2A1	IL1B	0.0123695	Co-expression	Li-Bleecker-2015
TNFAIP6	IL10	0.00852431	Co-expression	Li-Bleecker-2015
TNFAIP6	IL8	0.0171298	Co-expression	Li-Bleecker-2015
TNFAIP6	IL6	0.0168065	Co-expression	Li-Bleecker-2015
TNFAIP6	CCL4	0.0198358	Co-expression	Li-Bleecker-2015
TNFAIP6	CCL20	0.0268252	Co-expression	Li-Bleecker-2015
TNFAIP6	G0S2	0.0188996	Co-expression	Li-Bleecker-2015
IL10	IL2	0.0171985	Co-expression	Kazmin-Pulendran-2017
IFNG	IL12B	0.0092984	Co-expression	Kazmin-Pulendran-2017
TNF	IL12B	0.00804719	Co-expression	Kazmin-Pulendran-2017
TNF	PTGS2	0.0130467	Co-expression	Kazmin-Pulendran-2017
IL8	PTGS2	0.0157373	Co-expression	Kazmin-Pulendran-2017
IL8	TNF	0.0162336	Co-expression	Kazmin-Pulendran-2017
IL1B	PTGS2	0.0158946	Co-expression	Kazmin-Pulendran-2017
IL1B	TNF	0.0181808	Co-expression	Kazmin-Pulendran-2017
IL1B	IL8	0.0204111	Co-expression	Kazmin-Pulendran-2017
IL6	IL12B	0.00623899	Co-expression	Kazmin-Pulendran-2017
IL6	IFNG	0.00796228	Co-expression	Kazmin-Pulendran-2017
IL6	PTGS2	0.00837001	Co-expression	Kazmin-Pulendran-2017
IL6	TNF	0.00956327	Co-expression	Kazmin-Pulendran-2017
IL6	IL8	0.0103463	Co-expression	Kazmin-Pulendran-2017
IL6	IL1B	0.011057	Co-expression	Kazmin-Pulendran-2017
CXCR1	CXCR2	0.0265407	Co-expression	Kazmin-Pulendran-2017
NFKB1	IL5	0.00357757	Co-expression	Kazmin-Pulendran-2017
NFKB1	IL13	0.00490806	Co-expression	Kazmin-Pulendran-2017
CXCL3	PTGS2	0.014832	Co-expression	Kazmin-Pulendran-2017
CXCL3	TNF	0.0160944	Co-expression	Kazmin-Pulendran-2017
CXCL3	IL8	0.0193177	Co-expression	Kazmin-Pulendran-2017
CXCL3	IL1B	0.0198268	Co-expression	Kazmin-Pulendran-2017
CXCL3	IL6	0.00962605	Co-expression	Kazmin-Pulendran-2017
IL12A	IFNG	0.01479	Co-expression	Kazmin-Pulendran-2017
CXCL2	PTGS2	0.0152295	Co-expression	Kazmin-Pulendran-2017
CXCL2	TNF	0.0170192	Co-expression	Kazmin-Pulendran-2017
CXCL2	IL8	0.0214557	Co-expression	Kazmin-Pulendran-2017
CXCL2	IL1B	0.0215454	Co-expression	Kazmin-Pulendran-2017
CXCL2	IL6	0.0104533	Co-expression	Kazmin-Pulendran-2017
CXCL2	CXCL3	0.0221977	Co-expression	Kazmin-Pulendran-2017
CCL4	IL12B	0.00723703	Co-expression	Kazmin-Pulendran-2017
CCL4	IFNG	0.0109439	Co-expression	Kazmin-Pulendran-2017
CCL4	PTGS2	0.0112564	Co-expression	Kazmin-Pulendran-2017
CCL4	TNF	0.0140978	Co-expression	Kazmin-Pulendran-2017
CCL4	IL8	0.0139308	Co-expression	Kazmin-Pulendran-2017
CCL4	IL1B	0.0155585	Co-expression	Kazmin-Pulendran-2017
CCL4	IL6	0.00853244	Co-expression	Kazmin-Pulendran-2017
CCL4	CXCL3	0.0138721	Co-expression	Kazmin-Pulendran-2017
CCL4	CXCL2	0.0141636	Co-expression	Kazmin-Pulendran-2017
CXCL1	IL12B	0.00974014	Co-expression	Kazmin-Pulendran-2017
CXCL1	PTGS2	0.0153296	Co-expression	Kazmin-Pulendran-2017
CXCL1	TNF	0.0149702	Co-expression	Kazmin-Pulendran-2017
CXCL1	IL8	0.0209984	Co-expression	Kazmin-Pulendran-2017
CXCL1	IL1B	0.0172146	Co-expression	Kazmin-Pulendran-2017
CXCL1	IL6	0.00985765	Co-expression	Kazmin-Pulendran-2017
CXCL1	CXCL3	0.0225616	Co-expression	Kazmin-Pulendran-2017
CXCL1	CXCL2	0.0229996	Co-expression	Kazmin-Pulendran-2017
CXCL1	CCL4	0.0128253	Co-expression	Kazmin-Pulendran-2017
IL10RA	PTGS2	0.0121307	Co-expression	Kazmin-Pulendran-2017
CCL20	IL12B	0.00725644	Co-expression	Kazmin-Pulendran-2017
CCL20	PTGS2	0.0125805	Co-expression	Kazmin-Pulendran-2017
CCL20	TNF	0.0142084	Co-expression	Kazmin-Pulendran-2017
CCL20	IL8	0.0159336	Co-expression	Kazmin-Pulendran-2017
CCL20	IL1B	0.0183341	Co-expression	Kazmin-Pulendran-2017
CCL20	IL6	0.00892314	Co-expression	Kazmin-Pulendran-2017
CCL20	CXCL3	0.0167046	Co-expression	Kazmin-Pulendran-2017
CCL20	CXCL2	0.0180451	Co-expression	Kazmin-Pulendran-2017
CCL20	CCL4	0.0121791	Co-expression	Kazmin-Pulendran-2017
CCL20	CXCL1	0.0160193	Co-expression	Kazmin-Pulendran-2017
IL1A	IL12B	0.00998027	Co-expression	Kazmin-Pulendran-2017
IL1A	PTGS2	0.0143611	Co-expression	Kazmin-Pulendran-2017
IL1A	TNF	0.017023	Co-expression	Kazmin-Pulendran-2017
IL1A	IL8	0.0184641	Co-expression	Kazmin-Pulendran-2017
IL1A	IL1B	0.0199123	Co-expression	Kazmin-Pulendran-2017
IL1A	IL6	0.0112155	Co-expression	Kazmin-Pulendran-2017
IL1A	CXCL3	0.0179163	Co-expression	Kazmin-Pulendran-2017
IL1A	CXCL2	0.0202396	Co-expression	Kazmin-Pulendran-2017
IL1A	CCL4	0.0140914	Co-expression	Kazmin-Pulendran-2017
IL1A	CXCL1	0.0193053	Co-expression	Kazmin-Pulendran-2017
IL1A	CCL20	0.0168672	Co-expression	Kazmin-Pulendran-2017
G0S2	PTGS2	0.016128	Co-expression	Kazmin-Pulendran-2017
G0S2	TNF	0.0159281	Co-expression	Kazmin-Pulendran-2017
G0S2	IL8	0.0196874	Co-expression	Kazmin-Pulendran-2017
G0S2	IL1B	0.0212384	Co-expression	Kazmin-Pulendran-2017
G0S2	IL6	0.00979227	Co-expression	Kazmin-Pulendran-2017
G0S2	CXCL3	0.0202003	Co-expression	Kazmin-Pulendran-2017
G0S2	CXCL2	0.0197635	Co-expression	Kazmin-Pulendran-2017
G0S2	CCL4	0.0142028	Co-expression	Kazmin-Pulendran-2017
G0S2	CXCL1	0.0213562	Co-expression	Kazmin-Pulendran-2017
G0S2	IL10RA	0.0163793	Co-expression	Kazmin-Pulendran-2017
G0S2	CCL20	0.0161095	Co-expression	Kazmin-Pulendran-2017
OSM	IL10	0.0222759	Co-expression	Kazmin-Pulendran-2017
OSM	PROK2	0.0192503	Co-expression	Kazmin-Pulendran-2017
TNFAIP3	PTGS2	0.0137685	Co-expression	Kazmin-Pulendran-2017
TNFAIP3	TNF	0.0172052	Co-expression	Kazmin-Pulendran-2017
TNFAIP3	IL8	0.0172117	Co-expression	Kazmin-Pulendran-2017
TNFAIP3	IL1B	0.0225779	Co-expression	Kazmin-Pulendran-2017
TNFAIP3	IL6	0.0106814	Co-expression	Kazmin-Pulendran-2017
TNFAIP3	CXCL3	0.0187113	Co-expression	Kazmin-Pulendran-2017
TNFAIP3	CXCL2	0.0193713	Co-expression	Kazmin-Pulendran-2017
TNFAIP3	CCL4	0.0150868	Co-expression	Kazmin-Pulendran-2017
TNFAIP3	CCL20	0.0176623	Co-expression	Kazmin-Pulendran-2017
TNFAIP3	IL1A	0.0193	Co-expression	Kazmin-Pulendran-2017
TNFAIP3	G0S2	0.0187934	Co-expression	Kazmin-Pulendran-2017
CSF3	IL12B	0.00408077	Co-expression	Kazmin-Pulendran-2017
CSF3	IFNG	0.00554683	Co-expression	Kazmin-Pulendran-2017
CSF3	NFKB1	0.00202326	Co-expression	Kazmin-Pulendran-2017
NFKBIA	PTGS2	0.013154	Co-expression	Kazmin-Pulendran-2017
NFKBIA	TNF	0.0164498	Co-expression	Kazmin-Pulendran-2017
NFKBIA	IL8	0.0161712	Co-expression	Kazmin-Pulendran-2017
NFKBIA	IL1B	0.0179202	Co-expression	Kazmin-Pulendran-2017
NFKBIA	IL6	0.00898606	Co-expression	Kazmin-Pulendran-2017
NFKBIA	CXCL3	0.0166362	Co-expression	Kazmin-Pulendran-2017
NFKBIA	CXCL2	0.0173454	Co-expression	Kazmin-Pulendran-2017
NFKBIA	CCL4	0.0132853	Co-expression	Kazmin-Pulendran-2017
NFKBIA	CXCL1	0.0155526	Co-expression	Kazmin-Pulendran-2017
NFKBIA	CCL20	0.0139611	Co-expression	Kazmin-Pulendran-2017
NFKBIA	IL1A	0.01578	Co-expression	Kazmin-Pulendran-2017
NFKBIA	G0S2	0.0174758	Co-expression	Kazmin-Pulendran-2017
NFKBIA	TNFAIP3	0.0171391	Co-expression	Kazmin-Pulendran-2017
BCL2A1	PTGS2	0.0106949	Co-expression	Kazmin-Pulendran-2017
BCL2A1	TNF	0.012296	Co-expression	Kazmin-Pulendran-2017
BCL2A1	IL8	0.0134406	Co-expression	Kazmin-Pulendran-2017
BCL2A1	IL1B	0.0154621	Co-expression	Kazmin-Pulendran-2017
BCL2A1	IL6	0.00788527	Co-expression	Kazmin-Pulendran-2017
BCL2A1	CXCL3	0.0119758	Co-expression	Kazmin-Pulendran-2017
BCL2A1	CXCL2	0.0137783	Co-expression	Kazmin-Pulendran-2017
BCL2A1	CCL4	0.0100368	Co-expression	Kazmin-Pulendran-2017
BCL2A1	CXCL1	0.0120955	Co-expression	Kazmin-Pulendran-2017
BCL2A1	CCL20	0.0116389	Co-expression	Kazmin-Pulendran-2017
BCL2A1	IL1A	0.0137994	Co-expression	Kazmin-Pulendran-2017
BCL2A1	G0S2	0.013197	Co-expression	Kazmin-Pulendran-2017
BCL2A1	TNFAIP3	0.0139138	Co-expression	Kazmin-Pulendran-2017
BCL2A1	NFKBIA	0.0113106	Co-expression	Kazmin-Pulendran-2017
TNFAIP6	IL12B	0.00478005	Co-expression	Kazmin-Pulendran-2017
TNFAIP6	PTGS2	0.00590275	Co-expression	Kazmin-Pulendran-2017
TNFAIP6	IL8	0.007275	Co-expression	Kazmin-Pulendran-2017
TNFAIP6	IL1B	0.00760308	Co-expression	Kazmin-Pulendran-2017
TNFAIP6	IL6	0.00495675	Co-expression	Kazmin-Pulendran-2017
TNFAIP6	CXCL2	0.00671482	Co-expression	Kazmin-Pulendran-2017
TNFAIP6	CCL4	0.00575893	Co-expression	Kazmin-Pulendran-2017
TNFAIP6	CXCL1	0.00716313	Co-expression	Kazmin-Pulendran-2017
TNFAIP6	IL10RA	0.00735804	Co-expression	Kazmin-Pulendran-2017
TNFAIP6	CCL20	0.00615005	Co-expression	Kazmin-Pulendran-2017
TNFAIP6	IL1A	0.00826939	Co-expression	Kazmin-Pulendran-2017
TNFAIP6	G0S2	0.00658379	Co-expression	Kazmin-Pulendran-2017
TNFAIP6	TNFAIP3	0.0069756	Co-expression	Kazmin-Pulendran-2017
TNFAIP6	CSF3	0.00343905	Co-expression	Kazmin-Pulendran-2017
TNFAIP6	BCL2A1	0.00578502	Co-expression	Kazmin-Pulendran-2017
IL12B	IL4	0.0138308	Co-expression	Lucas-Chute-2014
IFNG	IL4	0.0119225	Co-expression	Lucas-Chute-2014
IFNG	IL12B	0.00950616	Co-expression	Lucas-Chute-2014
IL7	IL10	0.00961788	Co-expression	Lucas-Chute-2014
TNF	IL4	0.01191	Co-expression	Lucas-Chute-2014
TNF	IL12B	0.00991498	Co-expression	Lucas-Chute-2014
TNF	IFNG	0.00838529	Co-expression	Lucas-Chute-2014
TNF	PTGS2	0.0093488	Co-expression	Lucas-Chute-2014
IL8	IL7	0.00661016	Co-expression	Lucas-Chute-2014
IL1B	PTGS2	0.0119621	Co-expression	Lucas-Chute-2014
IL6	IL12B	0.00863356	Co-expression	Lucas-Chute-2014
IL6	IFNG	0.00834523	Co-expression	Lucas-Chute-2014
IL6	PTGS2	0.0100162	Co-expression	Lucas-Chute-2014
IL6	TNF	0.00686881	Co-expression	Lucas-Chute-2014
IL6	IL1B	0.00782172	Co-expression	Lucas-Chute-2014
CXCR1	CXCR2	0.00186844	Co-expression	Lucas-Chute-2014
NFKB1	IL4	0.00665379	Co-expression	Lucas-Chute-2014
NFKB1	PTGS2	0.00556468	Co-expression	Lucas-Chute-2014
NFKB1	TNF	0.00469504	Co-expression	Lucas-Chute-2014
NFKB1	IL1B	0.00452202	Co-expression	Lucas-Chute-2014
CXCL3	IL10	0.00576874	Co-expression	Lucas-Chute-2014
CXCL3	IL7	0.00574307	Co-expression	Lucas-Chute-2014
CXCL3	IL8	0.00481545	Co-expression	Lucas-Chute-2014
IL12A	IFNG	0.0103587	Co-expression	Lucas-Chute-2014
IL12A	TNF	0.00851439	Co-expression	Lucas-Chute-2014
CXCL2	IL10	0.00625952	Co-expression	Lucas-Chute-2014
CXCL2	IL7	0.00611929	Co-expression	Lucas-Chute-2014
CXCL2	IL8	0.00512749	Co-expression	Lucas-Chute-2014
CXCL2	CXCL3	0.00442606	Co-expression	Lucas-Chute-2014
CCL4	IL4	0.00863324	Co-expression	Lucas-Chute-2014
CCL4	IFNG	0.00689348	Co-expression	Lucas-Chute-2014
CCL4	TNF	0.00630571	Co-expression	Lucas-Chute-2014
CCL4	IL8	0.00532843	Co-expression	Lucas-Chute-2014
CCL4	IL1B	0.00655004	Co-expression	Lucas-Chute-2014
CCL4	IL6	0.00617658	Co-expression	Lucas-Chute-2014
CCL4	NFKB1	0.00406369	Co-expression	Lucas-Chute-2014
CCL4	CXCL3	0.00436486	Co-expression	Lucas-Chute-2014
CCL4	CXCL2	0.00473866	Co-expression	Lucas-Chute-2014
CXCL1	PTGS2	0.0127565	Co-expression	Lucas-Chute-2014
CXCL1	IL8	0.00709481	Co-expression	Lucas-Chute-2014
CXCL1	IL1B	0.0107542	Co-expression	Lucas-Chute-2014
CXCL1	IL6	0.0085943	Co-expression	Lucas-Chute-2014
CXCL1	CXCL3	0.00605509	Co-expression	Lucas-Chute-2014
CXCL1	CXCL2	0.00642834	Co-expression	Lucas-Chute-2014
CXCL1	CCL4	0.00725434	Co-expression	Lucas-Chute-2014
CCL20	IL4	0.00798374	Co-expression	Lucas-Chute-2014
CCL20	IL12B	0.00608748	Co-expression	Lucas-Chute-2014
CCL20	IFNG	0.00609745	Co-expression	Lucas-Chute-2014
CCL20	PTGS2	0.00756798	Co-expression	Lucas-Chute-2014
CCL20	TNF	0.0056826	Co-expression	Lucas-Chute-2014
CCL20	IL1B	0.00618327	Co-expression	Lucas-Chute-2014
CCL20	IL6	0.00624452	Co-expression	Lucas-Chute-2014
CCL20	CXCL3	0.00368252	Co-expression	Lucas-Chute-2014
CCL20	CXCL2	0.00397773	Co-expression	Lucas-Chute-2014
CCL20	CCL4	0.00537663	Co-expression	Lucas-Chute-2014
CCL20	CXCL1	0.00707056	Co-expression	Lucas-Chute-2014
IL1A	TNF	0.0119148	Co-expression	Lucas-Chute-2014
IL1A	IL1B	0.0128783	Co-expression	Lucas-Chute-2014
G0S2	IL12B	0.00797062	Co-expression	Lucas-Chute-2014
G0S2	PTGS2	0.00990924	Co-expression	Lucas-Chute-2014
G0S2	TNF	0.00756379	Co-expression	Lucas-Chute-2014
G0S2	IL1B	0.00837665	Co-expression	Lucas-Chute-2014
G0S2	IL6	0.00695887	Co-expression	Lucas-Chute-2014
G0S2	CCL4	0.00614567	Co-expression	Lucas-Chute-2014
G0S2	CXCL1	0.00869353	Co-expression	Lucas-Chute-2014
G0S2	CCL20	0.00591156	Co-expression	Lucas-Chute-2014
G0S2	IL1A	0.0115281	Co-expression	Lucas-Chute-2014
OSM	CXCL1	0.0108963	Co-expression	Lucas-Chute-2014
TNFAIP3	IL8	0.0037826	Co-expression	Lucas-Chute-2014
TNFAIP3	IL1B	0.00442246	Co-expression	Lucas-Chute-2014
TNFAIP3	NFKB1	0.00295001	Co-expression	Lucas-Chute-2014
TNFAIP3	CCL4	0.0043231	Co-expression	Lucas-Chute-2014
TNFAIP3	CCL20	0.00336352	Co-expression	Lucas-Chute-2014
TNFAIP3	G0S2	0.00405361	Co-expression	Lucas-Chute-2014
CSF3	IL12B	0.0102205	Co-expression	Lucas-Chute-2014
CSF3	IL1B	0.00729892	Co-expression	Lucas-Chute-2014
CSF3	IL6	0.00848929	Co-expression	Lucas-Chute-2014
CSF3	CCL20	0.0057777	Co-expression	Lucas-Chute-2014
CSF3	G0S2	0.00767345	Co-expression	Lucas-Chute-2014
NFKBIA	IL8	0.00541739	Co-expression	Lucas-Chute-2014
NFKBIA	IL1B	0.00769391	Co-expression	Lucas-Chute-2014
NFKBIA	NFKB1	0.00419897	Co-expression	Lucas-Chute-2014
NFKBIA	CXCL2	0.00471829	Co-expression	Lucas-Chute-2014
NFKBIA	CCL4	0.00664284	Co-expression	Lucas-Chute-2014
NFKBIA	CXCL1	0.00838427	Co-expression	Lucas-Chute-2014
NFKBIA	CCL20	0.00544432	Co-expression	Lucas-Chute-2014
NFKBIA	G0S2	0.00723436	Co-expression	Lucas-Chute-2014
NFKBIA	TNFAIP3	0.00498924	Co-expression	Lucas-Chute-2014
BCL2A1	PTGS2	0.00929248	Co-expression	Lucas-Chute-2014
BCL2A1	IL8	0.0056589	Co-expression	Lucas-Chute-2014
BCL2A1	IL1B	0.00746144	Co-expression	Lucas-Chute-2014
BCL2A1	CXCL3	0.00465233	Co-expression	Lucas-Chute-2014
BCL2A1	CXCL2	0.00502347	Co-expression	Lucas-Chute-2014
BCL2A1	CCL4	0.00599184	Co-expression	Lucas-Chute-2014
BCL2A1	CXCL1	0.00884634	Co-expression	Lucas-Chute-2014
BCL2A1	CCL20	0.00545891	Co-expression	Lucas-Chute-2014
BCL2A1	G0S2	0.0068115	Co-expression	Lucas-Chute-2014
BCL2A1	TNFAIP3	0.0044353	Co-expression	Lucas-Chute-2014
BCL2A1	NFKBIA	0.00721226	Co-expression	Lucas-Chute-2014
TNFAIP6	IL1A	0.013949	Co-expression	Lucas-Chute-2014
CXCR2	IL5	0.00413656	Co-expression	Hummel-Siebert-2006
IL7	IL10	0.0112165	Co-expression	Hummel-Siebert-2006
PTGS2	CXCR2	0.00506363	Co-expression	Hummel-Siebert-2006
TNF	IL10	0.0100932	Co-expression	Hummel-Siebert-2006
IL8	CXCR2	0.00549576	Co-expression	Hummel-Siebert-2006
IL8	PTGS2	0.0305908	Co-expression	Hummel-Siebert-2006
IL1B	PTGS2	0.027341	Co-expression	Hummel-Siebert-2006
IL1B	IL8	0.0311446	Co-expression	Hummel-Siebert-2006
IL6	IL12B	0.0262341	Co-expression	Hummel-Siebert-2006
IL6	PTGS2	0.0201174	Co-expression	Hummel-Siebert-2006
IL6	TNF	0.0118463	Co-expression	Hummel-Siebert-2006
IL6	IL8	0.0201557	Co-expression	Hummel-Siebert-2006
IL6	IL1B	0.0208169	Co-expression	Hummel-Siebert-2006
NFKB1	IL7	0.00823544	Co-expression	Hummel-Siebert-2006
CXCL3	CXCR2	0.00665949	Co-expression	Hummel-Siebert-2006
CXCL3	PTGS2	0.0299797	Co-expression	Hummel-Siebert-2006
CXCL3	IL8	0.0317898	Co-expression	Hummel-Siebert-2006
CXCL3	IL1B	0.0285272	Co-expression	Hummel-Siebert-2006
CXCL3	IL6	0.0185171	Co-expression	Hummel-Siebert-2006
CXCL2	CXCR2	0.00555523	Co-expression	Hummel-Siebert-2006
CXCL2	PTGS2	0.0260235	Co-expression	Hummel-Siebert-2006
CXCL2	IL8	0.023798	Co-expression	Hummel-Siebert-2006
CXCL2	IL1B	0.0230319	Co-expression	Hummel-Siebert-2006
CXCL2	IL6	0.0214004	Co-expression	Hummel-Siebert-2006
CXCL2	CXCL3	0.0260336	Co-expression	Hummel-Siebert-2006
CCL4	IFNG	0.0086592	Co-expression	Hummel-Siebert-2006
CXCL1	CXCR2	0.00652296	Co-expression	Hummel-Siebert-2006
CXCL1	PTGS2	0.0259408	Co-expression	Hummel-Siebert-2006
CXCL1	IL8	0.0272969	Co-expression	Hummel-Siebert-2006
CXCL1	IL1B	0.0268099	Co-expression	Hummel-Siebert-2006
CXCL1	IL6	0.0223212	Co-expression	Hummel-Siebert-2006
CXCL1	CXCL3	0.0310504	Co-expression	Hummel-Siebert-2006
CXCL1	CXCL2	0.0279072	Co-expression	Hummel-Siebert-2006
IL10RA	IL7	0.00711774	Co-expression	Hummel-Siebert-2006
HCAR3	CXCR2	0.00576644	Co-expression	Hummel-Siebert-2006
HCAR3	PTGS2	0.0205071	Co-expression	Hummel-Siebert-2006
HCAR3	IL8	0.0261605	Co-expression	Hummel-Siebert-2006
HCAR3	IL1B	0.0337713	Co-expression	Hummel-Siebert-2006
HCAR3	CXCL3	0.0204612	Co-expression	Hummel-Siebert-2006
HCAR3	CXCL2	0.0183098	Co-expression	Hummel-Siebert-2006
HCAR3	CXCL1	0.0227576	Co-expression	Hummel-Siebert-2006
CCL20	CXCR2	0.00571367	Co-expression	Hummel-Siebert-2006
CCL20	PTGS2	0.019905	Co-expression	Hummel-Siebert-2006
CCL20	IL8	0.0201494	Co-expression	Hummel-Siebert-2006
CCL20	IL1B	0.0154563	Co-expression	Hummel-Siebert-2006
CCL20	IL6	0.0206438	Co-expression	Hummel-Siebert-2006
CCL20	CXCL3	0.0207235	Co-expression	Hummel-Siebert-2006
CCL20	CXCL2	0.018789	Co-expression	Hummel-Siebert-2006
CCL20	CXCL1	0.0194189	Co-expression	Hummel-Siebert-2006
IL1A	CXCL3	0.0187214	Co-expression	Hummel-Siebert-2006
IL1A	CXCL1	0.0211422	Co-expression	Hummel-Siebert-2006
G0S2	PTGS2	0.0138684	Co-expression	Hummel-Siebert-2006
G0S2	IL8	0.0168357	Co-expression	Hummel-Siebert-2006
G0S2	IL1B	0.0183422	Co-expression	Hummel-Siebert-2006
G0S2	IL6	0.0158858	Co-expression	Hummel-Siebert-2006
G0S2	CXCL3	0.0155821	Co-expression	Hummel-Siebert-2006
G0S2	CXCL2	0.0144412	Co-expression	Hummel-Siebert-2006
G0S2	CXCL1	0.0163117	Co-expression	Hummel-Siebert-2006
G0S2	HCAR3	0.0144802	Co-expression	Hummel-Siebert-2006
G0S2	CCL20	0.0123663	Co-expression	Hummel-Siebert-2006
OSM	IL8	0.0180235	Co-expression	Hummel-Siebert-2006
TNFAIP3	TNF	0.0058236	Co-expression	Hummel-Siebert-2006
TNFAIP3	IL10RA	0.00445561	Co-expression	Hummel-Siebert-2006
CSF3	PTGS2	0.0128593	Co-expression	Hummel-Siebert-2006
CSF3	IL8	0.0141473	Co-expression	Hummel-Siebert-2006
CSF3	IL1B	0.0112678	Co-expression	Hummel-Siebert-2006
CSF3	CXCL3	0.0153167	Co-expression	Hummel-Siebert-2006
CSF3	CXCL1	0.0140436	Co-expression	Hummel-Siebert-2006
NFKBIA	IL12B	0.00756867	Co-expression	Hummel-Siebert-2006
NFKBIA	IL7	0.00563871	Co-expression	Hummel-Siebert-2006
NFKBIA	TNF	0.00626747	Co-expression	Hummel-Siebert-2006
NFKBIA	IL10RA	0.00496746	Co-expression	Hummel-Siebert-2006
NFKBIA	TNFAIP3	0.00491636	Co-expression	Hummel-Siebert-2006
BCL2A1	IL10	0.00394122	Co-expression	Hummel-Siebert-2006
BCL2A1	IL7	0.00429243	Co-expression	Hummel-Siebert-2006
BCL2A1	TNF	0.00386369	Co-expression	Hummel-Siebert-2006
BCL2A1	NFKB1	0.00351925	Co-expression	Hummel-Siebert-2006
BCL2A1	IL12A	0.00577002	Co-expression	Hummel-Siebert-2006
BCL2A1	IL10RA	0.00355184	Co-expression	Hummel-Siebert-2006
BCL2A1	TNFAIP3	0.00288555	Co-expression	Hummel-Siebert-2006
BCL2A1	NFKBIA	0.00313015	Co-expression	Hummel-Siebert-2006
TNFAIP6	PTGS2	0.0140125	Co-expression	Hummel-Siebert-2006
TNFAIP6	IL8	0.016898	Co-expression	Hummel-Siebert-2006
TNFAIP6	IL1B	0.0193989	Co-expression	Hummel-Siebert-2006
TNFAIP6	CXCL3	0.0182154	Co-expression	Hummel-Siebert-2006
TNFAIP6	CXCL2	0.0131743	Co-expression	Hummel-Siebert-2006
TNFAIP6	CXCL1	0.0171148	Co-expression	Hummel-Siebert-2006
TNFAIP6	G0S2	0.0151407	Co-expression	Hummel-Siebert-2006
IL12B	IL4	0.0171043	Co-expression	Yu-Lee-2012
IFNG	IL2	0.0115796	Co-expression	Yu-Lee-2012
TNF	IFNG	0.012215	Co-expression	Yu-Lee-2012
TNF	IL13	0.026583	Co-expression	Yu-Lee-2012
IL8	CXCR2	0.0117887	Co-expression	Yu-Lee-2012
IL8	PTGS2	0.00587312	Co-expression	Yu-Lee-2012
IL1B	PTGS2	0.00864184	Co-expression	Yu-Lee-2012
IL1B	IL8	0.0089774	Co-expression	Yu-Lee-2012
IL6	IL10	0.0262768	Co-expression	Yu-Lee-2012
CXCR1	CXCR2	0.0175378	Co-expression	Yu-Lee-2012
CXCR1	PTGS2	0.00745498	Co-expression	Yu-Lee-2012
CXCL3	IL8	0.00919542	Co-expression	Yu-Lee-2012
CXCL2	IL8	0.00646246	Co-expression	Yu-Lee-2012
CXCL2	CXCL3	0.0121467	Co-expression	Yu-Lee-2012
CCL4	TNF	0.0112174	Co-expression	Yu-Lee-2012
CXCL1	IL8	0.00393315	Co-expression	Yu-Lee-2012
CXCL1	CXCL3	0.00681057	Co-expression	Yu-Lee-2012
CXCL1	CXCL2	0.00451473	Co-expression	Yu-Lee-2012
HCAR3	CXCR2	0.0111473	Co-expression	Yu-Lee-2012
HCAR3	PTGS2	0.00569393	Co-expression	Yu-Lee-2012
HCAR3	IL8	0.00518741	Co-expression	Yu-Lee-2012
HCAR3	IL1B	0.00722072	Co-expression	Yu-Lee-2012
HCAR3	CXCR1	0.00674441	Co-expression	Yu-Lee-2012
HCAR3	CXCL3	0.00917943	Co-expression	Yu-Lee-2012
HCAR3	CXCL2	0.00616634	Co-expression	Yu-Lee-2012
CCL20	IL12B	0.014418	Co-expression	Yu-Lee-2012
CCL20	PTGS2	0.00853021	Co-expression	Yu-Lee-2012
CCL20	TNF	0.0170076	Co-expression	Yu-Lee-2012
CCL20	HCAR3	0.00828706	Co-expression	Yu-Lee-2012
IL1A	IL12B	0.0223513	Co-expression	Yu-Lee-2012
IL1A	TNF	0.0137872	Co-expression	Yu-Lee-2012
IL1A	CXCL3	0.0171852	Co-expression	Yu-Lee-2012
IL1A	CXCL2	0.00867992	Co-expression	Yu-Lee-2012
IL1A	HCAR3	0.00802957	Co-expression	Yu-Lee-2012
IL1A	CCL20	0.0200064	Co-expression	Yu-Lee-2012
G0S2	PTGS2	0.00645231	Co-expression	Yu-Lee-2012
G0S2	IL8	0.00613558	Co-expression	Yu-Lee-2012
G0S2	IL1B	0.00941075	Co-expression	Yu-Lee-2012
G0S2	CXCL3	0.00868159	Co-expression	Yu-Lee-2012
G0S2	CXCL2	0.00634331	Co-expression	Yu-Lee-2012
G0S2	HCAR3	0.00580491	Co-expression	Yu-Lee-2012
G0S2	CCL20	0.00965313	Co-expression	Yu-Lee-2012
G0S2	IL1A	0.00743927	Co-expression	Yu-Lee-2012
SHISA2	IL5	0.0139467	Co-expression	Yu-Lee-2012
PROK2	PTGS2	0.00768276	Co-expression	Yu-Lee-2012
PROK2	IL8	0.00672854	Co-expression	Yu-Lee-2012
PROK2	IL1B	0.0110769	Co-expression	Yu-Lee-2012
PROK2	G0S2	0.0077632	Co-expression	Yu-Lee-2012
OSM	CCL4	0.0145622	Co-expression	Yu-Lee-2012
TNFAIP3	IL6	0.031245	Co-expression	Yu-Lee-2012
CSF3	IL12B	0.0224045	Co-expression	Yu-Lee-2012
CSF3	TNF	0.0168463	Co-expression	Yu-Lee-2012
CSF3	IL1A	0.0175419	Co-expression	Yu-Lee-2012
NFKBIA	HCAR3	0.00922788	Co-expression	Yu-Lee-2012
NFKBIA	CCL20	0.0223635	Co-expression	Yu-Lee-2012
NFKBIA	G0S2	0.0107077	Co-expression	Yu-Lee-2012
BCL2A1	CCL20	0.0169393	Co-expression	Yu-Lee-2012
BCL2A1	NFKBIA	0.0209295	Co-expression	Yu-Lee-2012
TNFAIP6	IL12B	0.0133954	Co-expression	Yu-Lee-2012
TNFAIP6	PTGS2	0.00756583	Co-expression	Yu-Lee-2012
TNFAIP6	IL8	0.00670066	Co-expression	Yu-Lee-2012
TNFAIP6	CXCL3	0.0135825	Co-expression	Yu-Lee-2012
TNFAIP6	CXCL2	0.00824678	Co-expression	Yu-Lee-2012
TNFAIP6	HCAR3	0.0075774	Co-expression	Yu-Lee-2012
TNFAIP6	CCL20	0.0152598	Co-expression	Yu-Lee-2012
TNFAIP6	IL1A	0.0169428	Co-expression	Yu-Lee-2012
TNFAIP6	G0S2	0.00786324	Co-expression	Yu-Lee-2012
IL4	IL2	0.00408074	Co-expression	An-Zhang-2015
IL5	IL4	0.00634159	Co-expression	An-Zhang-2015
IL12B	IL2	0.0223676	Co-expression	An-Zhang-2015
IL12B	IL4	0.00490371	Co-expression	An-Zhang-2015
IL13	IL4	0.00574841	Co-expression	An-Zhang-2015
IL13	IL5	0.0402369	Co-expression	An-Zhang-2015
TNF	IL10	0.014925	Co-expression	An-Zhang-2015
IL8	CXCR2	0.0198884	Co-expression	An-Zhang-2015
IL8	PTGS2	0.0224009	Co-expression	An-Zhang-2015
IL1B	PTGS2	0.016756	Co-expression	An-Zhang-2015
IL1B	IL8	0.0168428	Co-expression	An-Zhang-2015
IL6	PTGS2	0.0159007	Co-expression	An-Zhang-2015
IL6	IL8	0.0159412	Co-expression	An-Zhang-2015
CXCR1	CXCR2	0.019876	Co-expression	An-Zhang-2015
CXCR1	IL8	0.0139359	Co-expression	An-Zhang-2015
CXCL3	PTGS2	0.00634275	Co-expression	An-Zhang-2015
CXCL3	IL1B	0.00674024	Co-expression	An-Zhang-2015
CXCL2	PTGS2	0.00809694	Co-expression	An-Zhang-2015
CXCL2	IL1B	0.00829905	Co-expression	An-Zhang-2015
CXCL2	CXCL3	0.00570636	Co-expression	An-Zhang-2015
CCL4	IFNG	0.015852	Co-expression	An-Zhang-2015
CCL4	TNF	0.0208481	Co-expression	An-Zhang-2015
CXCL1	PTGS2	0.00696099	Co-expression	An-Zhang-2015
CXCL1	IL1B	0.00780854	Co-expression	An-Zhang-2015
CXCL1	PTGES2	0.00438471	Co-expression	An-Zhang-2015
CXCL1	CXCL3	0.00500112	Co-expression	An-Zhang-2015
CXCL1	CXCL2	0.00593206	Co-expression	An-Zhang-2015
IL10RA	IL10	0.00723425	Co-expression	An-Zhang-2015
HCAR3	CXCR2	0.0181675	Co-expression	An-Zhang-2015
HCAR3	PTGS2	0.0151413	Co-expression	An-Zhang-2015
HCAR3	IL8	0.0228522	Co-expression	An-Zhang-2015
HCAR3	IL6	0.0140648	Co-expression	An-Zhang-2015
HCAR3	CXCR1	0.0131777	Co-expression	An-Zhang-2015
CCL20	IL1B	0.00919636	Co-expression	An-Zhang-2015
CCL20	CXCL3	0.00568163	Co-expression	An-Zhang-2015
CCL20	CXCL2	0.00661057	Co-expression	An-Zhang-2015
CCL20	CXCL1	0.00599044	Co-expression	An-Zhang-2015
IL1A	PTGS2	0.0190008	Co-expression	An-Zhang-2015
IL1A	IL8	0.0230006	Co-expression	An-Zhang-2015
IL1A	IL1B	0.0211952	Co-expression	An-Zhang-2015
IL1A	CXCL3	0.00743462	Co-expression	An-Zhang-2015
IL1A	CXCL2	0.00866812	Co-expression	An-Zhang-2015
IL1A	CXCL1	0.00883072	Co-expression	An-Zhang-2015
IL1A	CCL20	0.00895289	Co-expression	An-Zhang-2015
G0S2	HCAR3	0.0180675	Co-expression	An-Zhang-2015
PROK2	CXCR2	0.021673	Co-expression	An-Zhang-2015
PROK2	IL8	0.0233487	Co-expression	An-Zhang-2015
PROK2	CXCR1	0.0178688	Co-expression	An-Zhang-2015
PROK2	HCAR3	0.022756	Co-expression	An-Zhang-2015
OSM	CXCR2	0.0129556	Co-expression	An-Zhang-2015
OSM	PTGS2	0.0138206	Co-expression	An-Zhang-2015
OSM	IL8	0.0155493	Co-expression	An-Zhang-2015
OSM	IL1B	0.0116497	Co-expression	An-Zhang-2015
OSM	IL6	0.0119412	Co-expression	An-Zhang-2015
OSM	CXCR1	0.00981422	Co-expression	An-Zhang-2015
OSM	CCL4	0.0114608	Co-expression	An-Zhang-2015
OSM	HCAR3	0.0159332	Co-expression	An-Zhang-2015
OSM	PROK2	0.0138444	Co-expression	An-Zhang-2015
TNFAIP3	TNF	0.0163958	Co-expression	An-Zhang-2015
TNFAIP3	CXCL2	0.00721644	Co-expression	An-Zhang-2015
TNFAIP3	CCL4	0.0130574	Co-expression	An-Zhang-2015
TNFAIP3	OSM	0.0103764	Co-expression	An-Zhang-2015
CSF3	CXCR2	0.0138907	Co-expression	An-Zhang-2015
CSF3	PTGS2	0.0172277	Co-expression	An-Zhang-2015
CSF3	IL8	0.0215014	Co-expression	An-Zhang-2015
CSF3	IL1B	0.0131655	Co-expression	An-Zhang-2015
CSF3	IL6	0.0154589	Co-expression	An-Zhang-2015
CSF3	CXCL3	0.00578931	Co-expression	An-Zhang-2015
CSF3	CXCL2	0.00767753	Co-expression	An-Zhang-2015
CSF3	CXCL1	0.00651345	Co-expression	An-Zhang-2015
CSF3	IL1A	0.0167652	Co-expression	An-Zhang-2015
CSF3	PROK2	0.0145119	Co-expression	An-Zhang-2015
CSF3	OSM	0.0106701	Co-expression	An-Zhang-2015
CSF3	TNFAIP3	0.0138616	Co-expression	An-Zhang-2015
NFKBIA	TNFAIP3	0.0166489	Co-expression	An-Zhang-2015
BCL2A1	CCL4	0.0189554	Co-expression	An-Zhang-2015
BCL2A1	HCAR3	0.0238879	Co-expression	An-Zhang-2015
BCL2A1	G0S2	0.0198839	Co-expression	An-Zhang-2015
BCL2A1	PROK2	0.022033	Co-expression	An-Zhang-2015
BCL2A1	OSM	0.0152757	Co-expression	An-Zhang-2015
TNFAIP6	IL6	0.00768914	Co-expression	An-Zhang-2015
TNFAIP6	HCAR3	0.0101193	Co-expression	An-Zhang-2015
TNFAIP6	G0S2	0.00941603	Co-expression	An-Zhang-2015
IL13	IL5	0.00812323	Co-expression	Roth-Zlotnik-2006
TNF	IFNG	0.0351315	Co-expression	Roth-Zlotnik-2006
IL8	PTGS2	0.0205561	Co-expression	Roth-Zlotnik-2006
IL1B	TNF	0.0275778	Co-expression	Roth-Zlotnik-2006
IL6	PTGS2	0.0320864	Co-expression	Roth-Zlotnik-2006
IL6	IL8	0.0200218	Co-expression	Roth-Zlotnik-2006
IL6	IL1B	0.0259487	Co-expression	Roth-Zlotnik-2006
CXCR1	IL10	0.00999671	Co-expression	Roth-Zlotnik-2006
CXCR1	TNF	0.00766782	Co-expression	Roth-Zlotnik-2006
CXCL3	IL6	0.021179	Co-expression	Roth-Zlotnik-2006
CXCL2	IL6	0.022649	Co-expression	Roth-Zlotnik-2006
CXCL2	CXCL3	0.0239574	Co-expression	Roth-Zlotnik-2006
CCL4	IL1B	0.0273208	Co-expression	Roth-Zlotnik-2006
CXCL1	CCL4	0.0233908	Co-expression	Roth-Zlotnik-2006
IL10RA	IL7	0.00585415	Co-expression	Roth-Zlotnik-2006
IL10RA	CCL4	0.00736069	Co-expression	Roth-Zlotnik-2006
HCAR3	CXCR2	0.0194493	Co-expression	Roth-Zlotnik-2006
HCAR3	IL8	0.0179796	Co-expression	Roth-Zlotnik-2006
CCL20	CXCL3	0.0270991	Co-expression	Roth-Zlotnik-2006
NLRP7	IL13	0.00620254	Co-expression	Roth-Zlotnik-2006
IL1A	CXCR2	0.0216587	Co-expression	Roth-Zlotnik-2006
PROK2	IL8	0.0202333	Co-expression	Roth-Zlotnik-2006
OSM	PROK2	0.0197517	Co-expression	Roth-Zlotnik-2006
TNFAIP3	PTGS2	0.018279	Co-expression	Roth-Zlotnik-2006
TNFAIP3	IL6	0.0183416	Co-expression	Roth-Zlotnik-2006
TNFAIP3	CXCL3	0.0129565	Co-expression	Roth-Zlotnik-2006
CSF3	PTGS2	0.0236848	Co-expression	Roth-Zlotnik-2006
CSF3	IL6	0.0269653	Co-expression	Roth-Zlotnik-2006
CSF3	CXCL2	0.0209602	Co-expression	Roth-Zlotnik-2006
CSF3	TNFAIP3	0.0111759	Co-expression	Roth-Zlotnik-2006
NFKBIA	TNFAIP3	0.0170236	Co-expression	Roth-Zlotnik-2006
NFKBIA	CSF3	0.0217509	Co-expression	Roth-Zlotnik-2006
BCL2A1	IL8	0.0156714	Co-expression	Roth-Zlotnik-2006
BCL2A1	PROK2	0.0127674	Co-expression	Roth-Zlotnik-2006
BCL2A1	OSM	0.0136495	Co-expression	Roth-Zlotnik-2006
PTGS2	IL10	0.00978131	Co-expression	Stirewalt-Radich-2008
TNF	PTGS2	0.0129988	Co-expression	Stirewalt-Radich-2008
IL8	PTGS2	0.0125317	Co-expression	Stirewalt-Radich-2008
IL8	TNF	0.0146573	Co-expression	Stirewalt-Radich-2008
IL1B	PTGS2	0.0109588	Co-expression	Stirewalt-Radich-2008
IL1B	TNF	0.0150982	Co-expression	Stirewalt-Radich-2008
IL1B	IL8	0.0100747	Co-expression	Stirewalt-Radich-2008
IL6	PTGS2	0.0124265	Co-expression	Stirewalt-Radich-2008
IL6	TNF	0.0158443	Co-expression	Stirewalt-Radich-2008
IL6	IL1B	0.0130014	Co-expression	Stirewalt-Radich-2008
CXCR1	CXCR2	0.0326718	Co-expression	Stirewalt-Radich-2008
NFKB1	PTGS2	0.0103397	Co-expression	Stirewalt-Radich-2008
NFKB1	IL13	0.0181677	Co-expression	Stirewalt-Radich-2008
NFKB1	TNF	0.0165536	Co-expression	Stirewalt-Radich-2008
NFKB1	IL8	0.015633	Co-expression	Stirewalt-Radich-2008
NFKB1	IL1B	0.00910143	Co-expression	Stirewalt-Radich-2008
CXCL3	PTGS2	0.0155586	Co-expression	Stirewalt-Radich-2008
CXCL3	TNF	0.020267	Co-expression	Stirewalt-Radich-2008
CXCL3	IL8	0.0171124	Co-expression	Stirewalt-Radich-2008
CXCL3	IL1B	0.0141618	Co-expression	Stirewalt-Radich-2008
CXCL3	IL6	0.0176671	Co-expression	Stirewalt-Radich-2008
CXCL3	NFKB1	0.01428	Co-expression	Stirewalt-Radich-2008
CXCL2	PTGS2	0.0140258	Co-expression	Stirewalt-Radich-2008
CXCL2	TNF	0.0170292	Co-expression	Stirewalt-Radich-2008
CXCL2	IL8	0.0164833	Co-expression	Stirewalt-Radich-2008
CXCL2	IL1B	0.0121394	Co-expression	Stirewalt-Radich-2008
CXCL2	IL6	0.0131598	Co-expression	Stirewalt-Radich-2008
CXCL2	NFKB1	0.0136752	Co-expression	Stirewalt-Radich-2008
CXCL2	CXCL3	0.0196905	Co-expression	Stirewalt-Radich-2008
CCL4	PTGS2	0.0111995	Co-expression	Stirewalt-Radich-2008
CCL4	TNF	0.0195227	Co-expression	Stirewalt-Radich-2008
CCL4	IL8	0.0110565	Co-expression	Stirewalt-Radich-2008
CCL4	IL1B	0.0133253	Co-expression	Stirewalt-Radich-2008
CCL4	IL6	0.0151442	Co-expression	Stirewalt-Radich-2008
CCL4	NFKB1	0.0115769	Co-expression	Stirewalt-Radich-2008
CCL4	CXCL3	0.0163355	Co-expression	Stirewalt-Radich-2008
CCL4	CXCL2	0.0138935	Co-expression	Stirewalt-Radich-2008
CXCL1	IL10	0.011561	Co-expression	Stirewalt-Radich-2008
CXCL1	PTGS2	0.013233	Co-expression	Stirewalt-Radich-2008
CXCL1	TNF	0.0128336	Co-expression	Stirewalt-Radich-2008
CXCL1	IL8	0.0120506	Co-expression	Stirewalt-Radich-2008
CXCL1	IL1B	0.0095654	Co-expression	Stirewalt-Radich-2008
CXCL1	CXCL3	0.0141529	Co-expression	Stirewalt-Radich-2008
CXCL1	CXCL2	0.0140603	Co-expression	Stirewalt-Radich-2008
CXCL1	CCL4	0.0109241	Co-expression	Stirewalt-Radich-2008
HCAR3	PTGS2	0.0113616	Co-expression	Stirewalt-Radich-2008
HCAR3	TNF	0.0166649	Co-expression	Stirewalt-Radich-2008
HCAR3	IL8	0.0165666	Co-expression	Stirewalt-Radich-2008
HCAR3	IL1B	0.011178	Co-expression	Stirewalt-Radich-2008
HCAR3	CXCL2	0.0122655	Co-expression	Stirewalt-Radich-2008
HCAR3	CCL4	0.0121498	Co-expression	Stirewalt-Radich-2008
CCL20	PTGS2	0.0150924	Co-expression	Stirewalt-Radich-2008
CCL20	TNF	0.0169151	Co-expression	Stirewalt-Radich-2008
CCL20	IL1B	0.0155067	Co-expression	Stirewalt-Radich-2008
CCL20	IL6	0.0194101	Co-expression	Stirewalt-Radich-2008
CCL20	CXCL3	0.0210987	Co-expression	Stirewalt-Radich-2008
CCL20	CXCL2	0.0152092	Co-expression	Stirewalt-Radich-2008
CCL20	CCL4	0.0176002	Co-expression	Stirewalt-Radich-2008
IL1A	PTGS2	0.014098	Co-expression	Stirewalt-Radich-2008
IL1A	TNF	0.0195287	Co-expression	Stirewalt-Radich-2008
IL1A	IL1B	0.0146589	Co-expression	Stirewalt-Radich-2008
IL1A	IL6	0.0189743	Co-expression	Stirewalt-Radich-2008
IL1A	CXCL3	0.0192622	Co-expression	Stirewalt-Radich-2008
IL1A	CXCL2	0.0151727	Co-expression	Stirewalt-Radich-2008
IL1A	CCL4	0.0165445	Co-expression	Stirewalt-Radich-2008
IL1A	CCL20	0.0201315	Co-expression	Stirewalt-Radich-2008
G0S2	PTGS2	0.00913615	Co-expression	Stirewalt-Radich-2008
G0S2	TNF	0.00931949	Co-expression	Stirewalt-Radich-2008
G0S2	IL8	0.00700546	Co-expression	Stirewalt-Radich-2008
G0S2	IL1B	0.00869549	Co-expression	Stirewalt-Radich-2008
G0S2	IL6	0.0101683	Co-expression	Stirewalt-Radich-2008
G0S2	CXCL3	0.0100605	Co-expression	Stirewalt-Radich-2008
G0S2	CXCL2	0.00866879	Co-expression	Stirewalt-Radich-2008
G0S2	CCL4	0.00904084	Co-expression	Stirewalt-Radich-2008
G0S2	CXCL1	0.0098417	Co-expression	Stirewalt-Radich-2008
G0S2	IL10RA	0.00381489	Co-expression	Stirewalt-Radich-2008
G0S2	HCAR3	0.00890691	Co-expression	Stirewalt-Radich-2008
G0S2	CCL20	0.00978133	Co-expression	Stirewalt-Radich-2008
G0S2	IL1A	0.0112518	Co-expression	Stirewalt-Radich-2008
OSM	IL10	0.0244489	Co-expression	Stirewalt-Radich-2008
OSM	PTGS2	0.00925194	Co-expression	Stirewalt-Radich-2008
TNFAIP3	PTGS2	0.00904928	Co-expression	Stirewalt-Radich-2008
TNFAIP3	TNF	0.0125354	Co-expression	Stirewalt-Radich-2008
TNFAIP3	IL8	0.00987367	Co-expression	Stirewalt-Radich-2008
TNFAIP3	IL1B	0.00956687	Co-expression	Stirewalt-Radich-2008
TNFAIP3	IL6	0.00990537	Co-expression	Stirewalt-Radich-2008
TNFAIP3	NFKB1	0.0107641	Co-expression	Stirewalt-Radich-2008
TNFAIP3	CXCL3	0.0109765	Co-expression	Stirewalt-Radich-2008
TNFAIP3	CXCL2	0.0104021	Co-expression	Stirewalt-Radich-2008
TNFAIP3	CCL4	0.0110172	Co-expression	Stirewalt-Radich-2008
TNFAIP3	CXCL1	0.00894511	Co-expression	Stirewalt-Radich-2008
TNFAIP3	IL10RA	0.00400917	Co-expression	Stirewalt-Radich-2008
TNFAIP3	HCAR3	0.0111254	Co-expression	Stirewalt-Radich-2008
TNFAIP3	CCL20	0.0104053	Co-expression	Stirewalt-Radich-2008
TNFAIP3	IL1A	0.0119363	Co-expression	Stirewalt-Radich-2008
TNFAIP3	G0S2	0.00783403	Co-expression	Stirewalt-Radich-2008
CSF3	IL10	0.0200285	Co-expression	Stirewalt-Radich-2008
CSF3	PTGS2	0.0157059	Co-expression	Stirewalt-Radich-2008
CSF3	IL13	0.0225207	Co-expression	Stirewalt-Radich-2008
CSF3	IL1B	0.011948	Co-expression	Stirewalt-Radich-2008
CSF3	CXCL3	0.0137779	Co-expression	Stirewalt-Radich-2008
CSF3	CXCL2	0.0137373	Co-expression	Stirewalt-Radich-2008
CSF3	CCL4	0.0106543	Co-expression	Stirewalt-Radich-2008
CSF3	CXCL1	0.0141226	Co-expression	Stirewalt-Radich-2008
CSF3	G0S2	0.00889214	Co-expression	Stirewalt-Radich-2008
CSF3	OSM	0.0177337	Co-expression	Stirewalt-Radich-2008
CSF3	TNFAIP3	0.0103981	Co-expression	Stirewalt-Radich-2008
NFKBIA	PTGS2	0.00929796	Co-expression	Stirewalt-Radich-2008
NFKBIA	TNF	0.0126054	Co-expression	Stirewalt-Radich-2008
NFKBIA	IL8	0.0152785	Co-expression	Stirewalt-Radich-2008
NFKBIA	IL1B	0.00990942	Co-expression	Stirewalt-Radich-2008
NFKBIA	NFKB1	0.0135802	Co-expression	Stirewalt-Radich-2008
NFKBIA	CXCL3	0.0124696	Co-expression	Stirewalt-Radich-2008
NFKBIA	CXCL2	0.0125146	Co-expression	Stirewalt-Radich-2008
NFKBIA	CCL4	0.0108997	Co-expression	Stirewalt-Radich-2008
NFKBIA	HCAR3	0.014008	Co-expression	Stirewalt-Radich-2008
NFKBIA	G0S2	0.00737159	Co-expression	Stirewalt-Radich-2008
NFKBIA	TNFAIP3	0.0118353	Co-expression	Stirewalt-Radich-2008
BCL2A1	PTGS2	0.0087132	Co-expression	Stirewalt-Radich-2008
BCL2A1	TNF	0.00987635	Co-expression	Stirewalt-Radich-2008
BCL2A1	IL8	0.00733744	Co-expression	Stirewalt-Radich-2008
BCL2A1	IL1B	0.00867224	Co-expression	Stirewalt-Radich-2008
BCL2A1	IL6	0.00950966	Co-expression	Stirewalt-Radich-2008
BCL2A1	CXCL3	0.00986704	Co-expression	Stirewalt-Radich-2008
BCL2A1	CXCL2	0.008659	Co-expression	Stirewalt-Radich-2008
BCL2A1	CCL4	0.00932718	Co-expression	Stirewalt-Radich-2008
BCL2A1	CXCL1	0.00907964	Co-expression	Stirewalt-Radich-2008
BCL2A1	IL10RA	0.00347965	Co-expression	Stirewalt-Radich-2008
BCL2A1	CCL20	0.0111828	Co-expression	Stirewalt-Radich-2008
BCL2A1	IL1A	0.00950258	Co-expression	Stirewalt-Radich-2008
BCL2A1	G0S2	0.00732008	Co-expression	Stirewalt-Radich-2008
BCL2A1	TNFAIP3	0.00750305	Co-expression	Stirewalt-Radich-2008
BCL2A1	CSF3	0.0102643	Co-expression	Stirewalt-Radich-2008
BCL2A1	NFKBIA	0.00768145	Co-expression	Stirewalt-Radich-2008
TNFAIP6	PTGS2	0.0154586	Co-expression	Stirewalt-Radich-2008
TNFAIP6	IL1B	0.0138803	Co-expression	Stirewalt-Radich-2008
TNFAIP6	IL6	0.0171202	Co-expression	Stirewalt-Radich-2008
TNFAIP6	CXCL2	0.0147224	Co-expression	Stirewalt-Radich-2008
TNFAIP6	CCL4	0.0148644	Co-expression	Stirewalt-Radich-2008
TNFAIP6	CCL20	0.0200725	Co-expression	Stirewalt-Radich-2008
TNFAIP6	G0S2	0.0121524	Co-expression	Stirewalt-Radich-2008
TNFAIP6	BCL2A1	0.0110292	Co-expression	Stirewalt-Radich-2008
IL5	IL4	0.017321	Co-expression	Singh-Celli-2011
IL13	IL4	0.026925	Co-expression	Singh-Celli-2011
IL13	IL5	0.0193137	Co-expression	Singh-Celli-2011
TNF	IL10	0.0080324	Co-expression	Singh-Celli-2011
TNF	IL12B	0.00800049	Co-expression	Singh-Celli-2011
TNF	PTGS2	0.00876662	Co-expression	Singh-Celli-2011
IL8	PTGS2	0.0149447	Co-expression	Singh-Celli-2011
IL1B	PTGS2	0.0149718	Co-expression	Singh-Celli-2011
IL1B	TNF	0.0126504	Co-expression	Singh-Celli-2011
IL6	IL10	0.00917666	Co-expression	Singh-Celli-2011
IL6	TNF	0.0105115	Co-expression	Singh-Celli-2011
CXCR1	CXCR2	0.00729428	Co-expression	Singh-Celli-2011
NFKB1	IL12B	0.00376071	Co-expression	Singh-Celli-2011
NFKB1	TNF	0.00483682	Co-expression	Singh-Celli-2011
NFKB1	IL1B	0.00539998	Co-expression	Singh-Celli-2011
NFKB1	IL6	0.00382864	Co-expression	Singh-Celli-2011
CXCL3	IL10	0.0113883	Co-expression	Singh-Celli-2011
CXCL3	TNF	0.0134926	Co-expression	Singh-Celli-2011
CXCL3	IL6	0.0142365	Co-expression	Singh-Celli-2011
CXCL3	NFKB1	0.00483941	Co-expression	Singh-Celli-2011
CXCL2	TNF	0.0113717	Co-expression	Singh-Celli-2011
CXCL2	IL6	0.00980334	Co-expression	Singh-Celli-2011
CXCL2	NFKB1	0.00511341	Co-expression	Singh-Celli-2011
CXCL2	CXCL3	0.0172696	Co-expression	Singh-Celli-2011
CCL4	TNF	0.0133455	Co-expression	Singh-Celli-2011
CCL4	IL6	0.00984851	Co-expression	Singh-Celli-2011
CCL4	NFKB1	0.00634142	Co-expression	Singh-Celli-2011
CCL4	CXCL3	0.0146159	Co-expression	Singh-Celli-2011
CCL4	CXCL2	0.0135939	Co-expression	Singh-Celli-2011
CXCL1	PTGS2	0.0126247	Co-expression	Singh-Celli-2011
CXCL1	IL8	0.0213876	Co-expression	Singh-Celli-2011
CXCL1	IL1B	0.0147971	Co-expression	Singh-Celli-2011
IL10RA	NFKB1	0.00443454	Co-expression	Singh-Celli-2011
HCAR3	PTGS2	0.0159729	Co-expression	Singh-Celli-2011
HCAR3	IL8	0.0271931	Co-expression	Singh-Celli-2011
HCAR3	IL1B	0.0205484	Co-expression	Singh-Celli-2011
HCAR3	CXCL1	0.0202933	Co-expression	Singh-Celli-2011
CCL20	IL10	0.0110211	Co-expression	Singh-Celli-2011
CCL20	TNF	0.0121423	Co-expression	Singh-Celli-2011
CCL20	IL6	0.0106991	Co-expression	Singh-Celli-2011
CCL20	NFKB1	0.00531914	Co-expression	Singh-Celli-2011
CCL20	CXCL3	0.0199493	Co-expression	Singh-Celli-2011
CCL20	CXCL2	0.014322	Co-expression	Singh-Celli-2011
CCL20	CCL4	0.0154621	Co-expression	Singh-Celli-2011
NLRP7	IL12A	0.0143772	Co-expression	Singh-Celli-2011
IL1A	TNF	0.0158139	Co-expression	Singh-Celli-2011
IL1A	NFKB1	0.00698258	Co-expression	Singh-Celli-2011
G0S2	PTGS2	0.0107605	Co-expression	Singh-Celli-2011
G0S2	IL8	0.0152531	Co-expression	Singh-Celli-2011
G0S2	IL1B	0.0139909	Co-expression	Singh-Celli-2011
G0S2	CXCL1	0.0113966	Co-expression	Singh-Celli-2011
G0S2	HCAR3	0.0160962	Co-expression	Singh-Celli-2011
PROK2	CXCR2	0.00692781	Co-expression	Singh-Celli-2011
PROK2	PTGS2	0.00911069	Co-expression	Singh-Celli-2011
PROK2	IL1B	0.0109014	Co-expression	Singh-Celli-2011
PROK2	CXCL1	0.0107683	Co-expression	Singh-Celli-2011
PROK2	HCAR3	0.0149575	Co-expression	Singh-Celli-2011
PROK2	G0S2	0.00834945	Co-expression	Singh-Celli-2011
OSM	PTGS2	0.00886029	Co-expression	Singh-Celli-2011
OSM	TNF	0.00680038	Co-expression	Singh-Celli-2011
OSM	IL1B	0.0110246	Co-expression	Singh-Celli-2011
OSM	CXCL1	0.00912819	Co-expression	Singh-Celli-2011
OSM	HCAR3	0.0124154	Co-expression	Singh-Celli-2011
OSM	G0S2	0.00827488	Co-expression	Singh-Celli-2011
OSM	PROK2	0.00666667	Co-expression	Singh-Celli-2011
TNFAIP3	IL10	0.00585217	Co-expression	Singh-Celli-2011
TNFAIP3	TNF	0.00626489	Co-expression	Singh-Celli-2011
TNFAIP3	IL6	0.00515711	Co-expression	Singh-Celli-2011
TNFAIP3	NFKB1	0.00307426	Co-expression	Singh-Celli-2011
TNFAIP3	CXCL3	0.00704941	Co-expression	Singh-Celli-2011
TNFAIP3	CXCL2	0.00686329	Co-expression	Singh-Celli-2011
TNFAIP3	CCL4	0.00830379	Co-expression	Singh-Celli-2011
TNFAIP3	CXCL1	0.00722984	Co-expression	Singh-Celli-2011
TNFAIP3	CCL20	0.00897613	Co-expression	Singh-Celli-2011
TNFAIP3	IL1A	0.0110183	Co-expression	Singh-Celli-2011
CSF3	IL10	0.00778253	Co-expression	Singh-Celli-2011
CSF3	IL6	0.00667724	Co-expression	Singh-Celli-2011
CSF3	CXCL3	0.00825319	Co-expression	Singh-Celli-2011
CSF3	CXCL2	0.0073207	Co-expression	Singh-Celli-2011
CSF3	CCL20	0.00831504	Co-expression	Singh-Celli-2011
CSF3	TNFAIP3	0.00423667	Co-expression	Singh-Celli-2011
NFKBIA	PTGS2	0.00792436	Co-expression	Singh-Celli-2011
NFKBIA	TNF	0.00819409	Co-expression	Singh-Celli-2011
NFKBIA	IL1B	0.00991273	Co-expression	Singh-Celli-2011
NFKBIA	NFKB1	0.00393765	Co-expression	Singh-Celli-2011
NFKBIA	CXCL2	0.00934539	Co-expression	Singh-Celli-2011
NFKBIA	CCL4	0.0103843	Co-expression	Singh-Celli-2011
NFKBIA	CCL20	0.00948437	Co-expression	Singh-Celli-2011
NFKBIA	IL1A	0.0128829	Co-expression	Singh-Celli-2011
NFKBIA	G0S2	0.00739283	Co-expression	Singh-Celli-2011
NFKBIA	OSM	0.00620192	Co-expression	Singh-Celli-2011
NFKBIA	TNFAIP3	0.00598494	Co-expression	Singh-Celli-2011
BCL2A1	PTGS2	0.0114161	Co-expression	Singh-Celli-2011
BCL2A1	IL8	0.020165	Co-expression	Singh-Celli-2011
BCL2A1	IL1B	0.013814	Co-expression	Singh-Celli-2011
BCL2A1	CXCL1	0.0140256	Co-expression	Singh-Celli-2011
BCL2A1	HCAR3	0.0208894	Co-expression	Singh-Celli-2011
BCL2A1	G0S2	0.0111549	Co-expression	Singh-Celli-2011
BCL2A1	PROK2	0.0102453	Co-expression	Singh-Celli-2011
BCL2A1	OSM	0.00844902	Co-expression	Singh-Celli-2011
TNFAIP6	TNF	0.0088411	Co-expression	Singh-Celli-2011
TNFAIP6	NFKB1	0.00470338	Co-expression	Singh-Celli-2011
TNFAIP6	CCL4	0.0129933	Co-expression	Singh-Celli-2011
TNFAIP6	CCL20	0.0104866	Co-expression	Singh-Celli-2011
TNFAIP6	IL1A	0.0147921	Co-expression	Singh-Celli-2011
TNFAIP6	TNFAIP3	0.00669964	Co-expression	Singh-Celli-2011
TNFAIP6	NFKBIA	0.0075637	Co-expression	Singh-Celli-2011
IL8	CXCR2	0.0198557	Co-expression	Woodruff-Fahy-2007
IL1B	CXCR2	0.0168127	Co-expression	Woodruff-Fahy-2007
IL1B	TNF	0.0197548	Co-expression	Woodruff-Fahy-2007
IL6	IFNG	0.0176005	Co-expression	Woodruff-Fahy-2007
CXCR1	CXCR2	0.0185167	Co-expression	Woodruff-Fahy-2007
CXCR1	TNF	0.0189606	Co-expression	Woodruff-Fahy-2007
CXCR1	IL1B	0.0181157	Co-expression	Woodruff-Fahy-2007
CXCR1	IL6	0.0209249	Co-expression	Woodruff-Fahy-2007
CXCL3	TNF	0.0162432	Co-expression	Woodruff-Fahy-2007
CXCL3	IL1B	0.0159202	Co-expression	Woodruff-Fahy-2007
CCL4	TNF	0.0283061	Co-expression	Woodruff-Fahy-2007
CCL4	IL1B	0.0218051	Co-expression	Woodruff-Fahy-2007
CCL4	CXCL3	0.0207639	Co-expression	Woodruff-Fahy-2007
IL10RA	TNF	0.00717725	Co-expression	Woodruff-Fahy-2007
IL10RA	IL1B	0.00582468	Co-expression	Woodruff-Fahy-2007
IL10RA	CXCL3	0.00586174	Co-expression	Woodruff-Fahy-2007
IL10RA	CCL4	0.00738209	Co-expression	Woodruff-Fahy-2007
CCL20	TNF	0.0213659	Co-expression	Woodruff-Fahy-2007
CCL20	IL1B	0.0210495	Co-expression	Woodruff-Fahy-2007
CCL20	IL6	0.0251946	Co-expression	Woodruff-Fahy-2007
CCL20	CXCR1	0.024362	Co-expression	Woodruff-Fahy-2007
CCL20	CXCL3	0.0178525	Co-expression	Woodruff-Fahy-2007
CCL20	CCL4	0.0260409	Co-expression	Woodruff-Fahy-2007
CCL20	IL10RA	0.00576481	Co-expression	Woodruff-Fahy-2007
G0S2	CXCR2	0.0299173	Co-expression	Woodruff-Fahy-2007
G0S2	PTGS2	0.0289063	Co-expression	Woodruff-Fahy-2007
G0S2	IL1B	0.0265019	Co-expression	Woodruff-Fahy-2007
G0S2	CXCR1	0.0188343	Co-expression	Woodruff-Fahy-2007
G0S2	CCL4	0.0196278	Co-expression	Woodruff-Fahy-2007
SHISA2	CXCL1	0.0124545	Co-expression	Woodruff-Fahy-2007
PROK2	CXCR2	0.0254986	Co-expression	Woodruff-Fahy-2007
PROK2	PTGS2	0.0287768	Co-expression	Woodruff-Fahy-2007
PROK2	IL8	0.0287161	Co-expression	Woodruff-Fahy-2007
PROK2	IL1B	0.0191223	Co-expression	Woodruff-Fahy-2007
PROK2	CXCR1	0.0212379	Co-expression	Woodruff-Fahy-2007
PROK2	CCL20	0.0195298	Co-expression	Woodruff-Fahy-2007
PROK2	G0S2	0.032912	Co-expression	Woodruff-Fahy-2007
TNFAIP3	CCL20	0.0216286	Co-expression	Woodruff-Fahy-2007
CSF3	IL6	0.0241384	Co-expression	Woodruff-Fahy-2007
CSF3	CXCR1	0.0221009	Co-expression	Woodruff-Fahy-2007
CSF3	CXCL2	0.03021	Co-expression	Woodruff-Fahy-2007
CSF3	CCL20	0.0215114	Co-expression	Woodruff-Fahy-2007
BCL2A1	CXCR2	0.00473077	Co-expression	Woodruff-Fahy-2007
BCL2A1	TNF	0.00664061	Co-expression	Woodruff-Fahy-2007
BCL2A1	IL8	0.00541812	Co-expression	Woodruff-Fahy-2007
BCL2A1	IL1B	0.00636654	Co-expression	Woodruff-Fahy-2007
BCL2A1	CXCL3	0.00591101	Co-expression	Woodruff-Fahy-2007
BCL2A1	CCL4	0.00722739	Co-expression	Woodruff-Fahy-2007
BCL2A1	IL10RA	0.00251419	Co-expression	Woodruff-Fahy-2007
BCL2A1	CCL20	0.00511306	Co-expression	Woodruff-Fahy-2007
BCL2A1	G0S2	0.00653788	Co-expression	Woodruff-Fahy-2007
BCL2A1	PROK2	0.00545251	Co-expression	Woodruff-Fahy-2007
TNFAIP6	TNF	0.0289093	Co-expression	Woodruff-Fahy-2007
TNFAIP6	IL1B	0.0211347	Co-expression	Woodruff-Fahy-2007
TNFAIP6	IL6	0.0224493	Co-expression	Woodruff-Fahy-2007
TNFAIP6	CXCL3	0.0187544	Co-expression	Woodruff-Fahy-2007
TNFAIP6	CCL4	0.0283199	Co-expression	Woodruff-Fahy-2007
TNFAIP6	IL10RA	0.00733219	Co-expression	Woodruff-Fahy-2007
TNFAIP6	CCL20	0.0282858	Co-expression	Woodruff-Fahy-2007
TNFAIP6	PROK2	0.0217483	Co-expression	Woodruff-Fahy-2007
TNFAIP6	BCL2A1	0.00733026	Co-expression	Woodruff-Fahy-2007
TNF	IFNG	0.0182441	Co-expression	Tomasson-Ley-2008
TNF	PTGS2	0.0153606	Co-expression	Tomasson-Ley-2008
IL8	PTGS2	0.0112651	Co-expression	Tomasson-Ley-2008
IL1B	PTGS2	0.0131452	Co-expression	Tomasson-Ley-2008
IL1B	TNF	0.0217194	Co-expression	Tomasson-Ley-2008
IL1B	IL8	0.0105718	Co-expression	Tomasson-Ley-2008
IL6	TNF	0.0225844	Co-expression	Tomasson-Ley-2008
IL6	IL8	0.00936954	Co-expression	Tomasson-Ley-2008
IL6	IL1B	0.0391867	Co-expression	Tomasson-Ley-2008
NFKB1	IL8	0.0112626	Co-expression	Tomasson-Ley-2008
NFKB1	IL6	0.0163344	Co-expression	Tomasson-Ley-2008
CXCL3	PTGS2	0.0187108	Co-expression	Tomasson-Ley-2008
CXCL3	IL8	0.0175417	Co-expression	Tomasson-Ley-2008
CXCL3	NFKB1	0.0236874	Co-expression	Tomasson-Ley-2008
CXCL2	PTGS2	0.0185183	Co-expression	Tomasson-Ley-2008
CXCL2	IL8	0.0157534	Co-expression	Tomasson-Ley-2008
CXCL2	IL6	0.0219885	Co-expression	Tomasson-Ley-2008
CXCL2	NFKB1	0.0242712	Co-expression	Tomasson-Ley-2008
CXCL2	CXCL3	0.0327484	Co-expression	Tomasson-Ley-2008
CCL4	TNF	0.0230687	Co-expression	Tomasson-Ley-2008
CCL4	IL1B	0.0445088	Co-expression	Tomasson-Ley-2008
CCL4	IL6	0.0551971	Co-expression	Tomasson-Ley-2008
HCAR3	TNF	0.0179243	Co-expression	Tomasson-Ley-2008
HCAR3	IL8	0.0109395	Co-expression	Tomasson-Ley-2008
NLRP7	IL13	0.00687733	Co-expression	Tomasson-Ley-2008
G0S2	PTGS2	0.0137743	Co-expression	Tomasson-Ley-2008
G0S2	TNF	0.0140387	Co-expression	Tomasson-Ley-2008
G0S2	IL8	0.00976634	Co-expression	Tomasson-Ley-2008
G0S2	IL1B	0.0150531	Co-expression	Tomasson-Ley-2008
G0S2	IL6	0.0132502	Co-expression	Tomasson-Ley-2008
G0S2	CXCL3	0.0141377	Co-expression	Tomasson-Ley-2008
G0S2	CCL4	0.0126022	Co-expression	Tomasson-Ley-2008
TNFAIP3	IFNG	0.00982286	Co-expression	Tomasson-Ley-2008
TNFAIP3	PTGS2	0.0101607	Co-expression	Tomasson-Ley-2008
TNFAIP3	TNF	0.0133234	Co-expression	Tomasson-Ley-2008
TNFAIP3	IL8	0.00774091	Co-expression	Tomasson-Ley-2008
TNFAIP3	IL1B	0.0126651	Co-expression	Tomasson-Ley-2008
TNFAIP3	IL6	0.0111688	Co-expression	Tomasson-Ley-2008
TNFAIP3	NFKB1	0.00915688	Co-expression	Tomasson-Ley-2008
TNFAIP3	CXCL3	0.0115629	Co-expression	Tomasson-Ley-2008
TNFAIP3	CXCL2	0.0126414	Co-expression	Tomasson-Ley-2008
TNFAIP3	CCL4	0.0112872	Co-expression	Tomasson-Ley-2008
TNFAIP3	G0S2	0.00873274	Co-expression	Tomasson-Ley-2008
NFKBIA	IL1B	0.0277435	Co-expression	Tomasson-Ley-2008
NFKBIA	TNFAIP3	0.0161558	Co-expression	Tomasson-Ley-2008
BCL2A1	PTGS2	0.00924566	Co-expression	Tomasson-Ley-2008
BCL2A1	IL8	0.00803614	Co-expression	Tomasson-Ley-2008
BCL2A1	IL1B	0.0126003	Co-expression	Tomasson-Ley-2008
BCL2A1	CXCL3	0.0100722	Co-expression	Tomasson-Ley-2008
BCL2A1	CXCL1	0.0129656	Co-expression	Tomasson-Ley-2008
BCL2A1	HCAR3	0.00978755	Co-expression	Tomasson-Ley-2008
BCL2A1	G0S2	0.0116411	Co-expression	Tomasson-Ley-2008
TNFAIP6	CXCR2	0.0123814	Co-expression	Tomasson-Ley-2008
TNFAIP6	CXCL1	0.0225054	Co-expression	Tomasson-Ley-2008
PTGS2	IFNG	0.0105291	Co-expression	Innocenti-Brown-2011
IL13	PTGS2	0.00774644	Co-expression	Innocenti-Brown-2011
TNF	IFNG	0.0256809	Co-expression	Innocenti-Brown-2011
TNF	PTGS2	0.00908041	Co-expression	Innocenti-Brown-2011
IL8	PTGS2	0.00953352	Co-expression	Innocenti-Brown-2011
IL1B	IL10	0.0120053	Co-expression	Innocenti-Brown-2011
IL1B	IFNG	0.0130131	Co-expression	Innocenti-Brown-2011
IL1B	PTGS2	0.00717226	Co-expression	Innocenti-Brown-2011
IL1B	TNF	0.0148502	Co-expression	Innocenti-Brown-2011
IL1B	IL8	0.00932692	Co-expression	Innocenti-Brown-2011
IL6	IFNG	0.0100366	Co-expression	Innocenti-Brown-2011
IL6	PTGS2	0.00681813	Co-expression	Innocenti-Brown-2011
IL6	IL8	0.00928261	Co-expression	Innocenti-Brown-2011
IL6	IL1B	0.0075894	Co-expression	Innocenti-Brown-2011
CXCR1	IL5	0.0257028	Co-expression	Innocenti-Brown-2011
CXCL3	PTGS2	0.0109215	Co-expression	Innocenti-Brown-2011
CXCL3	IL8	0.0184621	Co-expression	Innocenti-Brown-2011
CXCL3	IL1B	0.0115541	Co-expression	Innocenti-Brown-2011
CXCL3	IL6	0.00945684	Co-expression	Innocenti-Brown-2011
CXCL2	CXCL3	0.0338353	Co-expression	Innocenti-Brown-2011
CCL4	IFNG	0.018944	Co-expression	Innocenti-Brown-2011
CCL4	TNF	0.0158638	Co-expression	Innocenti-Brown-2011
CCL4	IL1B	0.012225	Co-expression	Innocenti-Brown-2011
CCL4	IL6	0.00773286	Co-expression	Innocenti-Brown-2011
CXCL1	PTGS2	0.010779	Co-expression	Innocenti-Brown-2011
CXCL1	IL8	0.0236409	Co-expression	Innocenti-Brown-2011
CXCL1	IL1B	0.0133034	Co-expression	Innocenti-Brown-2011
CXCL1	IL6	0.0109393	Co-expression	Innocenti-Brown-2011
CXCL1	CXCL3	0.0234586	Co-expression	Innocenti-Brown-2011
IL9	IL2	0.0130457	Co-expression	Innocenti-Brown-2011
HCAR3	IFNG	0.0157918	Co-expression	Innocenti-Brown-2011
HCAR3	PTGS2	0.00858317	Co-expression	Innocenti-Brown-2011
HCAR3	TNF	0.0162415	Co-expression	Innocenti-Brown-2011
HCAR3	IL8	0.0126782	Co-expression	Innocenti-Brown-2011
HCAR3	IL1B	0.0105267	Co-expression	Innocenti-Brown-2011
HCAR3	IL6	0.00858716	Co-expression	Innocenti-Brown-2011
HCAR3	CCL4	0.01154	Co-expression	Innocenti-Brown-2011
CCL20	IL8	0.0100619	Co-expression	Innocenti-Brown-2011
CCL20	NFKB1	0.00714088	Co-expression	Innocenti-Brown-2011
IL1A	IL4	0.0292648	Co-expression	Innocenti-Brown-2011
PROK2	CXCR2	0.0239273	Co-expression	Innocenti-Brown-2011
PROK2	CXCR1	0.0217336	Co-expression	Innocenti-Brown-2011
PROK2	HCAR3	0.0154735	Co-expression	Innocenti-Brown-2011
OSM	IL10	0.0116298	Co-expression	Innocenti-Brown-2011
OSM	IFNG	0.0120982	Co-expression	Innocenti-Brown-2011
OSM	PTGS2	0.00647015	Co-expression	Innocenti-Brown-2011
OSM	TNF	0.0104452	Co-expression	Innocenti-Brown-2011
OSM	IL8	0.00958939	Co-expression	Innocenti-Brown-2011
OSM	IL1B	0.00833656	Co-expression	Innocenti-Brown-2011
OSM	IL6	0.00637286	Co-expression	Innocenti-Brown-2011
OSM	CXCL3	0.0108294	Co-expression	Innocenti-Brown-2011
OSM	CCL4	0.0107328	Co-expression	Innocenti-Brown-2011
OSM	CXCL1	0.0108813	Co-expression	Innocenti-Brown-2011
OSM	HCAR3	0.00951222	Co-expression	Innocenti-Brown-2011
OSM	PROK2	0.00932255	Co-expression	Innocenti-Brown-2011
TNFAIP3	IL10	0.0151461	Co-expression	Innocenti-Brown-2011
TNFAIP3	PTGS2	0.00819426	Co-expression	Innocenti-Brown-2011
TNFAIP3	IL8	0.0134639	Co-expression	Innocenti-Brown-2011
TNFAIP3	IL6	0.00790071	Co-expression	Innocenti-Brown-2011
TNFAIP3	CXCL3	0.0177231	Co-expression	Innocenti-Brown-2011
CSF3	PTGS2	0.0108359	Co-expression	Innocenti-Brown-2011
CSF3	IL8	0.0148833	Co-expression	Innocenti-Brown-2011
CSF3	IL6	0.0121357	Co-expression	Innocenti-Brown-2011
CSF3	CXCL3	0.0190972	Co-expression	Innocenti-Brown-2011
CSF3	TNFAIP3	0.0182367	Co-expression	Innocenti-Brown-2011
NFKBIA	TNFAIP3	0.0150193	Co-expression	Innocenti-Brown-2011
BCL2A1	HCAR3	0.0154218	Co-expression	Innocenti-Brown-2011
TNFAIP6	PTGS2	0.00838102	Co-expression	Innocenti-Brown-2011
TNFAIP6	IL8	0.0128224	Co-expression	Innocenti-Brown-2011
TNFAIP6	IL1B	0.010057	Co-expression	Innocenti-Brown-2011
TNFAIP6	IL6	0.0112353	Co-expression	Innocenti-Brown-2011
TNFAIP6	OSM	0.00861074	Co-expression	Innocenti-Brown-2011
TNFAIP6	CSF3	0.0276318	Co-expression	Innocenti-Brown-2011
PTGS2	IL10	0.0153807	Co-expression	Barnes-Glass-2010
IL13	IL5	0.00664842	Co-expression	Barnes-Glass-2010
IL8	IL10	0.0157094	Co-expression	Barnes-Glass-2010
IL8	PTGS2	0.0194324	Co-expression	Barnes-Glass-2010
IL8	TNF	0.0101533	Co-expression	Barnes-Glass-2010
IL1B	IL10	0.0172646	Co-expression	Barnes-Glass-2010
IL1B	PTGS2	0.0204402	Co-expression	Barnes-Glass-2010
IL1B	TNF	0.0295457	Co-expression	Barnes-Glass-2010
IL1B	IL8	0.0170747	Co-expression	Barnes-Glass-2010
IL6	IL7	0.0132985	Co-expression	Barnes-Glass-2010
IL6	PTGS2	0.0138556	Co-expression	Barnes-Glass-2010
IL6	IL8	0.0123417	Co-expression	Barnes-Glass-2010
IL6	IL1B	0.0198971	Co-expression	Barnes-Glass-2010
CXCR1	CXCR2	0.020839	Co-expression	Barnes-Glass-2010
CXCL3	PTGS2	0.0177986	Co-expression	Barnes-Glass-2010
CXCL3	TNF	0.044062	Co-expression	Barnes-Glass-2010
CXCL3	IL8	0.0186401	Co-expression	Barnes-Glass-2010
CXCL3	IL1B	0.0350699	Co-expression	Barnes-Glass-2010
IL12A	IL7	0.0141409	Co-expression	Barnes-Glass-2010
IL12A	IL6	0.0262734	Co-expression	Barnes-Glass-2010
CXCL2	IL10	0.0163757	Co-expression	Barnes-Glass-2010
CXCL2	PTGS2	0.0161767	Co-expression	Barnes-Glass-2010
CXCL2	TNF	0.0308462	Co-expression	Barnes-Glass-2010
CXCL2	IL8	0.019644	Co-expression	Barnes-Glass-2010
CXCL2	IL1B	0.0291633	Co-expression	Barnes-Glass-2010
CXCL2	CXCL3	0.0360094	Co-expression	Barnes-Glass-2010
CCL4	TNF	0.0184244	Co-expression	Barnes-Glass-2010
CCL4	CXCL3	0.0141485	Co-expression	Barnes-Glass-2010
CXCL1	IL10	0.0185876	Co-expression	Barnes-Glass-2010
CXCL1	CXCR2	0.0126229	Co-expression	Barnes-Glass-2010
CXCL1	PTGS2	0.0191397	Co-expression	Barnes-Glass-2010
CXCL1	IL8	0.0176254	Co-expression	Barnes-Glass-2010
CXCL1	IL1B	0.0166555	Co-expression	Barnes-Glass-2010
CXCL1	CXCR1	0.0144715	Co-expression	Barnes-Glass-2010
CXCL1	CXCL3	0.0186459	Co-expression	Barnes-Glass-2010
CXCL1	CXCL2	0.0164066	Co-expression	Barnes-Glass-2010
HCAR3	IL10	0.0177716	Co-expression	Barnes-Glass-2010
HCAR3	CXCR2	0.015965	Co-expression	Barnes-Glass-2010
HCAR3	PTGS2	0.0181317	Co-expression	Barnes-Glass-2010
HCAR3	IL8	0.0143807	Co-expression	Barnes-Glass-2010
HCAR3	IL1B	0.0194319	Co-expression	Barnes-Glass-2010
HCAR3	CXCR1	0.0200289	Co-expression	Barnes-Glass-2010
HCAR3	CXCL3	0.0141992	Co-expression	Barnes-Glass-2010
HCAR3	CXCL1	0.0185749	Co-expression	Barnes-Glass-2010
CCL20	TNF	0.0253415	Co-expression	Barnes-Glass-2010
CCL20	IL1B	0.0164552	Co-expression	Barnes-Glass-2010
CCL20	CXCL3	0.0245883	Co-expression	Barnes-Glass-2010
G0S2	PTGS2	0.0129298	Co-expression	Barnes-Glass-2010
G0S2	IL8	0.0125673	Co-expression	Barnes-Glass-2010
G0S2	IL1B	0.00785834	Co-expression	Barnes-Glass-2010
G0S2	IL6	0.00911355	Co-expression	Barnes-Glass-2010
G0S2	CXCL3	0.00791453	Co-expression	Barnes-Glass-2010
G0S2	CXCL2	0.00837249	Co-expression	Barnes-Glass-2010
G0S2	CXCL1	0.0102168	Co-expression	Barnes-Glass-2010
PROK2	CXCR2	0.0129066	Co-expression	Barnes-Glass-2010
PROK2	CXCR1	0.0128295	Co-expression	Barnes-Glass-2010
PROK2	CXCL1	0.0121237	Co-expression	Barnes-Glass-2010
OSM	IL4	0.0104186	Co-expression	Barnes-Glass-2010
OSM	PTGS2	0.0131771	Co-expression	Barnes-Glass-2010
OSM	IL8	0.0120396	Co-expression	Barnes-Glass-2010
OSM	G0S2	0.0112476	Co-expression	Barnes-Glass-2010
TNFAIP3	PTGS2	0.00850282	Co-expression	Barnes-Glass-2010
TNFAIP3	TNF	0.00817597	Co-expression	Barnes-Glass-2010
TNFAIP3	IL8	0.00912844	Co-expression	Barnes-Glass-2010
TNFAIP3	IL1B	0.0089508	Co-expression	Barnes-Glass-2010
TNFAIP3	IL6	0.00904754	Co-expression	Barnes-Glass-2010
TNFAIP3	CXCL3	0.0106576	Co-expression	Barnes-Glass-2010
TNFAIP3	CXCL2	0.0111434	Co-expression	Barnes-Glass-2010
TNFAIP3	IL10RA	0.0074201	Co-expression	Barnes-Glass-2010
TNFAIP3	CCL20	0.00901006	Co-expression	Barnes-Glass-2010
TNFAIP3	G0S2	0.00668921	Co-expression	Barnes-Glass-2010
NFKBIA	PTGS2	0.0143089	Co-expression	Barnes-Glass-2010
NFKBIA	TNF	0.023882	Co-expression	Barnes-Glass-2010
NFKBIA	IL8	0.0160128	Co-expression	Barnes-Glass-2010
NFKBIA	IL1B	0.0208708	Co-expression	Barnes-Glass-2010
NFKBIA	CXCL3	0.0254593	Co-expression	Barnes-Glass-2010
NFKBIA	CXCL2	0.0236242	Co-expression	Barnes-Glass-2010
NFKBIA	CXCL1	0.0119286	Co-expression	Barnes-Glass-2010
NFKBIA	CCL20	0.0123317	Co-expression	Barnes-Glass-2010
NFKBIA	G0S2	0.010339	Co-expression	Barnes-Glass-2010
NFKBIA	TNFAIP3	0.0109839	Co-expression	Barnes-Glass-2010
BCL2A1	IL10	0.0144784	Co-expression	Barnes-Glass-2010
BCL2A1	PTGS2	0.0122032	Co-expression	Barnes-Glass-2010
BCL2A1	TNF	0.0109214	Co-expression	Barnes-Glass-2010
BCL2A1	IL8	0.0111011	Co-expression	Barnes-Glass-2010
BCL2A1	IL1B	0.0158391	Co-expression	Barnes-Glass-2010
BCL2A1	IL6	0.01187	Co-expression	Barnes-Glass-2010
BCL2A1	CXCR1	0.00961717	Co-expression	Barnes-Glass-2010
BCL2A1	CXCL3	0.0134918	Co-expression	Barnes-Glass-2010
BCL2A1	CXCL2	0.0115386	Co-expression	Barnes-Glass-2010
BCL2A1	CXCL1	0.0124493	Co-expression	Barnes-Glass-2010
BCL2A1	HCAR3	0.0165001	Co-expression	Barnes-Glass-2010
BCL2A1	NFKBIA	0.0118073	Co-expression	Barnes-Glass-2010
TNFAIP6	IL10	0.0105965	Co-expression	Barnes-Glass-2010
TNFAIP6	CXCR2	0.00867948	Co-expression	Barnes-Glass-2010
TNFAIP6	CXCR1	0.010088	Co-expression	Barnes-Glass-2010
TNFAIP6	HCAR3	0.0087412	Co-expression	Barnes-Glass-2010
TNFAIP6	PROK2	0.00936258	Co-expression	Barnes-Glass-2010
TNFAIP6	BCL2A1	0.00818002	Co-expression	Barnes-Glass-2010
IL12B	IL17	0.0298501	Co-expression	Folkersen-Paulsson-Berne-2012
TNF	IFNG	0.0218003	Co-expression	Folkersen-Paulsson-Berne-2012
IL8	IL10	0.00773327	Co-expression	Folkersen-Paulsson-Berne-2012
IL8	PTGS2	0.0277054	Co-expression	Folkersen-Paulsson-Berne-2012
IL1B	PTGS2	0.0259295	Co-expression	Folkersen-Paulsson-Berne-2012
IL1B	IL8	0.0308342	Co-expression	Folkersen-Paulsson-Berne-2012
IL6	IL10	0.00908744	Co-expression	Folkersen-Paulsson-Berne-2012
IL6	IL8	0.0164898	Co-expression	Folkersen-Paulsson-Berne-2012
IL6	IL1B	0.0157631	Co-expression	Folkersen-Paulsson-Berne-2012
CXCR1	CXCR2	0.0167557	Co-expression	Folkersen-Paulsson-Berne-2012
PTGES2	IL13	0.00189322	Co-expression	Folkersen-Paulsson-Berne-2012
CXCL3	IL10	0.008606	Co-expression	Folkersen-Paulsson-Berne-2012
CXCL3	IL8	0.0175732	Co-expression	Folkersen-Paulsson-Berne-2012
CXCL3	IL1B	0.0155966	Co-expression	Folkersen-Paulsson-Berne-2012
CXCL3	IL6	0.0172581	Co-expression	Folkersen-Paulsson-Berne-2012
CXCL2	IL10	0.0101113	Co-expression	Folkersen-Paulsson-Berne-2012
CXCL2	IL1B	0.0278078	Co-expression	Folkersen-Paulsson-Berne-2012
CXCL2	IL6	0.0220323	Co-expression	Folkersen-Paulsson-Berne-2012
CXCL2	CXCL3	0.0219496	Co-expression	Folkersen-Paulsson-Berne-2012
CCL4	IL1B	0.0231031	Co-expression	Folkersen-Paulsson-Berne-2012
CXCL1	IL10	0.00794497	Co-expression	Folkersen-Paulsson-Berne-2012
CXCL1	PTGS2	0.0172177	Co-expression	Folkersen-Paulsson-Berne-2012
CXCL1	IL8	0.0229717	Co-expression	Folkersen-Paulsson-Berne-2012
CXCL1	IL1B	0.0190285	Co-expression	Folkersen-Paulsson-Berne-2012
CXCL1	IL6	0.0171401	Co-expression	Folkersen-Paulsson-Berne-2012
CXCL1	CXCL3	0.0162642	Co-expression	Folkersen-Paulsson-Berne-2012
HCAR3	PTGS2	0.0204418	Co-expression	Folkersen-Paulsson-Berne-2012
HCAR3	IL8	0.0230627	Co-expression	Folkersen-Paulsson-Berne-2012
HCAR3	IL1B	0.0235623	Co-expression	Folkersen-Paulsson-Berne-2012
CCL20	IL10	0.00949708	Co-expression	Folkersen-Paulsson-Berne-2012
CCL20	IL8	0.0230395	Co-expression	Folkersen-Paulsson-Berne-2012
CCL20	IL1B	0.0254651	Co-expression	Folkersen-Paulsson-Berne-2012
CCL20	IL6	0.021092	Co-expression	Folkersen-Paulsson-Berne-2012
CCL20	CXCL3	0.0187982	Co-expression	Folkersen-Paulsson-Berne-2012
CCL20	CXCL1	0.0206268	Co-expression	Folkersen-Paulsson-Berne-2012
G0S2	PTGS2	0.0314053	Co-expression	Folkersen-Paulsson-Berne-2012
G0S2	IL8	0.0347825	Co-expression	Folkersen-Paulsson-Berne-2012
G0S2	IL1B	0.0272799	Co-expression	Folkersen-Paulsson-Berne-2012
G0S2	CCL4	0.0210768	Co-expression	Folkersen-Paulsson-Berne-2012
G0S2	CXCL1	0.015019	Co-expression	Folkersen-Paulsson-Berne-2012
G0S2	HCAR3	0.0219189	Co-expression	Folkersen-Paulsson-Berne-2012
PROK2	CXCR2	0.0182417	Co-expression	Folkersen-Paulsson-Berne-2012
PROK2	CXCR1	0.0122548	Co-expression	Folkersen-Paulsson-Berne-2012
OSM	CCL4	0.0240661	Co-expression	Folkersen-Paulsson-Berne-2012
OSM	G0S2	0.0329845	Co-expression	Folkersen-Paulsson-Berne-2012
TNFAIP3	CCL4	0.0184046	Co-expression	Folkersen-Paulsson-Berne-2012
TNFAIP3	IL10RA	0.00661191	Co-expression	Folkersen-Paulsson-Berne-2012
CSF3	IL13	0.00889248	Co-expression	Folkersen-Paulsson-Berne-2012
CSF3	PTGES2	0.00666085	Co-expression	Folkersen-Paulsson-Berne-2012
BCL2A1	CCL4	0.0119667	Co-expression	Folkersen-Paulsson-Berne-2012
BCL2A1	HCAR3	0.011934	Co-expression	Folkersen-Paulsson-Berne-2012
BCL2A1	G0S2	0.01257	Co-expression	Folkersen-Paulsson-Berne-2012
BCL2A1	OSM	0.0110455	Co-expression	Folkersen-Paulsson-Berne-2012
TNFAIP6	PTGS2	0.018838	Co-expression	Folkersen-Paulsson-Berne-2012
TNFAIP6	IL8	0.0192982	Co-expression	Folkersen-Paulsson-Berne-2012
TNFAIP6	IL1B	0.0182718	Co-expression	Folkersen-Paulsson-Berne-2012
TNFAIP6	CXCL1	0.0195165	Co-expression	Folkersen-Paulsson-Berne-2012
TNF	IFNG	0.0150938	Co-expression	Taylor-Kwo-2008
TNF	PTGS2	0.0151875	Co-expression	Taylor-Kwo-2008
IL8	IFNG	0.00905396	Co-expression	Taylor-Kwo-2008
IL8	PTGS2	0.0142355	Co-expression	Taylor-Kwo-2008
IL8	TNF	0.0149998	Co-expression	Taylor-Kwo-2008
IL1B	PTGS2	0.020845	Co-expression	Taylor-Kwo-2008
IL1B	TNF	0.020644	Co-expression	Taylor-Kwo-2008
IL1B	IL8	0.0134116	Co-expression	Taylor-Kwo-2008
IL6	IFNG	0.00869576	Co-expression	Taylor-Kwo-2008
IL6	PTGS2	0.00844158	Co-expression	Taylor-Kwo-2008
IL6	TNF	0.00852693	Co-expression	Taylor-Kwo-2008
IL6	IL8	0.00890149	Co-expression	Taylor-Kwo-2008
IL6	IL1B	0.00978712	Co-expression	Taylor-Kwo-2008
CXCR1	CXCR2	0.0280332	Co-expression	Taylor-Kwo-2008
CXCL3	PTGS2	0.0170744	Co-expression	Taylor-Kwo-2008
CXCL3	TNF	0.0282519	Co-expression	Taylor-Kwo-2008
CXCL3	IL8	0.0111446	Co-expression	Taylor-Kwo-2008
CXCL3	IL1B	0.0275811	Co-expression	Taylor-Kwo-2008
CXCL2	PTGS2	0.019689	Co-expression	Taylor-Kwo-2008
CXCL2	TNF	0.031743	Co-expression	Taylor-Kwo-2008
CXCL2	IL8	0.0153346	Co-expression	Taylor-Kwo-2008
CXCL2	IL1B	0.0260149	Co-expression	Taylor-Kwo-2008
CXCL2	CXCL3	0.0423035	Co-expression	Taylor-Kwo-2008
CCL4	IFNG	0.012896	Co-expression	Taylor-Kwo-2008
CCL4	TNF	0.0345217	Co-expression	Taylor-Kwo-2008
CCL4	IL8	0.0123839	Co-expression	Taylor-Kwo-2008
CCL4	IL1B	0.0250684	Co-expression	Taylor-Kwo-2008
CCL4	CXCL3	0.0407329	Co-expression	Taylor-Kwo-2008
CCL4	CXCL2	0.0366946	Co-expression	Taylor-Kwo-2008
CXCL1	PTGS2	0.0195916	Co-expression	Taylor-Kwo-2008
CXCL1	IL8	0.0105018	Co-expression	Taylor-Kwo-2008
IL9	IL13	0.0253605	Co-expression	Taylor-Kwo-2008
HCAR3	IFNG	0.00772007	Co-expression	Taylor-Kwo-2008
HCAR3	PTGS2	0.00692318	Co-expression	Taylor-Kwo-2008
HCAR3	TNF	0.00772475	Co-expression	Taylor-Kwo-2008
HCAR3	IL8	0.00704968	Co-expression	Taylor-Kwo-2008
HCAR3	IL1B	0.00897153	Co-expression	Taylor-Kwo-2008
HCAR3	IL6	0.00588776	Co-expression	Taylor-Kwo-2008
HCAR3	CXCL3	0.00705582	Co-expression	Taylor-Kwo-2008
HCAR3	CXCL2	0.00795487	Co-expression	Taylor-Kwo-2008
CCL20	IFNG	0.0148295	Co-expression	Taylor-Kwo-2008
CCL20	PTGS2	0.0209496	Co-expression	Taylor-Kwo-2008
CCL20	TNF	0.0209421	Co-expression	Taylor-Kwo-2008
CCL20	IL8	0.0163283	Co-expression	Taylor-Kwo-2008
CCL20	IL1B	0.0274427	Co-expression	Taylor-Kwo-2008
CCL20	IL6	0.0106075	Co-expression	Taylor-Kwo-2008
CCL20	CXCL3	0.0247825	Co-expression	Taylor-Kwo-2008
CCL20	CXCL2	0.0260539	Co-expression	Taylor-Kwo-2008
CCL20	CCL4	0.0297915	Co-expression	Taylor-Kwo-2008
CCL20	HCAR3	0.00724122	Co-expression	Taylor-Kwo-2008
IL1A	PTGS2	0.0213094	Co-expression	Taylor-Kwo-2008
IL1A	IL8	0.0129815	Co-expression	Taylor-Kwo-2008
IL1A	IL1B	0.0220913	Co-expression	Taylor-Kwo-2008
IL1A	IL6	0.0120444	Co-expression	Taylor-Kwo-2008
IL1A	CXCL2	0.0228429	Co-expression	Taylor-Kwo-2008
G0S2	PTGS2	0.0137168	Co-expression	Taylor-Kwo-2008
G0S2	TNF	0.00989319	Co-expression	Taylor-Kwo-2008
G0S2	IL8	0.00922687	Co-expression	Taylor-Kwo-2008
G0S2	IL1B	0.0103422	Co-expression	Taylor-Kwo-2008
G0S2	CXCL3	0.00886807	Co-expression	Taylor-Kwo-2008
G0S2	CXCL2	0.0107989	Co-expression	Taylor-Kwo-2008
G0S2	CXCL1	0.0105787	Co-expression	Taylor-Kwo-2008
G0S2	HCAR3	0.00531336	Co-expression	Taylor-Kwo-2008
G0S2	CCL20	0.0095835	Co-expression	Taylor-Kwo-2008
OSM	IL10	0.0228219	Co-expression	Taylor-Kwo-2008
OSM	PTGS2	0.0193694	Co-expression	Taylor-Kwo-2008
OSM	IL8	0.0134044	Co-expression	Taylor-Kwo-2008
OSM	IL1B	0.0141827	Co-expression	Taylor-Kwo-2008
OSM	HCAR3	0.0102069	Co-expression	Taylor-Kwo-2008
OSM	G0S2	0.0126981	Co-expression	Taylor-Kwo-2008
TNFAIP3	IFNG	0.00427297	Co-expression	Taylor-Kwo-2008
TNFAIP3	PTGS2	0.00444421	Co-expression	Taylor-Kwo-2008
TNFAIP3	TNF	0.00505705	Co-expression	Taylor-Kwo-2008
TNFAIP3	IL8	0.0040607	Co-expression	Taylor-Kwo-2008
TNFAIP3	IL1B	0.00461288	Co-expression	Taylor-Kwo-2008
TNFAIP3	IL6	0.0036568	Co-expression	Taylor-Kwo-2008
TNFAIP3	CXCL2	0.00488646	Co-expression	Taylor-Kwo-2008
TNFAIP3	CCL4	0.00607776	Co-expression	Taylor-Kwo-2008
TNFAIP3	CCL20	0.00541688	Co-expression	Taylor-Kwo-2008
TNFAIP3	IL1A	0.00680341	Co-expression	Taylor-Kwo-2008
TNFAIP3	G0S2	0.00357519	Co-expression	Taylor-Kwo-2008
NFKBIA	PTGS2	0.00949681	Co-expression	Taylor-Kwo-2008
NFKBIA	TNF	0.0162258	Co-expression	Taylor-Kwo-2008
NFKBIA	IL8	0.0100994	Co-expression	Taylor-Kwo-2008
NFKBIA	IL1B	0.0107484	Co-expression	Taylor-Kwo-2008
NFKBIA	IL6	0.00731973	Co-expression	Taylor-Kwo-2008
NFKBIA	CXCL3	0.0105907	Co-expression	Taylor-Kwo-2008
NFKBIA	CXCL2	0.0139583	Co-expression	Taylor-Kwo-2008
NFKBIA	CCL4	0.0150348	Co-expression	Taylor-Kwo-2008
NFKBIA	CCL20	0.00988441	Co-expression	Taylor-Kwo-2008
NFKBIA	IL1A	0.0131819	Co-expression	Taylor-Kwo-2008
NFKBIA	G0S2	0.00785682	Co-expression	Taylor-Kwo-2008
NFKBIA	TNFAIP3	0.00460082	Co-expression	Taylor-Kwo-2008
BCL2A1	PTGS2	0.0126161	Co-expression	Taylor-Kwo-2008
BCL2A1	TNF	0.0156189	Co-expression	Taylor-Kwo-2008
BCL2A1	IL8	0.00995486	Co-expression	Taylor-Kwo-2008
BCL2A1	IL1B	0.0133774	Co-expression	Taylor-Kwo-2008
BCL2A1	CXCL3	0.0140387	Co-expression	Taylor-Kwo-2008
BCL2A1	CXCL2	0.01731	Co-expression	Taylor-Kwo-2008
BCL2A1	CCL4	0.0172326	Co-expression	Taylor-Kwo-2008
BCL2A1	HCAR3	0.00737523	Co-expression	Taylor-Kwo-2008
BCL2A1	CCL20	0.0115371	Co-expression	Taylor-Kwo-2008
BCL2A1	G0S2	0.00773577	Co-expression	Taylor-Kwo-2008
BCL2A1	NFKBIA	0.0100403	Co-expression	Taylor-Kwo-2008
TNFAIP6	CXCR2	0.0213795	Co-expression	Taylor-Kwo-2008
TNFAIP6	IL1B	0.0129409	Co-expression	Taylor-Kwo-2008
TNFAIP6	CXCR1	0.024003	Co-expression	Taylor-Kwo-2008
TNFAIP6	CXCL3	0.0225955	Co-expression	Taylor-Kwo-2008
TNFAIP6	CXCL2	0.0169193	Co-expression	Taylor-Kwo-2008
TNFAIP6	BCL2A1	0.0112329	Co-expression	Taylor-Kwo-2008
TNF	PTGS2	0.0101783	Co-expression	Pellagatti-Boultwood-2010
IL8	PTGS2	0.00815465	Co-expression	Pellagatti-Boultwood-2010
IL8	TNF	0.00929625	Co-expression	Pellagatti-Boultwood-2010
IL1B	IL12B	0.0239259	Co-expression	Pellagatti-Boultwood-2010
IL1B	PTGS2	0.0107179	Co-expression	Pellagatti-Boultwood-2010
IL1B	TNF	0.019125	Co-expression	Pellagatti-Boultwood-2010
IL1B	IL8	0.00914535	Co-expression	Pellagatti-Boultwood-2010
IL6	IL12B	0.0185532	Co-expression	Pellagatti-Boultwood-2010
IL6	PTGS2	0.00873229	Co-expression	Pellagatti-Boultwood-2010
IL6	TNF	0.0194004	Co-expression	Pellagatti-Boultwood-2010
IL6	IL8	0.00747049	Co-expression	Pellagatti-Boultwood-2010
IL6	IL1B	0.0176286	Co-expression	Pellagatti-Boultwood-2010
NFKB1	PTGS2	0.00683339	Co-expression	Pellagatti-Boultwood-2010
NFKB1	IL8	0.00572402	Co-expression	Pellagatti-Boultwood-2010
NFKB1	IL6	0.00676407	Co-expression	Pellagatti-Boultwood-2010
CXCL3	PTGS2	0.0080107	Co-expression	Pellagatti-Boultwood-2010
CXCL3	TNF	0.012317	Co-expression	Pellagatti-Boultwood-2010
CXCL3	IL8	0.00799694	Co-expression	Pellagatti-Boultwood-2010
CXCL3	IL1B	0.00992315	Co-expression	Pellagatti-Boultwood-2010
CXCL3	IL6	0.00943044	Co-expression	Pellagatti-Boultwood-2010
CXCL3	NFKB1	0.00595023	Co-expression	Pellagatti-Boultwood-2010
CXCL2	PTGS2	0.0152728	Co-expression	Pellagatti-Boultwood-2010
CXCL2	IL8	0.016089	Co-expression	Pellagatti-Boultwood-2010
CXCL2	NFKB1	0.0105729	Co-expression	Pellagatti-Boultwood-2010
CXCL2	CXCL3	0.0170697	Co-expression	Pellagatti-Boultwood-2010
CCL4	IL12B	0.0241902	Co-expression	Pellagatti-Boultwood-2010
CCL4	PTGS2	0.00895614	Co-expression	Pellagatti-Boultwood-2010
CCL4	TNF	0.0203424	Co-expression	Pellagatti-Boultwood-2010
CCL4	IL8	0.00907168	Co-expression	Pellagatti-Boultwood-2010
CCL4	IL1B	0.0211098	Co-expression	Pellagatti-Boultwood-2010
CCL4	IL6	0.0186266	Co-expression	Pellagatti-Boultwood-2010
CCL4	CXCL3	0.0111789	Co-expression	Pellagatti-Boultwood-2010
CCL4	CXCL2	0.0161585	Co-expression	Pellagatti-Boultwood-2010
CXCL1	PTGS2	0.0105913	Co-expression	Pellagatti-Boultwood-2010
CXCL1	TNF	0.0203336	Co-expression	Pellagatti-Boultwood-2010
CXCL1	IL8	0.0101642	Co-expression	Pellagatti-Boultwood-2010
CXCL1	IL1B	0.0146156	Co-expression	Pellagatti-Boultwood-2010
CXCL1	IL6	0.014691	Co-expression	Pellagatti-Boultwood-2010
CXCL1	NFKB1	0.00968635	Co-expression	Pellagatti-Boultwood-2010
CXCL1	CXCL3	0.0129839	Co-expression	Pellagatti-Boultwood-2010
CXCL1	CXCL2	0.0220858	Co-expression	Pellagatti-Boultwood-2010
CXCL1	CCL4	0.0178633	Co-expression	Pellagatti-Boultwood-2010
IL10RA	CCL4	0.00792621	Co-expression	Pellagatti-Boultwood-2010
HCAR3	TNF	0.0125095	Co-expression	Pellagatti-Boultwood-2010
HCAR3	IL8	0.00751221	Co-expression	Pellagatti-Boultwood-2010
HCAR3	CXCL3	0.00713557	Co-expression	Pellagatti-Boultwood-2010
HCAR3	CCL4	0.0106974	Co-expression	Pellagatti-Boultwood-2010
HCAR3	CXCL1	0.0111225	Co-expression	Pellagatti-Boultwood-2010
HCAR3	IL10RA	0.00859961	Co-expression	Pellagatti-Boultwood-2010
CCL20	IL12B	0.0325841	Co-expression	Pellagatti-Boultwood-2010
CCL20	PTGS2	0.0108832	Co-expression	Pellagatti-Boultwood-2010
CCL20	TNF	0.0187037	Co-expression	Pellagatti-Boultwood-2010
CCL20	IL8	0.00878355	Co-expression	Pellagatti-Boultwood-2010
CCL20	IL1B	0.0295667	Co-expression	Pellagatti-Boultwood-2010
CCL20	IL6	0.0173006	Co-expression	Pellagatti-Boultwood-2010
CCL20	CXCL3	0.0102061	Co-expression	Pellagatti-Boultwood-2010
CCL20	CCL4	0.0233314	Co-expression	Pellagatti-Boultwood-2010
NLRP7	PTGES2	0.004106	Co-expression	Pellagatti-Boultwood-2010
IL1A	IL12B	0.027647	Co-expression	Pellagatti-Boultwood-2010
IL1A	PTGS2	0.00968506	Co-expression	Pellagatti-Boultwood-2010
IL1A	IL8	0.00867323	Co-expression	Pellagatti-Boultwood-2010
IL1A	IL1B	0.02362	Co-expression	Pellagatti-Boultwood-2010
IL1A	CXCL3	0.00972779	Co-expression	Pellagatti-Boultwood-2010
IL1A	CCL4	0.0188999	Co-expression	Pellagatti-Boultwood-2010
IL1A	CCL20	0.0314379	Co-expression	Pellagatti-Boultwood-2010
G0S2	TNF	0.0170072	Co-expression	Pellagatti-Boultwood-2010
G0S2	IL8	0.00922298	Co-expression	Pellagatti-Boultwood-2010
G0S2	IL1B	0.0178344	Co-expression	Pellagatti-Boultwood-2010
G0S2	CXCR1	0.0120514	Co-expression	Pellagatti-Boultwood-2010
G0S2	CXCL3	0.00893748	Co-expression	Pellagatti-Boultwood-2010
[truncated: 8,153 more rows]

## Sheet: grp 1-4
Gene 1	Gene 2	Weight	Network group	Network
p53	PTGS2	0.00986512	Co-expression	Alizadeh-Staudt-2000
RAD51	BRCA1	0.00815907	Co-expression	Alizadeh-Staudt-2000
MYB	RAD51	0.0084036	Co-expression	Alizadeh-Staudt-2000
PARP1	RAD51	0.00809979	Co-expression	Alizadeh-Staudt-2000
BRCA1	BRCA2	0.0157567	Co-expression	Wang-Maris-2006
RAD51	p53	0.0230124	Co-expression	Wang-Maris-2006
MYB	RAD51	0.0228207	Co-expression	Wang-Maris-2006
BLM	BRCA2	0.0112389	Co-expression	Wang-Maris-2006
BLM	RAD51	0.0151092	Co-expression	Wang-Maris-2006
TP53BP2	PARP1	0.0101151	Co-expression	Wang-Maris-2006
PSMC3IP	BRCA2	0.0130531	Co-expression	Wang-Maris-2006
BRCA1	BRCA2	0.00661503	Co-expression	Ramaswamy-Golub-2001
BLM	BRCA2	0.00929581	Co-expression	Mallon-McKay-2013
TP53BP2	COP1	0.00574936	Co-expression	Mallon-McKay-2013
PSMC3IP	BRCA1	0.00826827	Co-expression	Mallon-McKay-2013
PSMC3IP	PALB2	0.00444791	Co-expression	Mallon-McKay-2013
PSMC3IP	RAD51	0.00638289	Co-expression	Mallon-McKay-2013
BARD1	RAD51	0.0124112	Co-expression	Boldrick-Relman-2002
BLM	BRCA1	0.0118084	Co-expression	Boldrick-Relman-2002
COP1	PTGS1	0.0101931	Co-expression	Boldrick-Relman-2002
BLM	BRCA1	0.0163986	Co-expression	Rieger-Chu-2004
BARD1	p53	0.0219493	Co-expression	Roth-Zlotnik-2006
RAD51	BRCA2	0.00958459	Co-expression	Innocenti-Brown-2011
BARD1	RAD51	0.0115038	Co-expression	Innocenti-Brown-2011
BRIP1	BRCA1	0.0214193	Co-expression	Innocenti-Brown-2011
BRIP1	MYB	0.0167788	Co-expression	Innocenti-Brown-2011
BLM	RAD51	0.0139571	Co-expression	Innocenti-Brown-2011
BARD1	BRCA2	0.0116506	Co-expression	Dobbin-Giordano-2005
BARD1	BRCA1	0.0115364	Co-expression	Dobbin-Giordano-2005
BLM	BRCA2	0.0129347	Co-expression	Dobbin-Giordano-2005
BLM	BRCA1	0.0131487	Co-expression	Dobbin-Giordano-2005
PSMC3IP	BRCA1	0.0151132	Co-expression	Dobbin-Giordano-2005
PSMC3IP	RAD51	0.0182116	Co-expression	Dobbin-Giordano-2005
PSMC3IP	BARD1	0.00828576	Co-expression	Dobbin-Giordano-2005
BRCA1	BRCA2	0.00835523	Co-expression	Rosenwald-Staudt-2001
RAD51	BRCA1	0.00296764	Co-expression	Rosenwald-Staudt-2001
MYB	RAD51	0.00455929	Co-expression	Rosenwald-Staudt-2001
BLM	BRCA1	0.00801706	Co-expression	Rosenwald-Staudt-2001
MDM2	PTGS2	0.0142673	Co-expression	Perou-Botstein-2000
PTGIS	PTGS2	0.00687781	Co-expression	Chen-Brown-2002
BRCA1	BRCA2	0.0101415	Co-expression	Burington-Shaughnessy-2008
RAD51	BRCA1	0.0152859	Co-expression	Burington-Shaughnessy-2008
BARD1	BRCA2	0.0093173	Co-expression	Burington-Shaughnessy-2008
BARD1	BRCA1	0.00848926	Co-expression	Burington-Shaughnessy-2008
TP53BP2	PARP1	0.0243563	Co-expression	Burington-Shaughnessy-2008
BLM	BRCA2	0.0135749	Co-expression	Bild-Nevins-2006 B
BRCA1	BRCA2	0.00278578	Co-expression	Jiang-de Kok-2017
RAD51	BRCA2	0.00252219	Co-expression	Jiang-de Kok-2017
RAD51	BRCA1	0.00175606	Co-expression	Jiang-de Kok-2017
IRF9	TP53BP1	0.00855754	Co-expression	Jiang-de Kok-2017
BRIP1	BRCA2	0.00413218	Co-expression	Jiang-de Kok-2017
BLM	BRCA2	0.00332635	Co-expression	Jiang-de Kok-2017
BLM	BRCA1	0.00226586	Co-expression	Jiang-de Kok-2017
BLM	RAD51	0.00209308	Co-expression	Jiang-de Kok-2017
BLM	BARD1	0.00529758	Co-expression	Jiang-de Kok-2017
BLM	BRIP1	0.00334086	Co-expression	Jiang-de Kok-2017
PSMC3IP	RAD51	0.00198321	Co-expression	Jiang-de Kok-2017
BARD1	BRCA2	0.0141505	Co-expression	Wang-Cheung-2015
BLM	RAD51	0.0242631	Co-expression	Wang-Cheung-2015
BLM	BARD1	0.0144565	Co-expression	Wang-Cheung-2015
COP1	BARD1	0.00984769	Co-expression	Perou-Botstein-1999
BLM	BARD1	0.0185166	Co-expression	Cheok-Evans-2003
BRCA1	BRCA2	0.0045436	Co-expression	An-Zhang-2015
PALB2	BRCA1	0.00653704	Co-expression	An-Zhang-2015
RAD51	BRCA1	0.00549513	Co-expression	An-Zhang-2015
PARP1	BRCA1	0.00477984	Co-expression	An-Zhang-2015
BRIP1	BRCA2	0.00426573	Co-expression	An-Zhang-2015
BLM	BRCA2	0.0039484	Co-expression	An-Zhang-2015
BLM	BRCA1	0.00332494	Co-expression	An-Zhang-2015
BLM	BARD1	0.00314262	Co-expression	An-Zhang-2015
BLM	PARP1	0.00472344	Co-expression	An-Zhang-2015
SIN3A	TP53BP1	0.0228456	Co-expression	An-Zhang-2015
PSMC3IP	BARD1	0.00263146	Co-expression	An-Zhang-2015
PSMC3IP	PARP1	0.00385587	Co-expression	An-Zhang-2015
PSMC3IP	BLM	0.00241398	Co-expression	An-Zhang-2015
PALB2	BRCA2	0.0166971	Co-expression	Thurnherr-Lee-2016
MYB	BARD1	0.00778669	Co-expression	Thurnherr-Lee-2016
TP53BP1	BARD1	0.0104191	Co-expression	Thurnherr-Lee-2016
BRIP1	BRCA2	0.0117026	Co-expression	Thurnherr-Lee-2016
BRIP1	BRCA1	0.0146415	Co-expression	Thurnherr-Lee-2016
BLM	BRCA2	0.00885264	Co-expression	Thurnherr-Lee-2016
BLM	RAD51	0.00425245	Co-expression	Thurnherr-Lee-2016
BLM	BARD1	0.00622006	Co-expression	Thurnherr-Lee-2016
BLM	TP53BP1	0.0108681	Co-expression	Thurnherr-Lee-2016
PSMC3IP	RAD51	0.00297486	Co-expression	Thurnherr-Lee-2016
PTGS1	PTGIS	0.0181665	Co-expression	Gobble-Singer-2011
TP53BP2	p53	0.015468	Co-expression	Gobble-Singer-2011
TP53BP2	PARP1	0.0144349	Co-expression	Gobble-Singer-2011
PSMC3IP	BARD1	0.0139571	Co-expression	Gobble-Singer-2011
BARD1	BRCA1	0.00981972	Co-expression	Zhang-Cheng-2020
MYB	RAD51	0.00630826	Co-expression	Zhang-Cheng-2020
BRIP1	BRCA2	0.00906232	Co-expression	Zhang-Cheng-2020
COP1	PALB2	0.00669275	Co-expression	Zhang-Cheng-2020
SIN3A	p53	0.0205441	Co-expression	Zhang-Cheng-2020
PSMC3IP	BRCA1	0.00833307	Co-expression	Zhang-Cheng-2020
p53	PTGES2	0.0130415	Co-expression	Smirnov-Cheung-2009
PARP1	RAD51	0.0197117	Co-expression	Smirnov-Cheung-2009
BRIP1	BRCA2	0.00797273	Co-expression	Smirnov-Cheung-2009
MYB	PTGS2	0.0193748	Co-expression	Nakayama-Hasegawa-2007
PTGS1	TBXAS1	0.00645	Co-expression	Nakayama-Hasegawa-2007
PSMC3IP	BARD1	0.0147437	Co-expression	Nakayama-Hasegawa-2007
PARP1	BRCA1	0.00898801	Co-expression	Toedter-Baribaud-2011
PARP1	BARD1	0.00854931	Co-expression	Toedter-Baribaud-2011
BLM	BRCA2	0.0114242	Co-expression	Toedter-Baribaud-2011
BLM	BRCA1	0.0103388	Co-expression	Toedter-Baribaud-2011
BLM	DMC1	0.00710796	Co-expression	Toedter-Baribaud-2011
RAD51	BRCA2	0.0161609	Co-expression	Peng-Katze-2009
BRIP1	BRCA2	0.0285948	Co-expression	Peng-Katze-2009
PSMC3IP	BRIP1	0.0179029	Co-expression	Peng-Katze-2009
p53	BRCA2	0.000314954	Co-expression	Newman-Radeke-2012
BRCA1	BRCA2	0.000924342	Co-expression	Newman-Radeke-2012
MYB	PTGS2	0.0162426	Co-expression	Newman-Radeke-2012
DMC1	BRCA2	0.00154651	Co-expression	Newman-Radeke-2012
BRIP1	BRCA2	0.00128231	Co-expression	Newman-Radeke-2012
COP1	PARP1	0.00695315	Co-expression	Newman-Radeke-2012
RAD51	BRCA2	0.0154237	Co-expression	Noble-Diehl-2008
BLM	MDM2	0.0161099	Co-expression	Noble-Diehl-2008
PSMC3IP	BARD1	0.0179199	Co-expression	Noble-Diehl-2008
BRIP1	BRCA2	0.0102573	Co-expression	Gysin-McMahon-2012
BLM	RAD51	0.0155552	Co-expression	Gysin-McMahon-2012
BLM	PARP1	0.00457529	Co-expression	Gysin-McMahon-2012
PSMC3IP	BRCA1	0.0161807	Co-expression	Gysin-McMahon-2012
MYB	p53	0.0165525	Co-expression	Garber-Petersen-2001
COP1	BRCA1	0.0151512	Co-expression	Garber-Petersen-2001
TP53BP2	BRCA2	0.00765596	Co-expression	Garber-Petersen-2001
RAD51	BRCA2	0.0103145	Co-expression	Noble-Diehl-2010
BRIP1	BRCA2	0.0128274	Co-expression	Noble-Diehl-2010
PSMC3IP	BARD1	0.0130063	Co-expression	Noble-Diehl-2010
RAD51	BRCA1	0.0037986	Co-expression	Feng-Cheng-2014
BARD1	BRCA1	0.00923293	Co-expression	Feng-Cheng-2014
BRIP1	BRCA2	0.00480675	Co-expression	Feng-Cheng-2014
BLM	BRCA1	0.00645274	Co-expression	Feng-Cheng-2014
BLM	RAD51	0.00406814	Co-expression	Feng-Cheng-2014
COP1	PARP1	0.0080193	Co-expression	Feng-Cheng-2014
COP1	SEM1	0.00755117	Co-expression	Feng-Cheng-2014
PSMC3IP	BRCA1	0.0079353	Co-expression	Feng-Cheng-2014
PSMC3IP	RAD51	0.00519962	Co-expression	Feng-Cheng-2014
TP53BP2	p53	0.00570534	Co-expression	Sun-Troester-2013
TP53BP2	PALB2	0.00795796	Co-expression	Sun-Troester-2013
BRCA1	BRCA2	0.0127477	Co-expression	Li-Bleecker-2015
DMC1	RAD51	0.0109588	Co-expression	Li-Bleecker-2015
IRF9	p53	0.00620446	Co-expression	Li-Bleecker-2015
SIN3A	IRF9	0.0121903	Co-expression	Li-Bleecker-2015
TP53BP2	PALB2	0.00415601	Co-expression	Li-Bleecker-2015
TP53BP2	SIN3A	0.00923328	Co-expression	Li-Bleecker-2015
PSMC3IP	BRCA1	0.0164395	Co-expression	Li-Bleecker-2015
PSMC3IP	RAD51	0.00873507	Co-expression	Li-Bleecker-2015
COP1	PARP1	0.00740345	Co-expression	Lee-Fine-2006
BRCA1	BRCA2	0.0179881	Co-expression	Stirewalt-Radich-2008
PARP1	p53	0.00797078	Co-expression	Stirewalt-Radich-2008
BRIP1	BRCA2	0.0200694	Co-expression	Stirewalt-Radich-2008
BRIP1	BRCA1	0.0141898	Co-expression	Stirewalt-Radich-2008
BRIP1	BARD1	0.0164756	Co-expression	Stirewalt-Radich-2008
BLM	BRCA2	0.0126961	Co-expression	Stirewalt-Radich-2008
BLM	BRCA1	0.00964398	Co-expression	Stirewalt-Radich-2008
BLM	PALB2	0.00540698	Co-expression	Stirewalt-Radich-2008
BLM	BARD1	0.00954776	Co-expression	Stirewalt-Radich-2008
PSMC3IP	BRCA1	0.0162079	Co-expression	Stirewalt-Radich-2008
BRCA1	BRCA2	0.00517915	Co-expression	Coelho-Hearing-2015
RAD51	BRCA2	0.00488757	Co-expression	Coelho-Hearing-2015
RAD51	BRCA1	0.00504278	Co-expression	Coelho-Hearing-2015
DMC1	BRCA2	0.0102111	Co-expression	Coelho-Hearing-2015
DMC1	BRCA1	0.0106227	Co-expression	Coelho-Hearing-2015
DMC1	RAD51	0.00856365	Co-expression	Coelho-Hearing-2015
BRIP1	BRCA2	0.00939091	Co-expression	Coelho-Hearing-2015
BLM	BRCA2	0.00426338	Co-expression	Coelho-Hearing-2015
BLM	BRCA1	0.00386606	Co-expression	Coelho-Hearing-2015
BLM	RAD51	0.00372836	Co-expression	Coelho-Hearing-2015
SIN3A	BARD1	0.00449724	Co-expression	Coelho-Hearing-2015
TP53BP2	PALB2	0.00202378	Co-expression	Coelho-Hearing-2015
TP53BP2	COP1	0.00701862	Co-expression	Coelho-Hearing-2015
BRCA1	BRCA2	0.0186916	Co-expression	Salaverria-Siebert-2011
PARP1	p53	0.0102819	Co-expression	Salaverria-Siebert-2011
DMC1	BRCA2	0.0201303	Co-expression	Salaverria-Siebert-2011
DMC1	RAD51	0.0271266	Co-expression	Salaverria-Siebert-2011
DMC1	BARD1	0.0133239	Co-expression	Salaverria-Siebert-2011
BRIP1	BARD1	0.013772	Co-expression	Salaverria-Siebert-2011
BRIP1	DMC1	0.0217307	Co-expression	Salaverria-Siebert-2011
MYB	PALB2	0.0122801	Co-expression	Sheffer-Domany-2009 B
BLM	BRCA1	0.0106436	Co-expression	Sheffer-Domany-2009 B
BLM	RAD51	0.0127192	Co-expression	Sheffer-Domany-2009 B
COP1	PTGS1	0.0130623	Co-expression	Iyer-Brown-1999
BRIP1	BRCA2	0.00469892	Co-expression	Sun-Fine-2006
BRIP1	BRCA1	0.00698089	Co-expression	Sun-Fine-2006
BRIP1	MYB	0.0106551	Co-expression	Sun-Fine-2006
BLM	TP53BP1	0.0186982	Co-expression	Sun-Fine-2006
PSMC3IP	BRCA1	0.00926588	Co-expression	Sun-Fine-2006
PSMC3IP	BRIP1	0.00514698	Co-expression	Sun-Fine-2006
COP1	SEM1	0.014559	Co-expression	Raue-Trappe-2012
PARP1	BARD1	0.0106155	Co-expression	Yu-Tan-2008
BLM	BRCA2	0.0104466	Co-expression	Yu-Tan-2008
BLM	BRCA1	0.00779988	Co-expression	Yu-Tan-2008
BLM	BRIP1	0.00701273	Co-expression	Yu-Tan-2008
PSMC3IP	BRCA1	0.0371621	Co-expression	Yu-Tan-2008
PSMC3IP	BLM	0.00862464	Co-expression	Yu-Tan-2008
BLM	BRIP1	0.0146161	Co-expression	Salas-Chibon-2015
BRIP1	BRCA2	0.0142417	Co-expression	Harms-Bichakjian-2013
BLM	BRCA2	0.0125902	Co-expression	Harms-Bichakjian-2013
SIN3A	PALB2	0.011228	Co-expression	Harms-Bichakjian-2013
PSMC3IP	BLM	0.00767214	Co-expression	Harms-Bichakjian-2013
p53	PTGES2	0.0136016	Co-expression	Chowdary-Mazumder-2006
PALB2	BRCA1	0.0190533	Co-expression	Chowdary-Mazumder-2006
PARP1	PALB2	0.015098	Co-expression	Chowdary-Mazumder-2006
BLM	BRCA1	0.00969761	Co-expression	Chowdary-Mazumder-2006
TP53BP2	PARP1	0.0153682	Co-expression	Chowdary-Mazumder-2006
PSMC3IP	BRIP1	0.0166994	Co-expression	Chowdary-Mazumder-2006
PSMC3IP	BLM	0.0103313	Co-expression	Chowdary-Mazumder-2006
BRIP1	BRCA2	0.0267044	Co-expression	Swan-Spiller-2013
BLM	BRCA1	0.0164878	Co-expression	Swan-Spiller-2013
BLM	BRIP1	0.01517	Co-expression	Swan-Spiller-2013
RAD51	PALB2	0.00453075	Co-expression	Stratford-Yeh-2010
BARD1	RAD51	0.0104039	Co-expression	Stratford-Yeh-2010
SEM1	BRCA2	0.0110087	Co-expression	Stratford-Yeh-2010
BRIP1	BRCA2	0.00819221	Co-expression	Stratford-Yeh-2010
BRIP1	BRCA1	0.00713866	Co-expression	Stratford-Yeh-2010
BLM	BRCA2	0.00617836	Co-expression	Stratford-Yeh-2010
SIN3A	BLM	0.00597029	Co-expression	Stratford-Yeh-2010
BLM	BRCA2	0.012184	Co-expression	Wang-McClelland-2010 A
BLM	BRIP1	0.0152017	Co-expression	Wang-McClelland-2010 A
TP53BP2	TP53BP1	0.0139019	Co-expression	Wang-McClelland-2010 A
COP1	PARP1	0.0101798	Co-expression	Postel-Vinay-Delattre-2012
PSMC3IP	BRIP1	0.00734462	Co-expression	Postel-Vinay-Delattre-2012
PSMC3IP	BLM	0.00474983	Co-expression	Postel-Vinay-Delattre-2012
RAD51	BRCA2	0.00902343	Co-expression	Yu-Lee-2012
BRIP1	RAD51	0.00823012	Co-expression	Yu-Lee-2012
MYB	BARD1	0.0111112	Co-expression	Hochstenbach-van Delft-2012
BLM	BARD1	0.0306056	Co-expression	Hochstenbach-van Delft-2012
TP53BP2	BARD1	0.0227003	Co-expression	Hochstenbach-van Delft-2012
TP53BP2	PTGS2	0.00638111	Co-expression	Lucas-Chute-2014
TP53BP2	BRCA2	0.00919626	Co-expression	Lucas-Chute-2014
RAD51	PALB2	0.00771352	Co-expression	Singh-Celli-2011
BRIP1	BARD1	0.0102572	Co-expression	Singh-Celli-2011
BLM	MDM2	0.012442	Co-expression	Singh-Celli-2011
COP1	BRCA1	0.0128137	Co-expression	Singh-Celli-2011
TP53BP1	PALB2	0.00814013	Co-expression	Scatolini-Chiorino-2010
PARP1	RAD51	0.00662358	Co-expression	Scatolini-Chiorino-2010
TBXAS1	SEM1	0.0175655	Co-expression	Scatolini-Chiorino-2010
COP1	PALB2	0.00844122	Co-expression	Scatolini-Chiorino-2010
TP53BP2	PALB2	0.00198959	Co-expression	Scatolini-Chiorino-2010
TP53BP2	COP1	0.00596396	Co-expression	Scatolini-Chiorino-2010
PARP1	PALB2	0.00987818	Co-expression	Liu-Hsieh-2012
BRIP1	BRCA2	0.0194429	Co-expression	Liu-Hsieh-2012
BRIP1	DMC1	0.0181731	Co-expression	Liu-Hsieh-2012
BLM	RAD51	0.00638512	Co-expression	Liu-Hsieh-2012
BLM	BARD1	0.0132893	Co-expression	Liu-Hsieh-2012
BLM	BRIP1	0.0125253	Co-expression	Liu-Hsieh-2012
COP1	PALB2	0.00797674	Co-expression	Liu-Hsieh-2012
COP1	PARP1	0.0109646	Co-expression	Liu-Hsieh-2012
TP53BP2	COP1	0.00695939	Co-expression	Liu-Hsieh-2012
BARD1	BRCA1	0.0109289	Co-expression	Tian-Shaughnessy-2003 B
TP53BP2	PARP1	0.0154527	Co-expression	Tian-Shaughnessy-2003 B
PSMC3IP	BARD1	0.00591121	Co-expression	Tian-Shaughnessy-2003 B
PSMC3IP	DMC1	0.0236459	Co-expression	Tian-Shaughnessy-2003 B
SEM1	MDM2	0.00416601	Co-expression	Honda-Kaneko-2010
TBXAS1	PTGS2	0.00887692	Co-expression	Honda-Kaneko-2010
COP1	p53	0.00901326	Co-expression	Honda-Kaneko-2010
PSMC3IP	PARP1	0.0109723	Co-expression	Honda-Kaneko-2010
BRCA1	BRCA2	0.00557631	Co-expression	Gómez-Abad-Piris-2011
RAD51	BRCA1	0.00461954	Co-expression	Gómez-Abad-Piris-2011
BARD1	BRCA2	0.0114519	Co-expression	Gómez-Abad-Piris-2011
PARP1	BRCA1	0.00529718	Co-expression	Gómez-Abad-Piris-2011
DMC1	BRCA1	0.00772289	Co-expression	Gómez-Abad-Piris-2011
BRIP1	BRCA1	0.00446115	Co-expression	Gómez-Abad-Piris-2011
BRIP1	DMC1	0.0110637	Co-expression	Gómez-Abad-Piris-2011
BLM	BRCA1	0.00596986	Co-expression	Gómez-Abad-Piris-2011
BLM	PARP1	0.00966561	Co-expression	Gómez-Abad-Piris-2011
COP1	BARD1	0.0137188	Co-expression	Gómez-Abad-Piris-2011
PSMC3IP	BRCA1	0.00562306	Co-expression	Gómez-Abad-Piris-2011
PSMC3IP	RAD51	0.00654583	Co-expression	Gómez-Abad-Piris-2011
IRF9	PTGES2	0.00569883	Co-expression	Yao-Jallal-2008
BLM	BRCA2	0.0113728	Co-expression	Yao-Jallal-2008
BLM	RAD51	0.0118251	Co-expression	Yao-Jallal-2008
PSMC3IP	BLM	0.0117265	Co-expression	Yao-Jallal-2008
PTGS1	TBXAS1	0.0138927	Co-expression	Berchtold-Cotman-2008
BLM	MDM2	0.0061129	Co-expression	Jones-Libermann-2005
TP53BP2	SIN3A	0.0190825	Co-expression	Nair-Abecasis-2009
RAD51	p53	0.0232318	Co-expression	Naesens-Sarwal-2011
BARD1	BRCA2	0.0216258	Co-expression	Naesens-Sarwal-2011
BLM	MYB	0.0156338	Co-expression	Naesens-Sarwal-2011
PSMC3IP	COP1	0.00378529	Co-expression	Naesens-Sarwal-2011
PSMC3IP	SIN3A	0.00614015	Co-expression	Naesens-Sarwal-2011
BLM	BRCA2	0.00333011	Co-expression	Sears-Subramaniam-2009
BLM	DMC1	0.0035313	Co-expression	Sears-Subramaniam-2009
BRCA1	BRCA2	0.00817556	Co-expression	Skrzypczak-Ostrowsk-2010
BRIP1	BRCA1	0.00867003	Co-expression	Skrzypczak-Ostrowsk-2010
BRIP1	BARD1	0.0207418	Co-expression	Skrzypczak-Ostrowsk-2010
BLM	BRCA1	0.00696822	Co-expression	Skrzypczak-Ostrowsk-2010
BLM	RAD51	0.0107227	Co-expression	Skrzypczak-Ostrowsk-2010
BLM	BRIP1	0.00915531	Co-expression	Skrzypczak-Ostrowsk-2010
SIN3A	TP53BP1	0.0233093	Co-expression	Skrzypczak-Ostrowsk-2010
BRCA1	BRCA2	0.0106023	Co-expression	Lai-Park-2014
BARD1	RAD51	0.010514	Co-expression	Lai-Park-2014
TBXAS1	PTGS2	0.00507685	Co-expression	Lai-Park-2014
PTGS1	PTGS2	0.00689915	Co-expression	Lai-Park-2014
PTGS1	TBXAS1	0.0152775	Co-expression	Lai-Park-2014
BRIP1	BRCA1	0.00986543	Co-expression	Lai-Park-2014
BLM	PALB2	0.0113427	Co-expression	Lai-Park-2014
BLM	RAD51	0.00771753	Co-expression	Lai-Park-2014
PSMC3IP	BRCA2	0.00781468	Co-expression	Lai-Park-2014
PSMC3IP	RAD51	0.00541175	Co-expression	Lai-Park-2014
PSMC3IP	BRIP1	0.00728544	Co-expression	Lai-Park-2014
p53	PTGES2	0.0088371	Co-expression	Hegde-Luini-2015
PARP1	BRCA1	0.0122452	Co-expression	Hegde-Luini-2015
PTGDS	TBXAS1	0.0130608	Co-expression	Hegde-Luini-2015
BRIP1	BARD1	0.0091518	Co-expression	Hegde-Luini-2015
PSMC3IP	DMC1	0.0196055	Co-expression	Tian-Shaughnessy-2003 A
PARP1	p53	0.00738	Co-expression	Einecke-Halloran-2010
BRIP1	BRCA2	0.0242737	Co-expression	Einecke-Halloran-2010
BLM	RAD51	0.0133613	Co-expression	Einecke-Halloran-2010
TP53BP2	COP1	0.0140898	Co-expression	Einecke-Halloran-2010
PTGIS	TBXAS1	0.0115176	Co-expression	Solimena-Marchetti-2018 A
RAD51	BRCA1	0.0301666	Co-expression	Bigler-Russell-2013
MDM2	BRCA2	0.0130473	Co-expression	Bigler-Russell-2013
TBXAS1	BRCA1	0.00862085	Co-expression	Van Loon-Naesens-2019
BRIP1	BRCA2	0.0247146	Co-expression	Van Loon-Naesens-2019
BLM	RAD51	0.0248361	Co-expression	Van Loon-Naesens-2019
COP1	PTGS2	0.00870219	Co-expression	Van Loon-Naesens-2019
BRCA1	BRCA2	0.00427426	Co-expression	Phatak-Kopelovich-2019
PARP1	BRCA1	0.00522478	Co-expression	Phatak-Kopelovich-2019
BRIP1	BRCA2	0.00416818	Co-expression	Phatak-Kopelovich-2019
BRIP1	BRCA1	0.00409385	Co-expression	Phatak-Kopelovich-2019
BRIP1	RAD51	0.0109597	Co-expression	Phatak-Kopelovich-2019
BLM	BRCA2	0.00455122	Co-expression	Phatak-Kopelovich-2019
BLM	BRCA1	0.00469035	Co-expression	Phatak-Kopelovich-2019
BLM	RAD51	0.0126999	Co-expression	Phatak-Kopelovich-2019
BLM	BRIP1	0.0043315	Co-expression	Phatak-Kopelovich-2019
SIN3A	PARP1	0.0118502	Co-expression	Phatak-Kopelovich-2019
PSMC3IP	PARP1	0.00976632	Co-expression	Phatak-Kopelovich-2019
PSMC3IP	DMC1	0.0189918	Co-expression	Phatak-Kopelovich-2019
SEM1	MDM2	0.013099	Co-expression	Voraphani-Wenzel-2014
BRIP1	BRCA2	0.0121999	Co-expression	Voraphani-Wenzel-2014
BLM	BRCA2	0.005732	Co-expression	Voraphani-Wenzel-2014
BLM	RAD51	0.00498762	Co-expression	Voraphani-Wenzel-2014
PSMC3IP	BRCA1	0.0141959	Co-expression	Voraphani-Wenzel-2014
PARP1	BRCA1	0.013835	Co-expression	Kabbarah-Chin-2010
BLM	BRCA1	0.0128589	Co-expression	Kabbarah-Chin-2010
BLM	RAD51	0.0159866	Co-expression	Kabbarah-Chin-2010
MDM2	p53	0.00784553	Co-expression	Whitfield-Botstein-2002
SEM1	BRCA2	0.00698821	Co-expression	Haugen-Van Houten-2010
SEM1	PARP1	0.00408376	Co-expression	Haugen-Van Houten-2010
TP53BP2	PARP1	0.0148306	Co-expression	D'Alfonso-Shin-2013
PSMC3IP	MDM2	0.0186794	Co-expression	D'Alfonso-Shin-2013
PSMC3IP	TP53BP1	0.0164597	Co-expression	D'Alfonso-Shin-2013
PTGS1	PTGS2	0.0230555	Co-expression	Watanabe-Nagawa-2007
BRCA1	BRCA2	0.00551371	Co-expression	Kim-Paik-2011
BLM	BRCA1	0.00445706	Co-expression	Brodmerkel-Krueger-2019 B
BLM	RAD51	0.0060749	Co-expression	Brodmerkel-Krueger-2019 B
BLM	BRIP1	0.00647404	Co-expression	Brodmerkel-Krueger-2019 B
PARP1	PTGES2	0.00876248	Co-expression	Vallat-Bahram-2013
BLM	BRIP1	0.015938	Co-expression	Vallat-Bahram-2013
BLM	BRCA1	0.0115949	Co-expression	Sheffer-Domany-2009 A
BLM	RAD51	0.0143098	Co-expression	Sheffer-Domany-2009 A
BARD1	BRCA2	0.0135424	Co-expression	Lv-Zhang-2017
SEM1	PARP1	0.0148922	Co-expression	Lv-Zhang-2017
BRIP1	BRCA2	0.0174191	Co-expression	Lv-Zhang-2017
BLM	BRCA1	0.0095895	Co-expression	Lv-Zhang-2017
BLM	RAD51	0.010499	Co-expression	Lv-Zhang-2017
BLM	BRIP1	0.0158965	Co-expression	Tabchy-Pusztai-2010
BRCA1	BRCA2	0.00642612	Co-expression	de Sousa E Melo-Medema-2011
MDM2	p53	0.0146337	Co-expression	de Sousa E Melo-Medema-2011
BRIP1	BRCA2	0.0114812	Co-expression	de Sousa E Melo-Medema-2011
BLM	BRCA1	0.00529117	Co-expression	de Sousa E Melo-Medema-2011
BLM	RAD51	0.0124137	Co-expression	de Sousa E Melo-Medema-2011
TP53BP2	COP1	0.0116493	Co-expression	de Sousa E Melo-Medema-2011
PSMC3IP	BRCA1	0.00434142	Co-expression	de Sousa E Melo-Medema-2011
IRF9	PALB2	0.00587127	Co-expression	Brunner-Guttman-Yassky-2018
BLM	BRIP1	0.0109519	Co-expression	Brunner-Guttman-Yassky-2018
BRCA1	BRCA2	0.0203932	Co-expression	Shalhoub-Martin-2010
BARD1	RAD51	0.0298373	Co-expression	Shalhoub-Martin-2010
PARP1	BARD1	0.00656259	Co-expression	Shalhoub-Martin-2010
SEM1	PARP1	0.00285922	Co-expression	Shalhoub-Martin-2010
BLM	RAD51	0.0279016	Co-expression	Shalhoub-Martin-2010
BLM	BARD1	0.0260066	Co-expression	Shalhoub-Martin-2010
PSMC3IP	BRIP1	0.0163145	Co-expression	Shalhoub-Martin-2010
RAD51	BRCA2	0.0301562	Co-expression	Day-Maxwell-2011
PTGDS	TBXAS1	0.0187494	Co-expression	Day-Maxwell-2011
BLM	BRCA2	0.00984824	Co-expression	Day-Maxwell-2011
BLM	BRCA1	0.0101885	Co-expression	Day-Maxwell-2011
BLM	BRIP1	0.0095127	Co-expression	Day-Maxwell-2011
TP53BP2	PARP1	0.0045503	Co-expression	Day-Maxwell-2011
TP53BP2	COP1	0.00826038	Co-expression	Day-Maxwell-2011
PSMC3IP	BLM	0.00813417	Co-expression	Day-Maxwell-2011
PARP1	BRCA1	0.00804602	Co-expression	Smirnov-Cheung-2012
PARP1	BARD1	0.00776093	Co-expression	Smirnov-Cheung-2012
BRIP1	BRCA2	0.0269182	Co-expression	Smirnov-Cheung-2012
BRIP1	PALB2	0.0150441	Co-expression	Smirnov-Cheung-2012
BLM	PALB2	0.0162709	Co-expression	Smirnov-Cheung-2012
TP53BP2	BARD1	0.0254486	Co-expression	Smirnov-Cheung-2012
PTGS1	TBXAS1	0.0184196	Co-expression	Karn-Rody-2010
BLM	BRCA2	0.00854478	Co-expression	Karn-Rody-2010
BLM	RAD51	0.0106163	Co-expression	Karn-Rody-2010
TP53BP2	BARD1	0.00956634	Co-expression	Karn-Rody-2010
TP53BP2	PARP1	0.00979467	Co-expression	Karn-Rody-2010
PSMC3IP	BRCA1	0.0281902	Co-expression	Karn-Rody-2010
PALB2	p53	0.00984902	Co-expression	Savola-Vakkila-2011
SEM1	PARP1	0.00558892	Co-expression	Savola-Vakkila-2011
BRIP1	BRCA2	0.0177864	Co-expression	Savola-Vakkila-2011
BRIP1	PARP1	0.00642996	Co-expression	Savola-Vakkila-2011
TP53BP2	COP1	0.014937	Co-expression	Savola-Vakkila-2011
PSMC3IP	PARP1	0.010476	Co-expression	Savola-Vakkila-2011
PTGS1	TBXAS1	0.0207563	Co-expression	Melis-Farci-2014
BLM	RAD51	0.0144849	Co-expression	Melis-Farci-2014
COP1	PARP1	0.00860424	Co-expression	Melis-Farci-2014
TP53BP2	PARP1	0.00572111	Co-expression	Melis-Farci-2014
BRCA1	BRCA2	0.0087554	Co-expression	Horiuchi-Sawa-2016
BRIP1	BRCA2	0.00722859	Co-expression	Horiuchi-Sawa-2016
BRCA1	BRCA2	0.0212667	Co-expression	Barretina-Singer-2010
BRIP1	BARD1	0.00551086	Co-expression	Barretina-Singer-2010
BRIP1	DMC1	0.0124116	Co-expression	Barretina-Singer-2010
PSMC3IP	BARD1	0.010814	Co-expression	Barretina-Singer-2010
PARP1	PALB2	0.0215144	Co-expression	Brunner-Guttman-Yassky-2019
BRIP1	BRCA1	0.0243567	Co-expression	Brunner-Guttman-Yassky-2019
BLM	BRCA1	0.00746472	Co-expression	Brunner-Guttman-Yassky-2019
BLM	BRIP1	0.00685076	Co-expression	Brunner-Guttman-Yassky-2019
PARP1	TP53BP1	0.0109981	Co-expression	Thomas-Potter-2015
BLM	BARD1	0.0170373	Co-expression	Thomas-Potter-2015
PARP1	p53	0.0102893	Co-expression	Radtke-Downing-2009
PTGS1	PTGS2	0.0104014	Co-expression	Radtke-Downing-2009
BRIP1	BRCA2	0.013273	Co-expression	Radtke-Downing-2009
PTGDS	PTGIS	0.00907929	Co-expression	Solimena-Marchetti-2018 C
PARP1	p53	0.00796702	Co-expression	Holleman-Evans-2004
SEM1	MYB	0.0136162	Co-expression	Holleman-Evans-2004
TP53BP2	BARD1	0.0128686	Co-expression	Minn-Massagué-2005
TP53BP2	PARP1	0.0143082	Co-expression	Minn-Massagué-2005
COP1	PARP1	0.0242447	Co-expression	Niu-Wang-2010
PALB2	p53	0.0144976	Co-expression	Chang-Katzenellenbogen-2008
BLM	BRCA1	0.0110912	Co-expression	Chang-Katzenellenbogen-2008
BLM	BARD1	0.0113458	Co-expression	Chang-Katzenellenbogen-2008
PALB2	BRCA2	0.0165174	Co-expression	Matlawska-Wasowska-Winter-2016
BARD1	BRCA2	0.0180289	Co-expression	Matlawska-Wasowska-Winter-2016
BRIP1	BRCA2	0.0159395	Co-expression	Matlawska-Wasowska-Winter-2016
BRIP1	BARD1	0.0167986	Co-expression	Matlawska-Wasowska-Winter-2016
BLM	BRCA2	0.0197741	Co-expression	Matlawska-Wasowska-Winter-2016
BLM	PALB2	0.024198	Co-expression	Matlawska-Wasowska-Winter-2016
BLM	BARD1	0.0232324	Co-expression	Matlawska-Wasowska-Winter-2016
BLM	BRIP1	0.0182633	Co-expression	Matlawska-Wasowska-Winter-2016
PSMC3IP	RAD51	0.0242575	Co-expression	Matlawska-Wasowska-Winter-2016
TP53BP1	BARD1	0.00475908	Co-expression	Tateno-Hirabayashi-2013
BLM	BRCA2	0.00753336	Co-expression	Tateno-Hirabayashi-2013
SIN3A	MYB	0.0141391	Co-expression	Tateno-Hirabayashi-2013
TP53BP2	TP53BP1	0.0110287	Co-expression	Tateno-Hirabayashi-2013
PSMC3IP	PALB2	0.0031433	Co-expression	Tateno-Hirabayashi-2013
PARP1	BRCA2	0.0106688	Co-expression	Freedman-Nevins-2011
BRIP1	BRCA2	0.0221195	Co-expression	Freedman-Nevins-2011
BRIP1	BARD1	0.0126968	Co-expression	Freedman-Nevins-2011
BRIP1	BRCA2	0.0151361	Co-expression	Ooi-Tan-2009
BLM	DMC1	0.00613381	Co-expression	Ooi-Tan-2009
COP1	PARP1	0.00495935	Co-expression	Ooi-Tan-2009
TP53BP2	PARP1	0.00789272	Co-expression	Ooi-Tan-2009
TP53BP2	COP1	0.00836658	Co-expression	Ooi-Tan-2009
TP53BP2	MYB	0.00481016	Co-expression	Agnelli-Neri-2009
PSMC3IP	PALB2	0.00496642	Co-expression	Compagno-Pasqualucci-2009
PSMC3IP	DMC1	0.0162407	Co-expression	Compagno-Pasqualucci-2009
BRCA1	BRCA2	0.0162556	Co-expression	Hirabayashi-Kiyokawa-2017
BARD1	BRCA2	0.0156148	Co-expression	Hirabayashi-Kiyokawa-2017
SEM1	MYB	0.0065655	Co-expression	Hirabayashi-Kiyokawa-2017
DMC1	BRCA2	0.0180215	Co-expression	Hirabayashi-Kiyokawa-2017
DMC1	BRCA1	0.0130234	Co-expression	Hirabayashi-Kiyokawa-2017
BRIP1	BRCA2	0.0137644	Co-expression	Hirabayashi-Kiyokawa-2017
BRIP1	BRCA1	0.00977875	Co-expression	Hirabayashi-Kiyokawa-2017
BRIP1	BARD1	0.00990017	Co-expression	Hirabayashi-Kiyokawa-2017
BRIP1	DMC1	0.0108124	Co-expression	Hirabayashi-Kiyokawa-2017
COP1	SEM1	0.00764174	Co-expression	Hirabayashi-Kiyokawa-2017
PSMC3IP	BRIP1	0.0110046	Co-expression	Hirabayashi-Kiyokawa-2017
COP1	PARP1	0.00538446	Co-expression	Pajtler-Pfister-2015
SIN3A	SEM1	0.0198042	Co-expression	Pajtler-Pfister-2015
TP53BP2	PARP1	0.00582195	Co-expression	Pajtler-Pfister-2015
PSMC3IP	BRCA1	0.0276022	Co-expression	Pajtler-Pfister-2015
PARP1	p53	0.010512	Co-expression	Xu-Shannon-2013
PTGS1	PTGS2	0.0116178	Co-expression	Xu-Shannon-2013
BRIP1	BRCA2	0.0150181	Co-expression	Xu-Shannon-2013
SEM1	p53	0.00399442	Co-expression	Ong-Howell-2009
SEM1	MDM2	0.00834273	Co-expression	Ong-Howell-2009
SIN3A	p53	0.0174232	Co-expression	Ong-Howell-2009
PSMC3IP	MDM2	0.00609397	Co-expression	Ong-Howell-2009
PSMC3IP	SEM1	0.00124291	Co-expression	Ong-Howell-2009
BRCA1	BRCA2	0.00598274	Co-expression	Kuehner-Speit-2013
RAD51	BRCA1	0.0117161	Co-expression	Kuehner-Speit-2013
BARD1	BRCA2	0.00484673	Co-expression	Kuehner-Speit-2013
BARD1	BRCA1	0.00990221	Co-expression	Kuehner-Speit-2013
BRIP1	BRCA2	0.00359742	Co-expression	Kuehner-Speit-2013
BRIP1	BARD1	0.00564663	Co-expression	Kuehner-Speit-2013
BLM	BRCA2	0.00372761	Co-expression	Kuehner-Speit-2013
BLM	BRCA1	0.00697901	Co-expression	Kuehner-Speit-2013
BLM	BARD1	0.0060797	Co-expression	Kuehner-Speit-2013
BLM	BRIP1	0.00412648	Co-expression	Kuehner-Speit-2013
PSMC3IP	DMC1	0.00859754	Co-expression	Kuehner-Speit-2013
TP53BP2	MYB	0.0168652	Co-expression	Lee-MacDonald-2013
SEM1	PARP1	0.00775214	Co-expression	Zhang-Foekens-2009
BLM	BRCA1	0.0102678	Co-expression	Zhang-Foekens-2009
BLM	RAD51	0.0100106	Co-expression	Zhang-Foekens-2009
TP53BP2	PARP1	0.00849382	Co-expression	Zhang-Foekens-2009
PSMC3IP	BRCA1	0.0332997	Co-expression	Zhang-Foekens-2009
BRCA1	BRCA2	0.028912	Co-expression	Wang-Hui-2007
BRIP1	BRCA1	0.0154142	Co-expression	Wang-Hui-2007
COP1	PARP1	0.00454621	Co-expression	Wang-Hui-2007
TP53BP2	PARP1	0.00793222	Co-expression	Wang-Hui-2007
TP53BP2	COP1	0.00749859	Co-expression	Wang-Hui-2007
BRIP1	BRCA2	0.0250252	Co-expression	Wang-McClelland-2010 B
TP53BP2	MDM2	0.0127758	Co-expression	Cuadras-Greenberg-2002
p53	PTGES2	0.00645634	Co-expression	Zhang-Crystal-2020
BLM	BRCA2	0.0269218	Co-expression	Zhang-Crystal-2020
BLM	RAD51	0.0216473	Co-expression	Zhang-Crystal-2020
TP53BP2	PALB2	0.00395699	Co-expression	Zhang-Crystal-2020
TP53BP2	BARD1	0.00685929	Co-expression	Zhang-Crystal-2020
TP53BP2	COP1	0.00373558	Co-expression	Zhang-Crystal-2020
PSMC3IP	BRCA1	0.0223328	Co-expression	Zhang-Crystal-2020
SEM1	MYB	0.0124276	Co-expression	Homminga-Meijerink-2011
PTGS1	PTGS2	0.00518768	Co-expression	Homminga-Meijerink-2011
TP53BP2	SIN3A	0.00926914	Co-expression	Homminga-Meijerink-2011
IRF9	PALB2	0.00502462	Co-expression	Jabbari-Christiano-2016
SIN3A	IRF9	0.00668154	Co-expression	Jabbari-Christiano-2016
PALB2	BRCA1	0.00252988	Co-expression	Tomasson-Ley-2008
RAD51	BRCA1	0.0152083	Co-expression	Tomasson-Ley-2008
BARD1	PALB2	0.00450992	Co-expression	Tomasson-Ley-2008
PARP1	p53	0.00666254	Co-expression	Tomasson-Ley-2008
BRIP1	BRCA2	0.0168601	Co-expression	Tomasson-Ley-2008
BRIP1	BRCA1	0.010568	Co-expression	Tomasson-Ley-2008
BRIP1	BARD1	0.0195209	Co-expression	Tomasson-Ley-2008
BLM	BRCA1	0.0112457	Co-expression	Tomasson-Ley-2008
BLM	PALB2	0.00328293	Co-expression	Tomasson-Ley-2008
BLM	BARD1	0.0223871	Co-expression	Tomasson-Ley-2008
TP53BP2	TP53BP1	0.0058294	Co-expression	Tomasson-Ley-2008
PSMC3IP	BRCA1	0.0117361	Co-expression	Tomasson-Ley-2008
PSMC3IP	BLM	0.0158946	Co-expression	Tomasson-Ley-2008
PARP1	p53	0.00918734	Co-expression	Reeve-Halloran-2013
SEM1	MDM2	0.0138485	Co-expression	Reeve-Halloran-2013
BRIP1	BRCA2	0.0230433	Co-expression	Reeve-Halloran-2013
BLM	RAD51	0.0123123	Co-expression	Reeve-Halloran-2013
TP53BP2	COP1	0.0116966	Co-expression	Reeve-Halloran-2013
MYB	RAD51	0.0138033	Co-expression	Kalikstad-Isaksson-2017
BRIP1	BRCA1	0.0110806	Co-expression	Kalikstad-Isaksson-2017
BRCA1	BRCA2	0.00991444	Co-expression	Chen-Zhao-2008
PARP1	p53	0.00804767	Co-expression	Chen-Zhao-2008
BRIP1	BRCA2	0.00687667	Co-expression	Chen-Zhao-2008
BRIP1	BARD1	0.00711558	Co-expression	Chen-Zhao-2008
BLM	PARP1	0.00513386	Co-expression	Chen-Zhao-2008
COP1	PARP1	0.00602731	Co-expression	Chen-Zhao-2008
TP53BP2	COP1	0.0277224	Co-expression	Chen-Zhao-2008
PSMC3IP	BRCA1	0.0123536	Co-expression	Chen-Zhao-2008
BRCA1	BRCA2	0.0215965	Co-expression	Li-Han-2009
RAD51	BRCA1	0.0223471	Co-expression	Li-Han-2009
BARD1	RAD51	0.0131162	Co-expression	Li-Han-2009
DMC1	BRCA1	0.0224512	Co-expression	Li-Han-2009
DMC1	RAD51	0.0178694	Co-expression	Li-Han-2009
BRIP1	BRCA2	0.014948	Co-expression	Li-Han-2009
BRIP1	BRCA1	0.0125156	Co-expression	Li-Han-2009
BLM	BARD1	0.00999871	Co-expression	Li-Han-2009
PSMC3IP	BRCA1	0.0277517	Co-expression	Li-Han-2009
PSMC3IP	RAD51	0.0224692	Co-expression	Li-Han-2009
PSMC3IP	DMC1	0.022116	Co-expression	Li-Han-2009
BLM	TP53BP1	0.0169895	Co-expression	Fountzilas-Fountzilas-2013
BARD1	BRCA2	0.00883431	Co-expression	Kazmin-Pulendran-2017
RAD51	BRCA1	0.0260353	Co-expression	Herold-Gökbuget-2017 A
PARP1	p53	0.0119538	Co-expression	Herold-Gökbuget-2017 A
BRIP1	BRCA2	0.0326056	Co-expression	Herold-Gökbuget-2017 A
BLM	BRIP1	0.0205592	Co-expression	Herold-Gökbuget-2017 A
SIN3A	PARP1	0.0107908	Co-expression	Maertzdorf-Kaufmann-2011
RAD51	BRCA2	0.00848296	Co-expression	Liu-Godbout-2011
BLM	BRCA2	0.00997972	Co-expression	Liu-Godbout-2011
BLM	RAD51	0.00633191	Co-expression	Liu-Godbout-2011
SIN3A	TP53BP1	0.0203605	Co-expression	Liu-Godbout-2011
PSMC3IP	BRCA1	0.0192207	Co-expression	Liu-Godbout-2011
SEM1	MYB	0.0184137	Co-expression	Lugthart-Evans-2005
SEM1	BRCA2	0.00795915	Co-expression	Finak-Park-2008
SEM1	PARP1	0.00660826	Co-expression	Finak-Park-2008
COP1	PARP1	0.0198813	Co-expression	Finak-Park-2008
TBXAS1	SEM1	0.0119509	Co-expression	Shea-Musser-2010
TP53BP2	PTGS2	0.0112356	Co-expression	Shea-Musser-2010
DMC1	RAD51	0.0301488	Co-expression	Lenz-Staudt-2008
BRIP1	BARD1	0.0209248	Co-expression	Lenz-Staudt-2008
PSMC3IP	BRCA1	0.0164121	Co-expression	Lenz-Staudt-2008
BRCA1	BRCA2	0.00553285	Co-expression	Pfister-Pommier-2009
RAD51	BRCA1	0.00771763	Co-expression	Pfister-Pommier-2009
DMC1	RAD51	0.0119899	Co-expression	Pfister-Pommier-2009
DMC1	MYB	0.00498568	Co-expression	Pfister-Pommier-2009
PTGS1	PTGDS	0.0181385	Co-expression	Pfister-Pommier-2009
BRIP1	BRCA2	0.00605641	Co-expression	Pfister-Pommier-2009
BLM	BRCA2	0.00305656	Co-expression	Pfister-Pommier-2009
BLM	BRCA1	0.00393559	Co-expression	Pfister-Pommier-2009
BLM	RAD51	0.00442469	Co-expression	Pfister-Pommier-2009
BLM	PARP1	0.00425642	Co-expression	Pfister-Pommier-2009
BLM	BRIP1	0.00389701	Co-expression	Pfister-Pommier-2009
COP1	BRCA1	0.00970649	Co-expression	Pfister-Pommier-2009
COP1	BARD1	0.0134265	Co-expression	Pfister-Pommier-2009
SIN3A	BLM	0.00603304	Co-expression	Pfister-Pommier-2009
PSMC3IP	BRCA1	0.00863598	Co-expression	Pfister-Pommier-2009
PARP1	p53	0.00271526	Co-expression	Holland-Grimbacher-2007
PARP1	PALB2	0.00246023	Co-expression	Holland-Grimbacher-2007
BLM	BRCA2	0.0183775	Co-expression	Holland-Grimbacher-2007
BRIP1	PARP1	0.00826756	Co-expression	Williams-Gascoyne-2010
SIN3A	p53	0.00881548	Co-expression	Williams-Gascoyne-2010
PSMC3IP	MDM2	0.0116639	Co-expression	Williams-Gascoyne-2010
PSMC3IP	MYB	0.00718697	Co-expression	Williams-Gascoyne-2010
PSMC3IP	SIN3A	0.00379416	Co-expression	Williams-Gascoyne-2010
BRCA1	BRCA2	0.0152488	Co-expression	Hummel-Siebert-2006
BARD1	BRCA2	0.0116978	Co-expression	Hummel-Siebert-2006
MYB	MDM2	0.0255656	Co-expression	Hummel-Siebert-2006
TP53BP1	BARD1	0.0137347	Co-expression	Hummel-Siebert-2006
DMC1	BRCA2	0.0178218	Co-expression	Hummel-Siebert-2006
DMC1	BRCA1	0.0171599	Co-expression	Hummel-Siebert-2006
BRIP1	BRCA2	0.0146766	Co-expression	Hummel-Siebert-2006
PSMC3IP	BRCA1	0.0176955	Co-expression	Hummel-Siebert-2006
PSMC3IP	BARD1	0.0145973	Co-expression	Hummel-Siebert-2006
PSMC3IP	DMC1	0.0274685	Co-expression	Hummel-Siebert-2006
PARP1	p53	0.00455812	Co-expression	Kohlmann-Haferlach-2008 B
DMC1	BRCA1	0.0289066	Co-expression	Kohlmann-Haferlach-2008 B
BRIP1	BARD1	0.0191118	Co-expression	Kohlmann-Haferlach-2008 B
BRIP1	DMC1	0.0203845	Co-expression	Kohlmann-Haferlach-2008 B
BLM	BRIP1	0.0155419	Co-expression	Kohlmann-Haferlach-2008 B
BRIP1	BRCA2	0.00846193	Co-expression	Ariazi-Jordan-2011
BRIP1	RAD51	0.0123561	Co-expression	Ariazi-Jordan-2011
BLM	RAD51	0.0143859	Co-expression	Ariazi-Jordan-2011
BLM	BRIP1	0.010939	Co-expression	Ariazi-Jordan-2011
PSMC3IP	BRCA2	0.00433027	Co-expression	Ariazi-Jordan-2011
PSMC3IP	RAD51	0.00557998	Co-expression	Ariazi-Jordan-2011
PSMC3IP	PARP1	0.00655062	Co-expression	Ariazi-Jordan-2011
PSMC3IP	DMC1	0.00782709	Co-expression	Ariazi-Jordan-2011
PSMC3IP	BRIP1	0.00450479	Co-expression	Ariazi-Jordan-2011
BRCA1	BRCA2	0.0120396	Co-expression	Scholtysik-Küppers-2015
DMC1	BRCA2	0.0158529	Co-expression	Scholtysik-Küppers-2015
BRIP1	BRCA2	0.0119465	Co-expression	Scholtysik-Küppers-2015
BRIP1	DMC1	0.01892	Co-expression	Scholtysik-Küppers-2015
BLM	RAD51	0.0236319	Co-expression	Scholtysik-Küppers-2015
SIN3A	BLM	0.0121044	Co-expression	Berkofsky-Fessler-Hilton-2009
PSMC3IP	PARP1	0.00322951	Co-expression	Berkofsky-Fessler-Hilton-2009
BARD1	BRCA2	0.020885	Co-expression	Den Boer-Pieters-2009 A
PARP1	p53	0.00674617	Co-expression	Den Boer-Pieters-2009 A
PTGDS	PTGS2	0.0197221	Co-expression	Den Boer-Pieters-2009 A
BRIP1	BRCA1	0.0177519	Co-expression	Den Boer-Pieters-2009 A
BLM	BRIP1	0.0125909	Co-expression	Den Boer-Pieters-2009 A
COP1	PARP1	0.00672872	Co-expression	Den Boer-Pieters-2009 A
TP53BP2	SIN3A	0.00419102	Co-expression	Den Boer-Pieters-2009 A
PARP1	RAD51	0.012242	Co-expression	Kim-Green-2011 A
BRIP1	BRCA2	0.0113537	Co-expression	Kim-Green-2011 A
BLM	BRCA1	0.0179333	Co-expression	Kim-Green-2011 A
BLM	RAD51	0.0166031	Co-expression	Kim-Green-2011 A
PSMC3IP	BRCA1	0.0284376	Co-expression	Kim-Green-2011 A
RAD51	BRCA1	0.0176144	Co-expression	Winter-Larson-2007
MDM2	PTGS2	0.0155173	Co-expression	Winter-Larson-2007
PTGS1	PTGS2	0.013106	Co-expression	Winter-Larson-2007
IRF9	TP53BP1	0.00630695	Co-expression	Winter-Larson-2007
BRIP1	BRCA2	0.00863254	Co-expression	Winter-Larson-2007
BLM	BRCA2	0.0118871	Co-expression	Winter-Larson-2007
BLM	BARD1	0.0113858	Co-expression	Winter-Larson-2007
BLM	BRIP1	0.0103343	Co-expression	Winter-Larson-2007
COP1	PALB2	0.00871237	Co-expression	Winter-Larson-2007
BRCA1	BRCA2	0.0173757	Co-expression	Chibon-Aurias-2010
BRIP1	BARD1	0.00493467	Co-expression	Chibon-Aurias-2010
BLM	BRCA1	0.0135883	Co-expression	Chibon-Aurias-2010
SIN3A	BARD1	0.0103831	Co-expression	Chibon-Aurias-2010
SIN3A	BRIP1	0.0104453	Co-expression	Chibon-Aurias-2010
TP53BP2	PTGS2	0.00689698	Co-expression	Chibon-Aurias-2010
PSMC3IP	BARD1	0.00682561	Co-expression	Chibon-Aurias-2010
BRCA1	BRCA2	0.0133949	Co-expression	Ceroi-Saas-2016
PARP1	p53	0.00585758	Co-expression	Ceroi-Saas-2016
DMC1	BRCA1	0.0133644	Co-expression	Ceroi-Saas-2016
BRIP1	BRCA2	0.011642	Co-expression	Ceroi-Saas-2016
BRIP1	BRCA1	0.00695898	Co-expression	Ceroi-Saas-2016
BLM	BRCA2	0.0137197	Co-expression	Ceroi-Saas-2016
BLM	BRCA1	0.00771847	Co-expression	Ceroi-Saas-2016
BLM	BARD1	0.0081532	Co-expression	Ceroi-Saas-2016
BLM	BRIP1	0.00691417	Co-expression	Ceroi-Saas-2016
PSMC3IP	RAD51	0.0155838	Co-expression	Ceroi-Saas-2016
PARP1	p53	0.00648217	Co-expression	Verhaak-Valk-2009
BRIP1	BRCA1	0.0140577	Co-expression	Verhaak-Valk-2009
BLM	BRCA1	0.0115486	Co-expression	Verhaak-Valk-2009
BLM	BRIP1	0.0118019	Co-expression	Verhaak-Valk-2009
PSMC3IP	BRCA1	0.018756	Co-expression	Verhaak-Valk-2009
PALB2	BRCA1	0.0187337	Co-expression	Gao-Sellers-2015
DMC1	PARP1	0.00838199	Co-expression	Gao-Sellers-2015
BLM	BRCA1	0.00846346	Co-expression	Gao-Sellers-2015
BLM	RAD51	0.00900958	Co-expression	Gao-Sellers-2015
BLM	PARP1	0.00492144	Co-expression	Gao-Sellers-2015
BLM	BRIP1	0.00696676	Co-expression	Gao-Sellers-2015
SIN3A	BRIP1	0.0171332	Co-expression	Gao-Sellers-2015
SIN3A	BLM	0.00808871	Co-expression	Gao-Sellers-2015
TP53BP2	PARP1	0.00673931	Co-expression	Gao-Sellers-2015
PSMC3IP	BRCA1	0.0125981	Co-expression	Gao-Sellers-2015
PSMC3IP	DMC1	0.013222	Co-expression	Gao-Sellers-2015
BRIP1	BARD1	0.026264	Co-expression	Wei-Tan-2017
BLM	RAD51	0.0125837	Co-expression	Wei-Tan-2017
TP53BP2	COP1	0.0250723	Co-expression	Wei-Tan-2017
PSMC3IP	BRCA1	0.0314425	Co-expression	Wei-Tan-2017
p53	PTGES2	0.00478242	Co-expression	Ma-Ellis-2017
RAD51	BRCA2	0.0063896	Co-expression	Ma-Ellis-2017
RAD51	BRCA1	0.00696993	Co-expression	Ma-Ellis-2017
PTGDS	PTGIS	0.00673562	Co-expression	Ma-Ellis-2017
BRIP1	BRCA2	0.0120067	Co-expression	Ma-Ellis-2017
BRIP1	BRCA1	0.0124017	Co-expression	Ma-Ellis-2017
BRIP1	RAD51	0.00703498	Co-expression	Ma-Ellis-2017
BLM	BRCA2	0.00947866	Co-expression	Ma-Ellis-2017
BLM	BRCA1	0.0104333	Co-expression	Ma-Ellis-2017
BLM	RAD51	0.00652528	Co-expression	Ma-Ellis-2017
BLM	BARD1	0.0106025	Co-expression	Ma-Ellis-2017
BLM	BRIP1	0.0100906	Co-expression	Ma-Ellis-2017
TP53BP2	PALB2	0.0048113	Co-expression	Ma-Ellis-2017
PSMC3IP	BRCA1	0.0129541	Co-expression	Ma-Ellis-2017
PSMC3IP	RAD51	0.00735369	Co-expression	Ma-Ellis-2017
BRIP1	BRCA1	0.0189619	Co-expression	Coustan-Smith-Campana-2011
BLM	BRCA2	0.0157486	Co-expression	Coustan-Smith-Campana-2011
BLM	BRCA1	0.0112786	Co-expression	Coustan-Smith-Campana-2011
BLM	BARD1	0.0110596	Co-expression	Coustan-Smith-Campana-2011
PSMC3IP	BRCA1	0.0213591	Co-expression	Coustan-Smith-Campana-2011
PARP1	BRCA2	0.00858743	Co-expression	Iqbal-Chan-2010
SEM1	BRCA2	0.00997608	Co-expression	Iqbal-Chan-2010
SEM1	BARD1	0.0106353	Co-expression	Iqbal-Chan-2010
PARP1	p53	0.00633286	Co-expression	Wouters-Delwel-2009
BRIP1	BRCA1	0.0134902	Co-expression	Wouters-Delwel-2009
BLM	BRCA1	0.0106791	Co-expression	Wouters-Delwel-2009
BLM	BRIP1	0.0110635	Co-expression	Wouters-Delwel-2009
PSMC3IP	BRCA1	0.0187629	Co-expression	Wouters-Delwel-2009
PARP1	RAD51	0.0161678	Co-expression	Tasaki-Takeuchi-2018 B
PARP1	BARD1	0.0136598	Co-expression	Tasaki-Takeuchi-2018 B
SEM1	p53	0.00549709	Co-expression	Tasaki-Takeuchi-2018 B
TBXAS1	PTGS2	0.0046804	Co-expression	Tasaki-Takeuchi-2018 B
DMC1	MYB	0.0129618	Co-expression	Tasaki-Takeuchi-2018 B
BRCA1	p53	0.016534	Co-expression	Shahmanesh-Tomlinson-2015
PARP1	p53	0.00775058	Co-expression	Shahmanesh-Tomlinson-2015
RAD51	BRCA1	0.0245121	Co-expression	Balgobind-den Boer-2011
BARD1	BRCA2	0.026157	Co-expression	Balgobind-den Boer-2011
BLM	BRCA1	0.0111243	Co-expression	Balgobind-den Boer-2011
BLM	BARD1	0.0117408	Co-expression	Balgobind-den Boer-2011
PSMC3IP	BRCA2	0.0216457	Co-expression	Balgobind-den Boer-2011
PARP1	MYB	0.00735114	Co-expression	Sorich-Evans-2008
BRIP1	BRCA1	0.0185162	Co-expression	Sorich-Evans-2008
TP53BP2	PARP1	0.0063606	Co-expression	Sorich-Evans-2008
PSMC3IP	BRCA1	0.02321	Co-expression	Sorich-Evans-2008
PSMC3IP	BRIP1	0.0205465	Co-expression	Sorich-Evans-2008
BLM	RAD51	0.0100694	Co-expression	Creighton-Chang-2012
TP53BP2	PARP1	0.00648697	Co-expression	Creighton-Chang-2012
PSMC3IP	BARD1	0.0144397	Co-expression	Creighton-Chang-2012
BRIP1	BRCA2	0.0126266	Co-expression	Payton-Ley-2009
BRIP1	BRCA1	0.0167287	Co-expression	Payton-Ley-2009
BLM	BARD1	0.0168271	Co-expression	Payton-Ley-2009
BARD1	BRCA1	0.0112268	Co-expression	Hatzis-Symmans-2011 B
BARD1	PALB2	0.00791218	Co-expression	Hatzis-Symmans-2011 B
PTGDS	PTGIS	0.0152225	Co-expression	Hatzis-Symmans-2011 B
TP53BP2	PARP1	0.0100581	Co-expression	Hatzis-Symmans-2011 B
MYB	BARD1	0.0140838	Co-expression	Zhang-Mullighan-2012
TP53BP1	BARD1	0.0151247	Co-expression	Zhang-Mullighan-2012
BRIP1	BRCA1	0.0178795	Co-expression	Zhang-Mullighan-2012
BLM	BRCA1	0.0122145	Co-expression	Zhang-Mullighan-2012
PSMC3IP	BRCA1	0.021053	Co-expression	Zhang-Mullighan-2012
PSMC3IP	BRIP1	0.0236748	Co-expression	Zhang-Mullighan-2012
SEM1	PARP1	0.0113992	Co-expression	Hatzis-Symmans-2011 A
TP53BP2	PARP1	0.0122351	Co-expression	Hatzis-Symmans-2011 A
PSMC3IP	BARD1	0.00983275	Co-expression	Hatzis-Symmans-2011 A
RAD51	BRCA1	0.0202568	Co-expression	Kang-Willman-2010 A
PARP1	p53	0.0112546	Co-expression	Kang-Willman-2010 A
PARP1	RAD51	0.00853553	Co-expression	Kang-Willman-2010 A
BRIP1	BRCA2	0.0215894	Co-expression	Kang-Willman-2010 A
BRIP1	BARD1	0.0149499	Co-expression	Kang-Willman-2010 A
BLM	RAD51	0.0160937	Co-expression	Kang-Willman-2010 A
BLM	BRIP1	0.0116574	Co-expression	Kang-Willman-2010 A
TP53BP2	TP53BP1	0.004871	Co-expression	Kang-Willman-2010 A
PSMC3IP	BRIP1	0.0189886	Co-expression	Kang-Willman-2010 A
RAD51	BRCA1	0.0202568	Co-expression	Kang-Willman-2010 B
PARP1	p53	0.0112546	Co-expression	Kang-Willman-2010 B
PARP1	RAD51	0.00853553	Co-expression	Kang-Willman-2010 B
BRIP1	BRCA2	0.0215894	Co-expression	Kang-Willman-2010 B
BRIP1	BARD1	0.0149499	Co-expression	Kang-Willman-2010 B
BLM	RAD51	0.0160937	Co-expression	Kang-Willman-2010 B
BLM	BRIP1	0.0116574	Co-expression	Kang-Willman-2010 B
TP53BP2	TP53BP1	0.004871	Co-expression	Kang-Willman-2010 B
PSMC3IP	BRIP1	0.0189886	Co-expression	Kang-Willman-2010 B
PTGDS	PTGIS	0.011607	Co-expression	Miyake-Noguchi-2012
BLM	BRCA2	0.0046688	Co-expression	Miyake-Noguchi-2012
BLM	PALB2	0.00443978	Co-expression	Miyake-Noguchi-2012
BLM	RAD51	0.00615636	Co-expression	Miyake-Noguchi-2012
COP1	SEM1	0.00712746	Co-expression	Miyake-Noguchi-2012
TP53BP2	PARP1	0.00861189	Co-expression	Miyake-Noguchi-2012
PSMC3IP	PALB2	0.0148215	Co-expression	Miyake-Noguchi-2012
PSMC3IP	RAD51	0.0125379	Co-expression	Miyake-Noguchi-2012
PSMC3IP	BLM	0.00395875	Co-expression	Miyake-Noguchi-2012
BRIP1	BRCA2	0.0284574	Co-expression	Venet-Textoris-2017
PARP1	PALB2	0.00142742	Co-expression	Li-Bhatia-2011
SEM1	BARD1	0.0100165	Co-expression	Li-Bhatia-2011
BRIP1	PARP1	0.00481483	Co-expression	Li-Bhatia-2011
BLM	BRCA2	0.0125013	Co-expression	Li-Bhatia-2011
BLM	BARD1	0.0145437	Co-expression	Li-Bhatia-2011
BLM	PARP1	0.00165896	Co-expression	Li-Bhatia-2011
BLM	SEM1	0.00367016	Co-expression	Li-Bhatia-2011
BLM	BRIP1	0.0159191	Co-expression	Li-Bhatia-2011
COP1	PARP1	0.00438671	Co-expression	Li-Bhatia-2011
SIN3A	PALB2	0.0106352	Co-expression	Li-Bhatia-2011
PSMC3IP	PARP1	0.00409109	Co-expression	Li-Bhatia-2011
PSMC3IP	SEM1	0.00908333	Co-expression	Li-Bhatia-2011
PSMC3IP	BLM	0.0134504	Co-expression	Li-Bhatia-2011
BARD1	BRCA2	0.024906	Co-expression	Haferlach-Falini-2009
PARP1	p53	0.00468205	Co-expression	Haferlach-Falini-2009
BRIP1	BRCA2	0.0220435	Co-expression	Haferlach-Falini-2009
BLM	BRCA2	0.0181311	Co-expression	Haferlach-Falini-2009
TP53BP2	SIN3A	0.0100031	Co-expression	Haferlach-Falini-2009
PSMC3IP	DMC1	0.0175451	Co-expression	Haferlach-Falini-2009
BLM	RAD51	0.0147487	Co-expression	Bonome-Birrer-2008
PSMC3IP	BLM	0.0179541	Co-expression	Bonome-Birrer-2008
PARP1	MYB	0.00605389	Co-expression	Kannan-Zweidler-McKay-2011
DMC1	BRCA2	0.026116	Co-expression	Kannan-Zweidler-McKay-2011
BRIP1	BRCA1	0.0190609	Co-expression	Kannan-Zweidler-McKay-2011
PSMC3IP	BRCA1	0.0220824	Co-expression	Kannan-Zweidler-McKay-2011
PSMC3IP	BRIP1	0.0235843	Co-expression	Kannan-Zweidler-McKay-2011
BRIP1	RAD51	0.0243728	Co-expression	Navarro-Beà-2017
SIN3A	PARP1	0.00788412	Co-expression	Finak-Park-2006
BRCA1	BRCA2	0.0174481	Co-expression	Huang-Perlman-2009
RAD51	BRCA1	0.0191687	Co-expression	Huang-Perlman-2009
MYB	BARD1	0.019377	Co-expression	Huang-Perlman-2009
PTGS1	PTGDS	0.00874184	Co-expression	Huang-Perlman-2009
BRIP1	BRCA2	0.00899673	Co-expression	Huang-Perlman-2009
BLM	BRCA2	0.00726184	Co-expression	Huang-Perlman-2009
BLM	BRCA1	0.00827618	Co-expression	Huang-Perlman-2009
BLM	RAD51	0.0132179	Co-expression	Huang-Perlman-2009
BLM	BARD1	0.00839776	Co-expression	Huang-Perlman-2009
BLM	MYB	0.0111129	Co-expression	Huang-Perlman-2009
TP53BP2	PARP1	0.0157414	Co-expression	Huang-Perlman-2009
PSMC3IP	BRCA2	0.0170544	Co-expression	Huang-Perlman-2009
PSMC3IP	BRCA1	0.0216067	Co-expression	Huang-Perlman-2009
PSMC3IP	BLM	0.00837622	Co-expression	Huang-Perlman-2009
PTGDS	PTGIS	0.0179925	Co-expression	Shimada-Tanaka-2019
PTGS1	TBXAS1	0.0122199	Co-expression	Shimada-Tanaka-2019
BLM	RAD51	0.013009	Co-expression	Shimada-Tanaka-2019
BLM	TP53BP1	0.00691775	Co-expression	Shimada-Tanaka-2019
COP1	PARP1	0.00697455	Co-expression	Shimada-Tanaka-2019
TP53BP2	COP1	0.0118444	Co-expression	Shimada-Tanaka-2019
PTGS1	TBXAS1	0.0188734	Co-expression	Bhojwani-Carroll-2006
BLM	BRCA1	0.0170859	Co-expression	Bhojwani-Carroll-2006
BLM	BARD1	0.0105685	Co-expression	Bhojwani-Carroll-2006
BLM	SEM1	0.00470219	Co-expression	Bhojwani-Carroll-2006
PSMC3IP	BLM	0.0129357	Co-expression	Bhojwani-Carroll-2006
PARP1	p53	0.005988	Co-expression	Govoni-Singh-2020
BLM	MDM2	0.015396	Co-expression	Govoni-Singh-2020
PARP1	TP53BP1	0.0133854	Co-expression	Petruzziello-Pellegrini-Marsden-2012
BRCA1	BRCA2	0.0137652	Co-expression	Gibault-Aurias-2012
MYB	MDM2	0.0164599	Co-expression	Gibault-Aurias-2012
BRIP1	BARD1	0.00453382	Co-expression	Gibault-Aurias-2012
BLM	RAD51	0.0195544	Co-expression	Gibault-Aurias-2012
SIN3A	BARD1	0.00749541	Co-expression	Gibault-Aurias-2012
SIN3A	BRIP1	0.0101512	Co-expression	Gibault-Aurias-2012
TP53BP2	PARP1	0.0101854	Co-expression	Gibault-Aurias-2012
PSMC3IP	BRCA1	0.0154483	Co-expression	Gibault-Aurias-2012
PSMC3IP	BARD1	0.00669929	Co-expression	Gibault-Aurias-2012
RAD51	BRCA2	0.00345852	Co-expression	Dombroski-Spielman-2010
SIN3A	PALB2	0.0192789	Co-expression	Dombroski-Spielman-2010
DMC1	BRCA2	0.0392901	Co-expression	Popovici-Pusztai-2010 A
BLM	BRCA2	0.010418	Co-expression	Popovici-Pusztai-2010 A
BLM	BRCA1	0.0070229	Co-expression	Popovici-Pusztai-2010 A
BLM	RAD51	0.00873478	Co-expression	Popovici-Pusztai-2010 A
TP53BP2	PARP1	0.0118029	Co-expression	Popovici-Pusztai-2010 A
PSMC3IP	BARD1	0.0137469	Co-expression	Popovici-Pusztai-2010 A
BRIP1	BRCA2	0.0231223	Co-expression	Steidl-Gascoyne-2010
TP53BP2	PARP1	0.00463951	Co-expression	Steidl-Gascoyne-2010
BLM	RAD51	0.01221	Co-expression	Horak-Liu-2013
TP53BP2	PTGS2	0.0108988	Co-expression	Horak-Liu-2013
PSMC3IP	BRCA1	0.0243437	Co-expression	Horak-Liu-2013
PSMC3IP	BLM	0.00700316	Co-expression	Horak-Liu-2013
PALB2	BRCA1	0.0134958	Co-expression	Mullighan-Downing-2009
RAD51	BRCA1	0.0186414	Co-expression	Mullighan-Downing-2009
PARP1	MYB	0.0059055	Co-expression	Mullighan-Downing-2009
DMC1	BRCA2	0.0276082	Co-expression	Mullighan-Downing-2009
BRIP1	BRCA1	0.0164542	Co-expression	Mullighan-Downing-2009
BLM	BRCA1	0.0147202	Co-expression	Mullighan-Downing-2009
PSMC3IP	BRCA1	0.0189121	Co-expression	Mullighan-Downing-2009
PSMC3IP	BRIP1	0.0213096	Co-expression	Mullighan-Downing-2009
PTGS1	TBXAS1	0.0121444	Co-expression	Liu-Bratslavsky-2013
DMC1	RAD51	0.0215091	Co-expression	Zangrando-Basso-2009
PTGS1	TBXAS1	0.00782172	Co-expression	Zangrando-Basso-2009
BRIP1	BRCA2	0.0174129	Co-expression	Zangrando-Basso-2009
BRIP1	DMC1	0.0166504	Co-expression	Zangrando-Basso-2009
PSMC3IP	RAD51	0.0194764	Co-expression	Zangrando-Basso-2009
PSMC3IP	DMC1	0.0200856	Co-expression	Zangrando-Basso-2009
BARD1	BRCA1	0.0155647	Co-expression	Bild-Nevins-2006 C
BLM	RAD51	0.017743	Co-expression	Bild-Nevins-2006 C
TP53BP2	PARP1	0.00666585	Co-expression	Bild-Nevins-2006 C
BARD1	BRCA2	0.0159565	Co-expression	Polak-Buitenhuis-2019
DMC1	BRCA1	0.0184231	Co-expression	Polak-Buitenhuis-2019
DMC1	RAD51	0.0168481	Co-expression	Polak-Buitenhuis-2019
BRIP1	BRCA2	0.00983595	Co-expression	Polak-Buitenhuis-2019
BRIP1	BRCA1	0.00918064	Co-expression	Polak-Buitenhuis-2019
BRIP1	BARD1	0.0118288	Co-expression	Polak-Buitenhuis-2019
BRIP1	DMC1	0.0129093	Co-expression	Polak-Buitenhuis-2019
BLM	BRCA2	0.0149898	Co-expression	Polak-Buitenhuis-2019
BLM	BARD1	0.0195761	Co-expression	Polak-Buitenhuis-2019
BLM	BRIP1	0.0117665	Co-expression	Polak-Buitenhuis-2019
PSMC3IP	BRIP1	0.0117631	Co-expression	Polak-Buitenhuis-2019
PTGS1	PTGDS	0.00804252	Co-expression	Hendrix-Cho-2006
TP53BP2	PARP1	0.00301278	Co-expression	Hendrix-Cho-2006
PSMC3IP	BRCA1	0.0281466	Co-expression	Hendrix-Cho-2006
TP53BP2	BARD1	0.00889991	Co-expression	Symmans-Pusztai-2010
BRCA1	BRCA2	0.0134578	Co-expression	Wagner-Ashkenazi-2007
RAD51	BRCA2	0.0131223	Co-expression	Wagner-Ashkenazi-2007
BRIP1	BRCA1	0.0172012	Co-expression	Wagner-Ashkenazi-2007
BLM	BRCA1	0.00883061	Co-expression	Wagner-Ashkenazi-2007
BLM	PALB2	0.00912871	Co-expression	Wagner-Ashkenazi-2007
TP53BP2	PARP1	0.00959877	Co-expression	Wagner-Ashkenazi-2007
PSMC3IP	BRCA1	0.0166884	Co-expression	Wagner-Ashkenazi-2007
PSMC3IP	BRIP1	0.01516	Co-expression	Wagner-Ashkenazi-2007
TP53BP2	PARP1	0.0156349	Co-expression	Sotiriou-Delorenzi-2006
PARP1	RAD51	0.0109678	Co-expression	Dhage-Schneider-2018
PTGS1	TBXAS1	0.0245805	Co-expression	Dhage-Schneider-2018
BLM	BRCA2	0.00826928	Co-expression	Dhage-Schneider-2018
BLM	BRIP1	0.00966702	Co-expression	Dhage-Schneider-2018
TP53BP2	BARD1	0.0153307	Co-expression	Dhage-Schneider-2018
TP53BP2	PARP1	0.00603105	Co-expression	Dhage-Schneider-2018
PARP1	RAD51	0.00825494	Co-expression	Kim-Green-2011 B
BRIP1	BRCA2	0.0177703	Co-expression	Kim-Green-2011 B
BLM	BRCA1	0.0180204	Co-expression	Kim-Green-2011 B
BLM	RAD51	0.017833	Co-expression	Kim-Green-2011 B
TP53BP2	PARP1	0.00457478	Co-expression	Kim-Green-2011 B
PSMC3IP	BRCA1	0.0250812	Co-expression	Kim-Green-2011 B
PSMC3IP	RAD51	0.0246502	Co-expression	Kim-Green-2011 B
BRIP1	BRCA2	0.030099	Co-expression	Filipits-Gnant-2011
TP53BP2	PARP1	0.00664507	Co-expression	Filipits-Gnant-2011
PSMC3IP	BLM	0.0111667	Co-expression	Filipits-Gnant-2011
BLM	PALB2	0.00803755	Co-expression	Taskesen-Döhner-2011
PSMC3IP	BRIP1	0.0271904	Co-expression	Taskesen-Döhner-2011
DMC1	BRCA1	0.0224206	Co-expression	Tacchetti-Cavo-2014
BRIP1	DMC1	0.0275744	Co-expression	Tacchetti-Cavo-2014
COP1	PALB2	0.00515498	Co-expression	Tacchetti-Cavo-2014
TP53BP2	SIN3A	0.00635562	Co-expression	Tacchetti-Cavo-2014
PSMC3IP	COP1	0.0171791	Co-expression	Tacchetti-Cavo-2014
TP53BP1	PTGS2	0.0096319	Co-expression	Kohlmann-Haferlach-2008 A
PTGS1	PTGS2	0.00859348	Co-expression	Kohlmann-Haferlach-2008 A
RAD51	BRCA1	0.0230812	Co-expression	Klein-Dugas-2009
PARP1	p53	0.00735788	Co-expression	Klein-Dugas-2009
BRIP1	BRCA2	0.0231441	Co-expression	Klein-Dugas-2009
BRIP1	BRCA1	0.0165233	Co-expression	Klein-Dugas-2009
BLM	BRCA2	0.0161474	Co-expression	Klein-Dugas-2009
BLM	BRIP1	0.0124336	Co-expression	Klein-Dugas-2009
PARP1	p53	0.00761343	Co-expression	Scott-Rimsza-2014
DMC1	RAD51	0.0257826	Co-expression	Scott-Rimsza-2014
BRIP1	BARD1	0.0198775	Co-expression	Scott-Rimsza-2014
PSMC3IP	BRCA1	0.0145345	Co-expression	Scott-Rimsza-2014
PSMC3IP	TP53BP1	0.0192115	Co-expression	Scott-Rimsza-2014
TP53BP2	BARD1	0.0228109	Co-expression	Spira-Brody-2007
SIN3A	COP1	0.0198	Co-expression	Hessel-Tilley-2014
BRCA1	BRCA2	0.0152484	Co-expression	Pellagatti-Boultwood-2010
DMC1	BRCA2	0.02075	Co-expression	Pellagatti-Boultwood-2010
DMC1	BRCA1	0.0141284	Co-expression	Pellagatti-Boultwood-2010
BRIP1	BRCA2	0.0143456	Co-expression	Pellagatti-Boultwood-2010
BRIP1	BRCA1	0.0106908	Co-expression	Pellagatti-Boultwood-2010
BRIP1	DMC1	0.0160578	Co-expression	Pellagatti-Boultwood-2010
BLM	BRCA2	0.00682809	Co-expression	Pellagatti-Boultwood-2010
BLM	BRCA1	0.00604509	Co-expression	Pellagatti-Boultwood-2010
BLM	PALB2	0.00320489	Co-expression	Pellagatti-Boultwood-2010
BLM	BARD1	0.00621024	Co-expression	Pellagatti-Boultwood-2010
BLM	BRIP1	0.00489187	Co-expression	Pellagatti-Boultwood-2010
TP53BP2	SIN3A	0.00836946	Co-expression	Pellagatti-Boultwood-2010
PSMC3IP	SEM1	0.0201074	Co-expression	Pellagatti-Boultwood-2010
TP53BP2	MYB	0.0104568	Co-expression	Levy-Hessner-2012 A
TP53BP2	BARD1	0.0133596	Co-expression	Miller-Dixon-2007
RAD51	BRCA1	0.00745252	Co-expression	Cliff-Dockrell-2013
BARD1	RAD51	0.00944932	Co-expression	Cliff-Dockrell-2013
PARP1	PALB2	0.00441257	Co-expression	Cliff-Dockrell-2013
COP1	PTGS2	0.00551175	Co-expression	Cliff-Dockrell-2013
BLM	BRCA1	0.00704493	Co-expression	Suárez-Fariñas-Krueger-2012
BLM	BRIP1	0.00755263	Co-expression	Suárez-Fariñas-Krueger-2012
BRCA1	BRCA2	0.00945506	Co-expression	Stinson-Dornan-2011
PALB2	BRCA1	0.00868293	Co-expression	Stinson-Dornan-2011
RAD51	BRCA2	0.0210582	Co-expression	Stinson-Dornan-2011
BRIP1	BRCA1	0.00758486	Co-expression	Stinson-Dornan-2011
BLM	BRCA2	0.0068733	Co-expression	Stinson-Dornan-2011
BLM	BRCA1	0.00475517	Co-expression	Stinson-Dornan-2011
BLM	PALB2	0.00688442	Co-expression	Stinson-Dornan-2011
BLM	RAD51	0.00883754	Co-expression	Stinson-Dornan-2011
BLM	PARP1	0.00488887	Co-expression	Stinson-Dornan-2011
BLM	BRIP1	0.00613078	Co-expression	Stinson-Dornan-2011
COP1	PARP1	0.0110572	Co-expression	Stinson-Dornan-2011
PSMC3IP	BRCA1	0.0054676	Co-expression	Stinson-Dornan-2011
PARP1	PTGES2	0.0190857	Co-expression	Burczynski-Dorner-2006
PARP1	p53	0.0269789	Co-expression	Burczynski-Dorner-2006
BLM	BRCA1	0.01941	Co-expression	Scherzer-Gullans-2007
BRIP1	BRCA2	0.00687621	Co-expression	Moffatt-Cookson-2007
BRIP1	RAD51	0.00850463	Co-expression	Moffatt-Cookson-2007
BRIP1	DMC1	0.00694949	Co-expression	Moffatt-Cookson-2007
SIN3A	BRIP1	0.00612911	Co-expression	Moffatt-Cookson-2007
COP1	PARP1	0.00963943	Co-expression	Dhodapkar-Barlogie-2014
BARD1	PALB2	0.0144995	Co-expression	Landi-Jen-2008
SEM1	PARP1	0.00202055	Co-expression	Landi-Jen-2008
PTGS1	TBXAS1	0.0134178	Co-expression	Landi-Jen-2008
BLM	RAD51	0.0131019	Co-expression	Landi-Jen-2008
PARP1	p53	0.00841757	Co-expression	Bild-Nevins-2006 A
SIN3A	BLM	0.00882338	Co-expression	Bild-Nevins-2006 A
TP53BP2	PARP1	0.00920389	Co-expression	Bild-Nevins-2006 A
PSMC3IP	BRCA1	0.0210875	Co-expression	Bild-Nevins-2006 A
PSMC3IP	BRIP1	0.0211449	Co-expression	Bild-Nevins-2006 A
SIN3A	PARP1	0.00866356	Co-expression	Wong-Shanley-2009 B
COP1	PALB2	0.0110879	Co-expression	den Boon-Ahlquist-2015
PSMC3IP	BRCA1	0.0155996	Co-expression	den Boon-Ahlquist-2015
PSMC3IP	RAD51	0.0166059	Co-expression	den Boon-Ahlquist-2015
PSMC3IP	BLM	0.0131928	Co-expression	den Boon-Ahlquist-2015
PALB2	p53	0.0185277	Co-expression	Chen-Yeatman-2010
PARP1	PALB2	0.00500134	Co-expression	Chen-Yeatman-2010
COP1	PARP1	0.00729411	Co-expression	Chen-Yeatman-2010
BRCA1	BRCA2	0.0227687	Co-expression	Okayama-Yokota-2012
SEM1	PARP1	0.00247462	Co-expression	Okayama-Yokota-2012
DMC1	BRCA1	0.0158173	Co-expression	Okayama-Yokota-2012
BLM	BRCA2	0.00909345	Co-expression	Okayama-Yokota-2012
BLM	RAD51	0.00976378	Co-expression	Okayama-Yokota-2012
BLM	DMC1	0.00600782	Co-expression	Okayama-Yokota-2012
TP53BP2	COP1	0.0132852	Co-expression	Okayama-Yokota-2012
PSMC3IP	BRCA1	0.016299	Co-expression	Okayama-Yokota-2012
BARD1	PALB2	0.00856245	Co-expression	Raman-Crystal-2009
BLM	RAD51	0.0094987	Co-expression	Raman-Crystal-2009
SIN3A	PALB2	0.00808043	Co-expression	Raman-Crystal-2009
TP53BP2	PARP1	0.0120645	Co-expression	Raman-Crystal-2009
RAD51	p53	0.00697067	Co-expression	Tasaki-Takeuchi-2018 C
BARD1	BRCA2	0.0260744	Co-expression	Tasaki-Takeuchi-2018 C
SEM1	p53	0.00129452	Co-expression	Tasaki-Takeuchi-2018 C
SEM1	RAD51	0.00531537	Co-expression	Tasaki-Takeuchi-2018 C
SIN3A	TP53BP1	0.0110806	Co-expression	Tasaki-Takeuchi-2018 C
PSMC3IP	MDM2	0.00905779	Co-expression	Tasaki-Takeuchi-2018 C
BLM	TP53BP1	0.0228653	Co-expression	Woods-Ginsburg-2013
BLM	PARP1	0.00709763	Co-expression	Woods-Ginsburg-2013
COP1	PTGS2	0.00802424	Co-expression	Elashoff-Topol-2011 C
SIN3A	PALB2	0.00690017	Co-expression	Elashoff-Topol-2011 C
PALB2	BRCA1	0.00336973	Co-expression	Watanabe-Muto-2011
BARD1	PALB2	0.00375949	Co-expression	Watanabe-Muto-2011
MYB	PALB2	0.00380175	Co-expression	Watanabe-Muto-2011
TBXAS1	PALB2	0.00358368	Co-expression	Watanabe-Muto-2011
BRIP1	BRCA1	0.032352	Co-expression	Watanabe-Muto-2011
BLM	BRCA1	0.00531639	Co-expression	Watanabe-Muto-2011
BLM	PALB2	0.000609352	Co-expression	Watanabe-Muto-2011
BLM	BARD1	0.00594574	Co-expression	Watanabe-Muto-2011
BLM	MYB	0.00600666	Co-expression	Watanabe-Muto-2011
BLM	DMC1	0.00616524	Co-expression	Watanabe-Muto-2011
PSMC3IP	BRCA1	0.0228439	Co-expression	Watanabe-Muto-2011
DMC1	BRCA1	0.0130299	Co-expression	Tarca-Zechner-2013
BRIP1	BRCA2	0.00900572	Co-expression	Tarca-Zechner-2013
BRIP1	BRCA1	0.00686482	Co-expression	Tarca-Zechner-2013
BLM	BRCA2	0.00721416	Co-expression	Tarca-Zechner-2013
BLM	BRCA1	0.00525871	Co-expression	Tarca-Zechner-2013
BLM	RAD51	0.00566592	Co-expression	Tarca-Zechner-2013
BLM	DMC1	0.00763527	Co-expression	Tarca-Zechner-2013
TP53BP2	PARP1	0.00581871	Co-expression	Tarca-Zechner-2013
PSMC3IP	BRCA1	0.00489729	Co-expression	Tarca-Zechner-2013
PSMC3IP	BARD1	0.006691	Co-expression	Tarca-Zechner-2013
PSMC3IP	DMC1	0.00633004	Co-expression	Tarca-Zechner-2013
PSMC3IP	BRIP1	0.00352011	Co-expression	Tarca-Zechner-2013
PSMC3IP	BLM	0.00268148	Co-expression	Tarca-Zechner-2013
SEM1	BARD1	0.00837653	Co-expression	Potti-Nevins-2006
BRIP1	BRCA2	0.00728498	Co-expression	Potti-Nevins-2006
BRIP1	BRCA1	0.00611804	Co-expression	Potti-Nevins-2006
BRIP1	RAD51	0.00609439	Co-expression	Potti-Nevins-2006
BRIP1	BARD1	0.00453376	Co-expression	Potti-Nevins-2006
BRCA1	BRCA2	0.024571	Co-expression	Gadd-Perlman-2012
BRIP1	BRCA2	0.013736	Co-expression	Gadd-Perlman-2012
BRIP1	BRCA1	0.0124755	Co-expression	Gadd-Perlman-2012
BLM	BRCA2	0.00805381	Co-expression	Gadd-Perlman-2012
BLM	BRCA1	0.00847345	Co-expression	Gadd-Perlman-2012
BLM	RAD51	0.0117349	Co-expression	Gadd-Perlman-2012
BLM	MYB	0.00949308	Co-expression	Gadd-Perlman-2012
TP53BP2	PARP1	0.00951019	Co-expression	Gadd-Perlman-2012
PSMC3IP	BRCA1	0.0268654	Co-expression	Gadd-Perlman-2012
PSMC3IP	BLM	0.00898583	Co-expression	Gadd-Perlman-2012
DMC1	BRCA2	0.0223864	Co-expression	Raponi-Beer-2006
PTGS1	PTGIS	0.00667575	Co-expression	Raponi-Beer-2006
BLM	BRCA2	0.0100871	Co-expression	Raponi-Beer-2006
BLM	BRCA1	0.00685889	Co-expression	Raponi-Beer-2006
BLM	BRIP1	0.00436868	Co-expression	Raponi-Beer-2006
TP53BP2	PARP1	0.00777779	Co-expression	Raponi-Beer-2006
PSMC3IP	BRCA1	0.0161092	Co-expression	Raponi-Beer-2006
PSMC3IP	BARD1	0.0123054	Co-expression	Raponi-Beer-2006
BARD1	BRCA1	0.00893209	Co-expression	Wardell-McDonnell-2012
PARP1	BRCA1	0.0034399	Co-expression	Wardell-McDonnell-2012
DMC1	RAD51	0.0321057	Co-expression	Wardell-McDonnell-2012
BRIP1	BRCA2	0.0050884	Co-expression	Wardell-McDonnell-2012
BRIP1	BRCA1	0.0041456	Co-expression	Wardell-McDonnell-2012
BLM	BRIP1	0.00768538	Co-expression	Wardell-McDonnell-2012
PSMC3IP	BRCA2	0.0153507	Co-expression	Wardell-McDonnell-2012
PSMC3IP	BRIP1	0.01124	Co-expression	Wardell-McDonnell-2012
RAD51	BRCA2	0.00452402	Co-expression	Meyer-Debatin-2011
MYB	BARD1	0.0147551	Co-expression	Meyer-Debatin-2011
PARP1	p53	0.00411735	Co-expression	Meyer-Debatin-2011
DMC1	BRCA2	0.000914553	Co-expression	Meyer-Debatin-2011
BRIP1	BRCA2	0.00242523	Co-expression	Meyer-Debatin-2011
BRIP1	BRCA1	0.00925359	Co-expression	Meyer-Debatin-2011
BRIP1	DMC1	0.00167672	Co-expression	Meyer-Debatin-2011
BLM	RAD51	0.0156892	Co-expression	Meyer-Debatin-2011
COP1	PARP1	0.00573897	Co-expression	Meyer-Debatin-2011
TP53BP2	SIN3A	0.00690232	Co-expression	Meyer-Debatin-2011
PSMC3IP	BRIP1	0.00924828	Co-expression	Meyer-Debatin-2011
BLM	BRCA2	0.0119759	Co-expression	Clarke-Clynes-2013
BLM	BRIP1	0.0132184	Co-expression	Clarke-Clynes-2013
COP1	PARP1	0.00924343	Co-expression	Clarke-Clynes-2013
COP1	SEM1	0.0118232	Co-expression	Clarke-Clynes-2013
TP53BP2	COP1	0.0109426	Co-expression	Clarke-Clynes-2013
BLM	TP53BP1	0.0056492	Co-expression	Taylor-Kwo-2008
PARP1	BRCA1	0.0258548	Co-expression	Meier-Seiler-2009
BRIP1	BRCA1	0.00733427	Co-expression	Elashoff-Topol-2011 A
COP1	PTGS2	0.0154031	Co-expression	Elashoff-Topol-2011 A
TP53BP2	SIN3A	0.0105015	Co-expression	Elashoff-Topol-2011 A
BARD1	BRCA2	0.00733437	Co-localization	Schadt-Shoemaker-2004
PTGS1	PTGIS	0.0119294	Co-localization	Schadt-Shoemaker-2004
BLM	BRCA2	0.00703027	Co-localization	Schadt-Shoemaker-2004
BLM	BARD1	0.00694353	Co-localization	Schadt-Shoemaker-2004
BRCA1	BRCA2	0.0203336	Co-localization	Johnson-Shoemaker-2003
BARD1	BRCA2	0.00711902	Co-localization	Johnson-Shoemaker-2003
BARD1	RAD51	0.0112962	Co-localization	Johnson-Shoemaker-2003
PTGS1	PTGIS	0.0201318	Co-localization	Johnson-Shoemaker-2003
BRIP1	BRCA2	0.00786	Co-localization	Johnson-Shoemaker-2003
BRIP1	BRCA1	0.0113476	Co-localization	Johnson-Shoemaker-2003
BRIP1	RAD51	0.0117291	Co-localization	Johnson-Shoemaker-2003
BRIP1	BARD1	0.00424882	Co-localization	Johnson-Shoemaker-2003
BRIP1	MYB	0.0075051	Co-localization	Johnson-Shoemaker-2003
BLM	BRCA2	0.0170967	Co-localization	Johnson-Shoemaker-2003
BLM	BRCA1	0.0277078	Co-localization	Johnson-Shoemaker-2003
BLM	BRIP1	0.0102322	Co-localization	Johnson-Shoemaker-2003
TP53BP2	PTGS2	0.0207892	Co-localization	Johnson-Shoemaker-2003
PSMC3IP	BRIP1	0.00881912	Co-localization	Johnson-Shoemaker-2003
MDM2	p53	0.0678139	Co-localization	Chen-Huang-2014
PARP1	BRCA1	0.171015	Genetic Interactions	Shen-Mali-2017
BLM	RAD51	0.174233	Genetic Interactions	Vizeacoumar-Moffat-2013
PARP1	BRCA2	0.395233	Genetic Interactions	Srivas-Ideker-2016
PARP1	BRCA1	0.816497	Genetic Interactions	Srivas-Ideker-2016
RAD51	BRCA1	0.197096	Genetic Interactions	BIOGRID-SMALL-SCALE-STUDIES
MDM2	p53	0.0666529	Genetic Interactions	BIOGRID-SMALL-SCALE-STUDIES
PARP1	BRCA2	0.29216	Genetic Interactions	BIOGRID-SMALL-SCALE-STUDIES
BRCA1	p53	0.00345788	Pathway	Wu-Stein-2010
RAD51	BRCA2	0.219693	Pathway	Wu-Stein-2010
RAD51	BRCA1	0.0510453	Pathway	Wu-Stein-2010
BARD1	p53	0.00443747	Pathway	Wu-Stein-2010
BARD1	BRCA1	0.017704	Pathway	Wu-Stein-2010
BARD1	RAD51	0.065506	Pathway	Wu-Stein-2010
MDM2	p53	0.00476236	Pathway	Wu-Stein-2010
TP53BP1	BRCA1	0.0881343	Pathway	Wu-Stein-2010
TBXAS1	p53	0.0625288	Pathway	Wu-Stein-2010
PTGS1	p53	0.0283412	Pathway	Wu-Stein-2010
COP1	p53	0.029595	Pathway	Wu-Stein-2010
BRCA1	p53	0.00420445	Pathway	NCI_NATURE
PALB2	BRCA2	0.327519	Pathway	NCI_NATURE
RAD51	BRCA2	0.260383	Pathway	NCI_NATURE
RAD51	BRCA1	0.0797932	Pathway	NCI_NATURE
BARD1	p53	0.0054183	Pathway	NCI_NATURE
BARD1	BRCA1	0.0185923	Pathway	NCI_NATURE
BARD1	RAD51	0.10283	Pathway	NCI_NATURE
MDM2	p53	0.00490435	Pathway	NCI_NATURE
MYB	PTGS2	0.084726	Pathway	NCI_NATURE
TP53BP1	BRCA1	0.0291099	Pathway	NCI_NATURE
IRF9	PTGES2	0.775991	Pathway	NCI_NATURE
BLM	BRIP1	0.218241	Pathway	NCI_NATURE
SIN3A	MYB	0.0132923	Pathway	NCI_NATURE
BRCA1	BRCA2	0.0445647	Pathway	REACTOME
PALB2	BRCA1	0.432	Pathway	REACTOME
MYB	p53	0.57735	Pathway	REACTOME
DMC1	BRCA2	0.0600872	Pathway	REACTOME
DMC1	BRCA1	0.052468	Pathway	REACTOME
DMC1	RAD51	0.0759554	Pathway	REACTOME
BLM	BRCA2	0.0848053	Pathway	REACTOME
COP1	p53	0.57735	Pathway	REACTOME
SIN3A	p53	0.57735	Pathway	REACTOME
PSMC3IP	BRCA2	0.0786122	Pathway	REACTOME
PSMC3IP	BRCA1	0.068644	Pathway	REACTOME
PSMC3IP	RAD51	0.0993727	Pathway	REACTOME
PSMC3IP	DMC1	0.0925536	Pathway	REACTOME
TP53BP1	MDM2	0.64671	Pathway	IMID
MDM2	p53	0.129887	Physical Interactions	Li-Fu-2017
BARD1	BRCA1	0.0453609	Physical Interactions	Ertych-Bastians-2016
TP53BP1	BRCA1	0.0453609	Physical Interactions	Ertych-Bastians-2016
PARP1	BRCA1	0.0453609	Physical Interactions	Ertych-Bastians-2016
BRIP1	BRCA1	0.0453609	Physical Interactions	Ertych-Bastians-2016
BLM	BRCA1	0.0453609	Physical Interactions	Ertych-Bastians-2016
BRCA1	BRCA2	0.0306212	Physical Interactions	IREF-reactome
PALB2	BRCA2	0.304524	Physical Interactions	IREF-reactome
PALB2	BRCA1	0.185299	Physical Interactions	IREF-reactome
RAD51	BRCA2	0.0659263	Physical Interactions	IREF-reactome
RAD51	BRCA1	0.0401152	Physical Interactions	IREF-reactome
MDM2	p53	0.0282416	Physical Interactions	IREF-reactome
MYB	p53	0.219941	Physical Interactions	IREF-reactome
TP53BP1	BRCA1	0.100593	Physical Interactions	IREF-reactome
TBXAS1	PTGS2	0.31034	Physical Interactions	IREF-reactome
PTGIS	PTGS2	0.31034	Physical Interactions	IREF-reactome
DMC1	BRCA2	0.0736349	Physical Interactions	IREF-reactome
DMC1	BRCA1	0.0448057	Physical Interactions	IREF-reactome
DMC1	RAD51	0.0964649	Physical Interactions	IREF-reactome
PTGDS	PTGS2	0.31034	Physical Interactions	IREF-reactome
PTGS1	TBXAS1	0.422478	Physical Interactions	IREF-reactome
PTGS1	PTGIS	0.422478	Physical Interactions	IREF-reactome
PTGS1	PTGDS	0.422478	Physical Interactions	IREF-reactome
BLM	BRCA2	0.09484	Physical Interactions	IREF-reactome
COP1	p53	0.0250938	Physical Interactions	IREF-reactome
SIN3A	p53	0.0159838	Physical Interactions	IREF-reactome
SIN3A	MYB	0.171739	Physical Interactions	IREF-reactome
PSMC3IP	BRCA2	0.0797763	Physical Interactions	IREF-reactome
PSMC3IP	BRCA1	0.0485427	Physical Interactions	IREF-reactome
PSMC3IP	RAD51	0.10451	Physical Interactions	IREF-reactome
PSMC3IP	DMC1	0.116731	Physical Interactions	IREF-reactome
BRCA1	BRCA2	0.0306212	Physical Interactions	Vastrik-Stein-2007
PALB2	BRCA2	0.304524	Physical Interactions	Vastrik-Stein-2007
PALB2	BRCA1	0.185299	Physical Interactions	Vastrik-Stein-2007
RAD51	BRCA2	0.0659263	Physical Interactions	Vastrik-Stein-2007
RAD51	BRCA1	0.0401152	Physical Interactions	Vastrik-Stein-2007
MDM2	p53	0.0282416	Physical Interactions	Vastrik-Stein-2007
MYB	p53	0.219941	Physical Interactions	Vastrik-Stein-2007
TP53BP1	BRCA1	0.100593	Physical Interactions	Vastrik-Stein-2007
TBXAS1	PTGS2	0.31034	Physical Interactions	Vastrik-Stein-2007
PTGIS	PTGS2	0.31034	Physical Interactions	Vastrik-Stein-2007
DMC1	BRCA2	0.0736349	Physical Interactions	Vastrik-Stein-2007
DMC1	BRCA1	0.0448057	Physical Interactions	Vastrik-Stein-2007
DMC1	RAD51	0.0964649	Physical Interactions	Vastrik-Stein-2007
PTGDS	PTGS2	0.31034	Physical Interactions	Vastrik-Stein-2007
PTGS1	TBXAS1	0.422478	Physical Interactions	Vastrik-Stein-2007
PTGS1	PTGIS	0.422478	Physical Interactions	Vastrik-Stein-2007
PTGS1	PTGDS	0.422478	Physical Interactions	Vastrik-Stein-2007
BLM	BRCA2	0.09484	Physical Interactions	Vastrik-Stein-2007
COP1	p53	0.0250938	Physical Interactions	Vastrik-Stein-2007
SIN3A	p53	0.0159838	Physical Interactions	Vastrik-Stein-2007
SIN3A	MYB	0.171739	Physical Interactions	Vastrik-Stein-2007
PSMC3IP	BRCA2	0.0797763	Physical Interactions	Vastrik-Stein-2007
PSMC3IP	BRCA1	0.0485427	Physical Interactions	Vastrik-Stein-2007
PSMC3IP	RAD51	0.10451	Physical Interactions	Vastrik-Stein-2007
PSMC3IP	DMC1	0.116731	Physical Interactions	Vastrik-Stein-2007
MDM2	p53	0.0922897	Physical Interactions	Fogeron-Lange-2013
TP53BP1	p53	0.707107	Physical Interactions	IREF-hpidb
TP53BP2	p53	0.707107	Physical Interactions	IREF-hpidb
BARD1	BRCA1	0.401287	Physical Interactions	Hein-Mann-2015
BRCA1	BRCA2	0.0330832	Physical Interactions	IREF-quickgo
PALB2	BRCA2	0.0938574	Physical Interactions	IREF-quickgo
PALB2	BRCA1	0.0780565	Physical Interactions	IREF-quickgo
RAD51	BRCA2	0.0246593	Physical Interactions	IREF-quickgo
RAD51	p53	0.00652729	Physical Interactions	IREF-quickgo
RAD51	BRCA1	0.0205079	Physical Interactions	IREF-quickgo
RAD51	PALB2	0.058181	Physical Interactions	IREF-quickgo
BARD1	BRCA1	0.0752269	Physical Interactions	IREF-quickgo
MDM2	p53	0.00708996	Physical Interactions	IREF-quickgo
TP53BP1	p53	0.017696	Physical Interactions	IREF-quickgo
SEM1	BRCA2	0.147012	Physical Interactions	IREF-quickgo
DMC1	BRCA2	0.36323	Physical Interactions	IREF-quickgo
BRIP1	BRCA1	0.178973	Physical Interactions	IREF-quickgo
BLM	p53	0.0130702	Physical Interactions	IREF-quickgo
BLM	RAD51	0.0306086	Physical Interactions	IREF-quickgo
TP53BP2	p53	0.0179115	Physical Interactions	IREF-quickgo
p53	BRCA2	0.0225748	Physical Interactions	IREF-dip
BRCA1	BRCA2	0.0420709	Physical Interactions	IREF-dip
BRCA1	p53	0.00769885	Physical Interactions	IREF-dip
PALB2	BRCA2	0.091526	Physical Interactions	IREF-dip
PALB2	BRCA1	0.0312137	Physical Interactions	IREF-dip
RAD51	BRCA2	0.0693139	Physical Interactions	IREF-dip
RAD51	PALB2	0.0514261	Physical Interactions	IREF-dip
BARD1	BRCA1	0.277966	Physical Interactions	IREF-dip
MDM2	p53	0.0127399	Physical Interactions	IREF-dip
TP53BP1	p53	0.0338051	Physical Interactions	IREF-dip
PARP1	p53	0.0125104	Physical Interactions	IREF-dip
SEM1	BRCA2	0.200723	Physical Interactions	IREF-dip
DMC1	BRCA2	0.240398	Physical Interactions	IREF-dip
BRIP1	BRCA1	0.144304	Physical Interactions	IREF-dip
BRIP1	PALB2	0.313935	Physical Interactions	IREF-dip
BLM	RAD51	0.0687635	Physical Interactions	IREF-dip
TP53BP2	p53	0.0198213	Physical Interactions	IREF-dip
BARD1	BRCA1	1	Physical Interactions	IREF-intcomplex
PALB2	BRCA2	0.216874	Physical Interactions	IREF-uniprotpp
RAD51	PALB2	0.164436	Physical Interactions	IREF-uniprotpp
BARD1	p53	0.0785063	Physical Interactions	IREF-uniprotpp
BARD1	BRCA1	0.0905267	Physical Interactions	IREF-uniprotpp
SEM1	BRCA2	0.68131	Physical Interactions	IREF-uniprotpp
p53	PTGS2	0.00244626	Physical Interactions	BIOGRID-SMALL-SCALE-STUDIES
p53	BRCA2	0.000567779	Physical Interactions	BIOGRID-SMALL-SCALE-STUDIES
BRCA1	BRCA2	0.000855205	Physical Interactions	BIOGRID-SMALL-SCALE-STUDIES
BRCA1	p53	0.00029484	Physical Interactions	BIOGRID-SMALL-SCALE-STUDIES
PALB2	BRCA2	0.00827054	Physical Interactions	BIOGRID-SMALL-SCALE-STUDIES
PALB2	BRCA1	0.00429478	Physical Interactions	BIOGRID-SMALL-SCALE-STUDIES
RAD51	BRCA2	0.00246121	Physical Interactions	BIOGRID-SMALL-SCALE-STUDIES
RAD51	p53	0.000848524	Physical Interactions	BIOGRID-SMALL-SCALE-STUDIES
RAD51	BRCA1	0.00127807	Physical Interactions	BIOGRID-SMALL-SCALE-STUDIES
RAD51	PALB2	0.01236	Physical Interactions	BIOGRID-SMALL-SCALE-STUDIES
BARD1	BRCA2	0.00310653	Physical Interactions	BIOGRID-SMALL-SCALE-STUDIES
BARD1	p53	0.00107101	Physical Interactions	BIOGRID-SMALL-SCALE-STUDIES
BARD1	BRCA1	0.00161318	Physical Interactions	BIOGRID-SMALL-SCALE-STUDIES
BARD1	RAD51	0.00464259	Physical Interactions	BIOGRID-SMALL-SCALE-STUDIES
MDM2	p53	0.00029009	Physical Interactions	BIOGRID-SMALL-SCALE-STUDIES
TP53BP1	BRCA2	0.00395547	Physical Interactions	BIOGRID-SMALL-SCALE-STUDIES
TP53BP1	p53	0.00136369	Physical Interactions	BIOGRID-SMALL-SCALE-STUDIES
TP53BP1	BRCA1	0.00205402	Physical Interactions	BIOGRID-SMALL-SCALE-STUDIES
TP53BP1	RAD51	0.00591131	Physical Interactions	BIOGRID-SMALL-SCALE-STUDIES
PARP1	p53	0.000544092	Physical Interactions	BIOGRID-SMALL-SCALE-STUDIES
PARP1	BRCA1	0.000819527	Physical Interactions	BIOGRID-SMALL-SCALE-STUDIES
PARP1	BARD1	0.00297693	Physical Interactions	BIOGRID-SMALL-SCALE-STUDIES
PARP1	MYB	0.00614431	Physical Interactions	BIOGRID-SMALL-SCALE-STUDIES
SEM1	BRCA2	0.00205633	Physical Interactions	BIOGRID-SMALL-SCALE-STUDIES
SEM1	BRCA1	0.00106782	Physical Interactions	BIOGRID-SMALL-SCALE-STUDIES
SEM1	RAD51	0.00307311	Physical Interactions	BIOGRID-SMALL-SCALE-STUDIES
PTGIS	PTGS2	0.15735	Physical Interactions	BIOGRID-SMALL-SCALE-STUDIES
DMC1	BRCA2	0.0153916	Physical Interactions	BIOGRID-SMALL-SCALE-STUDIES
DMC1	RAD51	0.0230022	Physical Interactions	BIOGRID-SMALL-SCALE-STUDIES
PTGS1	PTGS2	0.107124	Physical Interactions	BIOGRID-SMALL-SCALE-STUDIES
PTGS1	PTGIS	0.551367	Physical Interactions	BIOGRID-SMALL-SCALE-STUDIES
BRIP1	BRCA2	0.00834223	Physical Interactions	BIOGRID-SMALL-SCALE-STUDIES
BRIP1	BRCA1	0.00433201	Physical Interactions	BIOGRID-SMALL-SCALE-STUDIES
BRIP1	PALB2	0.0418941	Physical Interactions	BIOGRID-SMALL-SCALE-STUDIES
BRIP1	BARD1	0.015736	Physical Interactions	BIOGRID-SMALL-SCALE-STUDIES
BLM	p53	0.00133251	Physical Interactions	BIOGRID-SMALL-SCALE-STUDIES
BLM	BRCA1	0.00200707	Physical Interactions	BIOGRID-SMALL-SCALE-STUDIES
BLM	RAD51	0.00577618	Physical Interactions	BIOGRID-SMALL-SCALE-STUDIES
BLM	TP53BP1	0.00928305	Physical Interactions	BIOGRID-SMALL-SCALE-STUDIES
BLM	PARP1	0.00370381	Physical Interactions	BIOGRID-SMALL-SCALE-STUDIES
BLM	BRIP1	0.0195783	Physical Interactions	BIOGRID-SMALL-SCALE-STUDIES
COP1	p53	0.00151597	Physical Interactions	BIOGRID-SMALL-SCALE-STUDIES
COP1	MDM2	0.00224661	Physical Interactions	BIOGRID-SMALL-SCALE-STUDIES
SIN3A	p53	0.000693209	Physical Interactions	BIOGRID-SMALL-SCALE-STUDIES
SIN3A	MYB	0.00782826	Physical Interactions	BIOGRID-SMALL-SCALE-STUDIES
SIN3A	SEM1	0.0025106	Physical Interactions	BIOGRID-SMALL-SCALE-STUDIES
TP53BP2	p53	0.00434631	Physical Interactions	BIOGRID-SMALL-SCALE-STUDIES
PSMC3IP	RAD51	0.0431437	Physical Interactions	BIOGRID-SMALL-SCALE-STUDIES
RAD51	BRCA2	0.315907	Physical Interactions	IREF-mppi
SEM1	BRCA2	0.816497	Physical Interactions	IREF-mppi
BARD1	BRCA1	0.84376	Physical Interactions	Huttlin-Harper-2017
MDM2	p53	0.0459823	Physical Interactions	Huttlin-Harper-2017
DMC1	RAD51	0.207124	Physical Interactions	Huttlin-Harper-2017
MDM2	p53	1	Physical Interactions	Trepte-Wanker-2018 A
BRCA1	p53	0.01134	Physical Interactions	IREF-mint
PALB2	BRCA2	0.0534972	Physical Interactions	IREF-mint
PALB2	BRCA1	0.0414434	Physical Interactions	IREF-mint
RAD51	BRCA2	0.042809	Physical Interactions	IREF-mint
BARD1	BRCA1	0.211869	Physical Interactions	IREF-mint
MDM2	p53	0.0043441	Physical Interactions	IREF-mint
PARP1	p53	0.00644226	Physical Interactions	IREF-mint
SEM1	BRCA2	0.269516	Physical Interactions	IREF-mint
DMC1	BRCA2	0.483571	Physical Interactions	IREF-mint
BRIP1	BRCA1	0.16796	Physical Interactions	IREF-mint
BLM	BRIP1	0.377504	Physical Interactions	IREF-mint
COP1	p53	0.0259939	Physical Interactions	IREF-mint
SIN3A	p53	0.0496255	Physical Interactions	IREF-mint
RAD51	BRCA1	0.204075	Physical Interactions	IREF-corum
BARD1	BRCA1	0.411198	Physical Interactions	IREF-corum
MDM2	p53	0.310172	Physical Interactions	IREF-corum
BRIP1	BRCA1	0.411198	Physical Interactions	IREF-corum
MDM2	p53	0.271312	Physical Interactions	Li-Chen-2015
p53	PTGS2	0.174421	Physical Interactions	IREF-bind-translation
BRCA1	p53	0.00552596	Physical Interactions	IREF-bind-translation
RAD51	BRCA1	0.035086	Physical Interactions	IREF-bind-translation
BARD1	p53	0.0108443	Physical Interactions	IREF-bind-translation
MDM2	p53	0.0122453	Physical Interactions	IREF-bind-translation
TP53BP1	p53	0.0320986	Physical Interactions	IREF-bind-translation
BRIP1	BRCA1	0.23644	Physical Interactions	IREF-bind-translation
BLM	p53	0.0245656	Physical Interactions	IREF-bind-translation
BLM	RAD51	0.155975	Physical Interactions	IREF-bind-translation
COP1	p53	0.0464583	Physical Interactions	IREF-bind-translation
SIN3A	p53	0.0332435	Physical Interactions	IREF-bind-translation
TP53BP2	p53	0.0492076	Physical Interactions	IREF-bind-translation
BRCA1	p53	0.00663122	Physical Interactions	IREF-bind
RAD51	BRCA1	0.0564059	Physical Interactions	IREF-bind
BARD1	p53	0.0118524	Physical Interactions	IREF-bind
TP53BP1	p53	0.0868939	Physical Interactions	IREF-bind
BRIP1	BRCA1	0.234951	Physical Interactions	IREF-bind
BLM	p53	0.0261798	Physical Interactions	IREF-bind
BLM	RAD51	0.222689	Physical Interactions	IREF-bind
COP1	p53	0.0531132	Physical Interactions	IREF-bind
SIN3A	p53	0.0364439	Physical Interactions	IREF-bind
TP53BP2	p53	0.0554609	Physical Interactions	IREF-bind
MDM2	p53	0.104333	Physical Interactions	Huttlin-Gygi-2015
DMC1	RAD51	0.337012	Physical Interactions	Huttlin-Gygi-2015
COP1	DMC1	0.131017	Physical Interactions	Huttlin-Gygi-2015
MDM2	p53	1	Physical Interactions	Trepte-Wanker-2018 B
p53	PTGS2	0.0986024	Physical Interactions	Lim-Zoghbi-2006
p53	BRCA2	0.0528579	Physical Interactions	Lim-Zoghbi-2006
BRCA1	BRCA2	0.0956541	Physical Interactions	Lim-Zoghbi-2006
BRCA1	p53	0.00139094	Physical Interactions	Lim-Zoghbi-2006
RAD51	BRCA1	0.0389858	Physical Interactions	Lim-Zoghbi-2006
BARD1	BRCA1	0.00834	Physical Interactions	Lim-Zoghbi-2006
MDM2	p53	0.0141739	Physical Interactions	Lim-Zoghbi-2006
TP53BP1	p53	0.0986024	Physical Interactions	Lim-Zoghbi-2006
PARP1	p53	0.0127367	Physical Interactions	Lim-Zoghbi-2006
BRIP1	BRCA1	0.147644	Physical Interactions	Lim-Zoghbi-2006
BLM	p53	0.0986024	Physical Interactions	Lim-Zoghbi-2006
SIN3A	p53	0.0144894	Physical Interactions	Lim-Zoghbi-2006
p53	PTGS2	0.00896444	Physical Interactions	IREF-spike
p53	BRCA2	0.00554225	Physical Interactions	IREF-spike
BRCA1	BRCA2	0.0142073	Physical Interactions	IREF-spike
BRCA1	p53	0.00141474	Physical Interactions	IREF-spike
PALB2	BRCA2	0.447968	Physical Interactions	IREF-spike
RAD51	p53	0.00426408	Physical Interactions	IREF-spike
RAD51	BRCA1	0.0109308	Physical Interactions	IREF-spike
BARD1	BRCA1	0.0121104	Physical Interactions	IREF-spike
MDM2	p53	0.00217424	Physical Interactions	IREF-spike
TP53BP1	p53	0.0071092	Physical Interactions	IREF-spike
PARP1	p53	0.00488179	Physical Interactions	IREF-spike
SEM1	BRCA2	0.447968	Physical Interactions	IREF-spike
DMC1	BRCA2	0.148631	Physical Interactions	IREF-spike
BRIP1	BRCA1	0.0358074	Physical Interactions	IREF-spike
BLM	p53	0.0124189	Physical Interactions	IREF-spike
BLM	RAD51	0.0959529	Physical Interactions	IREF-spike
COP1	p53	0.0195796	Physical Interactions	IREF-spike
SIN3A	p53	0.00680137	Physical Interactions	IREF-spike
TP53BP2	p53	0.00384229	Physical Interactions	IREF-spike
MDM2	p53	0.0458357	Physical Interactions	Wang-Yang-2011
DMC1	RAD51	0.0234431	Predicted	I2D-BioGRID-Yeast2Human
p53	BRCA2	0.00781978	Predicted	Wu-Stein-2010
BRCA1	BRCA2	0.0132757	Predicted	Wu-Stein-2010
RAD51	p53	0.00546973	Predicted	Wu-Stein-2010
BARD1	BRCA2	0.0420789	Predicted	Wu-Stein-2010
TP53BP1	p53	0.0109349	Predicted	Wu-Stein-2010
PARP1	p53	0.00624699	Predicted	Wu-Stein-2010
PARP1	BRCA1	0.0106056	Predicted	Wu-Stein-2010
PARP1	BARD1	0.0336156	Predicted	Wu-Stein-2010
SEM1	BRCA2	0.38886	Predicted	Wu-Stein-2010
DMC1	RAD51	0.0322232	Predicted	Wu-Stein-2010
PTGS1	PTGS2	1	Predicted	Wu-Stein-2010
BRIP1	BRCA1	0.212501	Predicted	Wu-Stein-2010
BLM	p53	0.00490735	Predicted	Wu-Stein-2010
BLM	BRCA1	0.00833127	Predicted	Wu-Stein-2010
BLM	RAD51	0.0152277	Predicted	Wu-Stein-2010
BLM	TP53BP1	0.0304427	Predicted	Wu-Stein-2010
SIN3A	p53	0.00443465	Predicted	Wu-Stein-2010
TP53BP2	p53	0.013528	Predicted	Wu-Stein-2010
BARD1	p53	0.305095	Predicted	I2D-IntAct-Mouse2Human
MDM2	p53	0.0340133	Predicted	I2D-IntAct-Mouse2Human
MDM2	p53	0.145284	Predicted	I2D-INNATEDB-Mouse2Human
MDM2	PTGS2	0.175217	Predicted	I2D-BioGRID-Rat2Human
MDM2	p53	0.0581037	Predicted	I2D-BioGRID-Rat2Human
BRCA1	BRCA2	0.0765184	Predicted	I2D-BioGRID-Mouse2Human
RAD51	BRCA2	0.246104	Predicted	I2D-BioGRID-Mouse2Human
RAD51	BRCA1	0.0907029	Predicted	I2D-BioGRID-Mouse2Human
BARD1	p53	0.0979961	Predicted	I2D-BioGRID-Mouse2Human
MDM2	p53	0.00885752	Predicted	I2D-BioGRID-Mouse2Human
TP53BP1	p53	0.020271	Predicted	I2D-BioGRID-Mouse2Human
PARP1	BRCA1	0.0466742	Predicted	I2D-BioGRID-Mouse2Human
SIN3A	p53	0.00817631	Predicted	I2D-BioGRID-Mouse2Human
RAD51	BRCA2	0.57735	Predicted	I2D-BIND-Mouse2Human
MDM2	p53	0.101539	Predicted	I2D-BIND-Mouse2Human
BLM	RAD51	0.57735	Predicted	I2D-BIND-Mouse2Human
SIN3A	p53	0.344914	Predicted	I2D-BIND-Mouse2Human
RAD51	BRCA2	1	Predicted	I2D-MGI-Mouse2Human
BARD1	BRCA1	0.0201438	Shared protein domains	INTERPRO
TP53BP1	BRCA1	0.0270601	Shared protein domains	INTERPRO
TP53BP1	BARD1	0.0298769	Shared protein domains	INTERPRO
PARP1	BRCA1	0.0158794	Shared protein domains	INTERPRO
PARP1	BARD1	0.0175323	Shared protein domains	INTERPRO
PARP1	TP53BP1	0.0339366	Shared protein domains	INTERPRO
PTGIS	TBXAS1	0.0127962	Shared protein domains	INTERPRO
DMC1	RAD51	0.101565	Shared protein domains	INTERPRO
PTGS1	PTGS2	0.0896316	Shared protein domains	INTERPRO
BARD1	BRCA1	0.0175971	Shared protein domains	PFAM
PARP1	BRCA1	0.0146983	Shared protein domains	PFAM
PARP1	BARD1	0.021975	Shared protein domains	PFAM
PTGIS	TBXAS1	0.0164313	Shared protein domains	PFAM
DMC1	RAD51	0.142857	Shared protein domains	PFAM
PTGS1	PTGS2	0.0447574	Shared protein domains	PFAM

## Sheet: grp 2-4
Gene 1	Gene 2	Weight	Network group	Network
STAT3	JAK1	0.00473227	Co-expression	Bonome-Birrer-2008
PIK3CA	STAT3	0.00908674	Co-expression	Bonome-Birrer-2008
MAPK1	BAX	0.0191729	Co-expression	Bonome-Birrer-2008
MAPK1	PIK3CA	0.0123421	Co-expression	Bonome-Birrer-2008
MYC	JAK1	0.00595456	Co-expression	Bonome-Birrer-2008
MYC	PIK3CA	0.0122366	Co-expression	Bonome-Birrer-2008
MYC	MAPK1	0.0188319	Co-expression	Bonome-Birrer-2008
CDK4	PARP2	0.00994648	Co-expression	Bonome-Birrer-2008
CDK4	PARP1	0.00892842	Co-expression	Bonome-Birrer-2008
FH	PARP1	0.0174093	Co-expression	Bonome-Birrer-2008
ARAF	p53	0.0203514	Co-expression	Bonome-Birrer-2008
CDH1	PIK3CA	0.0143346	Co-expression	Bonome-Birrer-2008
MAP2K1	PIK3CA	0.00838495	Co-expression	Bonome-Birrer-2008
BRAF	STAT	0.0168092	Co-expression	Peri-Russo-2012
MAPK1	STAT	0.0179077	Co-expression	Peri-Russo-2012
EGFR	JAK1	0.0293349	Co-expression	Peri-Russo-2012
PIK3R1	KRAS	0.0144768	Co-expression	Peri-Russo-2012
CDH1	MUC1	0.00360628	Co-expression	Peri-Russo-2012
RAF1	NFKBIZ	0.00553736	Co-expression	Peri-Russo-2012
PIK3R3	MAP2K1	0.00718544	Co-expression	Peri-Russo-2012
FGFR2	CDH1	0.0047117	Co-expression	Peri-Russo-2012
STAT3	MUC1	0.0168019	Co-expression	Yu-Tan-2008
STAT3	JAK1	0.0188565	Co-expression	Yu-Tan-2008
p53	BAX	0.0281089	Co-expression	Yu-Tan-2008
PIK3R3	PIK3R1	0.0174767	Co-expression	Yu-Tan-2008
RRM2	RAD51	0.00891139	Co-expression	Yu-Tan-2008
WNT1	WNT6	0.00596738	Co-expression	Wang-Maris-2006
WNT1	MUC1	0.0118765	Co-expression	Wang-Maris-2006
STAT3	JAK1	0.0166239	Co-expression	Wang-Maris-2006
MAPK1	WNT1	0.00453937	Co-expression	Wang-Maris-2006
BRCA1	BRCA2	0.0157567	Co-expression	Wang-Maris-2006
CDK4	PARP1	0.00568645	Co-expression	Wang-Maris-2006
RAD51	p53	0.0230124	Co-expression	Wang-Maris-2006
CDH1	MAPK1	0.00957591	Co-expression	Wang-Maris-2006
MAP2K1	MAPK1	0.00843728	Co-expression	Wang-Maris-2006
RRM2	PARP1	0.00767637	Co-expression	Wang-Maris-2006
MTOR	PIK3R3	0.0146785	Co-expression	Wang-Maris-2006
MAPK1	BAX	0.0237071	Co-expression	Wang-Hui-2007
BRCA1	BRCA2	0.028912	Co-expression	Wang-Hui-2007
CDK4	BAX	0.00517187	Co-expression	Wang-Hui-2007
RAF1	PARP2	0.00492344	Co-expression	Wang-Hui-2007
RRM2	PARP2	0.00209296	Co-expression	Wang-Hui-2007
BRCA2	BCL2	0.0120545	Co-expression	Ross-Brown-2000
BRAF	STAT3	0.0156322	Co-expression	Ross-Brown-2000
MYC	STAT3	0.00969398	Co-expression	Ross-Brown-2000
MAPK3	PIK3R1	0.00831459	Co-expression	Ross-Brown-2000
PIK3R3	PIK3R1	0.00952425	Co-expression	Ross-Brown-2000
STAT3	JAK1	0.0196932	Co-expression	Williams-Gascoyne-2010
PIK3CA	BRAF	0.0252554	Co-expression	Williams-Gascoyne-2010
MTOR	MAPK3	0.00756282	Co-expression	Williams-Gascoyne-2010
BRCA1	WNT1	0.0302522	Co-expression	Popovici-Pusztai-2010 A
MYC	BAX	0.0176355	Co-expression	Popovici-Pusztai-2010 A
CDK4	MYC	0.01519	Co-expression	Popovici-Pusztai-2010 A
FH	PARP1	0.0257741	Co-expression	Popovici-Pusztai-2010 A
MAP2K1	RAF1	0.0155356	Co-expression	Popovici-Pusztai-2010 A
RRM2	PARP2	0.00836766	Co-expression	Popovici-Pusztai-2010 A
PARP1	STAT3	0.00977609	Co-expression	Tilley-Crystal-2011
p53	EGFR	0.0300495	Co-expression	Tilley-Crystal-2011
CDK4	MYC	0.00655925	Co-expression	Tilley-Crystal-2011
MAPK3	HDAC6	0.018666	Co-expression	Tilley-Crystal-2011
MAP2K1	CDK4	0.00501157	Co-expression	Tilley-Crystal-2011
PIK3R3	PARP1	0.00902331	Co-expression	Tilley-Crystal-2011
MAPK1	BAX	0.0107067	Co-expression	Woodruff-Fahy-2007
MYC	EGFR	0.0219044	Co-expression	Woodruff-Fahy-2007
RAF1	PARP2	0.0136209	Co-expression	Woodruff-Fahy-2007
RRM2	p53	0.016152	Co-expression	Woodruff-Fahy-2007
PARP1	STAT3	0.0194797	Co-expression	Burington-Shaughnessy-2008
BRCA1	BRCA2	0.0101415	Co-expression	Burington-Shaughnessy-2008
MYC	p53	0.0183395	Co-expression	Burington-Shaughnessy-2008
RAD51	BRCA1	0.0152859	Co-expression	Burington-Shaughnessy-2008
RAF1	MAPK1	0.0164894	Co-expression	Burington-Shaughnessy-2008
MUC1	STAT	0.00705365	Co-expression	Brunner-Guttman-Yassky-2019
KRAS	BRAF	0.0260144	Co-expression	Brunner-Guttman-Yassky-2019
MYC	STAT3	0.0108845	Co-expression	Brunner-Guttman-Yassky-2019
NFKBIZ	MYC	0.0150547	Co-expression	Brunner-Guttman-Yassky-2019
RRM2	MAPK1	0.0119009	Co-expression	Brunner-Guttman-Yassky-2019
RRM2	BRCA1	0.0104639	Co-expression	Brunner-Guttman-Yassky-2019
RRM2	RAD51	0.012914	Co-expression	Brunner-Guttman-Yassky-2019
PIK3CA	JAK1	0.00905971	Co-expression	Ceroi-Saas-2016
KRAS	PIK3CA	0.0102411	Co-expression	Ceroi-Saas-2016
BRCA1	PARP2	0.00774334	Co-expression	Ceroi-Saas-2016
BRCA1	BRCA2	0.0133949	Co-expression	Ceroi-Saas-2016
p53	PARP1	0.00585758	Co-expression	Ceroi-Saas-2016
CDK4	PARP1	0.00234327	Co-expression	Ceroi-Saas-2016
CDK4	p53	0.00327341	Co-expression	Ceroi-Saas-2016
FH	CDK4	0.00596349	Co-expression	Ceroi-Saas-2016
RB1	PIK3R1	0.0129557	Co-expression	Ceroi-Saas-2016
MAP2K1	PIK3CD	0.0189619	Co-expression	Ceroi-Saas-2016
RRM2	RAD51	0.00993209	Co-expression	Ceroi-Saas-2016
STAT3	JAK1	0.0201781	Co-expression	Stirewalt-Radich-2008
BRCA1	BRCA2	0.0179881	Co-expression	Stirewalt-Radich-2008
p53	PARP1	0.00797078	Co-expression	Stirewalt-Radich-2008
SEPTIN7	JAK1	0.0161662	Co-expression	Stirewalt-Radich-2008
BRCA1	BRCA2	0.00817556	Co-expression	Skrzypczak-Ostrowsk-2010
EGFR	JAK1	0.0226556	Co-expression	Skrzypczak-Ostrowsk-2010
p53	BAX	0.00902563	Co-expression	Skrzypczak-Ostrowsk-2010
MAP2K1	MAPK1	0.0164697	Co-expression	Skrzypczak-Ostrowsk-2010
PIK3R3	MAP2K1	0.0143726	Co-expression	Skrzypczak-Ostrowsk-2010
RRM2	RAD51	0.0112012	Co-expression	Skrzypczak-Ostrowsk-2010
STAT3	JAK1	0.0240557	Co-expression	Sheffer-Domany-2009 B
p53	BAX	0.0210945	Co-expression	Sheffer-Domany-2009 B
CDK4	PARP1	0.00377441	Co-expression	Sheffer-Domany-2009 B
CDK4	p53	0.00567268	Co-expression	Sheffer-Domany-2009 B
CDK4	MYC	0.00358736	Co-expression	Sheffer-Domany-2009 B
RB1	BRCA2	0.0252782	Co-expression	Sheffer-Domany-2009 B
RRM2	BRCA2	0.00587022	Co-expression	Sheffer-Domany-2009 B
RRM2	BRCA1	0.00599116	Co-expression	Sheffer-Domany-2009 B
RRM2	CDK4	0.00154901	Co-expression	Sheffer-Domany-2009 B
RRM2	RAD51	0.00742352	Co-expression	Sheffer-Domany-2009 B
STAT3	JAK1	0.0118676	Co-expression	Alizadeh-Staudt-2000
PIK3CA	BRAF	0.00980036	Co-expression	Alizadeh-Staudt-2000
MAPK1	BCL2	0.0107879	Co-expression	Alizadeh-Staudt-2000
ARAF	EGFR	0.0172172	Co-expression	Alizadeh-Staudt-2000
RAD51	PARP1	0.00809979	Co-expression	Alizadeh-Staudt-2000
RAD51	BRCA1	0.00815907	Co-expression	Alizadeh-Staudt-2000
RAD51	CDK4	0.0042778	Co-expression	Alizadeh-Staudt-2000
MAPK3	p53	0.0250141	Co-expression	Alizadeh-Staudt-2000
MAP2K1	PARP1	0.0193116	Co-expression	Alizadeh-Staudt-2000
SEPTIN7	JAK1	0.0259013	Co-expression	Alizadeh-Staudt-2000
RRM2	RAD51	0.00865954	Co-expression	Alizadeh-Staudt-2000
PIK3CA	JAK1	0.0210137	Co-expression	Hinze-Grom-2010
MYC	PARP1	0.0143493	Co-expression	Hinze-Grom-2010
NFKBIZ	KRAS	0.0146961	Co-expression	Hinze-Grom-2010
PIK3CD	MYC	0.0198508	Co-expression	Hinze-Grom-2010
CDK4	PARP1	0.0104148	Co-expression	Hinze-Grom-2010
CDK4	MYC	0.00867949	Co-expression	Hinze-Grom-2010
MAP2K1	STAT	0.0200829	Co-expression	Hinze-Grom-2010
RRM2	RAD51	0.0100021	Co-expression	Hinze-Grom-2010
KRAS	MAPK1	0.0156221	Co-expression	Boldrick-Relman-2002
EGFR	STAT3	0.0143428	Co-expression	Boldrick-Relman-2002
CDK4	BRCA2	0.00419022	Co-expression	Boldrick-Relman-2002
CDK4	p53	0.00538847	Co-expression	Boldrick-Relman-2002
CDK4	MYC	0.00337008	Co-expression	Boldrick-Relman-2002
ARAF	EGFR	0.0218633	Co-expression	Boldrick-Relman-2002
MAPK3	p53	0.0225724	Co-expression	Boldrick-Relman-2002
MAPK3	RB1	0.01207	Co-expression	Boldrick-Relman-2002
SEPTIN7	BRCA1	0.014891	Co-expression	Boldrick-Relman-2002
FGFR2	STAT3	0.00617893	Co-expression	Boldrick-Relman-2002
TTN	PARP1	0.00830417	Co-expression	Boldrick-Relman-2002
MUC1	STAT	0.00360174	Co-expression	Lee-Kim-2008
STAT3	MUC1	0.00391435	Co-expression	Lee-Kim-2008
BRCA1	BRCA2	0.0250218	Co-expression	Lee-Kim-2008
MYC	MAPK1	0.00829127	Co-expression	Lee-Kim-2008
FH	PARP1	0.0101196	Co-expression	Lee-Kim-2008
p53	BRCA2	0.0202168	Co-expression	Olmos-de Bono-2012
MYC	BCL2	0.0114879	Co-expression	Olmos-de Bono-2012
MAP2K1	JAK1	0.00586483	Co-expression	Olmos-de Bono-2012
RRM2	RAD51	0.0115669	Co-expression	Olmos-de Bono-2012
STAT3	MUC1	0.00837753	Co-expression	Bild-Nevins-2006 A
p53	PARP1	0.00841757	Co-expression	Bild-Nevins-2006 A
MYC	MAPK1	0.0112287	Co-expression	Bild-Nevins-2006 A
MYC	EGFR	0.00980881	Co-expression	Bild-Nevins-2006 A
CDK4	PARP1	0.00288723	Co-expression	Bild-Nevins-2006 A
FH	PARP1	0.00999647	Co-expression	Bild-Nevins-2006 A
MAP2K1	BAX	0.00967558	Co-expression	Bild-Nevins-2006 A
MAP2K1	p53	0.0122754	Co-expression	Bild-Nevins-2006 A
MAP2K1	CDK4	0.00282064	Co-expression	Bild-Nevins-2006 A
RRM2	RAD51	0.00938169	Co-expression	Bild-Nevins-2006 A
KRAS	PIK3CA	0.00695227	Co-expression	Burczynski-Dorner-2006
p53	PARP1	0.0269789	Co-expression	Burczynski-Dorner-2006
CDK4	PARP1	0.00776078	Co-expression	Burczynski-Dorner-2006
PIK3R1	PIK3CA	0.00519114	Co-expression	Burczynski-Dorner-2006
FH	MAPK1	0.0156865	Co-expression	Burczynski-Dorner-2006
BRCA1	BRCA2	0.00930913	Co-expression	Jorissen-Sieber-2008
p53	BCL2	0.0255752	Co-expression	Jorissen-Sieber-2008
p53	PARP1	0.00900943	Co-expression	Jorissen-Sieber-2008
NFKBIZ	STAT3	0.0211275	Co-expression	Jorissen-Sieber-2008
NFKBIZ	KRAS	0.0181181	Co-expression	Jorissen-Sieber-2008
CDK4	MYC	0.0035063	Co-expression	Jorissen-Sieber-2008
FH	PARP1	0.00768232	Co-expression	Jorissen-Sieber-2008
RB1	BRCA2	0.0100994	Co-expression	Jorissen-Sieber-2008
MAP2K1	JAK1	0.00550658	Co-expression	Jorissen-Sieber-2008
MAP2K1	STAT3	0.00518081	Co-expression	Jorissen-Sieber-2008
MAP2K1	MAPK1	0.0062316	Co-expression	Jorissen-Sieber-2008
MAP2K1	NFKBIZ	0.00360941	Co-expression	Jorissen-Sieber-2008
PIK3R3	MAP2K1	0.00539711	Co-expression	Jorissen-Sieber-2008
RRM2	PARP1	0.00304517	Co-expression	Jorissen-Sieber-2008
RRM2	BRCA1	0.00621286	Co-expression	Jorissen-Sieber-2008
RRM2	RAD51	0.00845147	Co-expression	Jorissen-Sieber-2008
FGFR2	MUC1	0.0107499	Co-expression	Jorissen-Sieber-2008
WNT7B	MAPK3	0.009538	Co-expression	Jorissen-Sieber-2008
PIK3CA	JAK1	0.0142045	Co-expression	Smirnov-Cheung-2012
BRCA1	PARP2	0.0154862	Co-expression	Smirnov-Cheung-2012
BRCA1	PARP1	0.00804602	Co-expression	Smirnov-Cheung-2012
PIK3CD	PARP1	0.00769521	Co-expression	Smirnov-Cheung-2012
FH	PARP2	0.0118598	Co-expression	Smirnov-Cheung-2012
ARAF	p53	0.00324005	Co-expression	Smirnov-Cheung-2012
CDH1	JAK1	0.015484	Co-expression	Smirnov-Cheung-2012
RB1	STAT	0.0148017	Co-expression	Smirnov-Cheung-2012
RAF1	PARP1	0.00117525	Co-expression	Smirnov-Cheung-2012
MAPK3	ARAF	0.00436166	Co-expression	Smirnov-Cheung-2012
MAP2K1	MYC	0.00642737	Co-expression	Smirnov-Cheung-2012
MAP2K1	RAF1	0.0012994	Co-expression	Smirnov-Cheung-2012
RRM2	PARP2	0.0111654	Co-expression	Smirnov-Cheung-2012
PARP1	PARP2	0.00569009	Co-expression	Lee-Fine-2006
MAPK1	PARP1	0.00697852	Co-expression	Lee-Fine-2006
MYC	JAK1	0.0209745	Co-expression	Lee-Fine-2006
PIK3CD	NFKBIZ	0.00893113	Co-expression	Lee-Fine-2006
CDK4	PIK3CA	0.00666848	Co-expression	Lee-Fine-2006
PIK3R3	PARP1	0.00523925	Co-expression	Lee-Fine-2006
RRM2	RAD51	0.00965904	Co-expression	Lee-Fine-2006
STAT3	JAK1	0.00703359	Co-expression	Chowdary-Mazumder-2006
MYC	BRCA1	0.0227582	Co-expression	Chowdary-Mazumder-2006
CDK4	BRCA1	0.00902977	Co-expression	Chowdary-Mazumder-2006
KRAS	BRAF	0.022192	Co-expression	Horiuchi-Sawa-2016
BRCA1	BRCA2	0.0087554	Co-expression	Horiuchi-Sawa-2016
MYC	BRCA2	0.0056256	Co-expression	Horiuchi-Sawa-2016
CDK4	PARP1	0.00454789	Co-expression	Horiuchi-Sawa-2016
FH	CDK4	0.00859891	Co-expression	Horiuchi-Sawa-2016
RB1	BRCA2	0.00330967	Co-expression	Horiuchi-Sawa-2016
MAP2K1	BRAF	0.0109689	Co-expression	Horiuchi-Sawa-2016
MAP2K1	PIK3CA	0.011418	Co-expression	Horiuchi-Sawa-2016
RRM2	CDK4	0.00517925	Co-expression	Horiuchi-Sawa-2016
RRM2	RAD51	0.0108425	Co-expression	Horiuchi-Sawa-2016
BRAF	STAT3	0.0084966	Co-expression	Govoni-Singh-2020
KRAS	BRAF	0.0124761	Co-expression	Govoni-Singh-2020
p53	PARP1	0.005988	Co-expression	Govoni-Singh-2020
MYC	PARP1	0.00542832	Co-expression	Govoni-Singh-2020
PIK3CD	MAPK1	0.0145552	Co-expression	Govoni-Singh-2020
RAD51	FH	0.00942516	Co-expression	Govoni-Singh-2020
RAF1	JAK1	0.00691935	Co-expression	Govoni-Singh-2020
MAPK3	WNT6	0.00595717	Co-expression	Govoni-Singh-2020
RRM2	FH	0.0074594	Co-expression	Govoni-Singh-2020
RRM2	RAD51	0.0227701	Co-expression	Govoni-Singh-2020
FGFR2	MAPK3	0.00513532	Co-expression	Govoni-Singh-2020
WNT7B	MAPK3	0.00157212	Co-expression	Govoni-Singh-2020
p53	PARP1	0.00775058	Co-expression	Shahmanesh-Tomlinson-2015
p53	BRCA1	0.016534	Co-expression	Shahmanesh-Tomlinson-2015
ARAF	CDK4	0.018862	Co-expression	Shahmanesh-Tomlinson-2015
MUC1	STAT	0.0132995	Co-expression	Bigler-Russell-2013
BRCA2	BAX	0.00968152	Co-expression	Bigler-Russell-2013
MYC	BRCA2	0.00433221	Co-expression	Bigler-Russell-2013
MYC	STAT3	0.0052914	Co-expression	Bigler-Russell-2013
NFKBIZ	MYC	0.00669981	Co-expression	Bigler-Russell-2013
RAD51	BRCA1	0.0301666	Co-expression	Bigler-Russell-2013
RB1	MYC	0.00801634	Co-expression	Bigler-Russell-2013
KRAS	MAPK1	0.0166157	Co-expression	Perou-Botstein-1999
CDH1	FH	0.00769275	Co-expression	Perou-Botstein-1999
TTN	MAP2K1	0.0135008	Co-expression	Perou-Botstein-1999
p53	MAPK1	0.0168429	Co-expression	Tian-Shaughnessy-2003 B
MYC	p53	0.0196337	Co-expression	Tian-Shaughnessy-2003 B
RAF1	MAPK1	0.0152101	Co-expression	Tian-Shaughnessy-2003 B
MTOR	STAT3	0.0210438	Co-expression	Tian-Shaughnessy-2003 B
PIK3CA	BRAF	0.00893339	Co-expression	Hirabayashi-Kiyokawa-2017
KRAS	BRAF	0.00812527	Co-expression	Hirabayashi-Kiyokawa-2017
BRCA1	BRCA2	0.0162556	Co-expression	Hirabayashi-Kiyokawa-2017
PIK3CD	MAPK1	0.0260614	Co-expression	Hirabayashi-Kiyokawa-2017
CDK4	p53	0.00913071	Co-expression	Hirabayashi-Kiyokawa-2017
FH	PARP1	0.0137654	Co-expression	Hirabayashi-Kiyokawa-2017
FH	CDK4	0.0092366	Co-expression	Hirabayashi-Kiyokawa-2017
PIK3R3	PARP1	0.00671656	Co-expression	Hirabayashi-Kiyokawa-2017
RRM2	RAD51	0.0137861	Co-expression	Hirabayashi-Kiyokawa-2017
MYC	MAPK1	0.0232158	Co-expression	Peng-Katze-2009
RAD51	BRCA2	0.0161609	Co-expression	Peng-Katze-2009
BRCA1	BRCA2	0.0173757	Co-expression	Chibon-Aurias-2010
p53	BAX	0.02096	Co-expression	Chibon-Aurias-2010
NFKBIZ	MYC	0.00648157	Co-expression	Chibon-Aurias-2010
ARAF	HDAC6	0.0196975	Co-expression	Chibon-Aurias-2010
CDH1	MUC1	0.0181558	Co-expression	Chibon-Aurias-2010
PIK3CA	BRAF	0.0239856	Co-expression	Salas-Chibon-2015
MYC	JAK1	0.008016	Co-expression	Salas-Chibon-2015
NFKBIZ	KRAS	0.0164361	Co-expression	Salas-Chibon-2015
NFKBIZ	MYC	0.00600483	Co-expression	Salas-Chibon-2015
RAF1	MYC	0.00530478	Co-expression	Salas-Chibon-2015
RRM2	BRCA2	0.0115262	Co-expression	Salas-Chibon-2015
RRM2	BRCA1	0.0116304	Co-expression	Salas-Chibon-2015
RRM2	RAD51	0.0118902	Co-expression	Salas-Chibon-2015
STAT3	JAK1	0.0116317	Co-expression	Radtke-Downing-2009
PIK3CA	JAK1	0.0110296	Co-expression	Radtke-Downing-2009
p53	PARP1	0.0102893	Co-expression	Radtke-Downing-2009
CDK4	PARP1	0.00340524	Co-expression	Radtke-Downing-2009
CDK4	BRCA1	0.00790912	Co-expression	Radtke-Downing-2009
MAPK3	ARAF	0.0210076	Co-expression	Radtke-Downing-2009
RRM2	PARP2	0.00891627	Co-expression	Radtke-Downing-2009
RRM2	FH	0.00879964	Co-expression	Radtke-Downing-2009
RRM2	RAD51	0.00961736	Co-expression	Radtke-Downing-2009
MAPK1	PIK3CA	0.00785125	Co-expression	Day-Maxwell-2011
MYC	BCL2	0.0233511	Co-expression	Day-Maxwell-2011
HDAC6	WNT1	0.00579286	Co-expression	Day-Maxwell-2011
FH	PARP1	0.00895816	Co-expression	Day-Maxwell-2011
RAD51	BRCA2	0.0301562	Co-expression	Day-Maxwell-2011
MAP2K1	PARP1	0.00552967	Co-expression	Day-Maxwell-2011
RRM2	RAD51	0.0120204	Co-expression	Day-Maxwell-2011
MAPK1	JAK1	0.027078	Co-expression	Voraphani-Wenzel-2014
ARAF	STAT3	0.00876525	Co-expression	Voraphani-Wenzel-2014
ARAF	p53	0.00536315	Co-expression	Voraphani-Wenzel-2014
RRM2	BRCA2	0.0133098	Co-expression	Voraphani-Wenzel-2014
FGFR2	EGFR	0.00795374	Co-expression	Voraphani-Wenzel-2014
MTOR	RAD51	0.00678439	Co-expression	Voraphani-Wenzel-2014
PIK3CA	JAK1	0.0171269	Co-expression	Pellagatti-Boultwood-2010
BRCA1	BRCA2	0.0152484	Co-expression	Pellagatti-Boultwood-2010
CDK4	PARP1	0.00463712	Co-expression	Pellagatti-Boultwood-2010
MAP2K1	PARP1	0.00807695	Co-expression	Pellagatti-Boultwood-2010
RRM2	RAD51	0.0157762	Co-expression	Pellagatti-Boultwood-2010
MUC1	STAT	0.00831694	Co-expression	Jabbari-Christiano-2016
MYC	STAT3	0.0158069	Co-expression	Jabbari-Christiano-2016
NFKBIZ	MYC	0.0117407	Co-expression	Jabbari-Christiano-2016
RB1	PARP1	0.017567	Co-expression	Jabbari-Christiano-2016
PIK3CA	BRAF	0.0151396	Co-expression	Wong-Shanley-2009 A
MYC	p53	0.0193349	Co-expression	Wong-Shanley-2009 A
NFKBIZ	KRAS	0.0132271	Co-expression	Wong-Shanley-2009 A
CDK4	PARP1	0.00548003	Co-expression	Wong-Shanley-2009 A
PIK3R1	JAK1	0.0133125	Co-expression	Wong-Shanley-2009 A
FH	PARP2	0.0119571	Co-expression	Wong-Shanley-2009 A
RRM2	PARP2	0.0065086	Co-expression	Wong-Shanley-2009 A
RRM2	BRCA2	0.00839078	Co-expression	Wong-Shanley-2009 A
RRM2	BRCA1	0.0109057	Co-expression	Wong-Shanley-2009 A
RRM2	RAD51	0.0102467	Co-expression	Wong-Shanley-2009 A
STAT3	BAX	0.0217407	Co-expression	Bahr-Bowler-2013
CDK4	PARP1	0.0039183	Co-expression	Bahr-Bowler-2013
ARAF	HDAC6	0.00275957	Co-expression	Bahr-Bowler-2013
BRAF	STAT	0.0238388	Co-expression	Wong-Aronow-2007
MYC	p53	0.00858411	Co-expression	Wong-Aronow-2007
NFKBIZ	KRAS	0.011829	Co-expression	Wong-Aronow-2007
CDK4	PARP1	0.00561559	Co-expression	Wong-Aronow-2007
PIK3R1	JAK1	0.0120213	Co-expression	Wong-Aronow-2007
RRM2	PARP2	0.00632759	Co-expression	Wong-Aronow-2007
RRM2	BRCA2	0.0108811	Co-expression	Wong-Aronow-2007
RRM2	BRCA1	0.0108137	Co-expression	Wong-Aronow-2007
RRM2	RAD51	0.010154	Co-expression	Wong-Aronow-2007
WNT1	WNT6	0.00604417	Co-expression	Niu-Wang-2010
WNT1	MUC1	0.00501472	Co-expression	Niu-Wang-2010
MYC	BCL2	0.0174679	Co-expression	Niu-Wang-2010
CDH1	NFKBIZ	0.00788859	Co-expression	Niu-Wang-2010
PIK3CA	STAT	0.0213491	Co-expression	Perou-Botstein-2000
ARAF	HDAC6	0.0155293	Co-expression	Perou-Botstein-2000
RAF1	ARAF	0.020159	Co-expression	Perou-Botstein-2000
MAP2K1	BRCA1	0.017212	Co-expression	Perou-Botstein-2000
PIK3R3	MUC1	0.00784819	Co-expression	Perou-Botstein-2000
RRM2	BRCA2	0.00759856	Co-expression	Perou-Botstein-2000
RRM2	CDK4	0.00815879	Co-expression	Perou-Botstein-2000
PARP1	STAT3	0.0131854	Co-expression	Einecke-Halloran-2010
p53	STAT3	0.0134366	Co-expression	Einecke-Halloran-2010
p53	PARP1	0.00738	Co-expression	Einecke-Halloran-2010
NFKBIZ	JAK1	0.0126334	Co-expression	Einecke-Halloran-2010
MAP2K1	PARP1	0.00518486	Co-expression	Einecke-Halloran-2010
MAP2K1	RAF1	0.00851904	Co-expression	Einecke-Halloran-2010
RRM2	BRCA2	0.0134275	Co-expression	Einecke-Halloran-2010
RRM2	BRCA1	0.0125314	Co-expression	Einecke-Halloran-2010
RRM2	RAD51	0.0120591	Co-expression	Einecke-Halloran-2010
p53	EGFR	0.0257577	Co-expression	Strulovici-Barel-Crystal-2010
MAP2K1	CDK4	0.0046007	Co-expression	Strulovici-Barel-Crystal-2010
RRM2	BRCA2	0.0173534	Co-expression	Strulovici-Barel-Crystal-2010
p53	PARP1	0.00271526	Co-expression	Holland-Grimbacher-2007
MYC	BCL2	0.017015	Co-expression	Holland-Grimbacher-2007
MYC	PARP1	0.00310262	Co-expression	Holland-Grimbacher-2007
EGFR	MAPK1	0.0195666	Co-expression	Wu-Garvey-2007
SEPTIN7	JAK1	0.0118023	Co-expression	Wu-Garvey-2007
SEPTIN7	PIK3CA	0.00931039	Co-expression	Wu-Garvey-2007
KRAS	PIK3CA	0.0216485	Co-expression	Yang-Steele-2012
ARAF	HDAC6	0.00725884	Co-expression	Yang-Steele-2012
BRCA1	BRCA2	0.00661503	Co-expression	Ramaswamy-Golub-2001
MYC	p53	0.0125627	Co-expression	Ramaswamy-Golub-2001
PIK3CD	STAT3	0.0141732	Co-expression	Ramaswamy-Golub-2001
CDK4	p53	0.0165199	Co-expression	Ramaswamy-Golub-2001
RB1	p53	0.0142211	Co-expression	Ramaswamy-Golub-2001
MAPK3	ARAF	0.00793466	Co-expression	Ramaswamy-Golub-2001
MAPK3	RAF1	0.00202495	Co-expression	Ramaswamy-Golub-2001
MAP2K1	RAF1	0.00790091	Co-expression	Ramaswamy-Golub-2001
SEPTIN7	CDK4	0.0120962	Co-expression	Ramaswamy-Golub-2001
PIK3R3	PIK3R1	0.016789	Co-expression	Ramaswamy-Golub-2001
MTOR	MAP2K1	0.0252423	Co-expression	Ramaswamy-Golub-2001
MAPK1	PIK3CA	0.00769522	Co-expression	Hendrix-Cho-2006
BRCA1	STAT3	0.021341	Co-expression	Hendrix-Cho-2006
PIK3CD	PIK3CA	0.00826635	Co-expression	Hendrix-Cho-2006
FH	PARP1	0.00529575	Co-expression	Hendrix-Cho-2006
RB1	PIK3R1	0.0157395	Co-expression	Hendrix-Cho-2006
RRM2	CDH1	0.0100711	Co-expression	Hendrix-Cho-2006
WNT7B	WNT1	0.0142212	Co-expression	Hendrix-Cho-2006
BRCA1	BRCA2	0.00551371	Co-expression	Kim-Paik-2011
MYC	BRCA2	0.0136057	Co-expression	Kim-Paik-2011
RRM2	PARP2	0.0145385	Co-expression	Kim-Paik-2011
FGFR2	MUC1	0.0154458	Co-expression	Kim-Paik-2011
MUC1	STAT	0.00974817	Co-expression	Brodmerkel-Krueger-2019 B
MYC	STAT3	0.0163962	Co-expression	Brodmerkel-Krueger-2019 B
CDH1	MYC	0.0121449	Co-expression	Brodmerkel-Krueger-2019 B
RRM2	MAPK1	0.00706791	Co-expression	Brodmerkel-Krueger-2019 B
RRM2	BRCA1	0.00420677	Co-expression	Brodmerkel-Krueger-2019 B
RRM2	RAD51	0.0064373	Co-expression	Brodmerkel-Krueger-2019 B
BRCA1	BAX	0.0127506	Co-expression	Li-Wang-2010 A
p53	BAX	0.0140243	Co-expression	Li-Wang-2010 A
MYC	STAT3	0.00956724	Co-expression	Li-Wang-2010 A
PIK3CD	BCL2	0.0297485	Co-expression	Li-Wang-2010 A
FH	PARP1	0.0127212	Co-expression	Li-Wang-2010 A
FH	CDK4	0.0123204	Co-expression	Li-Wang-2010 A
ARAF	HDAC6	0.0261797	Co-expression	Li-Wang-2010 A
MAPK3	HDAC6	0.00621048	Co-expression	Li-Wang-2010 A
MAPK3	ARAF	0.00513743	Co-expression	Li-Wang-2010 A
MAP2K1	BRAF	0.0153882	Co-expression	Li-Wang-2010 A
MUC1	STAT	0.00977007	Co-expression	Brodmerkel-Krueger-2019 A
MYC	STAT3	0.0173698	Co-expression	Brodmerkel-Krueger-2019 A
RRM2	BRCA1	0.00665075	Co-expression	Brodmerkel-Krueger-2019 A
RRM2	RAD51	0.00667291	Co-expression	Brodmerkel-Krueger-2019 A
STAT3	JAK1	0.00964525	Co-expression	Salaverria-Siebert-2011
BRCA1	BRCA2	0.0186916	Co-expression	Salaverria-Siebert-2011
p53	PARP1	0.0102819	Co-expression	Salaverria-Siebert-2011
CDK4	PARP2	0.00440992	Co-expression	Salaverria-Siebert-2011
ARAF	HDAC6	0.0153546	Co-expression	Salaverria-Siebert-2011
EGFR	MUC1	0.0140254	Co-expression	Liu-Bratslavsky-2013
MYC	BCL2	0.00998266	Co-expression	Liu-Bratslavsky-2013
MAPK3	p53	0.0179148	Co-expression	Liu-Bratslavsky-2013
RRM2	BRCA2	0.0167078	Co-expression	Liu-Bratslavsky-2013
RRM2	BRCA1	0.0188767	Co-expression	Liu-Bratslavsky-2013
RRM2	RAD51	0.0176928	Co-expression	Liu-Bratslavsky-2013
PARP1	STAT3	0.0129731	Co-expression	Reeve-Halloran-2013
MAPK1	PARP1	0.0101852	Co-expression	Reeve-Halloran-2013
p53	PARP1	0.00918734	Co-expression	Reeve-Halloran-2013
NFKBIZ	JAK1	0.0126545	Co-expression	Reeve-Halloran-2013
NFKBIZ	MYC	0.0064179	Co-expression	Reeve-Halloran-2013
CDH1	MUC1	0.0118389	Co-expression	Reeve-Halloran-2013
MAP2K1	PARP1	0.00586588	Co-expression	Reeve-Halloran-2013
MAP2K1	RAF1	0.010229	Co-expression	Reeve-Halloran-2013
RRM2	BRCA2	0.0122018	Co-expression	Reeve-Halloran-2013
RRM2	BRCA1	0.0112118	Co-expression	Reeve-Halloran-2013
RRM2	RAD51	0.0119358	Co-expression	Reeve-Halloran-2013
BRCA1	BRCA2	0.0230261	Co-expression	Seok-Tompkins-2013
MYC	PARP1	0.00601872	Co-expression	Seok-Tompkins-2013
CDK4	PARP2	0.0100113	Co-expression	Seok-Tompkins-2013
CDK4	PARP1	0.0058001	Co-expression	Seok-Tompkins-2013
PIK3R1	JAK1	0.0149075	Co-expression	Seok-Tompkins-2013
RRM2	BRCA1	0.00993912	Co-expression	Seok-Tompkins-2013
RRM2	RAD51	0.0121792	Co-expression	Seok-Tompkins-2013
BRCA1	BRCA2	0.0203932	Co-expression	Shalhoub-Martin-2010
MAP2K1	MYC	0.0156687	Co-expression	Shalhoub-Martin-2010
BRCA2	MUC1	0.0114238	Co-expression	Cuadras-Greenberg-2002
MYC	STAT3	0.00729518	Co-expression	Cuadras-Greenberg-2002
NFKBIZ	STAT3	0.012348	Co-expression	Cuadras-Greenberg-2002
ARAF	PARP2	0.0168416	Co-expression	Cuadras-Greenberg-2002
RB1	MUC1	0.0136792	Co-expression	Cuadras-Greenberg-2002
RAF1	CDK4	0.0119989	Co-expression	Cuadras-Greenberg-2002
STAT3	JAK1	0.0169042	Co-expression	Mallon-McKay-2013
BRCA1	PARP2	0.00656086	Co-expression	Mallon-McKay-2013
FH	CDK4	0.00930624	Co-expression	Mallon-McKay-2013
RAD51	PARP2	0.00520697	Co-expression	Mallon-McKay-2013
RRM2	p53	0.0180469	Co-expression	Mallon-McKay-2013
MTOR	RAF1	0.00320353	Co-expression	Mallon-McKay-2013
STAT3	MUC1	0.018264	Co-expression	Smeets-Christiaens-2011
p53	BAX	0.0131954	Co-expression	Smeets-Christiaens-2011
FH	PARP1	0.00892396	Co-expression	Smeets-Christiaens-2011
RAD51	PARP2	0.00654	Co-expression	Smeets-Christiaens-2011
STAT3	BAX	0.0151752	Co-expression	Bild-Nevins-2006 C
MYC	p53	0.0155377	Co-expression	Bild-Nevins-2006 C
CDK4	PARP1	0.00468752	Co-expression	Bild-Nevins-2006 C
FH	PARP1	0.0104474	Co-expression	Bild-Nevins-2006 C
PIK3CA	JAK1	0.0172648	Co-expression	Vallat-Bahram-2013
NFKBIZ	MYC	0.00450551	Co-expression	Vallat-Bahram-2013
CDK4	p53	0.0046989	Co-expression	Vallat-Bahram-2013
STAT3	JAK1	0.026696	Co-expression	Verhaak-Valk-2009
p53	PARP1	0.00648217	Co-expression	Verhaak-Valk-2009
PIK3CD	STAT	0.0147097	Co-expression	Verhaak-Valk-2009
CDK4	p53	0.00386798	Co-expression	Verhaak-Valk-2009
MAP2K1	MAPK1	0.00872141	Co-expression	Verhaak-Valk-2009
MAP2K1	MAPK3	0.00688108	Co-expression	Verhaak-Valk-2009
RRM2	BRCA2	0.00989261	Co-expression	Verhaak-Valk-2009
WNT1	WNT6	0.0245304	Co-expression	Dhage-Schneider-2018
CDK4	PARP2	0.00800964	Co-expression	Dhage-Schneider-2018
PIK3R1	NFKBIZ	0.0197351	Co-expression	Dhage-Schneider-2018
RAD51	PARP1	0.0109678	Co-expression	Dhage-Schneider-2018
MAPK3	ARAF	0.00860721	Co-expression	Dhage-Schneider-2018
PIK3R3	BRCA2	0.0166421	Co-expression	Dhage-Schneider-2018
PIK3R3	PARP1	0.00818323	Co-expression	Dhage-Schneider-2018
STAT3	JAK1	0.00764715	Co-expression	Gadd-Perlman-2012
BRCA1	BRCA2	0.024571	Co-expression	Gadd-Perlman-2012
FH	PARP1	0.0156756	Co-expression	Gadd-Perlman-2012
RAF1	PIK3CA	0.00766993	Co-expression	Gadd-Perlman-2012
MAP2K1	PIK3CA	0.00757071	Co-expression	Gadd-Perlman-2012
RRM2	BRCA2	0.0091492	Co-expression	Gadd-Perlman-2012
RRM2	RAD51	0.0101665	Co-expression	Gadd-Perlman-2012
MUC1	STAT	0.00839984	Co-expression	Suárez-Fariñas-Krueger-2012
MYC	STAT3	0.0162829	Co-expression	Suárez-Fariñas-Krueger-2012
NFKBIZ	MYC	0.0149162	Co-expression	Suárez-Fariñas-Krueger-2012
CDH1	MYC	0.0125512	Co-expression	Suárez-Fariñas-Krueger-2012
RRM2	BRCA1	0.005778	Co-expression	Suárez-Fariñas-Krueger-2012
RRM2	RAD51	0.00637651	Co-expression	Suárez-Fariñas-Krueger-2012
STAT3	JAK1	0.0277726	Co-expression	Wouters-Delwel-2009
p53	PARP1	0.00633286	Co-expression	Wouters-Delwel-2009
PIK3CD	STAT	0.0138351	Co-expression	Wouters-Delwel-2009
CDK4	p53	0.00366346	Co-expression	Wouters-Delwel-2009
MAP2K1	MAPK1	0.00847964	Co-expression	Wouters-Delwel-2009
RRM2	BRCA2	0.00860281	Co-expression	Wouters-Delwel-2009
RRM2	RAD51	0.00988225	Co-expression	Wouters-Delwel-2009
PARP1	BAX	0.0185098	Co-expression	Dobbin-Giordano-2005
MYC	p53	0.00592595	Co-expression	Dobbin-Giordano-2005
CDK4	p53	0.00461458	Co-expression	Dobbin-Giordano-2005
CDK4	MYC	0.00358879	Co-expression	Dobbin-Giordano-2005
CDH1	MUC1	0.0147356	Co-expression	Dobbin-Giordano-2005
MAP2K1	FH	0.0206763	Co-expression	Dobbin-Giordano-2005
RRM2	BRCA1	0.0117136	Co-expression	Dobbin-Giordano-2005
RRM2	RAD51	0.0149281	Co-expression	Dobbin-Giordano-2005
BRCA1	JAK1	0.0147998	Co-expression	Solimena-Marchetti-2018 B
MYC	EGFR	0.00448824	Co-expression	Solimena-Marchetti-2018 B
PIK3R1	JAK1	0.0189731	Co-expression	Solimena-Marchetti-2018 B
PIK3R1	EGFR	0.00542934	Co-expression	Solimena-Marchetti-2018 B
PARP1	BRAF	0.00904504	Co-expression	Scott-Rimsza-2014
BRCA1	PARP2	0.0096734	Co-expression	Scott-Rimsza-2014
p53	PARP1	0.00761343	Co-expression	Scott-Rimsza-2014
PIK3R1	JAK1	0.0129607	Co-expression	Scott-Rimsza-2014
MAP2K1	PARP1	0.00560383	Co-expression	Scott-Rimsza-2014
RRM2	RAD51	0.0181164	Co-expression	Scott-Rimsza-2014
BRCA1	BRCA2	0.00877209	Co-expression	Kaiser-Aronow-2007
p53	BAX	0.0227034	Co-expression	Kaiser-Aronow-2007
CDK4	MYC	0.0051292	Co-expression	Kaiser-Aronow-2007
RAD51	PARP2	0.0116435	Co-expression	Kaiser-Aronow-2007
BRCA1	BRCA2	0.0127477	Co-expression	Li-Bleecker-2015
p53	STAT3	0.0103828	Co-expression	Li-Bleecker-2015
CDK4	p53	0.00527945	Co-expression	Li-Bleecker-2015
MAPK3	CDK4	0.00787909	Co-expression	Li-Bleecker-2015
SEPTIN7	PIK3CA	0.00537267	Co-expression	Li-Bleecker-2015
RRM2	RAD51	0.00753943	Co-expression	Li-Bleecker-2015
FGFR2	MUC1	0.00726148	Co-expression	Li-Bleecker-2015
FGFR2	EGFR	0.00506947	Co-expression	Li-Bleecker-2015
MUC1	STAT	0.00633241	Co-expression	Tomalin-Krueger-2020
MYC	BAX	0.00801657	Co-expression	Tomalin-Krueger-2020
MYC	BRCA2	0.0082362	Co-expression	Tomalin-Krueger-2020
RRM2	BRCA2	0.00500514	Co-expression	Tomalin-Krueger-2020
RRM2	BRCA1	0.00548029	Co-expression	Tomalin-Krueger-2020
RRM2	RAD51	0.00648453	Co-expression	Tomalin-Krueger-2020
FGFR2	CDH1	0.0109007	Co-expression	Tomalin-Krueger-2020
PARP1	STAT	0.01097	Co-expression	Shimada-Tanaka-2019
p53	BAX	0.0191082	Co-expression	Shimada-Tanaka-2019
MAP2K1	CDH1	0.0116305	Co-expression	Shimada-Tanaka-2019
STAT3	JAK1	0.00227869	Co-expression	Hummel-Siebert-2006
BRCA1	PARP2	0.0167477	Co-expression	Hummel-Siebert-2006
BRCA1	BRCA2	0.0152488	Co-expression	Hummel-Siebert-2006
PIK3CD	JAK1	0.0079525	Co-expression	Hummel-Siebert-2006
PIK3R1	KRAS	0.0167883	Co-expression	Hummel-Siebert-2006
BRCA2	BAX	0.0151413	Co-expression	Haugen-Van Houten-2010
CDK4	BRCA2	0.0071736	Co-expression	Haugen-Van Houten-2010
CDK4	PARP1	0.00421162	Co-expression	Haugen-Van Houten-2010
PIK3R3	BRCA2	0.0138014	Co-expression	Haugen-Van Houten-2010
MAPK1	PIK3CA	0.0168186	Co-expression	Lv-Zhang-2017
HDAC6	CDK4	0.00620632	Co-expression	Lv-Zhang-2017
ARAF	CDK4	0.0020151	Co-expression	Lv-Zhang-2017
ARAF	HDAC6	0.009597	Co-expression	Lv-Zhang-2017
RAF1	PIK3CD	0.0142312	Co-expression	Lv-Zhang-2017
RRM2	RAD51	0.0137911	Co-expression	Lv-Zhang-2017
PARP1	BRCA2	0.0106688	Co-expression	Freedman-Nevins-2011
MAPK1	STAT	0.0104452	Co-expression	Freedman-Nevins-2011
FH	STAT	0.0149188	Co-expression	Freedman-Nevins-2011
RRM2	BRCA1	0.00982249	Co-expression	Freedman-Nevins-2011
BRCA2	PARP2	0.00315588	Co-expression	Meyer-Debatin-2011
PIK3CA	JAK1	0.0168496	Co-expression	Meyer-Debatin-2011
p53	PARP1	0.00411735	Co-expression	Meyer-Debatin-2011
CDK4	PARP1	0.00150888	Co-expression	Meyer-Debatin-2011
CDK4	p53	0.00423853	Co-expression	Meyer-Debatin-2011
FH	MAPK1	0.00806868	Co-expression	Meyer-Debatin-2011
RAD51	BRCA2	0.00452402	Co-expression	Meyer-Debatin-2011
PIK3R3	BRCA2	0.00377568	Co-expression	Meyer-Debatin-2011
BRCA1	PARP1	0.00898801	Co-expression	Toedter-Baribaud-2011
p53	BCL2	0.01327	Co-expression	Toedter-Baribaud-2011
MYC	p53	0.00972136	Co-expression	Toedter-Baribaud-2011
NFKBIZ	STAT3	0.0204529	Co-expression	Toedter-Baribaud-2011
CDK4	p53	0.00480944	Co-expression	Toedter-Baribaud-2011
CDK4	MYC	0.00415458	Co-expression	Toedter-Baribaud-2011
MAP2K1	BAX	0.0100558	Co-expression	Toedter-Baribaud-2011
MAP2K1	MAPK1	0.0122559	Co-expression	Toedter-Baribaud-2011
RRM2	BRCA2	0.00923452	Co-expression	Toedter-Baribaud-2011
RRM2	BRCA1	0.00964341	Co-expression	Toedter-Baribaud-2011
RRM2	RAD51	0.00931393	Co-expression	Toedter-Baribaud-2011
PIK3CA	STAT	0.00757754	Co-expression	Nakamura-Takeuchi-2016
PARP1	PARP2	0.00821844	Co-expression	Nakamura-Takeuchi-2016
CDK4	p53	0.00785243	Co-expression	Nakamura-Takeuchi-2016
RAF1	STAT3	0.00456301	Co-expression	Nakamura-Takeuchi-2016
MAP2K1	p53	0.00506871	Co-expression	Nakamura-Takeuchi-2016
SEPTIN7	PIK3CA	0.00597962	Co-expression	Nakamura-Takeuchi-2016
RRM2	RAD51	0.0153423	Co-expression	Nakamura-Takeuchi-2016
MTOR	MAP2K1	0.00496795	Co-expression	Nakamura-Takeuchi-2016
BRCA1	BRCA2	0.00427426	Co-expression	Phatak-Kopelovich-2019
BRCA1	PARP1	0.00522478	Co-expression	Phatak-Kopelovich-2019
MYC	EGFR	0.0130723	Co-expression	Phatak-Kopelovich-2019
RAF1	NFKBIZ	0.00886361	Co-expression	Phatak-Kopelovich-2019
MAPK3	MUC1	0.0169147	Co-expression	Phatak-Kopelovich-2019
MAP2K1	CDH1	0.0037947	Co-expression	Phatak-Kopelovich-2019
PIK3R3	BRCA2	0.00898306	Co-expression	Phatak-Kopelovich-2019
STAT3	JAK1	0.0118326	Co-expression	Elashoff-Topol-2011 A
MAPK1	STAT3	0.00911548	Co-expression	Elashoff-Topol-2011 A
PIK3CD	STAT3	0.0056574	Co-expression	Elashoff-Topol-2011 A
RAF1	PIK3CD	0.00349191	Co-expression	Elashoff-Topol-2011 A
RRM2	RAD51	0.0113073	Co-expression	Elashoff-Topol-2011 A
BRAF	JAK1	0.0172926	Co-expression	Singh-Celli-2011
CDK4	MYC	0.0104958	Co-expression	Singh-Celli-2011
PIK3R1	STAT	0.0118819	Co-expression	Singh-Celli-2011
p53	BAX	0.0251974	Co-expression	Tsukamoto-Sugihara-2011
NFKBIZ	JAK1	0.0201428	Co-expression	Tsukamoto-Sugihara-2011
CDK4	PARP1	0.00284884	Co-expression	Tsukamoto-Sugihara-2011
CDK4	MYC	0.00172217	Co-expression	Tsukamoto-Sugihara-2011
RB1	BRCA2	0.0163354	Co-expression	Tsukamoto-Sugihara-2011
MAPK3	MUC1	0.00248654	Co-expression	Tsukamoto-Sugihara-2011
SEPTIN7	PIK3CA	0.0170306	Co-expression	Tsukamoto-Sugihara-2011
BRAF	STAT3	0.0217802	Co-expression	Payton-Ley-2009
p53	BAX	0.0278337	Co-expression	Sheffer-Domany-2009 A
CDK4	p53	0.00820512	Co-expression	Sheffer-Domany-2009 A
CDK4	MYC	0.00587636	Co-expression	Sheffer-Domany-2009 A
RB1	BRCA2	0.0230269	Co-expression	Sheffer-Domany-2009 A
MAPK3	MUC1	0.0113767	Co-expression	Sheffer-Domany-2009 A
RRM2	BAX	0.0075344	Co-expression	Sheffer-Domany-2009 A
PIK3CA	JAK1	0.0159108	Co-expression	Balgobind-den Boer-2011
PIK3CA	BRAF	0.0102556	Co-expression	Balgobind-den Boer-2011
CDK4	PARP1	0.00153904	Co-expression	Balgobind-den Boer-2011
RAD51	BRCA1	0.0245121	Co-expression	Balgobind-den Boer-2011
MAP2K1	STAT	0.0108362	Co-expression	Balgobind-den Boer-2011
RRM2	BRCA2	0.00957124	Co-expression	Balgobind-den Boer-2011
RRM2	RAD51	0.0114488	Co-expression	Balgobind-den Boer-2011
PARP1	STAT3	0.0115072	Co-expression	Petruzziello-Pellegrini-Marsden-2012
RAF1	JAK1	0.00460661	Co-expression	Petruzziello-Pellegrini-Marsden-2012
RRM2	CDK4	0.0102002	Co-expression	Petruzziello-Pellegrini-Marsden-2012
BRCA1	BRCA2	0.00557631	Co-expression	Gómez-Abad-Piris-2011
BRCA1	PARP1	0.00529718	Co-expression	Gómez-Abad-Piris-2011
p53	STAT3	0.0136412	Co-expression	Gómez-Abad-Piris-2011
CDK4	BRCA2	0.0103802	Co-expression	Gómez-Abad-Piris-2011
ARAF	JAK1	0.0113108	Co-expression	Gómez-Abad-Piris-2011
RAD51	BRCA1	0.00461954	Co-expression	Gómez-Abad-Piris-2011
SEPTIN7	PIK3CA	0.011316	Co-expression	Gómez-Abad-Piris-2011
FGFR2	MUC1	0.0061766	Co-expression	Gómez-Abad-Piris-2011
MTOR	RAF1	0.0100072	Co-expression	Gómez-Abad-Piris-2011
BRCA1	PARP2	0.010296	Co-expression	Bos-Massagué-2009
MYC	BAX	0.0051694	Co-expression	Bos-Massagué-2009
MYC	STAT3	0.00477664	Co-expression	Bos-Massagué-2009
MYC	MAPK1	0.00554452	Co-expression	Bos-Massagué-2009
FH	PARP1	0.0144571	Co-expression	Bos-Massagué-2009
ARAF	HDAC6	0.0321463	Co-expression	Bos-Massagué-2009
MAPK3	ARAF	0.00603776	Co-expression	Bos-Massagué-2009
PIK3R3	PIK3R1	0.0185925	Co-expression	Bos-Massagué-2009
RRM2	RAD51	0.0211569	Co-expression	Bos-Massagué-2009
STAT3	JAK1	0.00730829	Co-expression	Beane-Spira-2007
MAPK1	PIK3CA	0.00958667	Co-expression	Beane-Spira-2007
CDH1	JAK1	0.0103121	Co-expression	Beane-Spira-2007
RAF1	JAK1	0.0066288	Co-expression	Beane-Spira-2007
MAP2K1	JAK1	0.0049991	Co-expression	Beane-Spira-2007
MAP2K1	STAT3	0.00861105	Co-expression	Beane-Spira-2007
PIK3CA	JAK1	0.0192751	Co-expression	Wang-McClelland-2010 A
CDK4	BAX	0.00774807	Co-expression	Wang-McClelland-2010 A
MAP2K1	STAT	0.00582497	Co-expression	Wang-McClelland-2010 A
MAP2K1	BRAF	0.011761	Co-expression	Wang-McClelland-2010 A
MAP2K1	KRAS	0.0121173	Co-expression	Wang-McClelland-2010 A
PIK3R3	MYC	0.0103757	Co-expression	Wang-McClelland-2010 A
RRM2	RAD51	0.0104696	Co-expression	Wang-McClelland-2010 A
BRCA2	PARP2	0.00960446	Co-expression	Wang-Cheung-2015
BRCA1	PARP2	0.00839672	Co-expression	Wang-Cheung-2015
PIK3CD	MYC	0.018281	Co-expression	Wang-Cheung-2015
CDK4	PARP2	0.0036675	Co-expression	Wang-Cheung-2015
CDK4	BRCA2	0.00691369	Co-expression	Wang-Cheung-2015
CDK4	BRCA1	0.00574087	Co-expression	Wang-Cheung-2015
HDAC6	BAX	0.0105386	Co-expression	Wang-Cheung-2015
FH	CDK4	0.00919962	Co-expression	Wang-Cheung-2015
RAD51	PARP2	0.00971035	Co-expression	Wang-Cheung-2015
RAD51	CDK4	0.00690982	Co-expression	Wang-Cheung-2015
RB1	PIK3CA	0.0111178	Co-expression	Wang-Cheung-2015
RAF1	KRAS	0.0118485	Co-expression	Wang-Cheung-2015
MAPK3	WNT6	0.00807327	Co-expression	Wang-Cheung-2015
MTOR	PARP2	0.0109336	Co-expression	Wang-Cheung-2015
MAPK1	STAT3	0.0160692	Co-expression	Taylor-Kwo-2008
MYC	PARP1	0.00235346	Co-expression	Taylor-Kwo-2008
FH	PARP1	0.00920244	Co-expression	Taylor-Kwo-2008
BRCA1	BRCA2	0.0227687	Co-expression	Okayama-Yokota-2012
FH	PARP1	0.0104353	Co-expression	Okayama-Yokota-2012
CDH1	MUC1	0.00445554	Co-expression	Okayama-Yokota-2012
RRM2	BRCA1	0.0047024	Co-expression	Okayama-Yokota-2012
RRM2	RAD51	0.0066155	Co-expression	Okayama-Yokota-2012
BRAF	STAT	0.0137022	Co-expression	Warren-Tompkins-2009
CDK4	PARP1	0.00329307	Co-expression	Warren-Tompkins-2009
PIK3R1	JAK1	0.013384	Co-expression	Warren-Tompkins-2009
KRAS	BRAF	0.0228075	Co-expression	Xiao-Tompkins-2011
CDK4	PARP2	0.00702375	Co-expression	Xiao-Tompkins-2011
CDK4	PARP1	0.00245637	Co-expression	Xiao-Tompkins-2011
CDK4	p53	0.0075575	Co-expression	Xiao-Tompkins-2011
FH	CDK4	0.00770407	Co-expression	Xiao-Tompkins-2011
MAP2K1	RB1	0.0119959	Co-expression	Xiao-Tompkins-2011
PARP1	BRAF	0.010379	Co-expression	Tateno-Hirabayashi-2013
MTOR	PIK3R1	0.00910755	Co-expression	Tateno-Hirabayashi-2013
MTOR	RAF1	0.00319634	Co-expression	Tateno-Hirabayashi-2013
MTOR	MAP2K1	0.00619914	Co-expression	Tateno-Hirabayashi-2013
PIK3CA	STAT	0.00749925	Co-expression	Maertzdorf-Kaufmann-2011
KRAS	PIK3CA	0.00785689	Co-expression	Maertzdorf-Kaufmann-2011
RAF1	PIK3CD	0.00704921	Co-expression	Maertzdorf-Kaufmann-2011
RRM2	RAD51	0.0136589	Co-expression	Maertzdorf-Kaufmann-2011
MTOR	MAP2K1	0.00908769	Co-expression	Maertzdorf-Kaufmann-2011
BRCA2	WNT1	0.019268	Co-expression	Sotiriou-Delorenzi-2006
RAF1	STAT3	0.0209514	Co-expression	Sotiriou-Delorenzi-2006
MAP2K1	MAPK1	0.0116024	Co-expression	Sotiriou-Delorenzi-2006
WNT7B	PIK3R3	0.0343434	Co-expression	Sotiriou-Delorenzi-2006
MAPK1	PIK3CA	0.0143074	Co-expression	Dombroski-Spielman-2010
CDK4	BRCA1	0.011815	Co-expression	Dombroski-Spielman-2010
ARAF	p53	0.0127903	Co-expression	Dombroski-Spielman-2010
RAD51	BRCA2	0.00345852	Co-expression	Dombroski-Spielman-2010
RRM2	PIK3R3	0.00397903	Co-expression	Dombroski-Spielman-2010
p53	PARP1	0.014114	Co-expression	Sabatier-Bertucci-2011 A
MYC	STAT3	0.0151542	Co-expression	Sabatier-Bertucci-2011 A
CDK4	BAX	0.0109205	Co-expression	Sabatier-Bertucci-2011 A
PIK3R1	JAK1	0.0185261	Co-expression	Sabatier-Bertucci-2011 A
PIK3R1	NFKBIZ	0.0231066	Co-expression	Sabatier-Bertucci-2011 A
MAP2K1	STAT	0.0123138	Co-expression	Sabatier-Bertucci-2011 A
PIK3CA	BRAF	0.0144677	Co-expression	De Jager-Oksenberg-2009
p53	PARP1	0.00463387	Co-expression	De Jager-Oksenberg-2009
CDK4	PARP1	0.00143021	Co-expression	De Jager-Oksenberg-2009
PIK3R1	JAK1	0.0167021	Co-expression	De Jager-Oksenberg-2009
FH	CDK4	0.00659208	Co-expression	De Jager-Oksenberg-2009
MAP2K1	MAPK1	0.0114843	Co-expression	De Jager-Oksenberg-2009
MAP2K1	FH	0.0124987	Co-expression	De Jager-Oksenberg-2009
MAP2K1	RB1	0.0101246	Co-expression	De Jager-Oksenberg-2009
RRM2	BRCA1	0.0142651	Co-expression	De Jager-Oksenberg-2009
STAT3	JAK1	0.00438547	Co-expression	Scholtysik-Küppers-2015
BRCA1	BRCA2	0.0120396	Co-expression	Scholtysik-Küppers-2015
p53	MAPK1	0.0115669	Co-expression	Scholtysik-Küppers-2015
PIK3CD	JAK1	0.0078486	Co-expression	Scholtysik-Küppers-2015
PIK3R1	STAT	0.00462562	Co-expression	Scholtysik-Küppers-2015
ARAF	HDAC6	0.015986	Co-expression	Scholtysik-Küppers-2015
WNT1	WNT6	0.00728652	Co-expression	Wardell-McDonnell-2012
PARP1	STAT	0.00691818	Co-expression	Wardell-McDonnell-2012
BRCA1	PARP1	0.0034399	Co-expression	Wardell-McDonnell-2012
CDK4	PARP2	0.00148979	Co-expression	Wardell-McDonnell-2012
CDK4	BRCA1	0.00252331	Co-expression	Wardell-McDonnell-2012
MTOR	WNT1	0.00736494	Co-expression	Wardell-McDonnell-2012
STAT3	JAK1	0.00619696	Co-expression	Spira-Brody-2007
MAPK1	PIK3CA	0.00599323	Co-expression	Spira-Brody-2007
MYC	PIK3CA	0.00487068	Co-expression	Spira-Brody-2007
CDH1	STAT3	0.0227011	Co-expression	Spira-Brody-2007
RAF1	JAK1	0.00294482	Co-expression	Spira-Brody-2007
RRM2	p53	0.014736	Co-expression	Spira-Brody-2007
p53	STAT3	0.0227255	Co-expression	Filipits-Gnant-2011
FH	PARP1	0.00805932	Co-expression	Filipits-Gnant-2011
MAP2K1	MAPK1	0.011116	Co-expression	Filipits-Gnant-2011
p53	PARP1	0.0133332	Co-expression	Mills-Haferlach-2009
CDK4	PARP1	0.00583575	Co-expression	Mills-Haferlach-2009
CDK4	p53	0.0123124	Co-expression	Mills-Haferlach-2009
FH	CDK4	0.014216	Co-expression	Mills-Haferlach-2009
BRCA1	WNT1	0.00469103	Co-expression	Bild-Nevins-2006 B
MYC	EGFR	0.0159647	Co-expression	Bild-Nevins-2006 B
RB1	MAPK1	0.0122154	Co-expression	Bild-Nevins-2006 B
RB1	MYC	0.0198507	Co-expression	Bild-Nevins-2006 B
PIK3R3	JAK1	0.0237899	Co-expression	Bild-Nevins-2006 B
RRM2	MAPK1	0.0101923	Co-expression	Bild-Nevins-2006 B
MTOR	WNT1	0.00269879	Co-expression	Bild-Nevins-2006 B
KRAS	MAPK1	0.00921287	Co-expression	Noble-Diehl-2010
EGFR	KRAS	0.00685525	Co-expression	Noble-Diehl-2010
NFKBIZ	MUC1	0.0109547	Co-expression	Noble-Diehl-2010
ARAF	PIK3R1	0.0112459	Co-expression	Noble-Diehl-2010
RAD51	BRCA2	0.0103145	Co-expression	Noble-Diehl-2010
MTOR	RAD51	0.0132092	Co-expression	Noble-Diehl-2010
PIK3CA	JAK1	0.0063141	Co-expression	Holleman-Evans-2004
p53	PARP1	0.00796702	Co-expression	Holleman-Evans-2004
PIK3CD	PARP1	0.0117863	Co-expression	Holleman-Evans-2004
CDK4	BAX	0.00738328	Co-expression	Holleman-Evans-2004
RB1	PARP1	0.0125538	Co-expression	Holleman-Evans-2004
RB1	p53	0.015029	Co-expression	Holleman-Evans-2004
RRM2	RAD51	0.0083932	Co-expression	Holleman-Evans-2004
STAT3	JAK1	0.0191799	Co-localization	Johnson-Shoemaker-2003
BRCA1	BRCA2	0.0203336	Co-localization	Johnson-Shoemaker-2003
p53	WNT1	0.0100351	Co-localization	Johnson-Shoemaker-2003
NFKBIZ	STAT3	0.0194228	Co-localization	Johnson-Shoemaker-2003
PIK3R3	BRAF	0.0171709	Co-localization	Johnson-Shoemaker-2003
TTN	RAF1	0.00902806	Co-localization	Johnson-Shoemaker-2003
EGFR	STAT3	0.0691943	Co-localization	Chen-Huang-2014
p53	BAX	0.0662089	Co-localization	Chen-Huang-2014
p53	MAPK1	0.0264141	Co-localization	Chen-Huang-2014
PIK3R1	EGFR	0.0493123	Co-localization	Chen-Huang-2014
ARAF	BRAF	0.461731	Co-localization	Chen-Huang-2014
CDH1	EGFR	0.138184	Co-localization	Chen-Huang-2014
MAPK3	BRAF	0.130492	Co-localization	Chen-Huang-2014
PIK3R3	EGFR	0.175442	Co-localization	Chen-Huang-2014
PARP1	BRCA2	0.395233	Genetic Interactions	Srivas-Ideker-2016
BRCA1	PARP1	0.816497	Genetic Interactions	Srivas-Ideker-2016
FH	MAPK1	0.272984	Genetic Interactions	Srivas-Ideker-2016
MAP2K1	FH	0.147529	Genetic Interactions	Srivas-Ideker-2016
MTOR	MAPK1	0.197671	Genetic Interactions	Srivas-Ideker-2016
MTOR	MAP2K1	0.106827	Genetic Interactions	Srivas-Ideker-2016
TTN	MAPK1	0.212431	Genetic Interactions	Srivas-Ideker-2016
TTN	MAP2K1	0.114804	Genetic Interactions	Srivas-Ideker-2016
BRAF	BRCA2	0.156858	Genetic Interactions	Shen-Mali-2017
PIK3CA	BRAF	0.168154	Genetic Interactions	Shen-Mali-2017
BRCA1	PARP1	0.171015	Genetic Interactions	Shen-Mali-2017
EGFR	BRAF	0.520936	Genetic Interactions	Shen-Mali-2017
CDK4	BCL2	0.507455	Genetic Interactions	Shen-Mali-2017
HDAC6	BRCA2	0.219156	Genetic Interactions	Shen-Mali-2017
HDAC6	PIK3CA	0.234939	Genetic Interactions	Shen-Mali-2017
CDH1	BRCA1	0.38155	Genetic Interactions	Shen-Mali-2017
RB1	BRCA1	0.208729	Genetic Interactions	Shen-Mali-2017
RRM2	PIK3CA	0.129035	Genetic Interactions	Shen-Mali-2017
RRM2	PARP1	0.20916	Genetic Interactions	Shen-Mali-2017
FGFR2	BRAF	0.275537	Genetic Interactions	Shen-Mali-2017
BRCA2	PARP2	0.29216	Genetic Interactions	BIOGRID-SMALL-SCALE-STUDIES
PARP1	BRCA2	0.29216	Genetic Interactions	BIOGRID-SMALL-SCALE-STUDIES
MAPK1	BRAF	0.325303	Genetic Interactions	BIOGRID-SMALL-SCALE-STUDIES
KRAS	PIK3CA	0.336718	Genetic Interactions	BIOGRID-SMALL-SCALE-STUDIES
KRAS	MAPK1	0.11964	Genetic Interactions	BIOGRID-SMALL-SCALE-STUDIES
EGFR	KRAS	0.217703	Genetic Interactions	BIOGRID-SMALL-SCALE-STUDIES
p53	EGFR	0.135007	Genetic Interactions	BIOGRID-SMALL-SCALE-STUDIES
NFKBIZ	STAT3	1	Genetic Interactions	BIOGRID-SMALL-SCALE-STUDIES
RAD51	BRCA1	0.197096	Genetic Interactions	BIOGRID-SMALL-SCALE-STUDIES
RAF1	KRAS	0.184546	Genetic Interactions	BIOGRID-SMALL-SCALE-STUDIES
MAPK3	BRAF	0.66162	Genetic Interactions	BIOGRID-SMALL-SCALE-STUDIES
MAP2K1	BRAF	0.373002	Genetic Interactions	BIOGRID-SMALL-SCALE-STUDIES
SEPTIN7	BAX	0.55051	Genetic Interactions	BIOGRID-SMALL-SCALE-STUDIES
MTOR	p53	0.0877051	Genetic Interactions	BIOGRID-SMALL-SCALE-STUDIES
p53	EGFR	0.1	Genetic Interactions	Xie-Green-2012
KRAS	JAK1	0.0562544	Genetic Interactions	Luo-Elledge-2009
STAT3	BCL2	0.133857	Genetic Interactions	IREF-SMALL-SCALE-STUDIES
RB1	p53	0.0395168	Genetic Interactions	IREF-SMALL-SCALE-STUDIES
STAT3	MUC1	0.000290249	Genetic Interactions	Lin-Smith-2010
BRAF	MUC1	0.000303411	Genetic Interactions	Lin-Smith-2010
BRAF	PARP2	0.00107594	Genetic Interactions	Lin-Smith-2010
BRAF	STAT3	0.000645698	Genetic Interactions	Lin-Smith-2010
PIK3CA	WNT6	0.00449139	Genetic Interactions	Lin-Smith-2010
PIK3CA	BCL2	0.00129783	Genetic Interactions	Lin-Smith-2010
PARP1	BCL2	0.000871549	Genetic Interactions	Lin-Smith-2010
PARP1	PIK3CA	0.00163784	Genetic Interactions	Lin-Smith-2010
MAPK1	PARP2	0.00114185	Genetic Interactions	Lin-Smith-2010
MAPK1	STAT3	0.000685253	Genetic Interactions	Lin-Smith-2010
MAPK1	BRAF	0.000716328	Genetic Interactions	Lin-Smith-2010
MAPK1	PARP1	0.000914407	Genetic Interactions	Lin-Smith-2010
KRAS	BAX	0.000826232	Genetic Interactions	Lin-Smith-2010
EGFR	BAX	0.000516018	Genetic Interactions	Lin-Smith-2010
EGFR	STAT3	0.000461014	Genetic Interactions	Lin-Smith-2010
EGFR	KRAS	0.00055093	Genetic Interactions	Lin-Smith-2010
MYC	BRCA1	0.0016691	Genetic Interactions	Lin-Smith-2010
NFKBIZ	MUC1	0.000313463	Genetic Interactions	Lin-Smith-2010
NFKBIZ	STAT3	0.00066709	Genetic Interactions	Lin-Smith-2010
PIK3CD	MUC1	0.000225187	Genetic Interactions	Lin-Smith-2010
PIK3CD	BAX	0.000536404	Genetic Interactions	Lin-Smith-2010
PIK3CD	STAT3	0.000479227	Genetic Interactions	Lin-Smith-2010
PIK3CD	KRAS	0.000572695	Genetic Interactions	Lin-Smith-2010
PIK3CD	BRCA1	0.000735914	Genetic Interactions	Lin-Smith-2010
PIK3CD	EGFR	0.000357673	Genetic Interactions	Lin-Smith-2010
PIK3R1	MUC1	0.000188174	Genetic Interactions	Lin-Smith-2010
PIK3R1	STAT3	0.000400458	Genetic Interactions	Lin-Smith-2010
PIK3R1	EGFR	0.000298884	Genetic Interactions	Lin-Smith-2010
PIK3R1	MYC	0.00070467	Genetic Interactions	Lin-Smith-2010
PIK3R1	PIK3CD	0.000310692	Genetic Interactions	Lin-Smith-2010
FH	PIK3R1	0.00053673	Genetic Interactions	Lin-Smith-2010
RAD51	PARP1	0.00398388	Genetic Interactions	Lin-Smith-2010
CDH1	MUC1	0.000244484	Genetic Interactions	Lin-Smith-2010
CDH1	BRAF	0.000543888	Genetic Interactions	Lin-Smith-2010
CDH1	KRAS	0.000621772	Genetic Interactions	Lin-Smith-2010
CDH1	EGFR	0.000388324	Genetic Interactions	Lin-Smith-2010
CDH1	MYC	0.00091554	Genetic Interactions	Lin-Smith-2010
CDH1	FH	0.000697344	Genetic Interactions	Lin-Smith-2010
RB1	MUC1	0.000400234	Genetic Interactions	Lin-Smith-2010
RB1	BCL2	0.000900631	Genetic Interactions	Lin-Smith-2010
RB1	PIK3R1	0.000552205	Genetic Interactions	Lin-Smith-2010
MAPK3	PIK3R1	0.000845734	Genetic Interactions	Lin-Smith-2010
SEPTIN7	MUC1	0.000657776	Genetic Interactions	Lin-Smith-2010
SEPTIN7	BRAF	0.00146331	Genetic Interactions	Lin-Smith-2010
SEPTIN7	PIK3R1	0.000907539	Genetic Interactions	Lin-Smith-2010
PIK3R3	MUC1	0.000322793	Genetic Interactions	Lin-Smith-2010
PIK3R3	BAX	0.000768906	Genetic Interactions	Lin-Smith-2010
RRM2	CDH1	0.00105388	Genetic Interactions	Lin-Smith-2010
FGFR2	STAT	0.000513515	Genetic Interactions	Lin-Smith-2010
FGFR2	MAPK1	0.000401619	Genetic Interactions	Lin-Smith-2010
FGFR2	PIK3R1	0.000234704	Genetic Interactions	Lin-Smith-2010
FGFR2	FH	0.000485211	Genetic Interactions	Lin-Smith-2010
FGFR2	PIK3R3	0.000402611	Genetic Interactions	Lin-Smith-2010
MTOR	STAT3	0.000685827	Genetic Interactions	Lin-Smith-2010
MTOR	PARP1	0.000915172	Genetic Interactions	Lin-Smith-2010
MTOR	EGFR	0.00051187	Genetic Interactions	Lin-Smith-2010
MTOR	SEPTIN7	0.00155425	Genetic Interactions	Lin-Smith-2010
TTN	BRCA2	0.00170675	Genetic Interactions	Lin-Smith-2010
TTN	KRAS	0.00100224	Genetic Interactions	Lin-Smith-2010
TTN	MYC	0.00147576	Genetic Interactions	Lin-Smith-2010
TTN	FGFR2	0.000491531	Genetic Interactions	Lin-Smith-2010
BRCA1	BRCA2	0.0445647	Pathway	REACTOME
EGFR	PIK3CA	0.117552	Pathway	REACTOME
CDK4	BRCA2	0.0389538	Pathway	REACTOME
CDK4	BRCA1	0.0340143	Pathway	REACTOME
RAD51	CDK4	0.0492409	Pathway	REACTOME
RB1	CDK4	0.137849	Pathway	REACTOME
MAP2K1	RAF1	0.299855	Pathway	REACTOME
MAP2K1	MAPK3	0.530263	Pathway	REACTOME
EGFR	MAPK1	0.165356	Pathway	CELL_MAP
MAP2K1	EGFR	0.125417	Pathway	CELL_MAP
PIK3R3	PIK3CA	0.201276	Pathway	CELL_MAP
BAX	BCL2	0.102672	Pathway	IMID
BCL2	JAK1	0.00642699	Pathway	Wu-Stein-2010
BAX	BCL2	0.0317577	Pathway	Wu-Stein-2010
STAT3	MUC1	0.0324665	Pathway	Wu-Stein-2010
STAT3	JAK1	0.00264092	Pathway	Wu-Stein-2010
PIK3CA	JAK1	0.00205362	Pathway	Wu-Stein-2010
PIK3CA	STAT3	0.00166141	Pathway	Wu-Stein-2010
MAPK1	JAK1	0.0024353	Pathway	Wu-Stein-2010
MAPK1	BCL2	0.00479469	Pathway	Wu-Stein-2010
MAPK1	STAT3	0.00197019	Pathway	Wu-Stein-2010
MAPK1	PIK3CA	0.00153205	Pathway	Wu-Stein-2010
KRAS	JAK1	0.00550374	Pathway	Wu-Stein-2010
KRAS	BRAF	0.0164234	Pathway	Wu-Stein-2010
KRAS	PIK3CA	0.00346241	Pathway	Wu-Stein-2010
BRCA1	BCL2	0.0132124	Pathway	Wu-Stein-2010
BRCA1	STAT3	0.00542911	Pathway	Wu-Stein-2010
EGFR	JAK1	0.00232847	Pathway	Wu-Stein-2010
EGFR	STAT3	0.00188376	Pathway	Wu-Stein-2010
EGFR	PIK3CA	0.00146484	Pathway	Wu-Stein-2010
EGFR	MAPK1	0.00173709	Pathway	Wu-Stein-2010
EGFR	KRAS	0.0039258	Pathway	Wu-Stein-2010
p53	BCL2	0.00331165	Pathway	Wu-Stein-2010
p53	BAX	0.00831147	Pathway	Wu-Stein-2010
p53	STAT3	0.00136079	Pathway	Wu-Stein-2010
p53	BRCA1	0.00345788	Pathway	Wu-Stein-2010
p53	EGFR	0.0011998	Pathway	Wu-Stein-2010
MYC	STAT3	0.00296292	Pathway	Wu-Stein-2010
MYC	PIK3CA	0.00230402	Pathway	Wu-Stein-2010
MYC	MAPK1	0.00273224	Pathway	Wu-Stein-2010
MYC	EGFR	0.00261238	Pathway	Wu-Stein-2010
MYC	p53	0.00188713	Pathway	Wu-Stein-2010
PIK3CD	JAK1	0.00392963	Pathway	Wu-Stein-2010
PIK3CD	STAT3	0.00317912	Pathway	Wu-Stein-2010
PIK3CD	PIK3CA	0.00247214	Pathway	Wu-Stein-2010
PIK3CD	KRAS	0.00662537	Pathway	Wu-Stein-2010
PIK3CD	EGFR	0.002803	Pathway	Wu-Stein-2010
CDK4	MAPK1	0.0066973	Pathway	Wu-Stein-2010
CDK4	MYC	0.0100719	Pathway	Wu-Stein-2010
PIK3R1	JAK1	0.00220264	Pathway	Wu-Stein-2010
PIK3R1	STAT3	0.00178196	Pathway	Wu-Stein-2010
PIK3R1	PIK3CA	0.00138569	Pathway	Wu-Stein-2010
PIK3R1	MAPK1	0.00164322	Pathway	Wu-Stein-2010
PIK3R1	KRAS	0.00371366	Pathway	Wu-Stein-2010
PIK3R1	EGFR	0.00157114	Pathway	Wu-Stein-2010
PIK3R1	MYC	0.00247121	Pathway	Wu-Stein-2010
PIK3R1	PIK3CD	0.00265153	Pathway	Wu-Stein-2010
ARAF	BRAF	0.060379	Pathway	Wu-Stein-2010
ARAF	KRAS	0.0341144	Pathway	Wu-Stein-2010
RAD51	JAK1	0.0248303	Pathway	Wu-Stein-2010
RAD51	BRCA2	0.219693	Pathway	Wu-Stein-2010
RAD51	BRCA1	0.0510453	Pathway	Wu-Stein-2010
CDH1	MAPK1	0.00247434	Pathway	Wu-Stein-2010
RB1	MAPK1	0.0031232	Pathway	Wu-Stein-2010
RB1	p53	0.00215717	Pathway	Wu-Stein-2010
RB1	CDK4	0.0115131	Pathway	Wu-Stein-2010
RAF1	JAK1	0.00487731	Pathway	Wu-Stein-2010
RAF1	BRAF	0.0145541	Pathway	Wu-Stein-2010
RAF1	PIK3CA	0.00306832	Pathway	Wu-Stein-2010
RAF1	MAPK1	0.00363859	Pathway	Wu-Stein-2010
RAF1	KRAS	0.00822315	Pathway	Wu-Stein-2010
RAF1	EGFR	0.00347897	Pathway	Wu-Stein-2010
RAF1	PIK3R1	0.00329097	Pathway	Wu-Stein-2010
RAF1	ARAF	0.0302315	Pathway	Wu-Stein-2010
RAF1	RB1	0.006255	Pathway	Wu-Stein-2010
MAPK3	JAK1	0.00228336	Pathway	Wu-Stein-2010
MAPK3	BCL2	0.00449555	Pathway	Wu-Stein-2010
MAPK3	STAT3	0.00184727	Pathway	Wu-Stein-2010
MAPK3	PIK3CA	0.00143647	Pathway	Wu-Stein-2010
MAPK3	MAPK1	0.00170344	Pathway	Wu-Stein-2010
MAPK3	BRCA1	0.00469406	Pathway	Wu-Stein-2010
MAPK3	p53	0.00117655	Pathway	Wu-Stein-2010
MAPK3	MYC	0.00256177	Pathway	Wu-Stein-2010
MAPK3	PIK3R1	0.0015407	Pathway	Wu-Stein-2010
MAPK3	CDH1	0.00231997	Pathway	Wu-Stein-2010
MAPK3	RB1	0.00292835	Pathway	Wu-Stein-2010
MAPK3	RAF1	0.00341158	Pathway	Wu-Stein-2010
MAP2K1	JAK1	0.00555855	Pathway	Wu-Stein-2010
MAP2K1	STAT3	0.00449693	Pathway	Wu-Stein-2010
MAP2K1	BRAF	0.016587	Pathway	Wu-Stein-2010
MAP2K1	PIK3CA	0.00349689	Pathway	Wu-Stein-2010
MAP2K1	MAPK1	0.00414681	Pathway	Wu-Stein-2010
MAP2K1	KRAS	0.00937172	Pathway	Wu-Stein-2010
MAP2K1	EGFR	0.0039649	Pathway	Wu-Stein-2010
MAP2K1	PIK3CD	0.00669135	Pathway	Wu-Stein-2010
MAP2K1	PIK3R1	0.00375064	Pathway	Wu-Stein-2010
MAP2K1	ARAF	0.0344542	Pathway	Wu-Stein-2010
MAP2K1	RAF1	0.00830504	Pathway	Wu-Stein-2010
MAP2K1	MAPK3	0.00388809	Pathway	Wu-Stein-2010
PIK3R3	JAK1	0.00469421	Pathway	Wu-Stein-2010
PIK3R3	PIK3CA	0.00295313	Pathway	Wu-Stein-2010
PIK3R3	EGFR	0.00334837	Pathway	Wu-Stein-2010
PIK3R3	PIK3CD	0.00565086	Pathway	Wu-Stein-2010
PIK3R3	PIK3R1	0.00316742	Pathway	Wu-Stein-2010
RRM2	p53	0.0166948	Pathway	Wu-Stein-2010
FGFR2	PIK3CA	0.00369702	Pathway	Wu-Stein-2010
FGFR2	KRAS	0.00990805	Pathway	Wu-Stein-2010
FGFR2	PIK3CD	0.00707428	Pathway	Wu-Stein-2010
FGFR2	PIK3R1	0.00396528	Pathway	Wu-Stein-2010
FGFR2	PIK3R3	0.0084507	Pathway	Wu-Stein-2010
MTOR	STAT3	0.00447845	Pathway	Wu-Stein-2010
MTOR	PIK3CA	0.00348252	Pathway	Wu-Stein-2010
MTOR	EGFR	0.00394861	Pathway	Wu-Stein-2010
MTOR	PIK3CD	0.00666385	Pathway	Wu-Stein-2010
MTOR	PIK3R1	0.00373523	Pathway	Wu-Stein-2010
MTOR	MAPK3	0.00387212	Pathway	Wu-Stein-2010
MTOR	PIK3R3	0.00796041	Pathway	Wu-Stein-2010
KRAS	BRAF	0.1963	Physical Interactions	Li-Fu-2017
EGFR	PIK3CA	0.478322	Physical Interactions	Li-Fu-2017
MYC	PIK3CA	0.0434453	Physical Interactions	Li-Fu-2017
MYC	p53	0.0221988	Physical Interactions	Li-Fu-2017
CDK4	p53	0.0315627	Physical Interactions	Li-Fu-2017
CDK4	MYC	0.0156874	Physical Interactions	Li-Fu-2017
PIK3R1	PIK3CA	0.477535	Physical Interactions	Li-Fu-2017
ARAF	BRAF	0.0484311	Physical Interactions	Li-Fu-2017
ARAF	PIK3CA	0.0763953	Physical Interactions	Li-Fu-2017
ARAF	KRAS	0.138276	Physical Interactions	Li-Fu-2017
ARAF	p53	0.0390349	Physical Interactions	Li-Fu-2017
ARAF	MYC	0.0194012	Physical Interactions	Li-Fu-2017
ARAF	CDK4	0.027585	Physical Interactions	Li-Fu-2017
RB1	MYC	0.279315	Physical Interactions	Li-Fu-2017
RAF1	KRAS	0.104828	Physical Interactions	Li-Fu-2017
RAF1	MYC	0.0147082	Physical Interactions	Li-Fu-2017
RAF1	CDK4	0.0209124	Physical Interactions	Li-Fu-2017
EGFR	MUC1	0.0909091	Physical Interactions	Kotlyar-Jurisica-2015
EGFR	STAT3	0.0909091	Physical Interactions	Kotlyar-Jurisica-2015
HDAC6	EGFR	0.0909091	Physical Interactions	Kotlyar-Jurisica-2015
CDH1	EGFR	0.0909091	Physical Interactions	Kotlyar-Jurisica-2015
RAF1	EGFR	0.0909091	Physical Interactions	Kotlyar-Jurisica-2015
PIK3R3	EGFR	0.0909091	Physical Interactions	Kotlyar-Jurisica-2015
p53	MAPK1	0.0922897	Physical Interactions	Fogeron-Lange-2013
BRCA1	JAK1	0.0681941	Physical Interactions	Lim-Zoghbi-2006
BRCA1	BRCA2	0.0956541	Physical Interactions	Lim-Zoghbi-2006
BRCA1	STAT3	0.0152058	Physical Interactions	Lim-Zoghbi-2006
p53	BRCA2	0.0528579	Physical Interactions	Lim-Zoghbi-2006
p53	PARP1	0.0127367	Physical Interactions	Lim-Zoghbi-2006
p53	BRCA1	0.00139094	Physical Interactions	Lim-Zoghbi-2006
MYC	BRCA1	0.0424802	Physical Interactions	Lim-Zoghbi-2006
CDK4	BRCA1	0.0845291	Physical Interactions	Lim-Zoghbi-2006
PIK3R1	EGFR	0.0468884	Physical Interactions	Lim-Zoghbi-2006
RAD51	BRCA1	0.0389858	Physical Interactions	Lim-Zoghbi-2006
RB1	BRCA1	0.0211036	Physical Interactions	Lim-Zoghbi-2006
MAPK3	p53	0.0482599	Physical Interactions	Lim-Zoghbi-2006
RRM2	p53	0.0986024	Physical Interactions	Lim-Zoghbi-2006
MYC	BCL2	0.0397151	Physical Interactions	Zeller-Wei-2006
MYC	STAT3	0.0397151	Physical Interactions	Zeller-Wei-2006
MYC	MAPK1	0.0397151	Physical Interactions	Zeller-Wei-2006
MYC	p53	0.09759	Physical Interactions	Agrawal-Sedivy-2010
BAX	BCL2	0.387079	Physical Interactions	IREF-mppi
RAD51	BRCA2	0.315907	Physical Interactions	IREF-mppi
EGFR	STAT3	0.0747435	Physical Interactions	Foerster-Ritter-2013
MTOR	EGFR	0.0747435	Physical Interactions	Foerster-Ritter-2013
MAPK1	BCL2	0.118518	Physical Interactions	IREF-matrixdb
MAPK1	PARP1	0.0496361	Physical Interactions	IREF-matrixdb
EGFR	MUC1	0.00729764	Physical Interactions	IREF-matrixdb
EGFR	STAT3	0.00491771	Physical Interactions	IREF-matrixdb
p53	MAPK1	0.00959407	Physical Interactions	IREF-matrixdb
HDAC6	EGFR	0.00902002	Physical Interactions	IREF-matrixdb
PIK3R1	EGFR	0.0029629	Physical Interactions	IREF-matrixdb
CDH1	EGFR	0.00136903	Physical Interactions	IREF-matrixdb
RAF1	EGFR	0.00864603	Physical Interactions	IREF-matrixdb
MAPK3	MAPK1	0.0295708	Physical Interactions	IREF-matrixdb
MAP2K1	MAPK1	0.0483796	Physical Interactions	IREF-matrixdb
MAP2K1	CDH1	0.0578977	Physical Interactions	IREF-matrixdb
PIK3R3	EGFR	0.00562251	Physical Interactions	IREF-matrixdb
EGFR	PARP1	0.0566139	Physical Interactions	Yao-Stagljar-2017 A
TTN	EGFR	0.0566139	Physical Interactions	Yao-Stagljar-2017 A
KRAS	BRAF	0.116008	Physical Interactions	Kennedy-Kolch-2020 A
ARAF	BRAF	0.0116707	Physical Interactions	Kennedy-Kolch-2020 A
RAF1	BRAF	0.00587285	Physical Interactions	Kennedy-Kolch-2020 A
RAF1	KRAS	0.0739499	Physical Interactions	Kennedy-Kolch-2020 A
RAF1	ARAF	0.0074396	Physical Interactions	Kennedy-Kolch-2020 A
MAPK3	MAPK1	0.0142398	Physical Interactions	Kennedy-Kolch-2020 A
MAP2K1	BRAF	0.00587316	Physical Interactions	Kennedy-Kolch-2020 A
MAP2K1	KRAS	0.0739538	Physical Interactions	Kennedy-Kolch-2020 A
MAP2K1	ARAF	0.00743999	Physical Interactions	Kennedy-Kolch-2020 A
MAP2K1	RAF1	0.00374389	Physical Interactions	Kennedy-Kolch-2020 A
BAX	BCL2	0.0379201	Physical Interactions	IREF-bind-translation
EGFR	STAT3	0.0310161	Physical Interactions	IREF-bind-translation
p53	MUC1	0.174421	Physical Interactions	IREF-bind-translation
p53	BRCA1	0.00552596	Physical Interactions	IREF-bind-translation
MYC	BRCA1	0.0131821	Physical Interactions	IREF-bind-translation
CDK4	BRCA1	0.0227856	Physical Interactions	IREF-bind-translation
PIK3R1	EGFR	0.031068	Physical Interactions	IREF-bind-translation
RAD51	BRCA1	0.035086	Physical Interactions	IREF-bind-translation
CDH1	EGFR	0.0726096	Physical Interactions	IREF-bind-translation
RB1	MAPK1	0.0134767	Physical Interactions	IREF-bind-translation
RB1	BRCA1	0.00576244	Physical Interactions	IREF-bind-translation
RB1	CDK4	0.0161018	Physical Interactions	IREF-bind-translation
RB1	PIK3R1	0.014582	Physical Interactions	IREF-bind-translation
RAF1	BRAF	0.0470039	Physical Interactions	IREF-bind-translation
RAF1	MAPK1	0.0214434	Physical Interactions	IREF-bind-translation
RAF1	RB1	0.00647938	Physical Interactions	IREF-bind-translation
MAPK3	MYC	0.0238124	Physical Interactions	IREF-bind-translation
MAP2K1	BRAF	0.152922	Physical Interactions	IREF-bind-translation
MAP2K1	MAPK1	0.0697639	Physical Interactions	IREF-bind-translation
MAP2K1	ARAF	0.0505088	Physical Interactions	IREF-bind-translation
MAP2K1	RAF1	0.0335415	Physical Interactions	IREF-bind-translation
MAP2K1	MAPK3	0.0538856	Physical Interactions	IREF-bind-translation
PIK3R3	RB1	0.0591109	Physical Interactions	IREF-bind-translation
MAPK1	BCL2	0.0307804	Physical Interactions	IREF-mint
BRCA1	JAK1	0.0864838	Physical Interactions	IREF-mint
EGFR	MUC1	0.0602303	Physical Interactions	IREF-mint
EGFR	STAT3	0.0115677	Physical Interactions	IREF-mint
p53	PARP1	0.00644226	Physical Interactions	IREF-mint
p53	BRCA1	0.01134	Physical Interactions	IREF-mint
PIK3R1	PIK3CA	0.0173727	Physical Interactions	IREF-mint
PIK3R1	EGFR	0.0037637	Physical Interactions	IREF-mint
ARAF	PIK3R1	0.0931909	Physical Interactions	IREF-mint
RAD51	BRCA2	0.042809	Physical Interactions	IREF-mint
RAF1	BRAF	0.0315686	Physical Interactions	IREF-mint
MAP2K1	BAX	0.0390686	Physical Interactions	IREF-mint
MAP2K1	PIK3CA	0.0389364	Physical Interactions	IREF-mint
MAP2K1	MAPK1	0.0268145	Physical Interactions	IREF-mint
MAP2K1	CDH1	0.0256846	Physical Interactions	IREF-mint
MAP2K1	RAF1	0.0275615	Physical Interactions	IREF-mint
MAP2K1	MAPK3	0.0253754	Physical Interactions	IREF-mint
PIK3R3	EGFR	0.00957141	Physical Interactions	IREF-mint
MTOR	p53	0.0110662	Physical Interactions	IREF-mint
BAX	BCL2	0.0276541	Physical Interactions	IREF-quickgo
BRCA1	BRCA2	0.0330832	Physical Interactions	IREF-quickgo
p53	MUC1	0.159829	Physical Interactions	IREF-quickgo
p53	BCL2	0.00599616	Physical Interactions	IREF-quickgo
RAD51	BRCA2	0.0246593	Physical Interactions	IREF-quickgo
RAD51	BRCA1	0.0205079	Physical Interactions	IREF-quickgo
RAD51	p53	0.00652729	Physical Interactions	IREF-quickgo
MAP2K1	BRAF	0.208735	Physical Interactions	IREF-quickgo
MAPK1	BCL2	0.0381354	Physical Interactions	IREF-innatedb
EGFR	MUC1	0.0599878	Physical Interactions	IREF-innatedb
EGFR	JAK1	0.0224581	Physical Interactions	IREF-innatedb
MYC	MAPK1	0.0367403	Physical Interactions	IREF-innatedb
CDH1	EGFR	0.0289274	Physical Interactions	IREF-innatedb
MAPK3	MYC	0.0596827	Physical Interactions	IREF-innatedb
MAP2K1	BRAF	0.472679	Physical Interactions	IREF-innatedb
MAP2K1	MAPK3	0.0657008	Physical Interactions	IREF-innatedb
MYC	PARP1	0.0272468	Physical Interactions	Heidelberger-Beli-2018
MYC	MAPK1	0.0272468	Physical Interactions	Heidelberger-Beli-2018
HDAC6	MYC	0.0272468	Physical Interactions	Heidelberger-Beli-2018
RB1	MYC	0.0272468	Physical Interactions	Heidelberger-Beli-2018
RRM2	MYC	0.0272468	Physical Interactions	Heidelberger-Beli-2018
BAX	BCL2	0.0721276	Physical Interactions	IREF-dip
MAPK1	PARP1	0.0729947	Physical Interactions	IREF-dip
BRCA1	BRCA2	0.0420709	Physical Interactions	IREF-dip
p53	BRCA2	0.0225748	Physical Interactions	IREF-dip
p53	PARP1	0.0125104	Physical Interactions	IREF-dip
p53	BRCA1	0.00769885	Physical Interactions	IREF-dip
MYC	BRCA1	0.0164182	Physical Interactions	IREF-dip
PIK3R1	PIK3CA	0.0999163	Physical Interactions	IREF-dip
ARAF	BRAF	0.31249	Physical Interactions	IREF-dip
RAD51	BRCA2	0.0693139	Physical Interactions	IREF-dip
RAF1	BRAF	0.0603747	Physical Interactions	IREF-dip
RAF1	KRAS	0.142997	Physical Interactions	IREF-dip
RAF1	ARAF	0.122716	Physical Interactions	IREF-dip
MAPK3	PARP1	0.178094	Physical Interactions	IREF-dip
MAP2K1	BRAF	0.185741	Physical Interactions	IREF-dip
MAP2K1	RAF1	0.0729415	Physical Interactions	IREF-dip
RRM2	p53	0.0464201	Physical Interactions	IREF-dip
KRAS	BRAF	0.414214	Predicted	I2D-Formstecher-Daviet-2005-Head-Fly2Human
PIK3CD	KRAS	0.643594	Predicted	I2D-Formstecher-Daviet-2005-Head-Fly2Human
WNT1	WNT6	0.126617	Predicted	I2D-BioGRID-Fly2Human
BRAF	WNT1	0.0310203	Predicted	I2D-BioGRID-Fly2Human
MAPK1	BRAF	0.0486153	Predicted	I2D-BioGRID-Fly2Human
KRAS	WNT1	0.0119949	Predicted	I2D-BioGRID-Fly2Human
KRAS	BRAF	0.0182437	Predicted	I2D-BioGRID-Fly2Human
KRAS	MAPK1	0.0187986	Predicted	I2D-BioGRID-Fly2Human
PIK3CD	KRAS	0.0367404	Predicted	I2D-BioGRID-Fly2Human
MAP2K1	BRAF	0.06478	Predicted	I2D-BioGRID-Fly2Human
MAP2K1	MAPK1	0.0667501	Predicted	I2D-BioGRID-Fly2Human
MAP2K1	KRAS	0.0250491	Predicted	I2D-BioGRID-Fly2Human
SEPTIN7	KRAS	0.0351442	Predicted	I2D-BioGRID-Fly2Human
FGFR2	KRAS	0.0955353	Predicted	I2D-BioGRID-Fly2Human
MTOR	PIK3CD	0.19931	Predicted	I2D-BioGRID-Fly2Human
WNT7B	WNT6	0.790412	Predicted	I2D-BioGRID-Fly2Human
BAX	BCL2	0.796225	Predicted	I2D-MGI-Mouse2Human
RAD51	BRCA2	1	Predicted	I2D-MGI-Mouse2Human
RAF1	MAPK1	0.476741	Predicted	I2D-MGI-Mouse2Human
MAPK3	RAF1	0.476741	Predicted	I2D-MGI-Mouse2Human
PIK3R3	PIK3CA	1	Predicted	I2D-MGI-Mouse2Human
RRM2	CDH1	0.551783	Predicted	I2D-MGI-Mouse2Human
KRAS	BRAF	0.318518	Predicted	I2D-Formstecher-Daviet-2005-Embryo-Fly2Human
PIK3CD	KRAS	0.709666	Predicted	I2D-Formstecher-Daviet-2005-Embryo-Fly2Human
BAX	BCL2	0.707107	Predicted	I2D-MINT-Mouse2Human
PIK3R1	PIK3CA	0.0519644	Predicted	I2D-MINT-Mouse2Human
ARAF	KRAS	0.335574	Predicted	I2D-MINT-Mouse2Human
RAF1	KRAS	0.317025	Predicted	I2D-MINT-Mouse2Human
MAP2K1	BRAF	0.59928	Predicted	I2D-MINT-Mouse2Human
PIK3R3	PIK3CA	0.52343	Predicted	I2D-MINT-Mouse2Human
MAPK1	STAT3	0.180044	Predicted	I2D-BIND-Rat2Human
MAP2K1	MAPK1	0.378273	Predicted	I2D-BIND-Rat2Human
PARP1	PARP2	0.121717	Predicted	Wu-Stein-2010
MAPK1	BRAF	0.0175263	Predicted	Wu-Stein-2010
KRAS	BCL2	0.0353077	Predicted	Wu-Stein-2010
BRCA1	JAK1	0.0157058	Predicted	Wu-Stein-2010
BRCA1	BRCA2	0.0132757	Predicted	Wu-Stein-2010
BRCA1	PARP1	0.0106056	Predicted	Wu-Stein-2010
EGFR	MUC1	0.053365	Predicted	Wu-Stein-2010
p53	BRCA2	0.00781978	Predicted	Wu-Stein-2010
p53	PARP1	0.00624699	Predicted	Wu-Stein-2010
p53	MAPK1	0.00233638	Predicted	Wu-Stein-2010
MYC	BCL2	0.013177	Predicted	Wu-Stein-2010
MYC	BRCA1	0.00836044	Predicted	Wu-Stein-2010
PIK3R1	BRCA1	0.00505708	Predicted	Wu-Stein-2010
ARAF	PIK3R1	0.0187282	Predicted	Wu-Stein-2010
RAD51	p53	0.00546973	Predicted	Wu-Stein-2010
CDH1	EGFR	0.0235514	Predicted	Wu-Stein-2010
RB1	BRCA1	0.00514079	Predicted	Wu-Stein-2010
RB1	MYC	0.00845964	Predicted	Wu-Stein-2010
RB1	PIK3R1	0.00511708	Predicted	Wu-Stein-2010
RAF1	BCL2	0.0110577	Predicted	Wu-Stein-2010
RAF1	MYC	0.0115452	Predicted	Wu-Stein-2010
MAPK3	BRAF	0.0235248	Predicted	Wu-Stein-2010
MAPK3	CDK4	0.00481214	Predicted	Wu-Stein-2010
MAP2K1	MYC	0.0166205	Predicted	Wu-Stein-2010
STAT3	BCL2	0.0100055	Predicted	I2D-INNATEDB-Mouse2Human
p53	BAX	0.15436	Predicted	I2D-INNATEDB-Mouse2Human
p53	STAT3	0.0101545	Predicted	I2D-INNATEDB-Mouse2Human
MYC	STAT3	0.00601444	Predicted	I2D-INNATEDB-Mouse2Human
PIK3R1	PIK3CA	0.159386	Predicted	I2D-INNATEDB-Mouse2Human
PIK3R1	PIK3CD	0.0604771	Predicted	I2D-INNATEDB-Mouse2Human
ARAF	PIK3R1	0.264708	Predicted	I2D-INNATEDB-Mouse2Human
MAPK3	STAT3	0.0167291	Predicted	I2D-INNATEDB-Mouse2Human
BAX	BCL2	0.160134	Predicted	I2D-IntAct-Mouse2Human
KRAS	PIK3CA	0.0994514	Predicted	I2D-IntAct-Mouse2Human
EGFR	KRAS	0.139949	Predicted	I2D-IntAct-Mouse2Human
PIK3CD	KRAS	0.159374	Predicted	I2D-IntAct-Mouse2Human
PIK3R1	PIK3CA	0.0269327	Predicted	I2D-IntAct-Mouse2Human
PIK3R1	PIK3CD	0.0431605	Predicted	I2D-IntAct-Mouse2Human
RAF1	BRAF	0.226048	Predicted	I2D-IntAct-Mouse2Human
MAP2K1	BRAF	0.30029	Predicted	I2D-IntAct-Mouse2Human
PIK3R3	PIK3CA	0.224742	Predicted	I2D-IntAct-Mouse2Human
KRAS	BRAF	0.32539	Predicted	I2D-MINT-Fly2Human
PIK3CD	KRAS	0.66162	Predicted	I2D-MINT-Fly2Human
MAP2K1	MAPK1	0.64382	Predicted	I2D-MINT-Fly2Human
WNT1	WNT6	0.0573214	Shared protein domains	INTERPRO
BAX	BCL2	0.0845859	Shared protein domains	INTERPRO
PIK3CA	BRAF	0.00574787	Shared protein domains	INTERPRO
PARP1	PARP2	0.152838	Shared protein domains	INTERPRO
BRCA1	PARP1	0.0158794	Shared protein domains	INTERPRO
EGFR	JAK1	0.0059936	Shared protein domains	INTERPRO
p53	STAT3	0.0112686	Shared protein domains	INTERPRO
PIK3CD	BRAF	0.00574787	Shared protein domains	INTERPRO
PIK3CD	PIK3CA	0.0916941	Shared protein domains	INTERPRO
CDK4	MAPK1	0.00586885	Shared protein domains	INTERPRO
ARAF	BRAF	0.0364888	Shared protein domains	INTERPRO
ARAF	PIK3CA	0.0057153	Shared protein domains	INTERPRO
ARAF	PIK3CD	0.0057153	Shared protein domains	INTERPRO
RAF1	BRAF	0.0361601	Shared protein domains	INTERPRO
RAF1	PIK3CA	0.00566383	Shared protein domains	INTERPRO
RAF1	PIK3CD	0.00566383	Shared protein domains	INTERPRO
RAF1	ARAF	0.0359553	Shared protein domains	INTERPRO
MAPK3	MAPK1	0.0296067	Shared protein domains	INTERPRO
MAPK3	CDK4	0.00579666	Shared protein domains	INTERPRO
MAP2K1	MAPK1	0.00586885	Shared protein domains	INTERPRO
MAP2K1	CDK4	0.00381781	Shared protein domains	INTERPRO
MAP2K1	MAPK3	0.00579666	Shared protein domains	INTERPRO
PIK3R3	STAT3	0.012676	Shared protein domains	INTERPRO
PIK3R3	PIK3R1	0.0361906	Shared protein domains	INTERPRO
FGFR2	JAK1	0.00932781	Shared protein domains	INTERPRO
FGFR2	EGFR	0.0099616	Shared protein domains	INTERPRO
MTOR	PIK3CA	0.0262815	Shared protein domains	INTERPRO
MTOR	PIK3CD	0.0262815	Shared protein domains	INTERPRO
WNT7B	WNT6	0.0551906	Shared protein domains	INTERPRO
WNT7B	WNT1	0.0551906	Shared protein domains	INTERPRO
TTN	FGFR2	0.0144063	Shared protein domains	INTERPRO
WNT1	WNT6	0.0555556	Shared protein domains	PFAM
BAX	BCL2	0.0896665	Shared protein domains	PFAM
BRAF	JAK1	0.00835643	Shared protein domains	PFAM
PARP1	PARP2	0.13543	Shared protein domains	PFAM
BRCA1	PARP1	0.0146983	Shared protein domains	PFAM
EGFR	JAK1	0.00895479	Shared protein domains	PFAM
EGFR	BRAF	0.00777631	Shared protein domains	PFAM
PIK3CD	PIK3CA	0.126725	Shared protein domains	PFAM
CDK4	MAPK1	0.00328803	Shared protein domains	PFAM
PIK3R1	STAT3	0.00977011	Shared protein domains	PFAM
ARAF	JAK1	0.00835648	Shared protein domains	PFAM
ARAF	BRAF	0.0373565	Shared protein domains	PFAM
ARAF	EGFR	0.00777635	Shared protein domains	PFAM
RAF1	JAK1	0.00834687	Shared protein domains	PFAM
RAF1	BRAF	0.0373135	Shared protein domains	PFAM
RAF1	EGFR	0.00776741	Shared protein domains	PFAM
RAF1	ARAF	0.0373138	Shared protein domains	PFAM
MAPK3	MAPK1	0.00284826	Shared protein domains	PFAM
MAPK3	CDK4	0.00284826	Shared protein domains	PFAM
MAP2K1	MAPK1	0.00328803	Shared protein domains	PFAM
MAP2K1	CDK4	0.00328803	Shared protein domains	PFAM
MAP2K1	MAPK3	0.00284826	Shared protein domains	PFAM
PIK3R3	STAT3	0.0131273	Shared protein domains	PFAM
PIK3R3	PIK3R1	0.0476924	Shared protein domains	PFAM
MTOR	PIK3CA	0.0261604	Shared protein domains	PFAM
MTOR	PIK3CD	0.0261604	Shared protein domains	PFAM
WNT7B	WNT6	0.0555556	Shared protein domains	PFAM
WNT7B	WNT1	0.0555556	Shared protein domains	PFAM

## Sheet: grp 3-4
Gene 1	Gene 2	Weight	Network group	Network
IL4	IL2	0.0256491	Co-expression	Iqbal-Chan-2010
IL5	IL2	0.019379	Co-expression	Iqbal-Chan-2010
IL5	IL4	0.0118387	Co-expression	Iqbal-Chan-2010
CXCR2	IL12B	0.0143134	Co-expression	Iqbal-Chan-2010
IFNG	IL10	0.0149394	Co-expression	Iqbal-Chan-2010
IL13	IL5	0.0142838	Co-expression	Iqbal-Chan-2010
IL13	IL8	0.0241272	Co-expression	Iqbal-Chan-2010
IL1B	IL8	0.0246651	Co-expression	Iqbal-Chan-2010
IL6	IL8	0.0166254	Co-expression	Iqbal-Chan-2010
IL6	IL1B	0.0203452	Co-expression	Iqbal-Chan-2010
TNF	IL4	0.014983	Co-expression	Iqbal-Chan-2010
TNF	IFNG	0.0149542	Co-expression	Iqbal-Chan-2010
NFKB1	IFNG	0.00523719	Co-expression	Iqbal-Chan-2010
NFKB1	TNF	0.00500072	Co-expression	Iqbal-Chan-2010
p53	TNF	0.0175607	Co-expression	Iqbal-Chan-2010
IL9	IL13	0.0212343	Co-expression	Iqbal-Chan-2010
IL10RA	IFNG	0.00550848	Co-expression	Iqbal-Chan-2010
CXCL3	IL6	0.0117409	Co-expression	Iqbal-Chan-2010
CCL4	IFNG	0.0110585	Co-expression	Iqbal-Chan-2010
CCL4	TNF	0.00857396	Co-expression	Iqbal-Chan-2010
CCL4	IL10RA	0.00539461	Co-expression	Iqbal-Chan-2010
CXCL1	IL8	0.024852	Co-expression	Iqbal-Chan-2010
CXCL1	IL1B	0.0253035	Co-expression	Iqbal-Chan-2010
CXCL1	IL6	0.0227256	Co-expression	Iqbal-Chan-2010
CXCL1	CXCL3	0.0156746	Co-expression	Iqbal-Chan-2010
CXCL2	CXCL3	0.0191543	Co-expression	Iqbal-Chan-2010
CCL20	NFKB1	0.00671702	Co-expression	Iqbal-Chan-2010
PTGS2	IL6	0.0218425	Co-expression	Iqbal-Chan-2010
PTGS2	CXCL3	0.020234	Co-expression	Iqbal-Chan-2010
HCAR3	CXCR2	0.0234678	Co-expression	Iqbal-Chan-2010
HCAR3	IL8	0.0193411	Co-expression	Iqbal-Chan-2010
HCAR3	IL1B	0.0241655	Co-expression	Iqbal-Chan-2010
HCAR3	CXCL1	0.0252492	Co-expression	Iqbal-Chan-2010
IL23A	IL5	0.0111922	Co-expression	Iqbal-Chan-2010
IL23A	IFNG	0.00996273	Co-expression	Iqbal-Chan-2010
IL23A	TNF	0.0153122	Co-expression	Iqbal-Chan-2010
OSM	IL9	0.0250092	Co-expression	Iqbal-Chan-2010
FPR1	IL1B	0.0204027	Co-expression	Iqbal-Chan-2010
IL10	IL17	0.0161577	Co-expression	Wang-McClelland-2010 A
IFNG	IL10	0.0148251	Co-expression	Wang-McClelland-2010 A
IL8	IL10	0.00926671	Co-expression	Wang-McClelland-2010 A
IL8	IFNG	0.0111536	Co-expression	Wang-McClelland-2010 A
IL13	IL5	0.0117248	Co-expression	Wang-McClelland-2010 A
IL1B	IFNG	0.0134743	Co-expression	Wang-McClelland-2010 A
IL1B	IL8	0.00927643	Co-expression	Wang-McClelland-2010 A
IL6	IL10	0.00517316	Co-expression	Wang-McClelland-2010 A
IL6	IFNG	0.00640794	Co-expression	Wang-McClelland-2010 A
IL6	IL8	0.00472046	Co-expression	Wang-McClelland-2010 A
IL6	IL1B	0.00545832	Co-expression	Wang-McClelland-2010 A
CXCR1	IL17	0.0178505	Co-expression	Wang-McClelland-2010 A
CXCR1	CXCR2	0.0193454	Co-expression	Wang-McClelland-2010 A
CXCR1	IL8	0.00820586	Co-expression	Wang-McClelland-2010 A
CXCR1	IL6	0.00446291	Co-expression	Wang-McClelland-2010 A
TNF	IL10	0.0152187	Co-expression	Wang-McClelland-2010 A
TNF	IFNG	0.0300989	Co-expression	Wang-McClelland-2010 A
TNF	IL8	0.0116561	Co-expression	Wang-McClelland-2010 A
TNF	IL1B	0.0198116	Co-expression	Wang-McClelland-2010 A
IL10RA	IL10	0.00462972	Co-expression	Wang-McClelland-2010 A
CXCL3	IL10	0.0124421	Co-expression	Wang-McClelland-2010 A
CXCL3	IFNG	0.0141479	Co-expression	Wang-McClelland-2010 A
CXCL3	IL8	0.0114176	Co-expression	Wang-McClelland-2010 A
CXCL3	IL1B	0.0107223	Co-expression	Wang-McClelland-2010 A
CXCL3	IL6	0.00498895	Co-expression	Wang-McClelland-2010 A
CXCL3	TNF	0.0172631	Co-expression	Wang-McClelland-2010 A
CCL4	IFNG	0.0169462	Co-expression	Wang-McClelland-2010 A
CCL4	IL8	0.00765839	Co-expression	Wang-McClelland-2010 A
CCL4	IL1B	0.00958494	Co-expression	Wang-McClelland-2010 A
CCL4	IL6	0.00453811	Co-expression	Wang-McClelland-2010 A
CCL4	TNF	0.0142973	Co-expression	Wang-McClelland-2010 A
CXCL1	IL8	0.00817229	Co-expression	Wang-McClelland-2010 A
CXCL1	CXCL3	0.0126022	Co-expression	Wang-McClelland-2010 A
CXCL2	IL10	0.0157211	Co-expression	Wang-McClelland-2010 A
CXCL2	IL8	0.0145916	Co-expression	Wang-McClelland-2010 A
CXCL2	IL1B	0.014173	Co-expression	Wang-McClelland-2010 A
CXCL2	IL6	0.00734017	Co-expression	Wang-McClelland-2010 A
CXCL2	TNF	0.0206871	Co-expression	Wang-McClelland-2010 A
CXCL2	CXCL3	0.0196909	Co-expression	Wang-McClelland-2010 A
CXCL2	CCL4	0.0114971	Co-expression	Wang-McClelland-2010 A
CXCL2	CXCL1	0.0133331	Co-expression	Wang-McClelland-2010 A
CCL20	IL10	0.0106342	Co-expression	Wang-McClelland-2010 A
CCL20	IL8	0.00824642	Co-expression	Wang-McClelland-2010 A
CCL20	CXCL3	0.012606	Co-expression	Wang-McClelland-2010 A
CCL20	CXCL1	0.0106276	Co-expression	Wang-McClelland-2010 A
CCL20	CXCL2	0.0143563	Co-expression	Wang-McClelland-2010 A
PTGS2	IL8	0.00984416	Co-expression	Wang-McClelland-2010 A
PTGS2	IL1B	0.0125016	Co-expression	Wang-McClelland-2010 A
PTGS2	IL6	0.00620965	Co-expression	Wang-McClelland-2010 A
PTGS2	TNF	0.0190486	Co-expression	Wang-McClelland-2010 A
PTGS2	CCL4	0.0101481	Co-expression	Wang-McClelland-2010 A
HCAR3	CXCR2	0.0140513	Co-expression	Wang-McClelland-2010 A
HCAR3	CXCL1	0.00945734	Co-expression	Wang-McClelland-2010 A
PROK2	IL17	0.0116053	Co-expression	Wang-McClelland-2010 A
PROK2	IL10	0.0101653	Co-expression	Wang-McClelland-2010 A
PROK2	CXCR2	0.0164201	Co-expression	Wang-McClelland-2010 A
PROK2	CXCR1	0.0135031	Co-expression	Wang-McClelland-2010 A
CSF3	CXCR2	0.00750638	Co-expression	Wang-McClelland-2010 A
CSF3	IL8	0.00555759	Co-expression	Wang-McClelland-2010 A
CSF3	IL6	0.0035858	Co-expression	Wang-McClelland-2010 A
CSF3	CXCR1	0.00716019	Co-expression	Wang-McClelland-2010 A
CSF3	CXCL3	0.00578958	Co-expression	Wang-McClelland-2010 A
CSF3	CXCL2	0.00828975	Co-expression	Wang-McClelland-2010 A
CSF3	PROK2	0.00590206	Co-expression	Wang-McClelland-2010 A
OSM	IL5	0.0181668	Co-expression	Wang-McClelland-2010 A
OSM	IL8	0.0123905	Co-expression	Wang-McClelland-2010 A
OSM	IL13	0.0132564	Co-expression	Wang-McClelland-2010 A
OSM	IL6	0.00707272	Co-expression	Wang-McClelland-2010 A
OSM	CCL4	0.012978	Co-expression	Wang-McClelland-2010 A
FPR1	IL8	0.0143876	Co-expression	Wang-McClelland-2010 A
FPR1	IL6	0.00748388	Co-expression	Wang-McClelland-2010 A
FPR1	CXCR1	0.020391	Co-expression	Wang-McClelland-2010 A
FPR1	PROK2	0.016292	Co-expression	Wang-McClelland-2010 A
FPR1	CSF3	0.0105386	Co-expression	Wang-McClelland-2010 A
TNFAIP3	IL10	0.00759456	Co-expression	Wang-McClelland-2010 A
TNFAIP3	IL8	0.00651947	Co-expression	Wang-McClelland-2010 A
TNFAIP3	IL1B	0.00759701	Co-expression	Wang-McClelland-2010 A
TNFAIP3	IL6	0.00392211	Co-expression	Wang-McClelland-2010 A
TNFAIP3	TNF	0.0102966	Co-expression	Wang-McClelland-2010 A
TNFAIP3	CXCL3	0.00791045	Co-expression	Wang-McClelland-2010 A
TNFAIP3	CXCL1	0.00624625	Co-expression	Wang-McClelland-2010 A
TNFAIP3	CXCL2	0.0112276	Co-expression	Wang-McClelland-2010 A
TNFAIP3	PTGS2	0.008825	Co-expression	Wang-McClelland-2010 A
TNFAIP3	CSF3	0.00502991	Co-expression	Wang-McClelland-2010 A
TNFAIP3	FPR1	0.0105657	Co-expression	Wang-McClelland-2010 A
IL12B	IL4	0.0138308	Co-expression	Lucas-Chute-2014
BRCA2	IL10	0.0144302	Co-expression	Lucas-Chute-2014
IFNG	IL4	0.0119225	Co-expression	Lucas-Chute-2014
IFNG	IL12B	0.00950616	Co-expression	Lucas-Chute-2014
IL7	IL10	0.00961788	Co-expression	Lucas-Chute-2014
IL7	BRCA2	0.0145464	Co-expression	Lucas-Chute-2014
IL8	IL7	0.00661016	Co-expression	Lucas-Chute-2014
IL6	IL12B	0.00863356	Co-expression	Lucas-Chute-2014
IL6	IFNG	0.00834523	Co-expression	Lucas-Chute-2014
IL6	IL1B	0.00782172	Co-expression	Lucas-Chute-2014
CXCR1	CXCR2	0.00186844	Co-expression	Lucas-Chute-2014
TNF	IL4	0.01191	Co-expression	Lucas-Chute-2014
TNF	IL12B	0.00991498	Co-expression	Lucas-Chute-2014
TNF	IFNG	0.00838529	Co-expression	Lucas-Chute-2014
TNF	IL6	0.00686881	Co-expression	Lucas-Chute-2014
NFKB1	IL4	0.00665379	Co-expression	Lucas-Chute-2014
NFKB1	IL1B	0.00452202	Co-expression	Lucas-Chute-2014
NFKB1	TNF	0.00469504	Co-expression	Lucas-Chute-2014
IL12A	IFNG	0.0103587	Co-expression	Lucas-Chute-2014
IL12A	TNF	0.00851439	Co-expression	Lucas-Chute-2014
CXCL3	IL10	0.00576874	Co-expression	Lucas-Chute-2014
CXCL3	IL7	0.00574307	Co-expression	Lucas-Chute-2014
CXCL3	IL8	0.00481545	Co-expression	Lucas-Chute-2014
CCL4	IL4	0.00863324	Co-expression	Lucas-Chute-2014
CCL4	IFNG	0.00689348	Co-expression	Lucas-Chute-2014
CCL4	IL8	0.00532843	Co-expression	Lucas-Chute-2014
CCL4	IL1B	0.00655004	Co-expression	Lucas-Chute-2014
CCL4	IL6	0.00617658	Co-expression	Lucas-Chute-2014
CCL4	TNF	0.00630571	Co-expression	Lucas-Chute-2014
CCL4	NFKB1	0.00406369	Co-expression	Lucas-Chute-2014
CCL4	CXCL3	0.00436486	Co-expression	Lucas-Chute-2014
CXCL1	IL8	0.00709481	Co-expression	Lucas-Chute-2014
CXCL1	IL1B	0.0107542	Co-expression	Lucas-Chute-2014
CXCL1	IL6	0.0085943	Co-expression	Lucas-Chute-2014
CXCL1	CXCL3	0.00605509	Co-expression	Lucas-Chute-2014
CXCL1	CCL4	0.00725434	Co-expression	Lucas-Chute-2014
CXCL2	IL10	0.00625952	Co-expression	Lucas-Chute-2014
CXCL2	IL7	0.00611929	Co-expression	Lucas-Chute-2014
CXCL2	IL8	0.00512749	Co-expression	Lucas-Chute-2014
CXCL2	CXCL3	0.00442606	Co-expression	Lucas-Chute-2014
CXCL2	CCL4	0.00473866	Co-expression	Lucas-Chute-2014
CXCL2	CXCL1	0.00642834	Co-expression	Lucas-Chute-2014
CCL20	IL4	0.00798374	Co-expression	Lucas-Chute-2014
CCL20	IL12B	0.00608748	Co-expression	Lucas-Chute-2014
CCL20	BRCA2	0.00946815	Co-expression	Lucas-Chute-2014
CCL20	IFNG	0.00609745	Co-expression	Lucas-Chute-2014
CCL20	IL1B	0.00618327	Co-expression	Lucas-Chute-2014
CCL20	IL6	0.00624452	Co-expression	Lucas-Chute-2014
CCL20	TNF	0.0056826	Co-expression	Lucas-Chute-2014
CCL20	CXCL3	0.00368252	Co-expression	Lucas-Chute-2014
CCL20	CCL4	0.00537663	Co-expression	Lucas-Chute-2014
CCL20	CXCL1	0.00707056	Co-expression	Lucas-Chute-2014
CCL20	CXCL2	0.00397773	Co-expression	Lucas-Chute-2014
PTGS2	IL1B	0.0119621	Co-expression	Lucas-Chute-2014
PTGS2	IL6	0.0100162	Co-expression	Lucas-Chute-2014
PTGS2	TNF	0.0093488	Co-expression	Lucas-Chute-2014
PTGS2	NFKB1	0.00556468	Co-expression	Lucas-Chute-2014
PTGS2	CXCL1	0.0127565	Co-expression	Lucas-Chute-2014
PTGS2	CCL20	0.00756798	Co-expression	Lucas-Chute-2014
IL1A	IL1B	0.0128783	Co-expression	Lucas-Chute-2014
IL1A	TNF	0.0119148	Co-expression	Lucas-Chute-2014
CSF3	IL12B	0.0102205	Co-expression	Lucas-Chute-2014
CSF3	IL1B	0.00729892	Co-expression	Lucas-Chute-2014
CSF3	IL6	0.00848929	Co-expression	Lucas-Chute-2014
CSF3	CCL20	0.0057777	Co-expression	Lucas-Chute-2014
OSM	CXCL1	0.0108963	Co-expression	Lucas-Chute-2014
FPR1	CXCR1	0.00352328	Co-expression	Lucas-Chute-2014
IL17RA	BRCA1	0.0108661	Co-expression	Lucas-Chute-2014
TNFAIP3	IL8	0.0037826	Co-expression	Lucas-Chute-2014
TNFAIP3	IL1B	0.00442246	Co-expression	Lucas-Chute-2014
TNFAIP3	NFKB1	0.00295001	Co-expression	Lucas-Chute-2014
TNFAIP3	CCL4	0.0043231	Co-expression	Lucas-Chute-2014
TNFAIP3	CCL20	0.00336352	Co-expression	Lucas-Chute-2014
IL10	IL17	0.0232933	Co-expression	Arijs-Rutgeerts-2009
IFNG	IL12B	0.0198887	Co-expression	Arijs-Rutgeerts-2009
IL8	IL17	0.00845236	Co-expression	Arijs-Rutgeerts-2009
IL8	CXCR2	0.00458657	Co-expression	Arijs-Rutgeerts-2009
IL8	IFNG	0.00756461	Co-expression	Arijs-Rutgeerts-2009
IL1B	CXCR2	0.00482984	Co-expression	Arijs-Rutgeerts-2009
IL1B	IL8	0.00522344	Co-expression	Arijs-Rutgeerts-2009
IL6	CXCR2	0.00749387	Co-expression	Arijs-Rutgeerts-2009
IL6	IL8	0.00843675	Co-expression	Arijs-Rutgeerts-2009
IL6	IL1B	0.00871166	Co-expression	Arijs-Rutgeerts-2009
CXCR1	CXCR2	0.00695074	Co-expression	Arijs-Rutgeerts-2009
CXCR1	IL8	0.00677206	Co-expression	Arijs-Rutgeerts-2009
CXCR1	IL1B	0.00730849	Co-expression	Arijs-Rutgeerts-2009
TNF	IL12B	0.0197946	Co-expression	Arijs-Rutgeerts-2009
TNF	CXCR2	0.00870071	Co-expression	Arijs-Rutgeerts-2009
TNF	IL8	0.00950537	Co-expression	Arijs-Rutgeerts-2009
TNF	IL1B	0.0103534	Co-expression	Arijs-Rutgeerts-2009
TNF	IL6	0.0203847	Co-expression	Arijs-Rutgeerts-2009
TNF	CXCR1	0.0132393	Co-expression	Arijs-Rutgeerts-2009
NFKB1	IL1B	0.00607176	Co-expression	Arijs-Rutgeerts-2009
CCL4	IL12B	0.0130857	Co-expression	Arijs-Rutgeerts-2009
CCL4	CXCR2	0.00676776	Co-expression	Arijs-Rutgeerts-2009
CCL4	IL8	0.00775115	Co-expression	Arijs-Rutgeerts-2009
CCL4	IL1B	0.0083052	Co-expression	Arijs-Rutgeerts-2009
CCL4	IL6	0.013632	Co-expression	Arijs-Rutgeerts-2009
CCL4	CXCR1	0.0105026	Co-expression	Arijs-Rutgeerts-2009
CCL4	TNF	0.0169061	Co-expression	Arijs-Rutgeerts-2009
CXCL1	IL17	0.00834627	Co-expression	Arijs-Rutgeerts-2009
CXCL1	CXCL3	0.00346984	Co-expression	Arijs-Rutgeerts-2009
CXCL2	CXCL3	0.0110144	Co-expression	Arijs-Rutgeerts-2009
CXCL2	CXCL1	0.00957354	Co-expression	Arijs-Rutgeerts-2009
PTGS2	CXCR2	0.00603141	Co-expression	Arijs-Rutgeerts-2009
PTGS2	IL8	0.00639907	Co-expression	Arijs-Rutgeerts-2009
PTGS2	IL1B	0.00678753	Co-expression	Arijs-Rutgeerts-2009
PTGS2	IL6	0.0119898	Co-expression	Arijs-Rutgeerts-2009
PTGS2	TNF	0.0130503	Co-expression	Arijs-Rutgeerts-2009
PTGS2	CCL4	0.00959527	Co-expression	Arijs-Rutgeerts-2009
NLRP7	IL10RA	0.00358492	Co-expression	Arijs-Rutgeerts-2009
HCAR3	CXCR2	0.00682701	Co-expression	Arijs-Rutgeerts-2009
HCAR3	IFNG	0.0119315	Co-expression	Arijs-Rutgeerts-2009
HCAR3	IL8	0.00765483	Co-expression	Arijs-Rutgeerts-2009
HCAR3	IL1B	0.00794074	Co-expression	Arijs-Rutgeerts-2009
HCAR3	CXCR1	0.010603	Co-expression	Arijs-Rutgeerts-2009
HCAR3	CCL4	0.0120723	Co-expression	Arijs-Rutgeerts-2009
IL1A	CXCR2	0.00882198	Co-expression	Arijs-Rutgeerts-2009
IL1A	IL8	0.00986227	Co-expression	Arijs-Rutgeerts-2009
IL1A	IL1B	0.0111985	Co-expression	Arijs-Rutgeerts-2009
IL1A	IL6	0.0187628	Co-expression	Arijs-Rutgeerts-2009
IL1A	CXCR1	0.0143379	Co-expression	Arijs-Rutgeerts-2009
IL1A	TNF	0.0237524	Co-expression	Arijs-Rutgeerts-2009
IL1A	CCL4	0.0164903	Co-expression	Arijs-Rutgeerts-2009
IL1A	PTGS2	0.0132188	Co-expression	Arijs-Rutgeerts-2009
IL23A	IL10RA	0.00345604	Co-expression	Arijs-Rutgeerts-2009
PROK2	IL17	0.0107066	Co-expression	Arijs-Rutgeerts-2009
PROK2	CXCR2	0.00592635	Co-expression	Arijs-Rutgeerts-2009
PROK2	IL8	0.00583516	Co-expression	Arijs-Rutgeerts-2009
PROK2	IL1B	0.00603829	Co-expression	Arijs-Rutgeerts-2009
PROK2	CXCR1	0.00824136	Co-expression	Arijs-Rutgeerts-2009
PROK2	PTGS2	0.00766537	Co-expression	Arijs-Rutgeerts-2009
CSF3	IL6	0.0131869	Co-expression	Arijs-Rutgeerts-2009
CSF3	TNF	0.0123091	Co-expression	Arijs-Rutgeerts-2009
CSF3	PTGS2	0.0079351	Co-expression	Arijs-Rutgeerts-2009
OSM	CXCR2	0.00780666	Co-expression	Arijs-Rutgeerts-2009
OSM	IL8	0.00796199	Co-expression	Arijs-Rutgeerts-2009
OSM	IL1B	0.00873145	Co-expression	Arijs-Rutgeerts-2009
OSM	CXCR1	0.0116376	Co-expression	Arijs-Rutgeerts-2009
OSM	TNF	0.016825	Co-expression	Arijs-Rutgeerts-2009
OSM	CCL4	0.0129662	Co-expression	Arijs-Rutgeerts-2009
OSM	PTGS2	0.0114039	Co-expression	Arijs-Rutgeerts-2009
OSM	HCAR3	0.0121141	Co-expression	Arijs-Rutgeerts-2009
OSM	IL1A	0.0165438	Co-expression	Arijs-Rutgeerts-2009
OSM	PROK2	0.00949035	Co-expression	Arijs-Rutgeerts-2009
FPR1	IL17	0.00996502	Co-expression	Arijs-Rutgeerts-2009
FPR1	CXCR2	0.00574922	Co-expression	Arijs-Rutgeerts-2009
FPR1	IL8	0.00575987	Co-expression	Arijs-Rutgeerts-2009
FPR1	IL1B	0.00592339	Co-expression	Arijs-Rutgeerts-2009
FPR1	CXCR1	0.00840015	Co-expression	Arijs-Rutgeerts-2009
FPR1	TNF	0.0107422	Co-expression	Arijs-Rutgeerts-2009
FPR1	HCAR3	0.00851043	Co-expression	Arijs-Rutgeerts-2009
FPR1	PROK2	0.00761019	Co-expression	Arijs-Rutgeerts-2009
FPR1	OSM	0.00944913	Co-expression	Arijs-Rutgeerts-2009
TNFAIP3	CXCR2	0.00776906	Co-expression	Arijs-Rutgeerts-2009
TNFAIP3	IL8	0.00866938	Co-expression	Arijs-Rutgeerts-2009
TNFAIP3	IL1B	0.00931943	Co-expression	Arijs-Rutgeerts-2009
TNFAIP3	IL6	0.016203	Co-expression	Arijs-Rutgeerts-2009
TNFAIP3	TNF	0.0186583	Co-expression	Arijs-Rutgeerts-2009
TNFAIP3	CCL4	0.0141426	Co-expression	Arijs-Rutgeerts-2009
TNFAIP3	PTGS2	0.0123313	Co-expression	Arijs-Rutgeerts-2009
TNFAIP3	IL1A	0.0201175	Co-expression	Arijs-Rutgeerts-2009
TNFAIP3	IL23A	0.0159249	Co-expression	Arijs-Rutgeerts-2009
TNFAIP3	OSM	0.014442	Co-expression	Arijs-Rutgeerts-2009
CXCR2	IL12B	0.00520269	Co-expression	Toedter-Baribaud-2011
IFNG	IL12B	0.0219612	Co-expression	Toedter-Baribaud-2011
IFNG	CXCR2	0.00603424	Co-expression	Toedter-Baribaud-2011
IL8	IL10	0.0106379	Co-expression	Toedter-Baribaud-2011
IL8	CXCR2	0.00486154	Co-expression	Toedter-Baribaud-2011
IL1B	IL10	0.00682039	Co-expression	Toedter-Baribaud-2011
IL1B	IL12B	0.00469135	Co-expression	Toedter-Baribaud-2011
IL1B	CXCR2	0.00340589	Co-expression	Toedter-Baribaud-2011
IL1B	IL8	0.0052764	Co-expression	Toedter-Baribaud-2011
IL6	IL10	0.013331	Co-expression	Toedter-Baribaud-2011
IL6	IL8	0.00778868	Co-expression	Toedter-Baribaud-2011
IL6	IL1B	0.00555015	Co-expression	Toedter-Baribaud-2011
CXCR1	IL12B	0.00693154	Co-expression	Toedter-Baribaud-2011
CXCR1	CXCR2	0.00447701	Co-expression	Toedter-Baribaud-2011
CXCR1	IFNG	0.00789165	Co-expression	Toedter-Baribaud-2011
CXCR1	IL8	0.0058857	Co-expression	Toedter-Baribaud-2011
CXCR1	IL1B	0.00422355	Co-expression	Toedter-Baribaud-2011
TNF	IL12B	0.0167827	Co-expression	Toedter-Baribaud-2011
TNF	CXCR2	0.00644622	Co-expression	Toedter-Baribaud-2011
TNF	IFNG	0.0157979	Co-expression	Toedter-Baribaud-2011
TNF	IL1B	0.00623131	Co-expression	Toedter-Baribaud-2011
TNF	CXCR1	0.00796795	Co-expression	Toedter-Baribaud-2011
NFKB1	TNF	0.0129988	Co-expression	Toedter-Baribaud-2011
CXCL3	IL17	0.0103323	Co-expression	Toedter-Baribaud-2011
CCL4	IL12B	0.00760722	Co-expression	Toedter-Baribaud-2011
CCL4	CXCR2	0.00445666	Co-expression	Toedter-Baribaud-2011
CCL4	IL1B	0.00448018	Co-expression	Toedter-Baribaud-2011
CCL4	CXCR1	0.00539285	Co-expression	Toedter-Baribaud-2011
CCL4	TNF	0.0103607	Co-expression	Toedter-Baribaud-2011
CCL4	NFKB1	0.00821173	Co-expression	Toedter-Baribaud-2011
CXCL1	IL17	0.00788968	Co-expression	Toedter-Baribaud-2011
CXCL1	IL10	0.00703795	Co-expression	Toedter-Baribaud-2011
CXCL1	IFNG	0.00642873	Co-expression	Toedter-Baribaud-2011
CXCL1	CXCL3	0.00438407	Co-expression	Toedter-Baribaud-2011
CXCL2	CXCL3	0.0150768	Co-expression	Toedter-Baribaud-2011
CXCL2	CXCL1	0.00977942	Co-expression	Toedter-Baribaud-2011
PTGS2	IL8	0.00758165	Co-expression	Toedter-Baribaud-2011
PTGS2	IL1B	0.00499739	Co-expression	Toedter-Baribaud-2011
PTGS2	IL6	0.00813821	Co-expression	Toedter-Baribaud-2011
PTGS2	CXCR1	0.00552283	Co-expression	Toedter-Baribaud-2011
NLRP7	CXCL1	0.0054935	Co-expression	Toedter-Baribaud-2011
HCAR3	IL12B	0.00673723	Co-expression	Toedter-Baribaud-2011
HCAR3	CXCR2	0.00404403	Co-expression	Toedter-Baribaud-2011
HCAR3	IFNG	0.00813856	Co-expression	Toedter-Baribaud-2011
HCAR3	IL8	0.00625333	Co-expression	Toedter-Baribaud-2011
HCAR3	IL1B	0.00430519	Co-expression	Toedter-Baribaud-2011
HCAR3	IL6	0.00607288	Co-expression	Toedter-Baribaud-2011
HCAR3	CXCR1	0.00507947	Co-expression	Toedter-Baribaud-2011
HCAR3	TNF	0.00754488	Co-expression	Toedter-Baribaud-2011
HCAR3	CCL4	0.00523978	Co-expression	Toedter-Baribaud-2011
HCAR3	PTGS2	0.00586749	Co-expression	Toedter-Baribaud-2011
IL1A	CXCR2	0.00940587	Co-expression	Toedter-Baribaud-2011
IL1A	CCL4	0.0135055	Co-expression	Toedter-Baribaud-2011
PROK2	IL8	0.00688391	Co-expression	Toedter-Baribaud-2011
PROK2	IL1B	0.00448799	Co-expression	Toedter-Baribaud-2011
PROK2	PTGS2	0.00694483	Co-expression	Toedter-Baribaud-2011
PROK2	HCAR3	0.00534565	Co-expression	Toedter-Baribaud-2011
CSF3	IL10	0.00895113	Co-expression	Toedter-Baribaud-2011
CSF3	IL1B	0.00358561	Co-expression	Toedter-Baribaud-2011
CSF3	IL6	0.00775591	Co-expression	Toedter-Baribaud-2011
OSM	IL8	0.00704593	Co-expression	Toedter-Baribaud-2011
OSM	IL1B	0.00485173	Co-expression	Toedter-Baribaud-2011
OSM	PTGS2	0.00772527	Co-expression	Toedter-Baribaud-2011
OSM	HCAR3	0.00580716	Co-expression	Toedter-Baribaud-2011
OSM	PROK2	0.00679336	Co-expression	Toedter-Baribaud-2011
FPR1	CXCR2	0.00342254	Co-expression	Toedter-Baribaud-2011
FPR1	IL8	0.00510123	Co-expression	Toedter-Baribaud-2011
FPR1	IL1B	0.00348506	Co-expression	Toedter-Baribaud-2011
FPR1	CXCR1	0.00418911	Co-expression	Toedter-Baribaud-2011
FPR1	PTGS2	0.00473612	Co-expression	Toedter-Baribaud-2011
FPR1	HCAR3	0.00413019	Co-expression	Toedter-Baribaud-2011
FPR1	PROK2	0.00447391	Co-expression	Toedter-Baribaud-2011
FPR1	OSM	0.00460433	Co-expression	Toedter-Baribaud-2011
IL17RA	CXCR2	0.0100321	Co-expression	Toedter-Baribaud-2011
IL17RA	FPR1	0.0106249	Co-expression	Toedter-Baribaud-2011
TNFAIP3	IL10	0.00795166	Co-expression	Toedter-Baribaud-2011
TNFAIP3	IL1B	0.00374756	Co-expression	Toedter-Baribaud-2011
TNFAIP3	IL6	0.00592032	Co-expression	Toedter-Baribaud-2011
TNFAIP3	NFKB1	0.00667192	Co-expression	Toedter-Baribaud-2011
TNFAIP3	CCL4	0.00494737	Co-expression	Toedter-Baribaud-2011
TNFAIP3	PTGS2	0.00525333	Co-expression	Toedter-Baribaud-2011
TNFAIP3	IL1A	0.0106307	Co-expression	Toedter-Baribaud-2011
TNFAIP3	OSM	0.00517467	Co-expression	Toedter-Baribaud-2011
TNFAIP3	FPR1	0.00365224	Co-expression	Toedter-Baribaud-2011
IFNG	IL4	0.0275013	Co-expression	Niu-Wang-2010
IFNG	IL12B	0.0260053	Co-expression	Niu-Wang-2010
IL8	IL4	0.0161317	Co-expression	Niu-Wang-2010
IL8	IFNG	0.0123637	Co-expression	Niu-Wang-2010
IL13	IL4	0.0161867	Co-expression	Niu-Wang-2010
IL13	IFNG	0.0133026	Co-expression	Niu-Wang-2010
IL6	IFNG	0.0135826	Co-expression	Niu-Wang-2010
IL6	IL13	0.0200139	Co-expression	Niu-Wang-2010
TNF	IL10	0.00980183	Co-expression	Niu-Wang-2010
IL10RA	IL12B	0.0108234	Co-expression	Niu-Wang-2010
CCL4	IL8	0.0145955	Co-expression	Niu-Wang-2010
NLRP7	IL1B	0.0207696	Co-expression	Niu-Wang-2010
HCAR3	IL1B	0.0212515	Co-expression	Niu-Wang-2010
PROK2	IL17	0.0171544	Co-expression	Niu-Wang-2010
TNFAIP3	NFKB1	0.00386001	Co-expression	Niu-Wang-2010
TNFAIP3	CCL4	0.00621682	Co-expression	Niu-Wang-2010
IL12B	IL17	0.0185357	Co-expression	Brodmerkel-Krueger-2019 B
IFNG	IL17	0.0295094	Co-expression	Brodmerkel-Krueger-2019 B
IFNG	IL12B	0.0160238	Co-expression	Brodmerkel-Krueger-2019 B
IL8	IL17	0.0170623	Co-expression	Brodmerkel-Krueger-2019 B
IL1B	IL17	0.0141283	Co-expression	Brodmerkel-Krueger-2019 B
IL1B	IL12B	0.0110874	Co-expression	Brodmerkel-Krueger-2019 B
IL1B	IFNG	0.0107216	Co-expression	Brodmerkel-Krueger-2019 B
IL1B	IL8	0.0148939	Co-expression	Brodmerkel-Krueger-2019 B
TNF	IFNG	0.0207394	Co-expression	Brodmerkel-Krueger-2019 B
CXCL3	IL17	0.0181043	Co-expression	Brodmerkel-Krueger-2019 B
CXCL3	IL12B	0.0132186	Co-expression	Brodmerkel-Krueger-2019 B
CCL4	IL17	0.0271633	Co-expression	Brodmerkel-Krueger-2019 B
CCL4	IFNG	0.0295045	Co-expression	Brodmerkel-Krueger-2019 B
CCL4	IL8	0.0169374	Co-expression	Brodmerkel-Krueger-2019 B
CCL4	IL1B	0.0130983	Co-expression	Brodmerkel-Krueger-2019 B
CCL4	CXCL3	0.0318774	Co-expression	Brodmerkel-Krueger-2019 B
CXCL1	IL17	0.0054084	Co-expression	Brodmerkel-Krueger-2019 B
CXCL1	IL12B	0.00440163	Co-expression	Brodmerkel-Krueger-2019 B
CXCL1	IL8	0.00566121	Co-expression	Brodmerkel-Krueger-2019 B
CXCL1	IL1B	0.00433038	Co-expression	Brodmerkel-Krueger-2019 B
CXCL1	CCL4	0.00464134	Co-expression	Brodmerkel-Krueger-2019 B
CXCL2	IL17	0.00669028	Co-expression	Brodmerkel-Krueger-2019 B
CXCL2	IL12B	0.00555037	Co-expression	Brodmerkel-Krueger-2019 B
CXCL2	IFNG	0.0047553	Co-expression	Brodmerkel-Krueger-2019 B
CXCL2	IL8	0.00622993	Co-expression	Brodmerkel-Krueger-2019 B
CXCL2	IL1B	0.00487924	Co-expression	Brodmerkel-Krueger-2019 B
CXCL2	CXCL3	0.00657034	Co-expression	Brodmerkel-Krueger-2019 B
CXCL2	CCL4	0.00621184	Co-expression	Brodmerkel-Krueger-2019 B
CXCL2	CXCL1	0.00233865	Co-expression	Brodmerkel-Krueger-2019 B
CCL20	IL17	0.00551996	Co-expression	Brodmerkel-Krueger-2019 B
CCL20	IL12B	0.00435378	Co-expression	Brodmerkel-Krueger-2019 B
CCL20	CXCR2	0.00167483	Co-expression	Brodmerkel-Krueger-2019 B
CCL20	IL8	0.00533028	Co-expression	Brodmerkel-Krueger-2019 B
CCL20	IL1B	0.0040631	Co-expression	Brodmerkel-Krueger-2019 B
CCL20	CCL4	0.00501803	Co-expression	Brodmerkel-Krueger-2019 B
CCL20	CXCL1	0.00188155	Co-expression	Brodmerkel-Krueger-2019 B
CCL20	CXCL2	0.00226656	Co-expression	Brodmerkel-Krueger-2019 B
PTGS2	IL8	0.0154742	Co-expression	Brodmerkel-Krueger-2019 B
PTGS2	IL1B	0.0131005	Co-expression	Brodmerkel-Krueger-2019 B
PTGS2	CXCL2	0.00639836	Co-expression	Brodmerkel-Krueger-2019 B
NLRP7	IL17	0.026058	Co-expression	Brodmerkel-Krueger-2019 B
NLRP7	IL8	0.0184977	Co-expression	Brodmerkel-Krueger-2019 B
NLRP7	IL1B	0.0152018	Co-expression	Brodmerkel-Krueger-2019 B
NLRP7	CCL4	0.0241336	Co-expression	Brodmerkel-Krueger-2019 B
NLRP7	CXCL1	0.00585784	Co-expression	Brodmerkel-Krueger-2019 B
NLRP7	CCL20	0.00537528	Co-expression	Brodmerkel-Krueger-2019 B
HCAR3	CXCR2	0.00397652	Co-expression	Brodmerkel-Krueger-2019 B
IL1A	IL12B	0.0146239	Co-expression	Brodmerkel-Krueger-2019 B
IL1A	IL1B	0.011934	Co-expression	Brodmerkel-Krueger-2019 B
IL23A	IL12B	0.0149144	Co-expression	Brodmerkel-Krueger-2019 B
IL23A	IFNG	0.0219282	Co-expression	Brodmerkel-Krueger-2019 B
IL23A	IL1B	0.00997893	Co-expression	Brodmerkel-Krueger-2019 B
IL23A	TNF	0.0247212	Co-expression	Brodmerkel-Krueger-2019 B
IL23A	NLRP7	0.0194757	Co-expression	Brodmerkel-Krueger-2019 B
IL23A	IL1A	0.0242147	Co-expression	Brodmerkel-Krueger-2019 B
PROK2	IL8	0.0141638	Co-expression	Brodmerkel-Krueger-2019 B
PROK2	IL1B	0.0129998	Co-expression	Brodmerkel-Krueger-2019 B
PROK2	CXCL3	0.0282305	Co-expression	Brodmerkel-Krueger-2019 B
PROK2	CCL4	0.0185942	Co-expression	Brodmerkel-Krueger-2019 B
PROK2	PTGS2	0.0225162	Co-expression	Brodmerkel-Krueger-2019 B
OSM	IL8	0.0187278	Co-expression	Brodmerkel-Krueger-2019 B
OSM	IL1B	0.0182024	Co-expression	Brodmerkel-Krueger-2019 B
OSM	CCL4	0.0199389	Co-expression	Brodmerkel-Krueger-2019 B
OSM	CXCL1	0.00353847	Co-expression	Brodmerkel-Krueger-2019 B
OSM	PTGS2	0.0252966	Co-expression	Brodmerkel-Krueger-2019 B
OSM	NLRP7	0.0167245	Co-expression	Brodmerkel-Krueger-2019 B
OSM	IL1A	0.0207283	Co-expression	Brodmerkel-Krueger-2019 B
OSM	PROK2	0.042665	Co-expression	Brodmerkel-Krueger-2019 B
FPR1	IL1B	0.0122573	Co-expression	Brodmerkel-Krueger-2019 B
FPR1	IL6	0.0215482	Co-expression	Brodmerkel-Krueger-2019 B
FPR1	CXCL3	0.0179747	Co-expression	Brodmerkel-Krueger-2019 B
FPR1	CCL4	0.0204688	Co-expression	Brodmerkel-Krueger-2019 B
FPR1	CXCL1	0.00431501	Co-expression	Brodmerkel-Krueger-2019 B
FPR1	CXCL2	0.00568946	Co-expression	Brodmerkel-Krueger-2019 B
FPR1	IL1A	0.0171718	Co-expression	Brodmerkel-Krueger-2019 B
FPR1	PROK2	0.0208558	Co-expression	Brodmerkel-Krueger-2019 B
FPR1	OSM	0.0223226	Co-expression	Brodmerkel-Krueger-2019 B
TNFAIP3	IL12B	0.0163265	Co-expression	Brodmerkel-Krueger-2019 B
TNFAIP3	IL7	0.0235068	Co-expression	Brodmerkel-Krueger-2019 B
TNFAIP3	CXCL2	0.00726957	Co-expression	Brodmerkel-Krueger-2019 B
TNFAIP3	PTGS2	0.0261839	Co-expression	Brodmerkel-Krueger-2019 B
IL8	CXCR2	0.0198557	Co-expression	Woodruff-Fahy-2007
IL1B	CXCR2	0.0168127	Co-expression	Woodruff-Fahy-2007
IL6	IFNG	0.0176005	Co-expression	Woodruff-Fahy-2007
CXCR1	CXCR2	0.0185167	Co-expression	Woodruff-Fahy-2007
CXCR1	IL1B	0.0181157	Co-expression	Woodruff-Fahy-2007
CXCR1	IL6	0.0209249	Co-expression	Woodruff-Fahy-2007
TNF	IL1B	0.0197548	Co-expression	Woodruff-Fahy-2007
TNF	CXCR1	0.0189606	Co-expression	Woodruff-Fahy-2007
IL10RA	IL1B	0.00582468	Co-expression	Woodruff-Fahy-2007
IL10RA	TNF	0.00717725	Co-expression	Woodruff-Fahy-2007
CXCL3	IL1B	0.0159202	Co-expression	Woodruff-Fahy-2007
CXCL3	TNF	0.0162432	Co-expression	Woodruff-Fahy-2007
CXCL3	IL10RA	0.00586174	Co-expression	Woodruff-Fahy-2007
CCL4	IL1B	0.0218051	Co-expression	Woodruff-Fahy-2007
CCL4	TNF	0.0283061	Co-expression	Woodruff-Fahy-2007
CCL4	IL10RA	0.00738209	Co-expression	Woodruff-Fahy-2007
CCL4	CXCL3	0.0207639	Co-expression	Woodruff-Fahy-2007
CCL20	IL1B	0.0210495	Co-expression	Woodruff-Fahy-2007
CCL20	IL6	0.0251946	Co-expression	Woodruff-Fahy-2007
CCL20	CXCR1	0.024362	Co-expression	Woodruff-Fahy-2007
CCL20	TNF	0.0213659	Co-expression	Woodruff-Fahy-2007
CCL20	IL10RA	0.00576481	Co-expression	Woodruff-Fahy-2007
CCL20	CXCL3	0.0178525	Co-expression	Woodruff-Fahy-2007
CCL20	CCL4	0.0260409	Co-expression	Woodruff-Fahy-2007
PROK2	CXCR2	0.0254986	Co-expression	Woodruff-Fahy-2007
PROK2	IL8	0.0287161	Co-expression	Woodruff-Fahy-2007
PROK2	IL1B	0.0191223	Co-expression	Woodruff-Fahy-2007
PROK2	CXCR1	0.0212379	Co-expression	Woodruff-Fahy-2007
PROK2	CCL20	0.0195298	Co-expression	Woodruff-Fahy-2007
PROK2	PTGS2	0.0287768	Co-expression	Woodruff-Fahy-2007
CSF3	IL6	0.0241384	Co-expression	Woodruff-Fahy-2007
CSF3	CXCR1	0.0221009	Co-expression	Woodruff-Fahy-2007
CSF3	CXCL2	0.03021	Co-expression	Woodruff-Fahy-2007
CSF3	CCL20	0.0215114	Co-expression	Woodruff-Fahy-2007
FPR1	IL1B	0.0183722	Co-expression	Woodruff-Fahy-2007
FPR1	TNF	0.0268577	Co-expression	Woodruff-Fahy-2007
FPR1	IL10RA	0.00757152	Co-expression	Woodruff-Fahy-2007
FPR1	CCL4	0.0247934	Co-expression	Woodruff-Fahy-2007
FPR1	CCL20	0.0252507	Co-expression	Woodruff-Fahy-2007
TNFAIP3	CCL20	0.0216286	Co-expression	Woodruff-Fahy-2007
IL10	IL2	0.0145157	Co-expression	Swan-Spiller-2013
IL12B	IL2	0.0130542	Co-expression	Swan-Spiller-2013
IL12B	IL17	0.0217075	Co-expression	Swan-Spiller-2013
IFNG	IL17	0.0202083	Co-expression	Swan-Spiller-2013
IFNG	IL12B	0.018369	Co-expression	Swan-Spiller-2013
IL1B	IL8	0.022379	Co-expression	Swan-Spiller-2013
IL6	IL8	0.0236162	Co-expression	Swan-Spiller-2013
IL6	IL1B	0.0168057	Co-expression	Swan-Spiller-2013
CXCR1	CXCR2	0.0218601	Co-expression	Swan-Spiller-2013
NFKB1	IL7	0.0158741	Co-expression	Swan-Spiller-2013
CXCL3	IL17	0.0172882	Co-expression	Swan-Spiller-2013
CXCL3	IL12B	0.015248	Co-expression	Swan-Spiller-2013
CXCL3	IFNG	0.0162765	Co-expression	Swan-Spiller-2013
CCL4	IL10	0.0220955	Co-expression	Swan-Spiller-2013
CCL4	IL8	0.0179726	Co-expression	Swan-Spiller-2013
CCL4	IL1B	0.0174289	Co-expression	Swan-Spiller-2013
CXCL1	IL17	0.0201469	Co-expression	Swan-Spiller-2013
CXCL1	IL12B	0.0176645	Co-expression	Swan-Spiller-2013
CXCL1	IFNG	0.020484	Co-expression	Swan-Spiller-2013
CXCL1	CXCL3	0.0170674	Co-expression	Swan-Spiller-2013
CXCL2	IL17	0.0198658	Co-expression	Swan-Spiller-2013
CXCL2	IFNG	0.0194502	Co-expression	Swan-Spiller-2013
CXCL2	CXCL3	0.0177385	Co-expression	Swan-Spiller-2013
CXCL2	CXCL1	0.021018	Co-expression	Swan-Spiller-2013
CCL20	IL12B	0.0156816	Co-expression	Swan-Spiller-2013
CCL20	IL1B	0.0150606	Co-expression	Swan-Spiller-2013
CCL20	TNF	0.0124878	Co-expression	Swan-Spiller-2013
PTGS2	IL8	0.0187669	Co-expression	Swan-Spiller-2013
PTGS2	IL1B	0.0169785	Co-expression	Swan-Spiller-2013
PTGS2	IL6	0.0169403	Co-expression	Swan-Spiller-2013
NLRP7	IL10RA	0.009655	Co-expression	Swan-Spiller-2013
HCAR3	IL8	0.0288855	Co-expression	Swan-Spiller-2013
PROK2	CXCR2	0.0257817	Co-expression	Swan-Spiller-2013
PROK2	CXCR1	0.0232934	Co-expression	Swan-Spiller-2013
PROK2	HCAR3	0.0150738	Co-expression	Swan-Spiller-2013
CSF3	IL8	0.0219384	Co-expression	Swan-Spiller-2013
CSF3	IL6	0.0208389	Co-expression	Swan-Spiller-2013
OSM	HCAR3	0.0235877	Co-expression	Swan-Spiller-2013
FPR1	CXCR2	0.0222328	Co-expression	Swan-Spiller-2013
FPR1	CXCR1	0.0214266	Co-expression	Swan-Spiller-2013
FPR1	PROK2	0.0234287	Co-expression	Swan-Spiller-2013
TNFAIP3	IL1B	0.0104783	Co-expression	Swan-Spiller-2013
TNFAIP3	CCL20	0.0105305	Co-expression	Swan-Spiller-2013
TNFAIP3	IL1A	0.0132299	Co-expression	Swan-Spiller-2013
IL10	IL2	0.0171985	Co-expression	Kazmin-Pulendran-2017
IFNG	IL12B	0.0092984	Co-expression	Kazmin-Pulendran-2017
IL7	BRCA2	0.00660069	Co-expression	Kazmin-Pulendran-2017
IL1B	IL8	0.0204111	Co-expression	Kazmin-Pulendran-2017
IL6	IL12B	0.00623899	Co-expression	Kazmin-Pulendran-2017
IL6	IFNG	0.00796228	Co-expression	Kazmin-Pulendran-2017
IL6	IL8	0.0103463	Co-expression	Kazmin-Pulendran-2017
IL6	IL1B	0.011057	Co-expression	Kazmin-Pulendran-2017
CXCR1	CXCR2	0.0265407	Co-expression	Kazmin-Pulendran-2017
TNF	IL12B	0.00804719	Co-expression	Kazmin-Pulendran-2017
TNF	IL8	0.0162336	Co-expression	Kazmin-Pulendran-2017
TNF	IL1B	0.0181808	Co-expression	Kazmin-Pulendran-2017
TNF	IL6	0.00956327	Co-expression	Kazmin-Pulendran-2017
NFKB1	IL5	0.00357757	Co-expression	Kazmin-Pulendran-2017
NFKB1	IL13	0.00490806	Co-expression	Kazmin-Pulendran-2017
IL12A	IFNG	0.01479	Co-expression	Kazmin-Pulendran-2017
CXCL3	IL8	0.0193177	Co-expression	Kazmin-Pulendran-2017
CXCL3	IL1B	0.0198268	Co-expression	Kazmin-Pulendran-2017
CXCL3	IL6	0.00962605	Co-expression	Kazmin-Pulendran-2017
CXCL3	TNF	0.0160944	Co-expression	Kazmin-Pulendran-2017
CCL4	IL12B	0.00723703	Co-expression	Kazmin-Pulendran-2017
CCL4	IFNG	0.0109439	Co-expression	Kazmin-Pulendran-2017
CCL4	IL8	0.0139308	Co-expression	Kazmin-Pulendran-2017
CCL4	IL1B	0.0155585	Co-expression	Kazmin-Pulendran-2017
CCL4	IL6	0.00853244	Co-expression	Kazmin-Pulendran-2017
CCL4	TNF	0.0140978	Co-expression	Kazmin-Pulendran-2017
CCL4	CXCL3	0.0138721	Co-expression	Kazmin-Pulendran-2017
CXCL1	IL12B	0.00974014	Co-expression	Kazmin-Pulendran-2017
CXCL1	IL8	0.0209984	Co-expression	Kazmin-Pulendran-2017
CXCL1	IL1B	0.0172146	Co-expression	Kazmin-Pulendran-2017
CXCL1	IL6	0.00985765	Co-expression	Kazmin-Pulendran-2017
CXCL1	TNF	0.0149702	Co-expression	Kazmin-Pulendran-2017
CXCL1	CXCL3	0.0225616	Co-expression	Kazmin-Pulendran-2017
CXCL1	CCL4	0.0128253	Co-expression	Kazmin-Pulendran-2017
CXCL2	IL8	0.0214557	Co-expression	Kazmin-Pulendran-2017
CXCL2	IL1B	0.0215454	Co-expression	Kazmin-Pulendran-2017
CXCL2	IL6	0.0104533	Co-expression	Kazmin-Pulendran-2017
CXCL2	TNF	0.0170192	Co-expression	Kazmin-Pulendran-2017
CXCL2	CXCL3	0.0221977	Co-expression	Kazmin-Pulendran-2017
CXCL2	CCL4	0.0141636	Co-expression	Kazmin-Pulendran-2017
CXCL2	CXCL1	0.0229996	Co-expression	Kazmin-Pulendran-2017
CCL20	IL12B	0.00725644	Co-expression	Kazmin-Pulendran-2017
CCL20	IL8	0.0159336	Co-expression	Kazmin-Pulendran-2017
CCL20	IL1B	0.0183341	Co-expression	Kazmin-Pulendran-2017
CCL20	IL6	0.00892314	Co-expression	Kazmin-Pulendran-2017
CCL20	TNF	0.0142084	Co-expression	Kazmin-Pulendran-2017
CCL20	CXCL3	0.0167046	Co-expression	Kazmin-Pulendran-2017
CCL20	CCL4	0.0121791	Co-expression	Kazmin-Pulendran-2017
CCL20	CXCL1	0.0160193	Co-expression	Kazmin-Pulendran-2017
CCL20	CXCL2	0.0180451	Co-expression	Kazmin-Pulendran-2017
PTGS2	IL8	0.0157373	Co-expression	Kazmin-Pulendran-2017
PTGS2	IL1B	0.0158946	Co-expression	Kazmin-Pulendran-2017
PTGS2	IL6	0.00837001	Co-expression	Kazmin-Pulendran-2017
PTGS2	TNF	0.0130467	Co-expression	Kazmin-Pulendran-2017
PTGS2	IL10RA	0.0121307	Co-expression	Kazmin-Pulendran-2017
PTGS2	CXCL3	0.014832	Co-expression	Kazmin-Pulendran-2017
PTGS2	CCL4	0.0112564	Co-expression	Kazmin-Pulendran-2017
PTGS2	CXCL1	0.0153296	Co-expression	Kazmin-Pulendran-2017
PTGS2	CXCL2	0.0152295	Co-expression	Kazmin-Pulendran-2017
PTGS2	CCL20	0.0125805	Co-expression	Kazmin-Pulendran-2017
BARD1	BRCA2	0.00883431	Co-expression	Kazmin-Pulendran-2017
BARD1	IL7	0.0121091	Co-expression	Kazmin-Pulendran-2017
IL1A	IL12B	0.00998027	Co-expression	Kazmin-Pulendran-2017
IL1A	IL8	0.0184641	Co-expression	Kazmin-Pulendran-2017
IL1A	IL1B	0.0199123	Co-expression	Kazmin-Pulendran-2017
IL1A	IL6	0.0112155	Co-expression	Kazmin-Pulendran-2017
IL1A	TNF	0.017023	Co-expression	Kazmin-Pulendran-2017
IL1A	CXCL3	0.0179163	Co-expression	Kazmin-Pulendran-2017
IL1A	CCL4	0.0140914	Co-expression	Kazmin-Pulendran-2017
IL1A	CXCL1	0.0193053	Co-expression	Kazmin-Pulendran-2017
IL1A	CXCL2	0.0202396	Co-expression	Kazmin-Pulendran-2017
IL1A	CCL20	0.0168672	Co-expression	Kazmin-Pulendran-2017
IL1A	PTGS2	0.0143611	Co-expression	Kazmin-Pulendran-2017
CSF3	IL12B	0.00408077	Co-expression	Kazmin-Pulendran-2017
CSF3	IFNG	0.00554683	Co-expression	Kazmin-Pulendran-2017
CSF3	NFKB1	0.00202326	Co-expression	Kazmin-Pulendran-2017
OSM	IL10	0.0222759	Co-expression	Kazmin-Pulendran-2017
OSM	PROK2	0.0192503	Co-expression	Kazmin-Pulendran-2017
FPR1	HCAR3	0.0203042	Co-expression	Kazmin-Pulendran-2017
TNFAIP3	IL8	0.0172117	Co-expression	Kazmin-Pulendran-2017
TNFAIP3	IL1B	0.0225779	Co-expression	Kazmin-Pulendran-2017
TNFAIP3	IL6	0.0106814	Co-expression	Kazmin-Pulendran-2017
TNFAIP3	TNF	0.0172052	Co-expression	Kazmin-Pulendran-2017
TNFAIP3	CXCL3	0.0187113	Co-expression	Kazmin-Pulendran-2017
TNFAIP3	CCL4	0.0150868	Co-expression	Kazmin-Pulendran-2017
TNFAIP3	CXCL2	0.0193713	Co-expression	Kazmin-Pulendran-2017
TNFAIP3	CCL20	0.0176623	Co-expression	Kazmin-Pulendran-2017
TNFAIP3	PTGS2	0.0137685	Co-expression	Kazmin-Pulendran-2017
TNFAIP3	IL1A	0.0193	Co-expression	Kazmin-Pulendran-2017
BRCA2	BRCA1	0.0127477	Co-expression	Li-Bleecker-2015
IL8	IL10	0.00799841	Co-expression	Li-Bleecker-2015
IL13	IL4	0.0335112	Co-expression	Li-Bleecker-2015
IL1B	IL8	0.0230328	Co-expression	Li-Bleecker-2015
IL6	IL1B	0.0192948	Co-expression	Li-Bleecker-2015
CXCR1	CXCR2	0.0170907	Co-expression	Li-Bleecker-2015
CXCR1	IL8	0.0171097	Co-expression	Li-Bleecker-2015
TNF	IL1B	0.0206954	Co-expression	Li-Bleecker-2015
NFKB1	IL12B	0.0161192	Co-expression	Li-Bleecker-2015
IL10RA	IFNG	0.0150035	Co-expression	Li-Bleecker-2015
CXCL3	IL1B	0.0165963	Co-expression	Li-Bleecker-2015
CXCL3	IL6	0.0202416	Co-expression	Li-Bleecker-2015
CCL4	IL10	0.00997357	Co-expression	Li-Bleecker-2015
CCL4	IL8	0.0191995	Co-expression	Li-Bleecker-2015
CCL4	IL1B	0.0151402	Co-expression	Li-Bleecker-2015
CCL4	IL6	0.0171217	Co-expression	Li-Bleecker-2015
CCL4	TNF	0.0195493	Co-expression	Li-Bleecker-2015
CXCL1	IL8	0.0214179	Co-expression	Li-Bleecker-2015
CXCL1	IL1B	0.0162854	Co-expression	Li-Bleecker-2015
CXCL2	IL1B	0.0150018	Co-expression	Li-Bleecker-2015
CXCL2	IL6	0.0200081	Co-expression	Li-Bleecker-2015
CXCL2	CXCL3	0.0332698	Co-expression	Li-Bleecker-2015
CCL20	IL10	0.00740089	Co-expression	Li-Bleecker-2015
CCL20	IL8	0.0207903	Co-expression	Li-Bleecker-2015
CCL20	IL1B	0.0208787	Co-expression	Li-Bleecker-2015
CCL20	IL6	0.02179	Co-expression	Li-Bleecker-2015
CCL20	TNF	0.018556	Co-expression	Li-Bleecker-2015
CCL20	CCL4	0.0268197	Co-expression	Li-Bleecker-2015
PTGS2	IL8	0.0180111	Co-expression	Li-Bleecker-2015
PTGS2	IL1B	0.018951	Co-expression	Li-Bleecker-2015
PTGS2	IL6	0.0200261	Co-expression	Li-Bleecker-2015
PTGS2	CXCL3	0.0217337	Co-expression	Li-Bleecker-2015
PTGS2	CXCL2	0.0209803	Co-expression	Li-Bleecker-2015
IL1A	IL1B	0.0340793	Co-expression	Li-Bleecker-2015
IL23A	IL13	0.0208014	Co-expression	Li-Bleecker-2015
PROK2	CXCR2	0.0178736	Co-expression	Li-Bleecker-2015
PROK2	IL8	0.0195782	Co-expression	Li-Bleecker-2015
PROK2	CXCR1	0.0188148	Co-expression	Li-Bleecker-2015
PROK2	CXCL1	0.0130206	Co-expression	Li-Bleecker-2015
OSM	IL6	0.0118163	Co-expression	Li-Bleecker-2015
OSM	CXCL3	0.0156178	Co-expression	Li-Bleecker-2015
OSM	CXCL2	0.0159769	Co-expression	Li-Bleecker-2015
OSM	PTGS2	0.0177843	Co-expression	Li-Bleecker-2015
OSM	HCAR3	0.0106863	Co-expression	Li-Bleecker-2015
TNFAIP3	IL2	0.0181353	Co-expression	Li-Bleecker-2015
TNFAIP3	IFNG	0.0129556	Co-expression	Li-Bleecker-2015
TNFAIP3	IL8	0.0155354	Co-expression	Li-Bleecker-2015
IL12B	IL4	0.0171043	Co-expression	Yu-Lee-2012
IFNG	IL2	0.0115796	Co-expression	Yu-Lee-2012
IL8	CXCR2	0.0117887	Co-expression	Yu-Lee-2012
IL1B	IL8	0.0089774	Co-expression	Yu-Lee-2012
IL6	IL10	0.0262768	Co-expression	Yu-Lee-2012
CXCR1	CXCR2	0.0175378	Co-expression	Yu-Lee-2012
TNF	IFNG	0.012215	Co-expression	Yu-Lee-2012
TNF	IL13	0.026583	Co-expression	Yu-Lee-2012
CXCL3	IL8	0.00919542	Co-expression	Yu-Lee-2012
CCL4	TNF	0.0112174	Co-expression	Yu-Lee-2012
CXCL1	IL8	0.00393315	Co-expression	Yu-Lee-2012
CXCL1	CXCL3	0.00681057	Co-expression	Yu-Lee-2012
CXCL2	IL8	0.00646246	Co-expression	Yu-Lee-2012
CXCL2	CXCL3	0.0121467	Co-expression	Yu-Lee-2012
CXCL2	CXCL1	0.00451473	Co-expression	Yu-Lee-2012
CCL20	IL12B	0.014418	Co-expression	Yu-Lee-2012
CCL20	TNF	0.0170076	Co-expression	Yu-Lee-2012
PTGS2	IL8	0.00587312	Co-expression	Yu-Lee-2012
PTGS2	IL1B	0.00864184	Co-expression	Yu-Lee-2012
PTGS2	CXCR1	0.00745498	Co-expression	Yu-Lee-2012
PTGS2	CCL20	0.00853021	Co-expression	Yu-Lee-2012
HCAR3	CXCR2	0.0111473	Co-expression	Yu-Lee-2012
HCAR3	IL8	0.00518741	Co-expression	Yu-Lee-2012
HCAR3	IL1B	0.00722072	Co-expression	Yu-Lee-2012
HCAR3	CXCR1	0.00674441	Co-expression	Yu-Lee-2012
HCAR3	CXCL3	0.00917943	Co-expression	Yu-Lee-2012
HCAR3	CXCL2	0.00616634	Co-expression	Yu-Lee-2012
HCAR3	CCL20	0.00828706	Co-expression	Yu-Lee-2012
HCAR3	PTGS2	0.00569393	Co-expression	Yu-Lee-2012
IL1A	IL12B	0.0223513	Co-expression	Yu-Lee-2012
IL1A	TNF	0.0137872	Co-expression	Yu-Lee-2012
IL1A	CXCL3	0.0171852	Co-expression	Yu-Lee-2012
IL1A	CXCL2	0.00867992	Co-expression	Yu-Lee-2012
IL1A	CCL20	0.0200064	Co-expression	Yu-Lee-2012
IL1A	HCAR3	0.00802957	Co-expression	Yu-Lee-2012
IL23A	IL6	0.01769	Co-expression	Yu-Lee-2012
PROK2	IL8	0.00672854	Co-expression	Yu-Lee-2012
PROK2	IL1B	0.0110769	Co-expression	Yu-Lee-2012
PROK2	PTGS2	0.00768276	Co-expression	Yu-Lee-2012
CSF3	IL12B	0.0224045	Co-expression	Yu-Lee-2012
CSF3	TNF	0.0168463	Co-expression	Yu-Lee-2012
CSF3	IL1A	0.0175419	Co-expression	Yu-Lee-2012
OSM	CCL4	0.0145622	Co-expression	Yu-Lee-2012
FPR1	CXCR2	0.017272	Co-expression	Yu-Lee-2012
FPR1	IL8	0.00803553	Co-expression	Yu-Lee-2012
FPR1	IL1B	0.0128711	Co-expression	Yu-Lee-2012
FPR1	PTGS2	0.00852264	Co-expression	Yu-Lee-2012
FPR1	PROK2	0.0108111	Co-expression	Yu-Lee-2012
TNFAIP3	IL6	0.031245	Co-expression	Yu-Lee-2012
BRCA2	IL10	0.00486981	Co-expression	Horiuchi-Sawa-2016
BRCA2	BRCA1	0.0087554	Co-expression	Horiuchi-Sawa-2016
IFNG	IL12B	0.0170568	Co-expression	Horiuchi-Sawa-2016
IL13	IL4	0.0176425	Co-expression	Horiuchi-Sawa-2016
IL6	IFNG	0.0144813	Co-expression	Horiuchi-Sawa-2016
IL6	IL8	0.0252852	Co-expression	Horiuchi-Sawa-2016
IL6	IL1B	0.0230297	Co-expression	Horiuchi-Sawa-2016
TNF	IL12B	0.0084597	Co-expression	Horiuchi-Sawa-2016
NFKB1	IL7	0.00330886	Co-expression	Horiuchi-Sawa-2016
IL10RA	IFNG	0.0152537	Co-expression	Horiuchi-Sawa-2016
IL10RA	TNF	0.00774337	Co-expression	Horiuchi-Sawa-2016
CCL4	IFNG	0.0121252	Co-expression	Horiuchi-Sawa-2016
CCL4	TNF	0.00702136	Co-expression	Horiuchi-Sawa-2016
CCL4	IL10RA	0.0110846	Co-expression	Horiuchi-Sawa-2016
CXCL1	CXCL3	0.00712421	Co-expression	Horiuchi-Sawa-2016
CXCL2	CXCL3	0.0147296	Co-expression	Horiuchi-Sawa-2016
CXCL2	CXCL1	0.00876247	Co-expression	Horiuchi-Sawa-2016
CCL20	IL6	0.0284774	Co-expression	Horiuchi-Sawa-2016
PTGS2	CXCL3	0.0141432	Co-expression	Horiuchi-Sawa-2016
PTGS2	CXCL1	0.0094911	Co-expression	Horiuchi-Sawa-2016
PTGS2	CXCL2	0.0211322	Co-expression	Horiuchi-Sawa-2016
PTGS2	CCL20	0.0157735	Co-expression	Horiuchi-Sawa-2016
BARD1	NFKB1	0.00961404	Co-expression	Horiuchi-Sawa-2016
CSF3	IL6	0.0114096	Co-expression	Horiuchi-Sawa-2016
FPR1	CSF3	0.0132301	Co-expression	Horiuchi-Sawa-2016
IL17RA	NFKB1	0.00856315	Co-expression	Horiuchi-Sawa-2016
IL4	IL2	0.0151594	Co-expression	Chibon-Aurias-2010
IL4	IL17	0.0133536	Co-expression	Chibon-Aurias-2010
IL12B	IL10	0.0290384	Co-expression	Chibon-Aurias-2010
BRCA2	BRCA1	0.0173757	Co-expression	Chibon-Aurias-2010
IL1B	IL8	0.0114348	Co-expression	Chibon-Aurias-2010
IL6	IL8	0.00814946	Co-expression	Chibon-Aurias-2010
IL6	IL1B	0.0137528	Co-expression	Chibon-Aurias-2010
CXCR1	CXCR2	0.0246977	Co-expression	Chibon-Aurias-2010
TNF	IL1B	0.0133126	Co-expression	Chibon-Aurias-2010
NFKB1	IFNG	0.00495372	Co-expression	Chibon-Aurias-2010
NFKB1	IL8	0.00358669	Co-expression	Chibon-Aurias-2010
NFKB1	IL1B	0.00408853	Co-expression	Chibon-Aurias-2010
NFKB1	IL6	0.00428336	Co-expression	Chibon-Aurias-2010
NFKB1	TNF	0.00401424	Co-expression	Chibon-Aurias-2010
IL12A	IFNG	0.0138848	Co-expression	Chibon-Aurias-2010
IL12A	NFKB1	0.00412503	Co-expression	Chibon-Aurias-2010
IL10RA	IL10	0.00499365	Co-expression	Chibon-Aurias-2010
CXCL3	IFNG	0.00749546	Co-expression	Chibon-Aurias-2010
CXCL3	IL8	0.00729421	Co-expression	Chibon-Aurias-2010
CXCL3	IL1B	0.0096879	Co-expression	Chibon-Aurias-2010
CXCL3	IL6	0.00837359	Co-expression	Chibon-Aurias-2010
CXCL3	NFKB1	0.00332371	Co-expression	Chibon-Aurias-2010
CCL4	IL1B	0.0174694	Co-expression	Chibon-Aurias-2010
CCL4	IL6	0.00825658	Co-expression	Chibon-Aurias-2010
CCL4	TNF	0.017563	Co-expression	Chibon-Aurias-2010
CXCL1	IFNG	0.00672893	Co-expression	Chibon-Aurias-2010
CXCL1	IL8	0.00680078	Co-expression	Chibon-Aurias-2010
CXCL1	IL1B	0.00943183	Co-expression	Chibon-Aurias-2010
CXCL1	IL6	0.00763291	Co-expression	Chibon-Aurias-2010
CXCL1	TNF	0.00694456	Co-expression	Chibon-Aurias-2010
CXCL1	NFKB1	0.00338364	Co-expression	Chibon-Aurias-2010
CXCL1	IL12A	0.00660851	Co-expression	Chibon-Aurias-2010
CXCL1	CXCL3	0.00665016	Co-expression	Chibon-Aurias-2010
CXCL1	CCL4	0.00625283	Co-expression	Chibon-Aurias-2010
CXCL2	IL8	0.0121869	Co-expression	Chibon-Aurias-2010
CXCL2	IL1B	0.0142501	Co-expression	Chibon-Aurias-2010
CXCL2	IL6	0.0125948	Co-expression	Chibon-Aurias-2010
CXCL2	NFKB1	0.00657293	Co-expression	Chibon-Aurias-2010
CXCL2	CXCL3	0.0110321	Co-expression	Chibon-Aurias-2010
CXCL2	CXCL1	0.0108208	Co-expression	Chibon-Aurias-2010
CCL20	IL8	0.00775543	Co-expression	Chibon-Aurias-2010
CCL20	IL1B	0.0194961	Co-expression	Chibon-Aurias-2010
CCL20	IL6	0.0103724	Co-expression	Chibon-Aurias-2010
CCL20	CXCL3	0.00749693	Co-expression	Chibon-Aurias-2010
PTGS2	IL12B	0.0080185	Co-expression	Chibon-Aurias-2010
PTGS2	IL6	0.00749542	Co-expression	Chibon-Aurias-2010
PTGS2	TNF	0.00910407	Co-expression	Chibon-Aurias-2010
PTGS2	NFKB1	0.00400964	Co-expression	Chibon-Aurias-2010
PTGS2	CXCL1	0.00488303	Co-expression	Chibon-Aurias-2010
PTGS2	CXCL2	0.010615	Co-expression	Chibon-Aurias-2010
NLRP7	IL17	0.0431737	Co-expression	Chibon-Aurias-2010
HCAR3	CXCR2	0.0128669	Co-expression	Chibon-Aurias-2010
HCAR3	IL8	0.00973193	Co-expression	Chibon-Aurias-2010
HCAR3	IL1B	0.0111775	Co-expression	Chibon-Aurias-2010
HCAR3	CXCR1	0.0128425	Co-expression	Chibon-Aurias-2010
HCAR3	CCL20	0.00982467	Co-expression	Chibon-Aurias-2010
IL1A	IL8	0.00984741	Co-expression	Chibon-Aurias-2010
IL1A	IL1B	0.018024	Co-expression	Chibon-Aurias-2010
IL1A	IL6	0.01098	Co-expression	Chibon-Aurias-2010
IL1A	CXCL3	0.00846434	Co-expression	Chibon-Aurias-2010
IL1A	CXCL1	0.00624686	Co-expression	Chibon-Aurias-2010
IL1A	CCL20	0.0244878	Co-expression	Chibon-Aurias-2010
IL1A	HCAR3	0.0138797	Co-expression	Chibon-Aurias-2010
PROK2	CXCR2	0.022018	Co-expression	Chibon-Aurias-2010
PROK2	CXCR1	0.0224644	Co-expression	Chibon-Aurias-2010
PROK2	HCAR3	0.0154378	Co-expression	Chibon-Aurias-2010
CSF3	IFNG	0.00614403	Co-expression	Chibon-Aurias-2010
CSF3	IL8	0.00387022	Co-expression	Chibon-Aurias-2010
CSF3	IL6	0.00439653	Co-expression	Chibon-Aurias-2010
CSF3	NFKB1	0.00286978	Co-expression	Chibon-Aurias-2010
CSF3	IL12A	0.00640278	Co-expression	Chibon-Aurias-2010
CSF3	CXCL3	0.00440713	Co-expression	Chibon-Aurias-2010
CSF3	CXCL1	0.00397842	Co-expression	Chibon-Aurias-2010
CSF3	CXCL2	0.0082139	Co-expression	Chibon-Aurias-2010
CSF3	PTGS2	0.00411598	Co-expression	Chibon-Aurias-2010
OSM	IL12B	0.0123012	Co-expression	Chibon-Aurias-2010
OSM	CXCR2	0.011128	Co-expression	Chibon-Aurias-2010
OSM	IL1B	0.0113365	Co-expression	Chibon-Aurias-2010
OSM	CCL20	0.0125436	Co-expression	Chibon-Aurias-2010
OSM	HCAR3	0.013785	Co-expression	Chibon-Aurias-2010
OSM	IL1A	0.0160747	Co-expression	Chibon-Aurias-2010
OSM	PROK2	0.0140438	Co-expression	Chibon-Aurias-2010
FPR1	CXCR2	0.014976	Co-expression	Chibon-Aurias-2010
FPR1	IL1B	0.013689	Co-expression	Chibon-Aurias-2010
FPR1	CXCR1	0.0142263	Co-expression	Chibon-Aurias-2010
FPR1	CCL20	0.0149803	Co-expression	Chibon-Aurias-2010
FPR1	HCAR3	0.0127433	Co-expression	Chibon-Aurias-2010
FPR1	IL1A	0.0149612	Co-expression	Chibon-Aurias-2010
FPR1	PROK2	0.0163384	Co-expression	Chibon-Aurias-2010
FPR1	OSM	0.01653	Co-expression	Chibon-Aurias-2010
TNFAIP3	IL8	0.00475758	Co-expression	Chibon-Aurias-2010
TNFAIP3	IL1B	0.00761785	Co-expression	Chibon-Aurias-2010
TNFAIP3	IL6	0.00582894	Co-expression	Chibon-Aurias-2010
TNFAIP3	TNF	0.00766525	Co-expression	Chibon-Aurias-2010
TNFAIP3	NFKB1	0.00331313	Co-expression	Chibon-Aurias-2010
TNFAIP3	CXCL3	0.0036442	Co-expression	Chibon-Aurias-2010
TNFAIP3	CCL4	0.00805548	Co-expression	Chibon-Aurias-2010
TNFAIP3	CXCL1	0.00402779	Co-expression	Chibon-Aurias-2010
TNFAIP3	CXCL2	0.00880419	Co-expression	Chibon-Aurias-2010
TNFAIP3	PTGS2	0.0057811	Co-expression	Chibon-Aurias-2010
IL5	IL4	0.017321	Co-expression	Singh-Celli-2011
IL13	IL4	0.026925	Co-expression	Singh-Celli-2011
IL13	IL5	0.0193137	Co-expression	Singh-Celli-2011
IL6	IL10	0.00917666	Co-expression	Singh-Celli-2011
CXCR1	CXCR2	0.00729428	Co-expression	Singh-Celli-2011
TNF	IL10	0.0080324	Co-expression	Singh-Celli-2011
TNF	IL12B	0.00800049	Co-expression	Singh-Celli-2011
TNF	IL1B	0.0126504	Co-expression	Singh-Celli-2011
TNF	IL6	0.0105115	Co-expression	Singh-Celli-2011
NFKB1	IL12B	0.00376071	Co-expression	Singh-Celli-2011
NFKB1	IL1B	0.00539998	Co-expression	Singh-Celli-2011
NFKB1	IL6	0.00382864	Co-expression	Singh-Celli-2011
NFKB1	TNF	0.00483682	Co-expression	Singh-Celli-2011
IL10RA	NFKB1	0.00443454	Co-expression	Singh-Celli-2011
CXCL3	IL10	0.0113883	Co-expression	Singh-Celli-2011
CXCL3	IL6	0.0142365	Co-expression	Singh-Celli-2011
CXCL3	TNF	0.0134926	Co-expression	Singh-Celli-2011
CXCL3	NFKB1	0.00483941	Co-expression	Singh-Celli-2011
CCL4	IL6	0.00984851	Co-expression	Singh-Celli-2011
CCL4	TNF	0.0133455	Co-expression	Singh-Celli-2011
CCL4	NFKB1	0.00634142	Co-expression	Singh-Celli-2011
CCL4	CXCL3	0.0146159	Co-expression	Singh-Celli-2011
CXCL1	IL8	0.0213876	Co-expression	Singh-Celli-2011
CXCL1	IL1B	0.0147971	Co-expression	Singh-Celli-2011
CXCL2	IL6	0.00980334	Co-expression	Singh-Celli-2011
CXCL2	TNF	0.0113717	Co-expression	Singh-Celli-2011
CXCL2	NFKB1	0.00511341	Co-expression	Singh-Celli-2011
CXCL2	CXCL3	0.0172696	Co-expression	Singh-Celli-2011
CXCL2	CCL4	0.0135939	Co-expression	Singh-Celli-2011
CCL20	IL10	0.0110211	Co-expression	Singh-Celli-2011
CCL20	IL6	0.0106991	Co-expression	Singh-Celli-2011
CCL20	TNF	0.0121423	Co-expression	Singh-Celli-2011
CCL20	NFKB1	0.00531914	Co-expression	Singh-Celli-2011
CCL20	CXCL3	0.0199493	Co-expression	Singh-Celli-2011
CCL20	CCL4	0.0154621	Co-expression	Singh-Celli-2011
CCL20	CXCL2	0.014322	Co-expression	Singh-Celli-2011
PTGS2	IL8	0.0149447	Co-expression	Singh-Celli-2011
PTGS2	IL1B	0.0149718	Co-expression	Singh-Celli-2011
PTGS2	TNF	0.00876662	Co-expression	Singh-Celli-2011
PTGS2	CXCL1	0.0126247	Co-expression	Singh-Celli-2011
NLRP7	IL12A	0.0143772	Co-expression	Singh-Celli-2011
HCAR3	IL8	0.0271931	Co-expression	Singh-Celli-2011
HCAR3	IL1B	0.0205484	Co-expression	Singh-Celli-2011
HCAR3	CXCL1	0.0202933	Co-expression	Singh-Celli-2011
HCAR3	PTGS2	0.0159729	Co-expression	Singh-Celli-2011
IL1A	TNF	0.0158139	Co-expression	Singh-Celli-2011
IL1A	NFKB1	0.00698258	Co-expression	Singh-Celli-2011
PROK2	CXCR2	0.00692781	Co-expression	Singh-Celli-2011
PROK2	IL1B	0.0109014	Co-expression	Singh-Celli-2011
PROK2	CXCL1	0.0107683	Co-expression	Singh-Celli-2011
PROK2	PTGS2	0.00911069	Co-expression	Singh-Celli-2011
PROK2	HCAR3	0.0149575	Co-expression	Singh-Celli-2011
CSF3	IL10	0.00778253	Co-expression	Singh-Celli-2011
CSF3	IL6	0.00667724	Co-expression	Singh-Celli-2011
CSF3	CXCL3	0.00825319	Co-expression	Singh-Celli-2011
CSF3	CXCL2	0.0073207	Co-expression	Singh-Celli-2011
CSF3	CCL20	0.00831504	Co-expression	Singh-Celli-2011
OSM	IL1B	0.0110246	Co-expression	Singh-Celli-2011
OSM	TNF	0.00680038	Co-expression	Singh-Celli-2011
OSM	CXCL1	0.00912819	Co-expression	Singh-Celli-2011
OSM	PTGS2	0.00886029	Co-expression	Singh-Celli-2011
OSM	HCAR3	0.0124154	Co-expression	Singh-Celli-2011
OSM	IL23A	0.0108394	Co-expression	Singh-Celli-2011
OSM	PROK2	0.00666667	Co-expression	Singh-Celli-2011
FPR1	CXCR2	0.00640203	Co-expression	Singh-Celli-2011
FPR1	CXCR1	0.00564381	Co-expression	Singh-Celli-2011
TNFAIP3	IL10	0.00585217	Co-expression	Singh-Celli-2011
TNFAIP3	IL6	0.00515711	Co-expression	Singh-Celli-2011
TNFAIP3	TNF	0.00626489	Co-expression	Singh-Celli-2011
TNFAIP3	NFKB1	0.00307426	Co-expression	Singh-Celli-2011
TNFAIP3	CXCL3	0.00704941	Co-expression	Singh-Celli-2011
TNFAIP3	CCL4	0.00830379	Co-expression	Singh-Celli-2011
TNFAIP3	CXCL1	0.00722984	Co-expression	Singh-Celli-2011
TNFAIP3	CXCL2	0.00686329	Co-expression	Singh-Celli-2011
TNFAIP3	CCL20	0.00897613	Co-expression	Singh-Celli-2011
TNFAIP3	IL1A	0.0110183	Co-expression	Singh-Celli-2011
TNFAIP3	CSF3	0.00423667	Co-expression	Singh-Celli-2011
IL4	IL2	0.00408074	Co-expression	An-Zhang-2015
IL5	IL4	0.00634159	Co-expression	An-Zhang-2015
IL12B	IL2	0.0223676	Co-expression	An-Zhang-2015
IL12B	IL4	0.00490371	Co-expression	An-Zhang-2015
BRCA2	BRCA1	0.0045436	Co-expression	An-Zhang-2015
IL8	CXCR2	0.0198884	Co-expression	An-Zhang-2015
IL13	IL4	0.00574841	Co-expression	An-Zhang-2015
IL13	IL5	0.0402369	Co-expression	An-Zhang-2015
IL1B	IL8	0.0168428	Co-expression	An-Zhang-2015
IL6	IL8	0.0159412	Co-expression	An-Zhang-2015
CXCR1	CXCR2	0.019876	Co-expression	An-Zhang-2015
CXCR1	IL8	0.0139359	Co-expression	An-Zhang-2015
TNF	IL10	0.014925	Co-expression	An-Zhang-2015
IL10RA	IL10	0.00723425	Co-expression	An-Zhang-2015
CXCL3	IL1B	0.00674024	Co-expression	An-Zhang-2015
CCL4	IFNG	0.015852	Co-expression	An-Zhang-2015
CCL4	TNF	0.0208481	Co-expression	An-Zhang-2015
CXCL1	IL1B	0.00780854	Co-expression	An-Zhang-2015
CXCL1	CXCL3	0.00500112	Co-expression	An-Zhang-2015
CXCL2	IL1B	0.00829905	Co-expression	An-Zhang-2015
CXCL2	CXCL3	0.00570636	Co-expression	An-Zhang-2015
CXCL2	CXCL1	0.00593206	Co-expression	An-Zhang-2015
CCL20	IL1B	0.00919636	Co-expression	An-Zhang-2015
CCL20	CXCL3	0.00568163	Co-expression	An-Zhang-2015
CCL20	CXCL1	0.00599044	Co-expression	An-Zhang-2015
CCL20	CXCL2	0.00661057	Co-expression	An-Zhang-2015
PTGS2	IL8	0.0224009	Co-expression	An-Zhang-2015
PTGS2	IL1B	0.016756	Co-expression	An-Zhang-2015
PTGS2	IL6	0.0159007	Co-expression	An-Zhang-2015
PTGS2	CXCL3	0.00634275	Co-expression	An-Zhang-2015
PTGS2	CXCL1	0.00696099	Co-expression	An-Zhang-2015
PTGS2	CXCL2	0.00809694	Co-expression	An-Zhang-2015
HCAR3	CXCR2	0.0181675	Co-expression	An-Zhang-2015
HCAR3	IL8	0.0228522	Co-expression	An-Zhang-2015
HCAR3	IL6	0.0140648	Co-expression	An-Zhang-2015
HCAR3	CXCR1	0.0131777	Co-expression	An-Zhang-2015
HCAR3	PTGS2	0.0151413	Co-expression	An-Zhang-2015
IL1A	IL8	0.0230006	Co-expression	An-Zhang-2015
IL1A	IL1B	0.0211952	Co-expression	An-Zhang-2015
IL1A	CXCL3	0.00743462	Co-expression	An-Zhang-2015
IL1A	CXCL1	0.00883072	Co-expression	An-Zhang-2015
IL1A	CXCL2	0.00866812	Co-expression	An-Zhang-2015
IL1A	CCL20	0.00895289	Co-expression	An-Zhang-2015
IL1A	PTGS2	0.0190008	Co-expression	An-Zhang-2015
IL23A	IL1B	0.0167418	Co-expression	An-Zhang-2015
IL23A	CXCL3	0.00809048	Co-expression	An-Zhang-2015
IL23A	CXCL1	0.00889434	Co-expression	An-Zhang-2015
IL23A	CXCL2	0.00987171	Co-expression	An-Zhang-2015
IL23A	CCL20	0.00984483	Co-expression	An-Zhang-2015
IL23A	IL1A	0.0210943	Co-expression	An-Zhang-2015
PROK2	CXCR2	0.021673	Co-expression	An-Zhang-2015
PROK2	IL8	0.0233487	Co-expression	An-Zhang-2015
PROK2	CXCR1	0.0178688	Co-expression	An-Zhang-2015
PROK2	HCAR3	0.022756	Co-expression	An-Zhang-2015
CSF3	CXCR2	0.0138907	Co-expression	An-Zhang-2015
CSF3	IL8	0.0215014	Co-expression	An-Zhang-2015
CSF3	IL1B	0.0131655	Co-expression	An-Zhang-2015
CSF3	IL6	0.0154589	Co-expression	An-Zhang-2015
CSF3	CXCL3	0.00578931	Co-expression	An-Zhang-2015
CSF3	CXCL1	0.00651345	Co-expression	An-Zhang-2015
CSF3	CXCL2	0.00767753	Co-expression	An-Zhang-2015
CSF3	PTGS2	0.0172277	Co-expression	An-Zhang-2015
CSF3	IL1A	0.0167652	Co-expression	An-Zhang-2015
CSF3	IL23A	0.0153841	Co-expression	An-Zhang-2015
CSF3	PROK2	0.0145119	Co-expression	An-Zhang-2015
OSM	CXCR2	0.0129556	Co-expression	An-Zhang-2015
OSM	IL8	0.0155493	Co-expression	An-Zhang-2015
OSM	IL1B	0.0116497	Co-expression	An-Zhang-2015
OSM	IL6	0.0119412	Co-expression	An-Zhang-2015
OSM	CXCR1	0.00981422	Co-expression	An-Zhang-2015
OSM	CCL4	0.0114608	Co-expression	An-Zhang-2015
OSM	PTGS2	0.0138206	Co-expression	An-Zhang-2015
OSM	HCAR3	0.0159332	Co-expression	An-Zhang-2015
OSM	PROK2	0.0138444	Co-expression	An-Zhang-2015
OSM	CSF3	0.0106701	Co-expression	An-Zhang-2015
FPR1	CXCR2	0.0161805	Co-expression	An-Zhang-2015
FPR1	IL8	0.0117086	Co-expression	An-Zhang-2015
FPR1	CXCR1	0.0114849	Co-expression	An-Zhang-2015
FPR1	HCAR3	0.0156545	Co-expression	An-Zhang-2015
FPR1	PROK2	0.0153321	Co-expression	An-Zhang-2015
FPR1	OSM	0.0107053	Co-expression	An-Zhang-2015
TNFAIP3	TNF	0.0163958	Co-expression	An-Zhang-2015
TNFAIP3	CCL4	0.0130574	Co-expression	An-Zhang-2015
TNFAIP3	CXCL2	0.00721644	Co-expression	An-Zhang-2015
TNFAIP3	CSF3	0.0138616	Co-expression	An-Zhang-2015
TNFAIP3	OSM	0.0103764	Co-expression	An-Zhang-2015
BRCA2	BRCA1	0.0223949	Co-expression	Der-Tsao-2014
IL8	CXCR2	0.0199214	Co-expression	Der-Tsao-2014
IL13	IL5	0.00328744	Co-expression	Der-Tsao-2014
IL1B	CXCR2	0.0197051	Co-expression	Der-Tsao-2014
IL1B	IL8	0.0195059	Co-expression	Der-Tsao-2014
IL6	IL8	0.0168319	Co-expression	Der-Tsao-2014
IL6	IL1B	0.0180088	Co-expression	Der-Tsao-2014
CXCR1	CXCR2	0.0176956	Co-expression	Der-Tsao-2014
TNF	IL10	0.0271801	Co-expression	Der-Tsao-2014
TNF	IL1B	0.020173	Co-expression	Der-Tsao-2014
TNF	CXCR1	0.0172144	Co-expression	Der-Tsao-2014
IL10RA	IL10	0.00593574	Co-expression	Der-Tsao-2014
CXCL3	CXCR2	0.0234495	Co-expression	Der-Tsao-2014
CXCL3	IL8	0.0200359	Co-expression	Der-Tsao-2014
CXCL3	IL1B	0.0174592	Co-expression	Der-Tsao-2014
CXCL3	IL6	0.0234886	Co-expression	Der-Tsao-2014
CCL4	IL10	0.0101989	Co-expression	Der-Tsao-2014
CCL4	IFNG	0.00832349	Co-expression	Der-Tsao-2014
CCL4	IL1B	0.00770261	Co-expression	Der-Tsao-2014
CCL4	TNF	0.00907807	Co-expression	Der-Tsao-2014
CXCL1	CXCR2	0.0258823	Co-expression	Der-Tsao-2014
CXCL1	IL8	0.0256601	Co-expression	Der-Tsao-2014
CXCL1	IL1B	0.0215053	Co-expression	Der-Tsao-2014
CXCL1	IL6	0.0213412	Co-expression	Der-Tsao-2014
CXCL1	CXCL3	0.026854	Co-expression	Der-Tsao-2014
CXCL2	IL6	0.0189258	Co-expression	Der-Tsao-2014
CXCL2	CXCL3	0.0291617	Co-expression	Der-Tsao-2014
CXCL2	CXCL1	0.018282	Co-expression	Der-Tsao-2014
CCL20	IL8	0.0185284	Co-expression	Der-Tsao-2014
CCL20	CXCL3	0.0241312	Co-expression	Der-Tsao-2014
CCL20	CXCL1	0.0188706	Co-expression	Der-Tsao-2014
CCL20	CXCL2	0.0241352	Co-expression	Der-Tsao-2014
PTGS2	IL8	0.0166168	Co-expression	Der-Tsao-2014
PTGS2	CXCL3	0.0242277	Co-expression	Der-Tsao-2014
HCAR3	CXCR2	0.0219107	Co-expression	Der-Tsao-2014
HCAR3	IL8	0.0205513	Co-expression	Der-Tsao-2014
HCAR3	IL1B	0.0185821	Co-expression	Der-Tsao-2014
HCAR3	IL6	0.0157879	Co-expression	Der-Tsao-2014
HCAR3	CXCL3	0.0159124	Co-expression	Der-Tsao-2014
HCAR3	CXCL1	0.0222741	Co-expression	Der-Tsao-2014
IL1A	IL1B	0.0188305	Co-expression	Der-Tsao-2014
PROK2	CXCR2	0.031838	Co-expression	Der-Tsao-2014
PROK2	IL8	0.0205933	Co-expression	Der-Tsao-2014
PROK2	IL1B	0.0234305	Co-expression	Der-Tsao-2014
PROK2	IL6	0.0184902	Co-expression	Der-Tsao-2014
PROK2	CXCR1	0.015742	Co-expression	Der-Tsao-2014
PROK2	CXCL3	0.0233207	Co-expression	Der-Tsao-2014
PROK2	CXCL1	0.0228419	Co-expression	Der-Tsao-2014
PROK2	HCAR3	0.0204655	Co-expression	Der-Tsao-2014
CSF3	IL6	0.021631	Co-expression	Der-Tsao-2014
CSF3	CXCL3	0.0215222	Co-expression	Der-Tsao-2014
CSF3	CXCL2	0.0214622	Co-expression	Der-Tsao-2014
CSF3	PROK2	0.026406	Co-expression	Der-Tsao-2014
OSM	IL6	0.0163614	Co-expression	Der-Tsao-2014
FPR1	CXCR2	0.0257131	Co-expression	Der-Tsao-2014
FPR1	IL1B	0.018534	Co-expression	Der-Tsao-2014
FPR1	CXCL3	0.015269	Co-expression	Der-Tsao-2014
FPR1	PROK2	0.024575	Co-expression	Der-Tsao-2014
TNFAIP3	CXCR2	0.013472	Co-expression	Der-Tsao-2014
TNFAIP3	IL1B	0.0109178	Co-expression	Der-Tsao-2014
TNFAIP3	IL6	0.0129776	Co-expression	Der-Tsao-2014
TNFAIP3	IL10RA	0.00363759	Co-expression	Der-Tsao-2014
TNFAIP3	CXCL3	0.0123513	Co-expression	Der-Tsao-2014
TNFAIP3	CCL4	0.00695641	Co-expression	Der-Tsao-2014
TNFAIP3	CXCL1	0.0123482	Co-expression	Der-Tsao-2014
TNFAIP3	CCL20	0.0144278	Co-expression	Der-Tsao-2014
TNFAIP3	NLRP7	0.013497	Co-expression	Der-Tsao-2014
TNFAIP3	PROK2	0.0114862	Co-expression	Der-Tsao-2014
IL13	IL5	0.00812323	Co-expression	Roth-Zlotnik-2006
IL6	IL8	0.0200218	Co-expression	Roth-Zlotnik-2006
IL6	IL1B	0.0259487	Co-expression	Roth-Zlotnik-2006
CXCR1	IL10	0.00999671	Co-expression	Roth-Zlotnik-2006
TNF	IFNG	0.0351315	Co-expression	Roth-Zlotnik-2006
TNF	IL1B	0.0275778	Co-expression	Roth-Zlotnik-2006
TNF	CXCR1	0.00766782	Co-expression	Roth-Zlotnik-2006
p53	NFKB1	0.0103981	Co-expression	Roth-Zlotnik-2006
IL10RA	IL7	0.00585415	Co-expression	Roth-Zlotnik-2006
CXCL3	IL6	0.021179	Co-expression	Roth-Zlotnik-2006
CCL4	IL1B	0.0273208	Co-expression	Roth-Zlotnik-2006
CCL4	IL10RA	0.00736069	Co-expression	Roth-Zlotnik-2006
CXCL1	CCL4	0.0233908	Co-expression	Roth-Zlotnik-2006
CXCL2	IL6	0.022649	Co-expression	Roth-Zlotnik-2006
CXCL2	CXCL3	0.0239574	Co-expression	Roth-Zlotnik-2006
CCL20	CXCL3	0.0270991	Co-expression	Roth-Zlotnik-2006
PTGS2	IL8	0.0205561	Co-expression	Roth-Zlotnik-2006
PTGS2	IL6	0.0320864	Co-expression	Roth-Zlotnik-2006
BARD1	NFKB1	0.0138537	Co-expression	Roth-Zlotnik-2006
BARD1	p53	0.0219493	Co-expression	Roth-Zlotnik-2006
NLRP7	IL13	0.00620254	Co-expression	Roth-Zlotnik-2006
HCAR3	CXCR2	0.0194493	Co-expression	Roth-Zlotnik-2006
HCAR3	IL8	0.0179796	Co-expression	Roth-Zlotnik-2006
IL1A	CXCR2	0.0216587	Co-expression	Roth-Zlotnik-2006
IL23A	IL13	0.0124727	Co-expression	Roth-Zlotnik-2006
PROK2	IL8	0.0202333	Co-expression	Roth-Zlotnik-2006
CSF3	IL6	0.0269653	Co-expression	Roth-Zlotnik-2006
CSF3	CXCL2	0.0209602	Co-expression	Roth-Zlotnik-2006
CSF3	PTGS2	0.0236848	Co-expression	Roth-Zlotnik-2006
OSM	PROK2	0.0197517	Co-expression	Roth-Zlotnik-2006
FPR1	IL8	0.0190207	Co-expression	Roth-Zlotnik-2006
FPR1	OSM	0.0197652	Co-expression	Roth-Zlotnik-2006
TNFAIP3	IL6	0.0183416	Co-expression	Roth-Zlotnik-2006
TNFAIP3	CXCL3	0.0129565	Co-expression	Roth-Zlotnik-2006
TNFAIP3	PTGS2	0.018279	Co-expression	Roth-Zlotnik-2006
TNFAIP3	CSF3	0.0111759	Co-expression	Roth-Zlotnik-2006
IL12B	IL2	0.023832	Co-expression	Okayama-Yokota-2012
BRCA2	BRCA1	0.0227687	Co-expression	Okayama-Yokota-2012
IL13	IL5	0.0182093	Co-expression	Okayama-Yokota-2012
IL1B	CXCR2	0.0147577	Co-expression	Okayama-Yokota-2012
IL1B	IL8	0.018743	Co-expression	Okayama-Yokota-2012
CXCR1	CXCR2	0.0332699	Co-expression	Okayama-Yokota-2012
CXCR1	IL6	0.00917985	Co-expression	Okayama-Yokota-2012
TNF	IL1B	0.0209393	Co-expression	Okayama-Yokota-2012
IL10RA	IL10	0.00581913	Co-expression	Okayama-Yokota-2012
CXCL3	CXCR2	0.01364	Co-expression	Okayama-Yokota-2012
CXCL3	IL6	0.00932479	Co-expression	Okayama-Yokota-2012
CXCL3	CXCR1	0.016394	Co-expression	Okayama-Yokota-2012
CXCL3	TNF	0.0181437	Co-expression	Okayama-Yokota-2012
CCL4	IL10	0.0186873	Co-expression	Okayama-Yokota-2012
CCL4	IFNG	0.0113631	Co-expression	Okayama-Yokota-2012
CCL4	IL1B	0.0153154	Co-expression	Okayama-Yokota-2012
CXCL1	IL8	0.018707	Co-expression	Okayama-Yokota-2012
CXCL1	IL1B	0.0177951	Co-expression	Okayama-Yokota-2012
CXCL1	CXCL3	0.0132648	Co-expression	Okayama-Yokota-2012
CXCL2	IL6	0.0104287	Co-expression	Okayama-Yokota-2012
CXCL2	CXCL3	0.0284097	Co-expression	Okayama-Yokota-2012
CCL20	IL8	0.0123935	Co-expression	Okayama-Yokota-2012
PTGS2	IL6	0.00843878	Co-expression	Okayama-Yokota-2012
HCAR3	CXCR2	0.0199278	Co-expression	Okayama-Yokota-2012
HCAR3	IL8	0.0160957	Co-expression	Okayama-Yokota-2012
HCAR3	IL1B	0.0179186	Co-expression	Okayama-Yokota-2012
HCAR3	CXCR1	0.0220473	Co-expression	Okayama-Yokota-2012
HCAR3	CCL4	0.0155062	Co-expression	Okayama-Yokota-2012
IL23A	CCL20	0.0147337	Co-expression	Okayama-Yokota-2012
PROK2	CXCR2	0.0205894	Co-expression	Okayama-Yokota-2012
PROK2	IL6	0.00916747	Co-expression	Okayama-Yokota-2012
PROK2	CXCR1	0.0253065	Co-expression	Okayama-Yokota-2012
PROK2	CXCL3	0.0143434	Co-expression	Okayama-Yokota-2012
PROK2	HCAR3	0.0142882	Co-expression	Okayama-Yokota-2012
CSF3	IL6	0.00914703	Co-expression	Okayama-Yokota-2012
CSF3	CXCL3	0.0194567	Co-expression	Okayama-Yokota-2012
CSF3	CXCL2	0.0192336	Co-expression	Okayama-Yokota-2012
CSF3	PTGS2	0.0114179	Co-expression	Okayama-Yokota-2012
CSF3	PROK2	0.0140622	Co-expression	Okayama-Yokota-2012
OSM	IL1B	0.0206905	Co-expression	Okayama-Yokota-2012
OSM	IL6	0.0107019	Co-expression	Okayama-Yokota-2012
OSM	CCL4	0.0142914	Co-expression	Okayama-Yokota-2012
FPR1	CXCR2	0.0225327	Co-expression	Okayama-Yokota-2012
FPR1	IL1B	0.019178	Co-expression	Okayama-Yokota-2012
FPR1	IL6	0.00816433	Co-expression	Okayama-Yokota-2012
FPR1	CXCR1	0.0257601	Co-expression	Okayama-Yokota-2012
FPR1	HCAR3	0.0201656	Co-expression	Okayama-Yokota-2012
FPR1	PROK2	0.0168055	Co-expression	Okayama-Yokota-2012
IL17RA	IL10RA	0.00597862	Co-expression	Okayama-Yokota-2012
TNFAIP3	IL2	0.0125701	Co-expression	Okayama-Yokota-2012
TNFAIP3	IL1B	0.00909039	Co-expression	Okayama-Yokota-2012
TNFAIP3	TNF	0.0112188	Co-expression	Okayama-Yokota-2012
TNFAIP3	IL10RA	0.00321556	Co-expression	Okayama-Yokota-2012
TNFAIP3	CXCL3	0.0101861	Co-expression	Okayama-Yokota-2012
TNFAIP3	CCL4	0.00982541	Co-expression	Okayama-Yokota-2012
TNFAIP3	CXCL2	0.0113883	Co-expression	Okayama-Yokota-2012
TNFAIP3	OSM	0.0119667	Co-expression	Okayama-Yokota-2012
IL4	IL2	0.0082444	Co-expression	Micke-Botling-2011
IL8	CXCR2	0.0126762	Co-expression	Micke-Botling-2011
IL13	IL5	0.0225511	Co-expression	Micke-Botling-2011
IL1B	CXCR2	0.0144938	Co-expression	Micke-Botling-2011
IL1B	IL8	0.0126598	Co-expression	Micke-Botling-2011
IL6	IL8	0.0162332	Co-expression	Micke-Botling-2011
IL6	IL1B	0.0176047	Co-expression	Micke-Botling-2011
CXCR1	CXCR2	0.0181816	Co-expression	Micke-Botling-2011
CXCR1	IL8	0.0125785	Co-expression	Micke-Botling-2011
TNF	IL10	0.0191558	Co-expression	Micke-Botling-2011
TNF	CXCR2	0.0192157	Co-expression	Micke-Botling-2011
NFKB1	IL7	0.00552643	Co-expression	Micke-Botling-2011
CXCL3	CXCR2	0.0145243	Co-expression	Micke-Botling-2011
CXCL3	IL8	0.0168112	Co-expression	Micke-Botling-2011
CXCL3	IL1B	0.0144042	Co-expression	Micke-Botling-2011
CXCL3	IL6	0.0229847	Co-expression	Micke-Botling-2011
CCL4	IFNG	0.00717094	Co-expression	Micke-Botling-2011
CCL4	IL10RA	0.00326999	Co-expression	Micke-Botling-2011
CXCL1	CXCR2	0.0184025	Co-expression	Micke-Botling-2011
CXCL1	IL8	0.0183518	Co-expression	Micke-Botling-2011
CXCL1	IL1B	0.0129541	Co-expression	Micke-Botling-2011
CXCL1	IL6	0.0171462	Co-expression	Micke-Botling-2011
CXCL1	CXCR1	0.0129264	Co-expression	Micke-Botling-2011
CXCL1	TNF	0.0155573	Co-expression	Micke-Botling-2011
CXCL1	CXCL3	0.019989	Co-expression	Micke-Botling-2011
CXCL2	CXCL3	0.0265951	Co-expression	Micke-Botling-2011
CCL20	CXCR2	0.0152853	Co-expression	Micke-Botling-2011
CCL20	IL8	0.018301	Co-expression	Micke-Botling-2011
CCL20	IL6	0.0207954	Co-expression	Micke-Botling-2011
CCL20	CXCL3	0.0252375	Co-expression	Micke-Botling-2011
CCL20	CXCL1	0.0193361	Co-expression	Micke-Botling-2011
PTGS2	IL8	0.0106646	Co-expression	Micke-Botling-2011
PTGS2	CXCL3	0.0128456	Co-expression	Micke-Botling-2011
PTGS2	CXCL2	0.0166058	Co-expression	Micke-Botling-2011
PTGS2	CCL20	0.0137343	Co-expression	Micke-Botling-2011
NLRP7	IL1B	0.0195488	Co-expression	Micke-Botling-2011
HCAR3	CXCR2	0.0127747	Co-expression	Micke-Botling-2011
HCAR3	IL8	0.013747	Co-expression	Micke-Botling-2011
HCAR3	CXCL1	0.0123594	Co-expression	Micke-Botling-2011
IL1A	IL1B	0.0176812	Co-expression	Micke-Botling-2011
PROK2	CXCR2	0.0182286	Co-expression	Micke-Botling-2011
PROK2	IL8	0.0137281	Co-expression	Micke-Botling-2011
PROK2	IL6	0.017522	Co-expression	Micke-Botling-2011
PROK2	CXCR1	0.0200781	Co-expression	Micke-Botling-2011
PROK2	CXCL3	0.018486	Co-expression	Micke-Botling-2011
PROK2	CXCL1	0.0184397	Co-expression	Micke-Botling-2011
CSF3	IL6	0.0216426	Co-expression	Micke-Botling-2011
CSF3	TNF	0.0205586	Co-expression	Micke-Botling-2011
CSF3	CXCL3	0.0223896	Co-expression	Micke-Botling-2011
CSF3	CXCL1	0.0156473	Co-expression	Micke-Botling-2011
CSF3	CCL20	0.0256133	Co-expression	Micke-Botling-2011
CSF3	PROK2	0.0233536	Co-expression	Micke-Botling-2011
OSM	IL1B	0.0168703	Co-expression	Micke-Botling-2011
OSM	NFKB1	0.0109819	Co-expression	Micke-Botling-2011
FPR1	CXCR2	0.0178947	Co-expression	Micke-Botling-2011
FPR1	IL8	0.0156976	Co-expression	Micke-Botling-2011
FPR1	IL1B	0.0156063	Co-expression	Micke-Botling-2011
FPR1	IL6	0.0191212	Co-expression	Micke-Botling-2011
FPR1	CXCL1	0.0169032	Co-expression	Micke-Botling-2011
TNFAIP3	IL1B	0.0127682	Co-expression	Micke-Botling-2011
TNFAIP3	IL6	0.0145079	Co-expression	Micke-Botling-2011
TNFAIP3	CXCL3	0.0121958	Co-expression	Micke-Botling-2011
TNFAIP3	CCL4	0.00748315	Co-expression	Micke-Botling-2011
TNFAIP3	CXCL1	0.010941	Co-expression	Micke-Botling-2011
TNFAIP3	NLRP7	0.0119562	Co-expression	Micke-Botling-2011
TNFAIP3	IL1A	0.0126516	Co-expression	Micke-Botling-2011
TNFAIP3	OSM	0.0137924	Co-expression	Micke-Botling-2011
TNFAIP3	FPR1	0.0138332	Co-expression	Micke-Botling-2011
IL8	IFNG	0.0217459	Co-expression	Moffatt-Cookson-2007
IL1B	IL4	0.014875	Co-expression	Moffatt-Cookson-2007
IL6	IL12B	0.0196816	Co-expression	Moffatt-Cookson-2007
IL6	IL13	0.0169873	Co-expression	Moffatt-Cookson-2007
IL6	IL1B	0.0137002	Co-expression	Moffatt-Cookson-2007
TNF	IL12B	0.0190861	Co-expression	Moffatt-Cookson-2007
IL10RA	IL12B	0.00895196	Co-expression	Moffatt-Cookson-2007
CCL4	NFKB1	0.0182921	Co-expression	Moffatt-Cookson-2007
CCL20	IL6	0.0220723	Co-expression	Moffatt-Cookson-2007
IL1A	IL7	0.0106597	Co-expression	Moffatt-Cookson-2007
CSF3	IL13	0.0154914	Co-expression	Moffatt-Cookson-2007
TNFAIP3	IL12B	0.00759993	Co-expression	Moffatt-Cookson-2007
TNFAIP3	IL1A	0.00994439	Co-expression	Moffatt-Cookson-2007
BRCA2	BRCA1	0.0179881	Co-expression	Stirewalt-Radich-2008
IL1B	IL8	0.0100747	Co-expression	Stirewalt-Radich-2008
IL6	IL1B	0.0130014	Co-expression	Stirewalt-Radich-2008
CXCR1	CXCR2	0.0326718	Co-expression	Stirewalt-Radich-2008
TNF	IL8	0.0146573	Co-expression	Stirewalt-Radich-2008
TNF	IL1B	0.0150982	Co-expression	Stirewalt-Radich-2008
TNF	IL6	0.0158443	Co-expression	Stirewalt-Radich-2008
NFKB1	IL8	0.015633	Co-expression	Stirewalt-Radich-2008
NFKB1	IL13	0.0181677	Co-expression	Stirewalt-Radich-2008
NFKB1	IL1B	0.00910143	Co-expression	Stirewalt-Radich-2008
NFKB1	TNF	0.0165536	Co-expression	Stirewalt-Radich-2008
CXCL3	IL8	0.0171124	Co-expression	Stirewalt-Radich-2008
CXCL3	IL1B	0.0141618	Co-expression	Stirewalt-Radich-2008
CXCL3	IL6	0.0176671	Co-expression	Stirewalt-Radich-2008
CXCL3	TNF	0.020267	Co-expression	Stirewalt-Radich-2008
CXCL3	NFKB1	0.01428	Co-expression	Stirewalt-Radich-2008
CCL4	IL8	0.0110565	Co-expression	Stirewalt-Radich-2008
CCL4	IL1B	0.0133253	Co-expression	Stirewalt-Radich-2008
CCL4	IL6	0.0151442	Co-expression	Stirewalt-Radich-2008
CCL4	TNF	0.0195227	Co-expression	Stirewalt-Radich-2008
CCL4	NFKB1	0.0115769	Co-expression	Stirewalt-Radich-2008
CCL4	CXCL3	0.0163355	Co-expression	Stirewalt-Radich-2008
CXCL1	IL10	0.011561	Co-expression	Stirewalt-Radich-2008
CXCL1	IL8	0.0120506	Co-expression	Stirewalt-Radich-2008
CXCL1	IL1B	0.0095654	Co-expression	Stirewalt-Radich-2008
CXCL1	TNF	0.0128336	Co-expression	Stirewalt-Radich-2008
CXCL1	CXCL3	0.0141529	Co-expression	Stirewalt-Radich-2008
CXCL1	CCL4	0.0109241	Co-expression	Stirewalt-Radich-2008
CXCL2	IL8	0.0164833	Co-expression	Stirewalt-Radich-2008
CXCL2	IL1B	0.0121394	Co-expression	Stirewalt-Radich-2008
CXCL2	IL6	0.0131598	Co-expression	Stirewalt-Radich-2008
CXCL2	TNF	0.0170292	Co-expression	Stirewalt-Radich-2008
CXCL2	NFKB1	0.0136752	Co-expression	Stirewalt-Radich-2008
CXCL2	CXCL3	0.0196905	Co-expression	Stirewalt-Radich-2008
CXCL2	CCL4	0.0138935	Co-expression	Stirewalt-Radich-2008
CXCL2	CXCL1	0.0140603	Co-expression	Stirewalt-Radich-2008
CCL20	IL1B	0.0155067	Co-expression	Stirewalt-Radich-2008
CCL20	IL6	0.0194101	Co-expression	Stirewalt-Radich-2008
CCL20	TNF	0.0169151	Co-expression	Stirewalt-Radich-2008
CCL20	CXCL3	0.0210987	Co-expression	Stirewalt-Radich-2008
CCL20	CCL4	0.0176002	Co-expression	Stirewalt-Radich-2008
CCL20	CXCL2	0.0152092	Co-expression	Stirewalt-Radich-2008
PTGS2	IL10	0.00978131	Co-expression	Stirewalt-Radich-2008
PTGS2	IL8	0.0125317	Co-expression	Stirewalt-Radich-2008
PTGS2	IL1B	0.0109588	Co-expression	Stirewalt-Radich-2008
PTGS2	IL6	0.0124265	Co-expression	Stirewalt-Radich-2008
PTGS2	TNF	0.0129988	Co-expression	Stirewalt-Radich-2008
PTGS2	NFKB1	0.0103397	Co-expression	Stirewalt-Radich-2008
PTGS2	CXCL3	0.0155586	Co-expression	Stirewalt-Radich-2008
PTGS2	CCL4	0.0111995	Co-expression	Stirewalt-Radich-2008
PTGS2	CXCL1	0.013233	Co-expression	Stirewalt-Radich-2008
PTGS2	CXCL2	0.0140258	Co-expression	Stirewalt-Radich-2008
PTGS2	CCL20	0.0150924	Co-expression	Stirewalt-Radich-2008
HCAR3	IL8	0.0165666	Co-expression	Stirewalt-Radich-2008
HCAR3	IL1B	0.011178	Co-expression	Stirewalt-Radich-2008
HCAR3	TNF	0.0166649	Co-expression	Stirewalt-Radich-2008
HCAR3	CCL4	0.0121498	Co-expression	Stirewalt-Radich-2008
HCAR3	CXCL2	0.0122655	Co-expression	Stirewalt-Radich-2008
HCAR3	PTGS2	0.0113616	Co-expression	Stirewalt-Radich-2008
IL1A	IL1B	0.0146589	Co-expression	Stirewalt-Radich-2008
IL1A	IL6	0.0189743	Co-expression	Stirewalt-Radich-2008
IL1A	TNF	0.0195287	Co-expression	Stirewalt-Radich-2008
IL1A	CXCL3	0.0192622	Co-expression	Stirewalt-Radich-2008
IL1A	CCL4	0.0165445	Co-expression	Stirewalt-Radich-2008
IL1A	CXCL2	0.0151727	Co-expression	Stirewalt-Radich-2008
IL1A	CCL20	0.0201315	Co-expression	Stirewalt-Radich-2008
IL1A	PTGS2	0.014098	Co-expression	Stirewalt-Radich-2008
IL23A	IL1A	0.0283346	Co-expression	Stirewalt-Radich-2008
CSF3	IL10	0.0200285	Co-expression	Stirewalt-Radich-2008
CSF3	IL13	0.0225207	Co-expression	Stirewalt-Radich-2008
CSF3	IL1B	0.011948	Co-expression	Stirewalt-Radich-2008
CSF3	CXCL3	0.0137779	Co-expression	Stirewalt-Radich-2008
CSF3	CCL4	0.0106543	Co-expression	Stirewalt-Radich-2008
CSF3	CXCL1	0.0141226	Co-expression	Stirewalt-Radich-2008
CSF3	CXCL2	0.0137373	Co-expression	Stirewalt-Radich-2008
CSF3	PTGS2	0.0157059	Co-expression	Stirewalt-Radich-2008
OSM	IL10	0.0244489	Co-expression	Stirewalt-Radich-2008
OSM	PTGS2	0.00925194	Co-expression	Stirewalt-Radich-2008
OSM	CSF3	0.0177337	Co-expression	Stirewalt-Radich-2008
FPR1	CXCR2	0.00863305	Co-expression	Stirewalt-Radich-2008
FPR1	CXCL1	0.010367	Co-expression	Stirewalt-Radich-2008
TNFAIP3	IL8	0.00987367	Co-expression	Stirewalt-Radich-2008
TNFAIP3	IL1B	0.00956687	Co-expression	Stirewalt-Radich-2008
TNFAIP3	IL6	0.00990537	Co-expression	Stirewalt-Radich-2008
TNFAIP3	TNF	0.0125354	Co-expression	Stirewalt-Radich-2008
TNFAIP3	NFKB1	0.0107641	Co-expression	Stirewalt-Radich-2008
TNFAIP3	IL10RA	0.00400917	Co-expression	Stirewalt-Radich-2008
TNFAIP3	CXCL3	0.0109765	Co-expression	Stirewalt-Radich-2008
TNFAIP3	CCL4	0.0110172	Co-expression	Stirewalt-Radich-2008
TNFAIP3	CXCL1	0.00894511	Co-expression	Stirewalt-Radich-2008
TNFAIP3	CXCL2	0.0104021	Co-expression	Stirewalt-Radich-2008
TNFAIP3	CCL20	0.0104053	Co-expression	Stirewalt-Radich-2008
TNFAIP3	PTGS2	0.00904928	Co-expression	Stirewalt-Radich-2008
TNFAIP3	HCAR3	0.0111254	Co-expression	Stirewalt-Radich-2008
TNFAIP3	IL1A	0.0119363	Co-expression	Stirewalt-Radich-2008
TNFAIP3	CSF3	0.0103981	Co-expression	Stirewalt-Radich-2008
IL13	IL5	0.00902893	Co-expression	Tothill-Bowtell-2008 B
IL1B	IL10	0.0195206	Co-expression	Tothill-Bowtell-2008 B
IL1B	IL8	0.0209296	Co-expression	Tothill-Bowtell-2008 B
IL6	IL10	0.014718	Co-expression	Tothill-Bowtell-2008 B
IL6	IL8	0.0155789	Co-expression	Tothill-Bowtell-2008 B
IL6	IL1B	0.0156334	Co-expression	Tothill-Bowtell-2008 B
CXCR1	IL17	0.00277695	Co-expression	Tothill-Bowtell-2008 B
CXCR1	IL12B	0.00186526	Co-expression	Tothill-Bowtell-2008 B
TNF	IL8	0.0177728	Co-expression	Tothill-Bowtell-2008 B
TNF	IL1B	0.0203971	Co-expression	Tothill-Bowtell-2008 B
NFKB1	IL7	0.00774925	Co-expression	Tothill-Bowtell-2008 B
NFKB1	IL1B	0.0111643	Co-expression	Tothill-Bowtell-2008 B
NFKB1	TNF	0.00916425	Co-expression	Tothill-Bowtell-2008 B
IL12A	CXCR1	0.00135147	Co-expression	Tothill-Bowtell-2008 B
CXCL3	IL8	0.0366336	Co-expression	Tothill-Bowtell-2008 B
CXCL3	IL1B	0.0187968	Co-expression	Tothill-Bowtell-2008 B
CXCL3	IL6	0.0196035	Co-expression	Tothill-Bowtell-2008 B
CXCL3	TNF	0.0179692	Co-expression	Tothill-Bowtell-2008 B
CCL4	IFNG	0.00739112	Co-expression	Tothill-Bowtell-2008 B
CCL4	IL1B	0.011585	Co-expression	Tothill-Bowtell-2008 B
CCL4	TNF	0.0092158	Co-expression	Tothill-Bowtell-2008 B
CCL4	IL10RA	0.00312296	Co-expression	Tothill-Bowtell-2008 B
CXCL1	IL8	0.0283468	Co-expression	Tothill-Bowtell-2008 B
CXCL1	IL1B	0.013994	Co-expression	Tothill-Bowtell-2008 B
CXCL1	CXCL3	0.033554	Co-expression	Tothill-Bowtell-2008 B
CXCL2	IL8	0.0240597	Co-expression	Tothill-Bowtell-2008 B
CXCL2	IL6	0.0216437	Co-expression	Tothill-Bowtell-2008 B
CXCL2	CXCR1	0.00156862	Co-expression	Tothill-Bowtell-2008 B
CXCL2	CXCL3	0.0283216	Co-expression	Tothill-Bowtell-2008 B
CCL20	IL8	0.0269383	Co-expression	Tothill-Bowtell-2008 B
CCL20	IL1B	0.020522	Co-expression	Tothill-Bowtell-2008 B
CCL20	TNF	0.0250647	Co-expression	Tothill-Bowtell-2008 B
CCL20	NFKB1	0.00909787	Co-expression	Tothill-Bowtell-2008 B
CCL20	CXCL3	0.0218966	Co-expression	Tothill-Bowtell-2008 B
CCL20	CXCL1	0.0197424	Co-expression	Tothill-Bowtell-2008 B
PTGS2	IL10	0.0174683	Co-expression	Tothill-Bowtell-2008 B
PTGS2	IL6	0.0216729	Co-expression	Tothill-Bowtell-2008 B
PTGS2	CXCL3	0.0244703	Co-expression	Tothill-Bowtell-2008 B
PTGS2	CXCL2	0.0252179	Co-expression	Tothill-Bowtell-2008 B
HCAR3	IL8	0.0253873	Co-expression	Tothill-Bowtell-2008 B
HCAR3	IL1B	0.0181801	Co-expression	Tothill-Bowtell-2008 B
HCAR3	CXCR1	0.000994526	Co-expression	Tothill-Bowtell-2008 B
HCAR3	NFKB1	0.00959893	Co-expression	Tothill-Bowtell-2008 B
HCAR3	CXCL3	0.0221313	Co-expression	Tothill-Bowtell-2008 B
HCAR3	CXCL1	0.0198195	Co-expression	Tothill-Bowtell-2008 B
IL23A	CXCR1	0.00292914	Co-expression	Tothill-Bowtell-2008 B
CSF3	IL5	0.00860596	Co-expression	Tothill-Bowtell-2008 B
CSF3	IL13	0.0025205	Co-expression	Tothill-Bowtell-2008 B
OSM	IL1B	0.0221456	Co-expression	Tothill-Bowtell-2008 B
OSM	CCL4	0.0117032	Co-expression	Tothill-Bowtell-2008 B
FPR1	IL10	0.0170074	Co-expression	Tothill-Bowtell-2008 B
FPR1	CXCR2	0.0136471	Co-expression	Tothill-Bowtell-2008 B
FPR1	IL1B	0.013852	Co-expression	Tothill-Bowtell-2008 B
FPR1	IL6	0.0103942	Co-expression	Tothill-Bowtell-2008 B
FPR1	CXCR1	0.000919224	Co-expression	Tothill-Bowtell-2008 B
IL17RA	IL10RA	0.00584301	Co-expression	Tothill-Bowtell-2008 B
TNFAIP3	IL8	0.0119353	Co-expression	Tothill-Bowtell-2008 B
TNFAIP3	IL1B	0.0158924	Co-expression	Tothill-Bowtell-2008 B
TNFAIP3	IL6	0.0115943	Co-expression	Tothill-Bowtell-2008 B
TNFAIP3	TNF	0.0164075	Co-expression	Tothill-Bowtell-2008 B
TNFAIP3	NFKB1	0.00823123	Co-expression	Tothill-Bowtell-2008 B
TNFAIP3	IL10RA	0.0035932	Co-expression	Tothill-Bowtell-2008 B
TNFAIP3	CXCL3	0.0122568	Co-expression	Tothill-Bowtell-2008 B
TNFAIP3	CCL4	0.00964541	Co-expression	Tothill-Bowtell-2008 B
TNFAIP3	CCL20	0.0142796	Co-expression	Tothill-Bowtell-2008 B
TNFAIP3	OSM	0.0149379	Co-expression	Tothill-Bowtell-2008 B
IL13	IL5	0.0370494	Co-expression	Brunner-Guttman-Yassky-2019
IL1B	IFNG	0.00658042	Co-expression	Brunner-Guttman-Yassky-2019
IL1B	IL8	0.0172232	Co-expression	Brunner-Guttman-Yassky-2019
IL6	IL8	0.010982	Co-expression	Brunner-Guttman-Yassky-2019
IL6	IL1B	0.0124581	Co-expression	Brunner-Guttman-Yassky-2019
CXCR1	IL8	0.0119364	Co-expression	Brunner-Guttman-Yassky-2019
CXCR1	IL1B	0.0127071	Co-expression	Brunner-Guttman-Yassky-2019
CXCR1	IL6	0.0102703	Co-expression	Brunner-Guttman-Yassky-2019
TNF	IL12B	0.00935133	Co-expression	Brunner-Guttman-Yassky-2019
IL10RA	TNF	0.00349606	Co-expression	Brunner-Guttman-Yassky-2019
CXCL3	IL8	0.0138601	Co-expression	Brunner-Guttman-Yassky-2019
CXCL3	IL1B	0.013084	Co-expression	Brunner-Guttman-Yassky-2019
CXCL3	IL6	0.0123396	Co-expression	Brunner-Guttman-Yassky-2019
CXCL3	CXCR1	0.0104459	Co-expression	Brunner-Guttman-Yassky-2019
CCL4	IFNG	0.00721731	Co-expression	Brunner-Guttman-Yassky-2019
CCL4	IL8	0.00765683	Co-expression	Brunner-Guttman-Yassky-2019
CCL4	IL1B	0.00819808	Co-expression	Brunner-Guttman-Yassky-2019
CCL4	CXCR1	0.00674934	Co-expression	Brunner-Guttman-Yassky-2019
CCL4	CXCL3	0.00648889	Co-expression	Brunner-Guttman-Yassky-2019
CXCL1	IL12B	0.00890057	Co-expression	Brunner-Guttman-Yassky-2019
CXCL1	IL8	0.0114391	Co-expression	Brunner-Guttman-Yassky-2019
CXCL1	IL1B	0.00904094	Co-expression	Brunner-Guttman-Yassky-2019
CXCL1	IL6	0.00758287	Co-expression	Brunner-Guttman-Yassky-2019
CXCL1	TNF	0.00614496	Co-expression	Brunner-Guttman-Yassky-2019
CXCL1	CXCL3	0.0094063	Co-expression	Brunner-Guttman-Yassky-2019
CCL20	TNF	0.0127118	Co-expression	Brunner-Guttman-Yassky-2019
CCL20	IL9	0.0138373	Co-expression	Brunner-Guttman-Yassky-2019
CCL20	CXCL1	0.0139328	Co-expression	Brunner-Guttman-Yassky-2019
PTGS2	IL8	0.0180537	Co-expression	Brunner-Guttman-Yassky-2019
PTGS2	IL1B	0.0159776	Co-expression	Brunner-Guttman-Yassky-2019
PTGS2	IL6	0.013962	Co-expression	Brunner-Guttman-Yassky-2019
PTGS2	CXCR1	0.0158633	Co-expression	Brunner-Guttman-Yassky-2019
PTGS2	CXCL3	0.0171756	Co-expression	Brunner-Guttman-Yassky-2019
PTGS2	CXCL1	0.0101566	Co-expression	Brunner-Guttman-Yassky-2019
NLRP7	IL10	0.0238916	Co-expression	Brunner-Guttman-Yassky-2019
IL1A	IL1B	0.020069	Co-expression	Brunner-Guttman-Yassky-2019
IL1A	CXCR1	0.0128122	Co-expression	Brunner-Guttman-Yassky-2019
IL23A	CXCL1	0.00821111	Co-expression	Brunner-Guttman-Yassky-2019
PROK2	IFNG	0.00635538	Co-expression	Brunner-Guttman-Yassky-2019
PROK2	IL8	0.0172399	Co-expression	Brunner-Guttman-Yassky-2019
PROK2	IL1B	0.0203799	Co-expression	Brunner-Guttman-Yassky-2019
PROK2	IL6	0.0117979	Co-expression	Brunner-Guttman-Yassky-2019
PROK2	CXCR1	0.0130873	Co-expression	Brunner-Guttman-Yassky-2019
PROK2	CXCL3	0.0119957	Co-expression	Brunner-Guttman-Yassky-2019
PROK2	CCL4	0.00961115	Co-expression	Brunner-Guttman-Yassky-2019
PROK2	PTGS2	0.0169322	Co-expression	Brunner-Guttman-Yassky-2019
PROK2	IL1A	0.0153606	Co-expression	Brunner-Guttman-Yassky-2019
CSF3	IFNG	0.00636329	Co-expression	Brunner-Guttman-Yassky-2019
CSF3	IL1B	0.008111	Co-expression	Brunner-Guttman-Yassky-2019
CSF3	IL6	0.0098301	Co-expression	Brunner-Guttman-Yassky-2019
CSF3	CXCL3	0.00890998	Co-expression	Brunner-Guttman-Yassky-2019
OSM	IL8	0.0152901	Co-expression	Brunner-Guttman-Yassky-2019
OSM	PROK2	0.014829	Co-expression	Brunner-Guttman-Yassky-2019
IL17RA	IL10RA	0.00644928	Co-expression	Brunner-Guttman-Yassky-2019
TNFAIP3	TNF	0.0135813	Co-expression	Brunner-Guttman-Yassky-2019
TNFAIP3	IL10RA	0.00591603	Co-expression	Brunner-Guttman-Yassky-2019
TNFAIP3	CCL20	0.0229245	Co-expression	Brunner-Guttman-Yassky-2019
BRCA2	IL2	0.0278994	Co-expression	Tasaki-Takeuchi-2018 B
IL7	BRCA2	0.0182058	Co-expression	Tasaki-Takeuchi-2018 B
IL1B	IL8	0.0122376	Co-expression	Tasaki-Takeuchi-2018 B
IL6	IL12B	0.0189316	Co-expression	Tasaki-Takeuchi-2018 B
CXCR1	CXCR2	0.00184027	Co-expression	Tasaki-Takeuchi-2018 B
CXCR1	BRCA1	0.00626545	Co-expression	Tasaki-Takeuchi-2018 B
TNF	IL12B	0.0128245	Co-expression	Tasaki-Takeuchi-2018 B
TNF	IL1B	0.012937	Co-expression	Tasaki-Takeuchi-2018 B
IL12A	IFNG	0.0104084	Co-expression	Tasaki-Takeuchi-2018 B
CXCL3	IL12B	0.00834078	Co-expression	Tasaki-Takeuchi-2018 B
CXCL3	IL1B	0.00757956	Co-expression	Tasaki-Takeuchi-2018 B
CXCL3	IL6	0.00934309	Co-expression	Tasaki-Takeuchi-2018 B
CXCL3	TNF	0.00830838	Co-expression	Tasaki-Takeuchi-2018 B
CCL4	TNF	0.0101123	Co-expression	Tasaki-Takeuchi-2018 B
CXCL2	IL1B	0.00612959	Co-expression	Tasaki-Takeuchi-2018 B
CXCL2	IL6	0.006318	Co-expression	Tasaki-Takeuchi-2018 B
CXCL2	TNF	0.00630293	Co-expression	Tasaki-Takeuchi-2018 B
CXCL2	CXCL3	0.00408137	Co-expression	Tasaki-Takeuchi-2018 B
CCL20	IL12B	0.014415	Co-expression	Tasaki-Takeuchi-2018 B
CCL20	IL1B	0.0110476	Co-expression	Tasaki-Takeuchi-2018 B
CCL20	TNF	0.0130745	Co-expression	Tasaki-Takeuchi-2018 B
CCL20	CXCL3	0.00882665	Co-expression	Tasaki-Takeuchi-2018 B
CCL20	CXCL2	0.00579296	Co-expression	Tasaki-Takeuchi-2018 B
PTGS2	IL8	0.00677278	Co-expression	Tasaki-Takeuchi-2018 B
PTGS2	IL1B	0.00718664	Co-expression	Tasaki-Takeuchi-2018 B
HCAR3	IL8	0.00478761	Co-expression	Tasaki-Takeuchi-2018 B
HCAR3	CXCL1	0.0024081	Co-expression	Tasaki-Takeuchi-2018 B
HCAR3	PTGS2	0.00284812	Co-expression	Tasaki-Takeuchi-2018 B
IL1A	IL12B	0.0258676	Co-expression	Tasaki-Takeuchi-2018 B
IL1A	IL1B	0.0174562	Co-expression	Tasaki-Takeuchi-2018 B
IL1A	TNF	0.0205005	Co-expression	Tasaki-Takeuchi-2018 B
IL1A	CXCL3	0.0126274	Co-expression	Tasaki-Takeuchi-2018 B
IL1A	CXCL2	0.0086458	Co-expression	Tasaki-Takeuchi-2018 B
IL1A	CCL20	0.0213998	Co-expression	Tasaki-Takeuchi-2018 B
IL1A	PTGS2	0.00908093	Co-expression	Tasaki-Takeuchi-2018 B
CSF3	IL10	0.00524491	Co-expression	Tasaki-Takeuchi-2018 B
OSM	CXCL1	0.00697263	Co-expression	Tasaki-Takeuchi-2018 B
FPR1	IL8	0.00350684	Co-expression	Tasaki-Takeuchi-2018 B
FPR1	IL1B	0.00362222	Co-expression	Tasaki-Takeuchi-2018 B
FPR1	PTGS2	0.00212452	Co-expression	Tasaki-Takeuchi-2018 B
FPR1	HCAR3	0.00151345	Co-expression	Tasaki-Takeuchi-2018 B
IL17RA	HCAR3	0.00451066	Co-expression	Tasaki-Takeuchi-2018 B
IL17RA	FPR1	0.00324436	Co-expression	Tasaki-Takeuchi-2018 B
BRCA2	BRCA1	0.0152484	Co-expression	Pellagatti-Boultwood-2010
IL1B	IL12B	0.0239259	Co-expression	Pellagatti-Boultwood-2010
IL1B	IL8	0.00914535	Co-expression	Pellagatti-Boultwood-2010
IL6	IL12B	0.0185532	Co-expression	Pellagatti-Boultwood-2010
IL6	IL8	0.00747049	Co-expression	Pellagatti-Boultwood-2010
IL6	IL1B	0.0176286	Co-expression	Pellagatti-Boultwood-2010
TNF	IL8	0.00929625	Co-expression	Pellagatti-Boultwood-2010
TNF	IL1B	0.019125	Co-expression	Pellagatti-Boultwood-2010
TNF	IL6	0.0194004	Co-expression	Pellagatti-Boultwood-2010
NFKB1	IL8	0.00572402	Co-expression	Pellagatti-Boultwood-2010
NFKB1	IL6	0.00676407	Co-expression	Pellagatti-Boultwood-2010
CXCL3	IL8	0.00799694	Co-expression	Pellagatti-Boultwood-2010
CXCL3	IL1B	0.00992315	Co-expression	Pellagatti-Boultwood-2010
CXCL3	IL6	0.00943044	Co-expression	Pellagatti-Boultwood-2010
CXCL3	TNF	0.012317	Co-expression	Pellagatti-Boultwood-2010
CXCL3	NFKB1	0.00595023	Co-expression	Pellagatti-Boultwood-2010
CCL4	IL12B	0.0241902	Co-expression	Pellagatti-Boultwood-2010
CCL4	IL8	0.00907168	Co-expression	Pellagatti-Boultwood-2010
CCL4	IL1B	0.0211098	Co-expression	Pellagatti-Boultwood-2010
CCL4	IL6	0.0186266	Co-expression	Pellagatti-Boultwood-2010
CCL4	TNF	0.0203424	Co-expression	Pellagatti-Boultwood-2010
CCL4	IL10RA	0.00792621	Co-expression	Pellagatti-Boultwood-2010
CCL4	CXCL3	0.0111789	Co-expression	Pellagatti-Boultwood-2010
CXCL1	IL8	0.0101642	Co-expression	Pellagatti-Boultwood-2010
CXCL1	IL1B	0.0146156	Co-expression	Pellagatti-Boultwood-2010
CXCL1	IL6	0.014691	Co-expression	Pellagatti-Boultwood-2010
CXCL1	TNF	0.0203336	Co-expression	Pellagatti-Boultwood-2010
CXCL1	NFKB1	0.00968635	Co-expression	Pellagatti-Boultwood-2010
CXCL1	CXCL3	0.0129839	Co-expression	Pellagatti-Boultwood-2010
CXCL1	CCL4	0.0178633	Co-expression	Pellagatti-Boultwood-2010
CXCL2	IL8	0.016089	Co-expression	Pellagatti-Boultwood-2010
CXCL2	NFKB1	0.0105729	Co-expression	Pellagatti-Boultwood-2010
CXCL2	CXCL3	0.0170697	Co-expression	Pellagatti-Boultwood-2010
CXCL2	CCL4	0.0161585	Co-expression	Pellagatti-Boultwood-2010
CXCL2	CXCL1	0.0220858	Co-expression	Pellagatti-Boultwood-2010
CCL20	IL12B	0.0325841	Co-expression	Pellagatti-Boultwood-2010
CCL20	IL8	0.00878355	Co-expression	Pellagatti-Boultwood-2010
CCL20	IL1B	0.0295667	Co-expression	Pellagatti-Boultwood-2010
[truncated: 5,311 more rows]
