# Supplementary material for: Aspirin and Cancer Survival: An Analysis of Molecular Mechanisms
Source: MDPI journal article supplement (doi:10.3390/cancers16010223), 2024-01-03
Supplement: s1 [file s1]

Additional file S1: Showing type of gene-gene interaction and weight between 11 main and their interacting genes

| Gene 1 | Gene 2 | Weight   | Network group         |
|--------|--------|----------|-----------------------|
| VEGFA  | FLT1   | 0.020744 | Co-expression         |
| VEGFR  | FLT1   | 0.016419 | Co-expression         |
| p53    | NFKB1  | 0.010398 | Co-expression         |
| GREM1  | NFKB1  | 0.012934 | Co-expression         |
| VEGFC  | FLT1   | 0.015285 | Co-expression         |
| VEGFC  | VEGFR  | 0.013902 | Co-expression         |
| SHISA2 | VEGFC  | 0.013704 | Co-expression         |
| NFKB1  | PTGS2  | 0.025296 | Co-expression         |
| NFKB1  | PARP1  | 0.02428  | Co-expression         |
| HIF1A  | VEGFA  | 0.013041 | Co-expression         |
| HRAS   | CENPB  | 0.010719 | Co-expression         |
| VEGFR  | FLT1   | 0.01931  | Co-expression         |
| VEGFB  | PTGS2  | 0.009474 | Co-expression         |
| VEGFR  | FLT1   | 0.014055 | Co-expression         |
| VEGFC  | VEGFR  | 0.005695 | Co-expression         |
| NRP2   | VEGFC  | 0.010776 | Co-expression         |
| HIF1A  | REL    | 0.010267 | Co-expression         |
| NRP1   | VEGFR  | 0.013921 | Co-expression         |
| CENPB  | VEGFB  | 0.005867 | Co-expression         |
| p53    | PTGS2  | 0.009865 | Co-expression         |
| VEGFC  | VEGFR  | 0.011381 | Co-expression         |
| VEGFC  | PGF    | 0.010706 | Co-expression         |
| REL    | VEGFA  | 0.020182 | Co-expression         |
| HIF1A  | VEGFR  | 0.009953 | Co-expression         |
| HRAS   | VEGFB  | 0.012284 | Co-expression         |
| VEGFA  | PTGS2  | 0.010792 | Co-expression         |
| VEGFC  | NFKB1  | 0.015597 | Co-expression         |
| FLT4   | VEGFR  | 0.015038 | Co-expression         |
| HIF1A  | PTGS2  | 0.011642 | Co-expression         |
| NRP1   | PTK2   | 0.012855 | Co-expression         |
| HRAS   | VEGFB  | 0.022873 | Co-expression         |
| NFKB1  | PTGS2  | 0.008028 | Co-expression         |
| VEGFC  | VEGFR  | 0.002712 | Co-expression         |
| REL    | NFKB1  | 0.008002 | Co-expression         |
| ARNT   | PARP1  | 0.011595 | Co-expression         |
| CENPB  | VEGFR  | 0.002159 | Co-expression         |
| p53    | VEGFR  | 0.251096 | Genetic Interactions  |
| REL    | NFKB1  | 1        | Genetic Interactions  |
| VEGFA  | FLT1   | 0.765367 | Physical Interactions |
| VEGFR  | VEGFA  | 0.414214 | Physical Interactions |
| GREM1  | VEGFR  | 0.765367 | Physical Interactions |

|        |        |          |                       |
|--------|--------|----------|-----------------------|
| VEGFA  | FLT1   | 0.259808 | Physical Interactions |
| VEGFR  | VEGFA  | 0.294428 | Physical Interactions |
| p53    | PTGS2  | 0.174421 | Physical Interactions |
| PGF    | FLT1   | 0.353001 | Physical Interactions |
| VEGFC  | VEGFR  | 0.361476 | Physical Interactions |
| FLT4   | VEGFC  | 0.696859 | Physical Interactions |
| NRP2   | VEGFA  | 0.335654 | Physical Interactions |
| NRP2   | PGF    | 0.456053 | Physical Interactions |
| PLCG1  | FLT1   | 0.080979 | Physical Interactions |
| PLCG1  | VEGFR  | 0.09177  | Physical Interactions |
| HIF1A  | p53    | 0.015081 | Physical Interactions |
| ARNT   | HIF1A  | 0.068108 | Physical Interactions |
| SPAG9  | NFKB1  | 0.58416  | Physical Interactions |
| APPL1  | PIK3CA | 0.554    | Physical Interactions |
| HRAS   | PIK3CA | 0.222599 | Physical Interactions |
| VEGFA  | FLT1   | 0.6867   | Physical Interactions |
| VEGFB  | VEGFA  | 0.352144 | Physical Interactions |
| REL    | NFKB1  | 0.086294 | Physical Interactions |
| ARNT   | HIF1A  | 0.077247 | Physical Interactions |
| SHISA2 | PTGES2 | 0.527581 | Physical Interactions |
| VEGFR  | VEGFA  | 0.344082 | Physical Interactions |
| p53    | PTGS2  | 0.008964 | Physical Interactions |
| p53    | PARP1  | 0.004882 | Physical Interactions |
| NOS3   | p53    | 0.023252 | Physical Interactions |
| HIF1A  | p53    | 0.003357 | Physical Interactions |
| PTK2   | p53    | 0.003493 | Physical Interactions |
| NRP1   | PGF    | 0.870522 | Physical Interactions |
| CENPB  | PARP2  | 0.539726 | Physical Interactions |
| CENPB  | PARP1  | 0.068953 | Physical Interactions |
| SPAG9  | NFKB1  | 0.098695 | Physical Interactions |
| p53    | PTGS2  | 0.098602 | Physical Interactions |
| p53    | PARP1  | 0.012737 | Physical Interactions |
| CENPB  | PARP2  | 0.556068 | Physical Interactions |
| CENPB  | PARP1  | 0.170838 | Physical Interactions |
| VEGFR  | VEGFA  | 0.164772 | Physical Interactions |
| p53    | PARP1  | 0.006442 | Physical Interactions |
| FLT4   | VEGFR  | 0.169992 | Physical Interactions |
| PLCG1  | VEGFR  | 0.024351 | Physical Interactions |
| PTK2   | p53    | 0.008655 | Physical Interactions |
| NRP1   | VEGFA  | 0.656783 | Physical Interactions |
| NRP1   | VEGFR  | 0.120273 | Physical Interactions |
| HRAS   | PIK3CA | 0.032061 | Physical Interactions |
| VEGFA  | FLT1   | 0.247389 | Physical Interactions |
| VEGFR  | VEGFA  | 0.093198 | Physical Interactions |
| VEGFB  | FLT1   | 0.842676 | Physical Interactions |
| FLT4   | VEGFC  | 0.519377 | Physical Interactions |

|       |        |          |                        |
|-------|--------|----------|------------------------|
| VEGFD | FLT4   | 0.519377 | Physical Interactions  |
| PARP3 | PARP1  | 0.290457 | Physical Interactions  |
| NRP1  | VEGFA  | 0.259738 | Physical Interactions  |
| ARNT  | HIF1A  | 0.069681 | Physical Interactions  |
| APPL1 | PIK3CA | 0.135466 | Physical Interactions  |
| VEGFR | VEGFA  | 0.360202 | Predicted              |
| FLT4  | VEGFC  | 0.578164 | Predicted              |
| VEGFD | VEGFR  | 0.63931  | Predicted              |
| PLCG1 | FLT1   | 0.157518 | Predicted              |
| CENPB | PARP1  | 0.52775  | Predicted              |
| PARP1 | PARP2  | 0.121717 | Predicted              |
| NFKB1 | PARP1  | 0.017072 | Predicted              |
| p53   | PARP1  | 0.006247 | Predicted              |
| PGF   | VEGFA  | 0.153457 | Predicted              |
| VEGFB | VEGFA  | 0.21321  | Predicted              |
| FLT4  | FLT1   | 0.211842 | Predicted              |
| VEGFD | VEGFC  | 0.796225 | Predicted              |
| VEGFD | VEGFB  | 0.380021 | Predicted              |
| NRP2  | PGF    | 0.140402 | Predicted              |
| PARP3 | PARP1  | 0.335989 | Predicted              |
| PTK2  | FLT1   | 0.03153  | Predicted              |
| PTK2  | p53    | 0.004455 | Predicted              |
| PTK2  | FLT4   | 0.075653 | Predicted              |
| PTK2  | PLCG1  | 0.011178 | Predicted              |
| NRP1  | PGF    | 0.103095 | Predicted              |
| NRP1  | NRP2   | 0.086735 | Predicted              |
| CENPB | PARP1  | 0.335989 | Predicted              |
| APPL1 | PIK3CA | 0.127628 | Predicted              |
| PARP1 | PARP2  | 0.152838 | Shared protein domains |
| VEGFR | FLT1   | 0.027243 | Shared protein domains |
| p53   | NFKB1  | 0.009621 | Shared protein domains |
| PGF   | VEGFA  | 0.052649 | Shared protein domains |
| VEGFC | VEGFA  | 0.055282 | Shared protein domains |
| VEGFC | PGF    | 0.053835 | Shared protein domains |
| VEGFB | VEGFA  | 0.083625 | Shared protein domains |
| VEGFB | PGF    | 0.052649 | Shared protein domains |
| VEGFB | VEGFC  | 0.055282 | Shared protein domains |
| FLT4  | FLT1   | 0.031181 | Shared protein domains |
| FLT4  | VEGFR  | 0.03434  | Shared protein domains |
| VEGFD | VEGFA  | 0.054009 | Shared protein domains |
| VEGFD | PGF    | 0.052595 | Shared protein domains |
| VEGFD | VEGFC  | 0.055226 | Shared protein domains |
| VEGFD | VEGFB  | 0.054009 | Shared protein domains |
| REL   | NFKB1  | 0.054156 | Shared protein domains |
| REL   | p53    | 0.013134 | Shared protein domains |
| PARP3 | PARP2  | 0.277026 | Shared protein domains |

|       |        |          |                        |
|-------|--------|----------|------------------------|
| PARP3 | PARP1  | 0.152838 | Shared protein domains |
| PTK2  | PIK3CA | 0.002971 | Shared protein domains |
| PTK2  | FLT1   | 0.006622 | Shared protein domains |
| PTK2  | VEGFR  | 0.007295 | Shared protein domains |
| PTK2  | FLT4   | 0.008728 | Shared protein domains |
| NRP1  | NRP2   | 0.075612 | Shared protein domains |
| ARNT  | HIF1A  | 0.015578 | Shared protein domains |
| PARP1 | PARP2  | 0.13543  | Shared protein domains |
| VEGFR | FLT1   | 0.072263 | Shared protein domains |
| PGF   | VEGFA  | 0.14711  | Shared protein domains |
| VEGFC | VEGFA  | 0.14711  | Shared protein domains |
| VEGFC | PGF    | 0.14711  | Shared protein domains |
| VEGFB | VEGFA  | 0.14711  | Shared protein domains |
| VEGFB | PGF    | 0.14711  | Shared protein domains |
| VEGFB | VEGFC  | 0.14711  | Shared protein domains |
| FLT4  | FLT1   | 0.070847 | Shared protein domains |
| FLT4  | VEGFR  | 0.070847 | Shared protein domains |
| VEGFD | VEGFA  | 0.14711  | Shared protein domains |
| VEGFD | PGF    | 0.14711  | Shared protein domains |
| VEGFD | VEGFC  | 0.14711  | Shared protein domains |
| VEGFD | VEGFB  | 0.14711  | Shared protein domains |
| REL   | NFKB1  | 0.046424 | Shared protein domains |
| PARP3 | PARP2  | 0.215495 | Shared protein domains |
| PARP3 | PARP1  | 0.13543  | Shared protein domains |
| NRP1  | NRP2   | 0.059382 | Shared protein domains |
| ARNT  | HIF1A  | 0.019222 | Shared protein domains |
