# Supplementary material for: Aspirin and Cancer Survival: An Analysis of Molecular Mechanisms
Source: MDPI journal article supplement (doi:10.3390/cancers16010223), 2024-01-03
Supplement: s1 [file s1]

## Interactions with apoptotic pathway

| <b>Interactors found in the analysis (9)</b> |                  |                                                |       |                  |                                                                        |
|----------------------------------------------|------------------|------------------------------------------------|-------|------------------|------------------------------------------------------------------------|
| BAX                                          | Q07812, Q07813-1 | Q07817, Q16611, O43521, P10415, Q07812, P55957 | BCL2  | P10415, P10415-1 | P51572, Q92934, Q16611, O43521, P10415, Q07812, P55957, Q13794, Q9BXH1 |
| EGFR                                         | P00533           | P10636, P12830, Q8WUM4, P45983, P06396, Q05397 | Myc   | P01106           | O60313, P06396                                                         |
| NFKB1                                        | P19838           | P35222                                         | PARP1 | P09874           | P09429                                                                 |
| STAT3                                        | P40763           | P51813                                         | TNF   | P01375           | Q13546, Q13490                                                         |
| p53                                          | P04637           | P09429, Q05655, P10415, Q8N726, Q05397         |       |                  |                                                                        |
