# Supplementary material for: Aspirin and Cancer Survival: An Analysis of Molecular Mechanisms
Source: MDPI journal article supplement (doi:10.3390/cancers16010223), 2024-01-03
Supplement: s1 [file s1]

### Supplementary table S6

Interactions with extracellular matrix pathway

| Input | UniProt Id | Interacts with |
|-------|------------|----------------|
| EGFR  | P00533     | P12830         |

### Supplementary table S7

Interactions with DNA repair pathway

| Interactors found in the analysis (7) |                  |                                                                                                                                |       |        |                                                                        |
|---------------------------------------|------------------|--------------------------------------------------------------------------------------------------------------------------------|-------|--------|------------------------------------------------------------------------|
| BRCA1                                 | P38398, P38398-1 | Q9BX63, O15360, Q12888, P51587, P38398, P46736, P40692, Q92560, P52292, Q99728, Q9BXW9, Q96RL1, Q6UWZ7, Q06609, Q86YC2, O14757 | BRCA2 | P51587 | P38398, O43542, P60896, O43502, Q9Y253, Q9BXW9, P51587, Q06609, Q86YC2 |
| EGFR                                  | P00533           | P00519, P53041, P07992, P45983                                                                                                 | MUC1  | P15941 | P00519                                                                 |
| Myc                                   | P01106           | Q8N6T7, Q12888, P52292, P52701                                                                                                 | PARP1 | P09874 | Q8N2W9, P78527                                                         |
| p53                                   | P04637           | O96017, P38398, Q09472, P63279, Q12888, Q92993, Q8N2W9, P51587, Q96PM5                                                         |       |        |                                                                        |

### Supplementary table S8

Autophagy pathway

Interactors found in the analysis (4)

| Input | UniProtId | Interacts with | Input | UniProtId | Interacts with |
|-------|-----------|----------------|-------|-----------|----------------|
| BAX   | Q07813    | P21796         | BCL2  | P10415    | Q9C0C7         |
| BRAF  | P15056    | P11142         | EGFR  | P00533    | P11142         |
