# Supplementary material for: Aspirin and Cancer Survival: An Analysis of Molecular Mechanisms
Source: MDPI journal article supplement (doi:10.3390/cancers16010223), 2024-01-03
Supplement: s1 [file s1]

Additional file S3: Interaction of interleukin pathway with 37 identified genes produced by Reactome database

| Input | UniProt Id             | Input | UniProt Id      | Input  | UniProt Id      |
|-------|------------------------|-------|-----------------|--------|-----------------|
| BCL2  | P10415                 | IFNG  | P01579          | IL10   | P22301          |
| IL12B | P29460                 | IL13  | P35225          | IL17   | Q16552          |
| IL1B  | P01583, P01584, Q8WWZ1 | IL2   | P60568          | IL4    | P05112          |
| IL5   | P05113                 | IL6   | P05231          | IL7    | P13232          |
| IL8   | P10145                 | JAK1  | P23458          | JAK2   | O60674          |
| JAK3  | P52333                 | MAPK  | P28482          | MUC1   | P15941          |
| Myc   | P01106                 | NFKB1 | P19838          | PIK3CA | P42336          |
| PTGS2 | P35354                 | STAT  | P40763          | STAT3  | P40763          |
| TNF   | P01375                 | p53   | P04637          |        |                 |
| Input | Ensembl Id             | Input | Ensembl id      | Input  | Ensembl id      |
| BCL2  | ENSG00000171791        | IFNG  | ENSG00000111537 | IL10   | ENSG00000136634 |
| IL12B | ENSG00000113302        | IL17  | ENSG00000112115 | IL1B   | ENSG00000125538 |
| IL6   | ENSG00000136244        | IL8   | ENSG00000169429 | MUC1   | ENSG00000185499 |
| Myc   | ENSG00000136997        | PTGS2 | ENSG00000073756 | TNF    | ENSG00000232810 |
| p53   | ENSG00000141510        |       |                 |        |                 |

## Interactors found in the analysis (22)

| Input | UniProt Id                         | Interacts with                                                                                                                                         | Input  | UniProt Id                  | Interacts with                                                         |
|-------|------------------------------------|--------------------------------------------------------------------------------------------------------------------------------------------------------|--------|-----------------------------|------------------------------------------------------------------------|
| BCL2  | P10415                             | P00441                                                                                                                                                 | BRAF   | P15056                      | P63104, P38646                                                         |
| EGFR  | P00533                             | P29353, P22681, P14625, Q13905, Q06124, P38646, Q9UQC2, P15498, P42224, O00170, P62993, P14174, Q9Y6K9, P23528, P45983, O14543, P63104, P07355, P40763 | IL10   | P22301                      | Q08334                                                                 |
| IL12B | P29460                             | P29460, Q9NPF7, P29459                                                                                                                                 | IL13   | P35225                      | P78552, Q14627                                                         |
| IL2   | P60568                             | P01589, P14784                                                                                                                                         | IL4    | P05112                      | P24394, P78552, P31785                                                 |
| IL5   | P05113                             | Q01344, P32927                                                                                                                                         | IL6    | P05231                      | P40189, P08887                                                         |
| IL7   | P13232                             | P16871                                                                                                                                                 | JAK1   | P23458                      | P42224, O60674, P40763                                                 |
| JAK2  | O60674, Q62120                     | Q01344, Q5VWK5, O60674, P32927, P23458                                                                                                                 | JAK3   | P52333                      | P17987                                                                 |
| Myc   | P01106, EBI-1265559                | O15111, Q9Y6K9, P23771, P40763                                                                                                                         | NFKB1  | P25799-1, P19838, P19838-1  | P41279, O15111, P19838, Q9Y6K9, Q8NFZ5, O14920, P25963                 |
| PARP1 | P09874                             | Q13007                                                                                                                                                 | PIK3CA | P42336                      | P62993, P01100                                                         |
| STAT  | P35610, EBI-10097350, EBI-10952519 | P42224, Q14765, P27824, P40763                                                                                                                         | STAT3  | EBI-9914958, P42227, P40763 | P42224, P40189, P43405, P62993, P22681, P23458, P49137, Q99062, P40763 |
| TNF   | P01375                             | Q16623, Q9Y6K9                                                                                                                                         | p53    | P04637                      | P17987, O14920, P63104, P38646                                         |
