# Supplementary material for: Aspirin and Cancer Survival: An Analysis of Molecular Mechanisms
Source: MDPI journal article supplement (doi:10.3390/cancers16010223), 2024-01-03

Additional Figure S2: A). The gene-gene interaction of PTGS2 and PTGES2 with tumor suppressor genes (purple – co-expression, pink -physical interaction, green-genetic interaction, orange-predicted interactions). B). protein-protein interaction of PTGS2/PTGES2 with tumor suppressor proteins having 5 nodes and 5 edges, the interaction was statistically not significant ( $p=0.07$ ). (light blue- curated databases, pink-experimentally determined; green- predicted gene neighborhood; red-predicted gene fusion; blue-predicted gene co-occurrence). C) Protein-protein interaction of Cellular proliferation and tumor oncogenes with tumor suppressor genes showing statistically significant interactions ( $p<1.0e^{-16}$ )

(light blue- curated databases, pink-experimentally determined; green- predicted gene neighborhood; red-predicted gene fusion; blue-predicted gene co-occurrence)

. D) Protein-protein interaction of interleukin and cytokine genes with tumor suppressor genes showing statistically significant interactions ( $p<1.0e^{-16}$ )

(light blue- curated databases, pink-experimentally determined; green- predicted gene neighborhood; red-predicted gene fusion; blue-predicted gene co-occurrence)

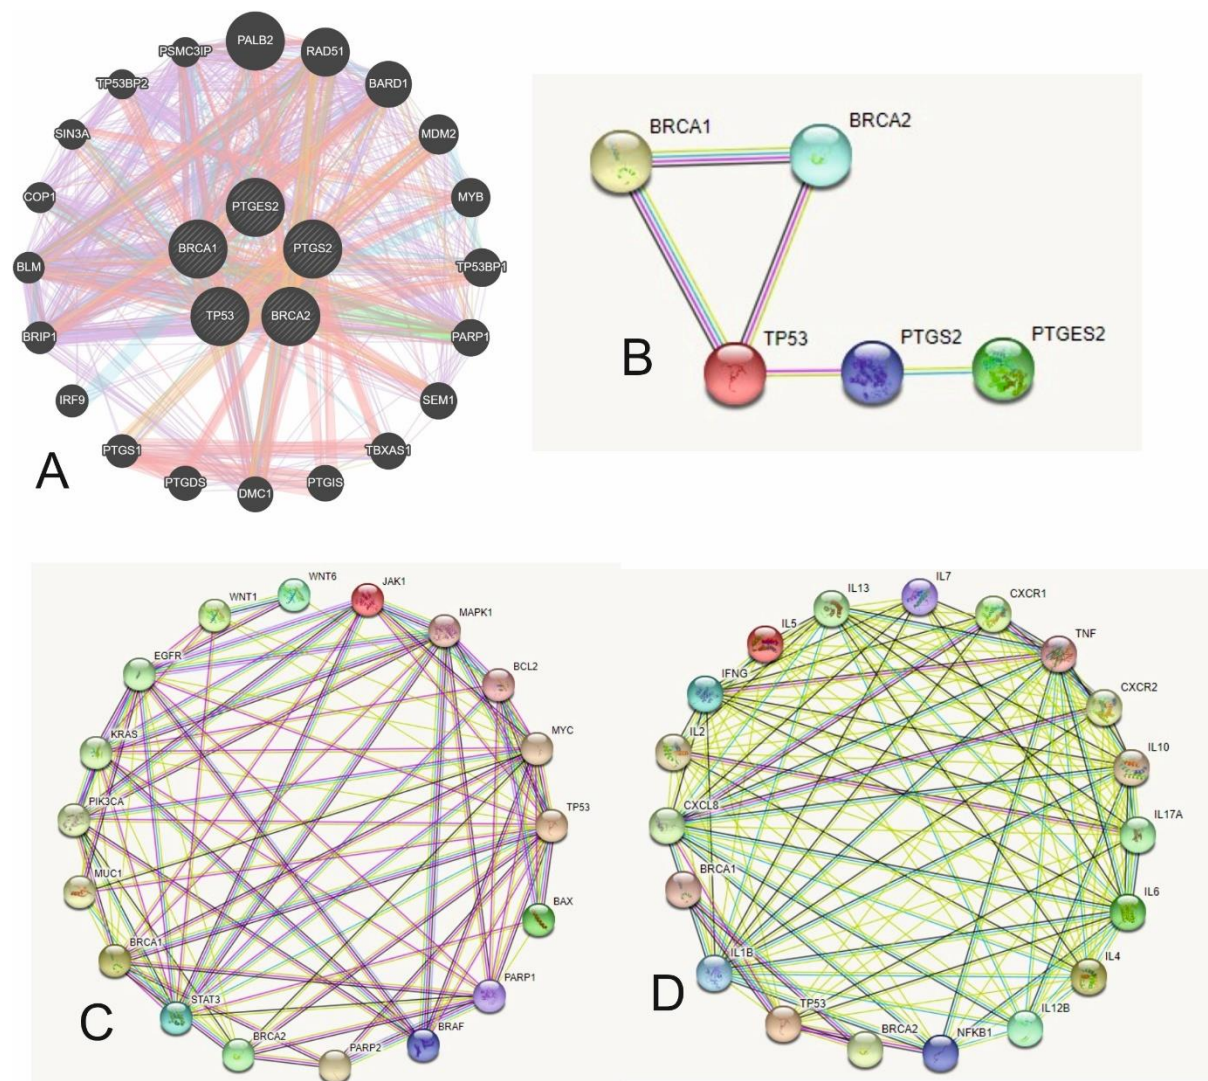

Supplement: s1 [file s1]
