# Supplementary material for: Aspirin and Cancer Survival: An Analysis of Molecular Mechanisms
Source: MDPI journal article supplement (doi:10.3390/cancers16010223), 2024-01-03
Supplement: s1 [file s1]

Additional file S4: Interaction of signal transduction pathway with 37 identified genes produced by Reactome database

**24 submitted entities found in this pathway, mapping to 31 Reactome entities**

| Input  | UniProt Id      | Input | UniProt Id                       | Input | UniProt Id     |
|--------|-----------------|-------|----------------------------------|-------|----------------|
| BAX    | Q07812          | BCL2  | P10415                           | BRAF  | P15056         |
| CXCR1  | P25024          | CXCR2 | P25024, P25025                   | EGFR  | P00533, P04626 |
| IL2    | P60568          | IL5   | P05113                           | IL6   | P05231         |
| IL8    | P10145          | JAK1  | P23458                           | JAK2  | O60674         |
| JAK3   | P52333          | KRAS  | P01116, P01116-1, P01116-2       | MAPK  | P28482         |
| Myc    | P01106          | NFKB1 | P19838                           | PARP1 | P09874         |
| PIK3CA | P42336          | STAT3 | P40763                           | TNF   | P01375         |
| WNT1   | P04628          | WNT6  | Q9Y6F9                           | p53   | P04637         |
| Input  | Ensembl Id      | Input | Ensembl Id                       |       |                |
| BCL2   | ENSG00000171791 | Myc   | ENSG00000136997, ENST00000377970 |       |                |

## Interactors found in the analysis (24)

| Input | UniProt Id               | Interacts with                                                                                                                                                                                                                                                                                                                                                                                                                                                                                                                         | Input  | UniProt Id                                      | Interacts with                                                                                                                                                                                                                                                 |
|-------|--------------------------|----------------------------------------------------------------------------------------------------------------------------------------------------------------------------------------------------------------------------------------------------------------------------------------------------------------------------------------------------------------------------------------------------------------------------------------------------------------------------------------------------------------------------------------|--------|-------------------------------------------------|----------------------------------------------------------------------------------------------------------------------------------------------------------------------------------------------------------------------------------------------------------------|
| BAX   | Q07812, Q07813-1         | Q07817, P10415, O43521, Q07812                                                                                                                                                                                                                                                                                                                                                                                                                                                                                                         | BCL2   | P10415                                          | P22736, Q92934, P10415, O43521, P28482, Q07812                                                                                                                                                                                                                 |
| BRAF  | P15056                   | P04049, P36507, P15056, P31946, Q02750, P63104                                                                                                                                                                                                                                                                                                                                                                                                                                                                                         | BRCA1  | P38398                                          | P24385, Q8WX92, P52292, P62136, Q7Z569                                                                                                                                                                                                                         |
| BRCA2 | P51587                   | P09874                                                                                                                                                                                                                                                                                                                                                                                                                                                                                                                                 | CXCR2  | P25025                                          | P10145                                                                                                                                                                                                                                                         |
| EGFR  | P00533-4, P00533         | P25098, Q14247, P35813, P07900, P19174, P12931, P15498, Q05209, P46109, Q99962, Q99963, Q96JA1, O14544, Q13480, O14543, P27986, P46108, P40763, P04049, Q13322, Q68CZ2, P46934, P16234, Q99952, Q05513, P41240, P00533, P29353, P22681, P30307, P32121, P29350, Q06124, Q03135, Q99075, Q05397, P08581, P17252, P23528, Q07889, Q9UQB8, Q99704, P63104, P01135, P42685, P01133, Q9UGK3, P31946, Q14956, Q12933, P18031, P31749, Q13905, P52306, P30530, Q02790, Q9UQC2, Q9UNE7, P00519, P53041, P06493, Q16620, P45983, P04792, Q13153 | IL10   | P22301                                          | P25490                                                                                                                                                                                                                                                         |
| IL2   | IL2                      | Q13547                                                                                                                                                                                                                                                                                                                                                                                                                                                                                                                                 | IL4    | P05112                                          | P31785                                                                                                                                                                                                                                                         |
| IL8   | EBI-1566585, P10145      | Q92793, P25025                                                                                                                                                                                                                                                                                                                                                                                                                                                                                                                         | JAK1   | P23458                                          | O60674, P40763                                                                                                                                                                                                                                                 |
| JAK2  | O60674, Q62120           | P46527, O60674, P18031                                                                                                                                                                                                                                                                                                                                                                                                                                                                                                                 | JAK3   | P52333                                          | Q9UNE7                                                                                                                                                                                                                                                         |
| KRAS  | P01116, P01116-2, P32883 | P04049, P15056, P01116-2, P61586                                                                                                                                                                                                                                                                                                                                                                                                                                                                                                       | MUC1   | P15941-11, P15941                               | P01350, P00519, P12931, P00533                                                                                                                                                                                                                                 |
| Myc   | P01106, EBI-1265559      | Q8N6T7, O15111, P06307, Q13526, Q13547, Q14839, O43524, Q9Y4A5, P37173, P52292, P08047, O60341, O15169, P49841, P04792, P23771, P40763                                                                                                                                                                                                                                                                                                                                                                                                 | NFKB1  | P25799-1, P19838-PRO_0000030311, P19838, P25799 | Q15788, O15111, Q8IZL8, Q13547, O00255, Q9Y297, P35222, P25963                                                                                                                                                                                                 |
| PARP1 | P09874                   | P22415, Q9NTX7, P09874                                                                                                                                                                                                                                                                                                                                                                                                                                                                                                                 | PIK3CA | P42336                                          | P27986, P35568, P42336, P01100                                                                                                                                                                                                                                 |
| STAT  | EBI-10952519             | P40763                                                                                                                                                                                                                                                                                                                                                                                                                                                                                                                                 | STAT3  | EBI-9914958, P40763-2, P40763                   | P22681, P18031, Q9NP31, Q9UBE8, P12931, O43318, P22736, P43405, Q9NWQ8, P08047, P49137, P00533, P06401, P40763                                                                                                                                                 |
| TNF   | P01375                   | Q15628, O15552, Q12933, Q13546, P01375                                                                                                                                                                                                                                                                                                                                                                                                                                                                                                 | p53    | P04637, P04637-7, P04637-1                      | Q09472, Q9Y265, P10415, P29590, Q05397, P22736, P17844, Q92793, O14641, P08047, Q92993, P63104, Q93009, P09874, P49757, Q13526, Q13547, O14980, Q15648, O43524, Q9UHC7, Q06330, Q96ST3, Q00987, P35232, Q15291, P04271, O15169, P49841, P04792, Q15796, Q9UBL3 |

10 submitted entities found in this pathway, mapping to 12 Reactome entities

| Input | UniProt Id | Input | UniProt Id | Input  | UniProt Id         |
|-------|------------|-------|------------|--------|--------------------|
| BAX   | Q07812     | BRAF  | P15056     | EGFR   | P00533, P04626     |
| JAK2  | O60674     | JAK3  | P52333     | KRAS   | P01116-1, P01116-2 |
| MAPK  | P28482     | Myc   | P01106     | PIK3CA | P42336             |
| STAT3 | P40763     |       |            |        |                    |

Interactors found in the analysis (16)

| Input  | UniProt Id                    | Interacts with                                                                                                                                                                                                                                                                                                         | Input | UniProt Id          | Interacts with                         |
|--------|-------------------------------|------------------------------------------------------------------------------------------------------------------------------------------------------------------------------------------------------------------------------------------------------------------------------------------------------------------------|-------|---------------------|----------------------------------------|
| BAX    | Q07812                        | Q07812                                                                                                                                                                                                                                                                                                                 | BCL2  | P10415              | Q07812                                 |
| BRAF   | P15056                        | P15056                                                                                                                                                                                                                                                                                                                 | BRCA1 | P38398              | Q8WX92                                 |
| EGFR   | P00533-4, P00533              | P07900, P29353, P22681, P19174, P29350, Q06124, Q03135, P12931, Q05397, P15498, Q05209, P46109, Q99962, Q99963, P08581, P17252, Q07889, Q9UQB8, Q96JA1, O14544, Q13480, P27986, P46108, P40763, P01133, Q13322, Q68CZ2, P31749, Q13905, P30530, Q9UQC2, Q9UNE7, P46934, P16234, Q99952, P41240, Q16620, P00533, P04792 | IL4   | P05112              | P31785                                 |
| JAK1   | P23458                        | O60674, P40763                                                                                                                                                                                                                                                                                                         | JAK2  | O60674              | O60674                                 |
| JAK3   | P52333                        | Q9UNE7                                                                                                                                                                                                                                                                                                                 | KRAS  | P01116              | P15056, P61586                         |
| MUC1   | P15941                        | P12931, P00533                                                                                                                                                                                                                                                                                                         | Myc   | EBI-1265559, P01106 | Q14839, P04792, P40763                 |
| PIK3CA | P42336                        | P27986, P35568, P42336                                                                                                                                                                                                                                                                                                 | STAT  | EBI-10952519        | P40763                                 |
| STAT3  | EBI-9914958, P40763-2, P40763 | P22681, Q9NWQ8, Q9NP31, P49137, P12931, P00533, P06401, P40763                                                                                                                                                                                                                                                         | p53   | P04637              | Q96ST3, Q09472, P04271, P04792, Q05397 |

Interaction by TGF-Beta family

3 submitted entities found in this pathway, mapping to 4 Reactome entities

| Input | UniProt Id      | Input | UniProt Id | Input | UniProt Id |
|-------|-----------------|-------|------------|-------|------------|
| MAPK  | P28482          | Myc   | P01106     | PARP1 | P09874     |
| Input | Ensembl Id      |       |            |       |            |
| Myc   | ENSG00000136997 |       |            |       |            |

Interactors found in the analysis (9)

| Input | UniProt Id | Interacts with                                 | Input | UniProt Id                    | Interacts with         |
|-------|------------|------------------------------------------------|-------|-------------------------------|------------------------|
| BRCA2 | P51587     | P09874                                         | EGFR  | P00533                        | Q9UNE7, P35813, P22681 |
| IL2   | IL2        | Q13547                                         | JAK3  | P52333                        | Q9UNE7                 |
| Myc   | P01106     | P37173, Q13547, P08047                         | NFKB1 | P19838-PRO_0000030311, P19838 | Q13547, O00255         |
| PARP1 | P09874     | P09874                                         | STAT3 | P40763                        | P22681, P08047         |
| p53   | P04637     | Q09472, Q13547, O14980, P08047, Q15796, P09874 |       |                               |                        |

## Signaling by NOTCH

### 3 submitted entities found in this pathway, mapping to 4 Reactome entities

| Input | UniProt Id | Input           | UniProt Id | Input | UniProt Id |
|-------|------------|-----------------|------------|-------|------------|
| EGFR  | P00533     | Myc             | P01106     | p53   | P04637     |
| Input |            | Ensembl Id      |            |       |            |
| Myc   |            | ENSG00000136997 |            |       |            |

### Interactors found in the analysis (4)

| Input | UniProt Id | Interacts with | Input | UniProt Id  | Interacts with                 |
|-------|------------|----------------|-------|-------------|--------------------------------|
| EGFR  | P00533     | P31749         | IL8   | EBI-1566585 | Q92793                         |
| Myc   | P01106     | Q8N6T7         | p53   | P04637      | Q09472, Q92793, P49757, Q06330 |

## Wnt signaling

### 4 submitted entities found in this pathway, mapping to 6 Reactome entities

| Input | UniProt Id                       | Input | UniProt Id |
|-------|----------------------------------|-------|------------|
| KRAS  | P01116-2                         | Myc   | P01106     |
| WNT1  | P04628                           | WNT6  | Q9Y6F9     |
| Input | Ensembl Id                       |       |            |
| Myc   | ENSG00000136997, ENST00000377970 |       |            |

### Interactors found in the analysis (8)

| Input | UniProt Id                    | Interacts with                 | Input | UniProt Id | Interacts with                                                                 |
|-------|-------------------------------|--------------------------------|-------|------------|--------------------------------------------------------------------------------|
| BRAF  | P15056                        | P63104                         | EGFR  | P00533     | P17252, P32121, P63104                                                         |
| IL2   | IL2                           | Q13547                         | Myc   | P01106     | Q9Y4A5, Q13547, O15169, P49841                                                 |
| NFKB1 | P19838-PRO_0000030311, P19838 | Q13547, O00255, Q9Y297, P35222 | PARP1 | P09874     | Q9NTX7                                                                         |
| STAT3 | P40763                        | Q9UBE8, O43318                 | p53   | P04637     | Q9Y265, Q13547, O14980, Q15291, O14641, Q92993, O15169, P49841, P63104, Q9UBL3 |
