# Supplementary figures and images for: Aspirin and Cancer Survival: An Analysis of Molecular Mechanisms
Source: MDPI journal article supplement (doi:10.3390/cancers16010223), 2024-01-03

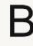

Supplement: s1 [file s1]
